# Supplementary material for: Diversity-oriented synthesis of chromone inden-1-one-fused cyclopentadienylides and C-acylated chromone adducts via allylic phosphorus ylides
Source: Royal Society of Chemistry journal article supplement (doi:10.1039/d4cc03210a), 2024-01-01

## **Diversity-Oriented Synthesis of Chromone Inden-1-one fused Cyclopentadienylides and C-acylated Chromone Adducts *via* Allylic Phosphorus Ylides**

Durga Prasad Gurram, Gangababu Marri, Naveen Jothimani, Yi-Ru Chen, Wenwei Lin\*

Department of Chemistry, National Taiwan Normal University, 88, Sec. 4, Tingchow Road, Taipei 11677, Taiwan R.O.C.

### **Contents**

|                                                                                                                     |     |
|---------------------------------------------------------------------------------------------------------------------|-----|
| I. General Information                                                                                              | S2  |
| II. Preliminary studies                                                                                             | S3  |
| III. Plausible reaction mechanism for compound <b>6</b>                                                             | S3  |
| IV. Detailed optimization of compound <b>5aa</b>                                                                    | S4  |
| V. Typical procedures for the preparation of New compounds                                                          | S5  |
| VI. Characterization of all Compounds                                                                               | S6  |
| VII. X-ray Crystallographic Data                                                                                    | S40 |
| VIII. <sup>1</sup> H NMR, <sup>13</sup> C NMR, <sup>19</sup> F NMR, and <sup>31</sup> P NMR Spectra of All Products | S43 |

## I. General Information

### a) Materials and reagents

All reactions were carried out under argon atmosphere in oven-dried glassware with magnetic stirring. All solvents and reagents were used as purchased from commercial suppliers without further purification. Triethylamine (Et<sub>3</sub>N) was freshly distilled from calcium hydride under argon atmosphere and stored over 4 Å molecular sieves. Starting materials which were not commercially available were synthesized according to the previously reported methods.

### b) Instrumentation

**Thin layer chromatography (TLC):** TLC analyses were performed on precoated aluminum-backed silica gel plate (Merck 60 F254, 0.2 mm thickness) which was visualized by fluorescence quenching.

**Flash Column Chromatography:** The crude products were purified on silica gel (Merck Kieselgel 60 230-400 mesh).

**NMR Spectroscopy:** <sup>1</sup>H, <sup>13</sup>C{<sup>1</sup>H}, <sup>19</sup>F{<sup>1</sup>H}, and <sup>31</sup>P{<sup>1</sup>H}-NMR spectra were recorded on an Oxford JEOL 400 MHz spectrometer, a Bruker Ascend 400 MHz spectrometer (400 MHz for <sup>1</sup>H, 100 MHz for <sup>13</sup>C, 376 MHz for <sup>19</sup>F, and 162 MHz for <sup>31</sup>P). All NMR spectra were recorded at 299 K unless otherwise noted. Chemical shifts are reported in δ ppm referenced to an internal standard, such as TMS for <sup>1</sup>H-NMR (δ = 0.0 ppm), CDCl<sub>3</sub> for <sup>13</sup>C-NMR (δ = 77.0 ppm), CD<sub>2</sub>Cl<sub>2</sub> for <sup>13</sup>C-NMR (δ = 53.5 ppm). The following abbreviations were used to explain the multiplicities: s (singlet), d (doublet), t (triplet), q (quartet), sep (septet), m (multiplet), brs (broad singlet), dd (doublet of doublet), td (triplet of doublet), dtd (doublet of triplet of doublet) and p (pseudo). Coupling constants (J) are reported in Hertz (Hz).

**Single Crystal X-Ray Diffraction:** The X-ray diffraction measurements were carried out at 200 K or 224 K on either a Bruker D8 Venture or a Bruker KAPPA APEX II CCD area detector system equipped with a graphite monochromator, a Mo-Kα fine-focus sealed tube (k = 0.71073 Å) or a Cu-Kα fine-focus sealed tube (k = 1.54178 Å).

**Melting Point:** Melting points were measured on a hot stage melting point apparatus and were uncorrected.

**High-Resolution Mass Spectrometry (HRMS):** HRMS were recorded on Waters XeVo G2-S QToF using ESI (TOF analyzer) or JEOL JMS-700 using EI (double-focusing magnetic sector). UltrafleXtreme MALDI-TOF/TOF using MALDI (Bruker

Daltonik, Bremen, Germany).

## II. Preliminary studies

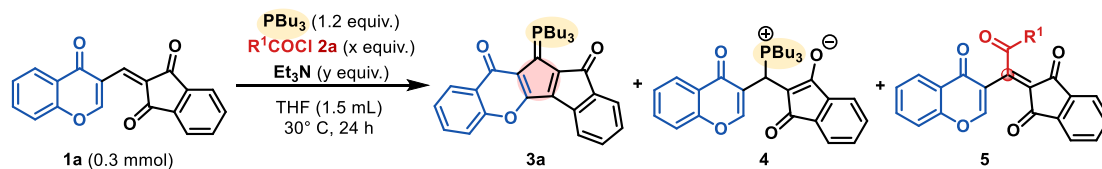

| entry          | $\text{R}^1\text{COCl}$<br>(x equiv.) | $\text{Et}_3\text{N}$<br>(y equiv.) | t (h) | <b>3a</b><br>(%) <sup>a</sup> | <b>5/4</b><br>(%) <sup>a</sup> |
|----------------|---------------------------------------|-------------------------------------|-------|-------------------------------|--------------------------------|
| 1              | PhCOCl (1.5)                          | 1.8                                 | 24    | 37                            | 5/42                           |
| 2              | 4-Me-BzCl (1.5)                       | 1.8                                 | 24    | 29                            | 2/55                           |
| 3              | 4-OMePhCl (1.5)                       | 1.8                                 | 24    | 32                            | 3/57                           |
| 4              | 4-NO <sub>2</sub> PhCl (1.5)          | 1.8                                 | 24    | 20                            | 7/45                           |
| 5              | (Boc) <sub>2</sub> O (1.5)            | 1.8                                 | 24    | 0                             | 0/93                           |
| 6 <sup>c</sup> | PhCOCl (1.5)                          | 1.8                                 | 24    | 27                            | 4/60                           |
| 7              | PhCOCl (2.5)                          | 2.8                                 | 22    | 50                            | 20/15                          |
| 8              | PhCOCl (3.0)                          | 3.6                                 | 24    | 57                            | 13/0                           |

<sup>a</sup>Yield of the products **3a**, **4** & **5** were determined by <sup>1</sup>H NMR analysis of the crude reaction mixture using triphenyl methane as an internal standard. <sup>b</sup>Reaction carried out at  $60^\circ\text{C}$ .

## III. Reaction conditions and plausible reaction mechanism for compound 6.

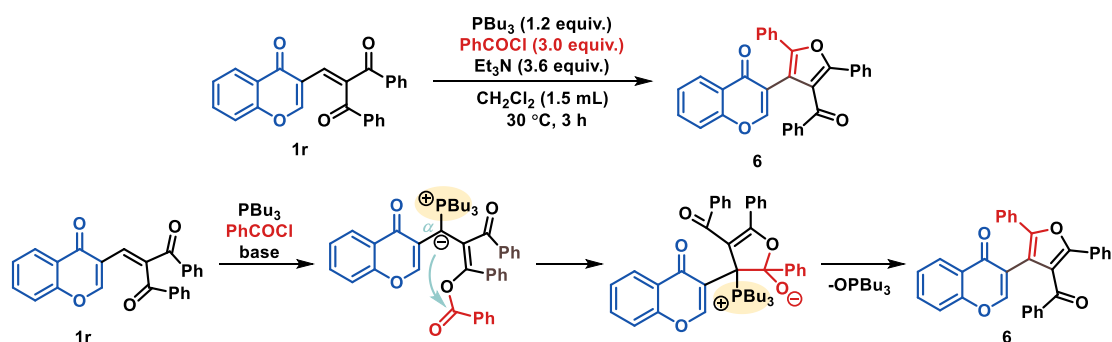

#### IV. Detailed optimization of compound 5aa.<sup>a</sup>

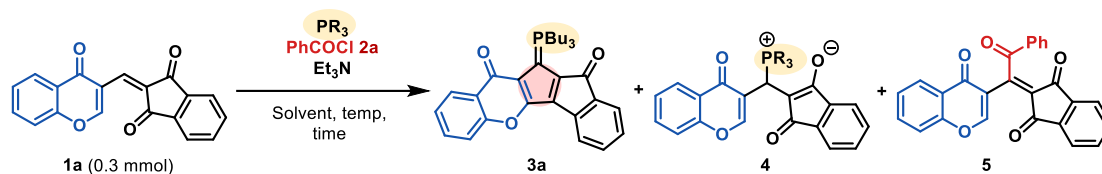

| entry           | $\text{PR}_3$ (mol%)         | $\text{PhCOCl}$<br>(equiv.) | Base<br>(equiv.)            | Solvent<br>(mL)        | t<br>(h) | <b>5aa</b><br>(%) <sup>b</sup> | <b>1a/4</b><br>(%) <sup>b</sup> |
|-----------------|------------------------------|-----------------------------|-----------------------------|------------------------|----------|--------------------------------|---------------------------------|
| 1               | $\text{MePPH}_2$ (120)       | 3.0                         | $\text{Et}_3\text{N}$ (3.6) | THF                    | 5        | 81                             | 0                               |
| 2               | $\text{MePPH}_2$ (20)        | 3.0                         | $\text{Et}_3\text{N}$ (3.6) | THF                    | 0.5      | 99                             | 0                               |
| 3               | $\text{MePPH}_2$ (20)        | 1.2                         | $\text{Et}_3\text{N}$ (1.3) | THF                    | 3        | 71                             | 18                              |
| 4               | $\text{Me}_2\text{PPh}$ (20) | 1.2                         | $\text{Et}_3\text{N}$ (1.3) | THF                    | 0.5      | 88                             | 0(6)                            |
| 5               | $\text{Et}_2\text{PPh}$ (20) | 1.2                         | $\text{Et}_3\text{N}$ (1.3) | THF                    | 3        | 39                             | 38                              |
| 6               | $\text{EtPPH}_2$ (20)        | 1.2                         | $\text{Et}_3\text{N}$ (1.3) | THF                    | 3        | 36                             | 49                              |
| 7               | $\text{PBu}_3$ (20)          | 1.2                         | $\text{Et}_3\text{N}$ (1.3) | THF                    | 4        | 36                             | 32(4)                           |
| 8               | $\text{PPh}_3$ (20)          | 1.2                         | $\text{Et}_3\text{N}$ (1.3) | THF                    | 24       | 0                              | 86                              |
| 9               | $\text{Me}_2\text{PPh}$ (20) | 1.2                         | $\text{Et}_3\text{N}$ (1.3) | $\text{Et}_2\text{O}$  | 0.5      | 0                              | 24(0)                           |
| 10              | $\text{Me}_2\text{PPh}$ (20) | 1.2                         | $\text{Et}_3\text{N}$ (1.3) | $\text{CH}_3\text{CN}$ | 3        | 28                             | 40(13)                          |
| 11              | $\text{Me}_2\text{PPh}$ (20) | 1.2                         | $\text{Et}_3\text{N}$ (1.3) | toluene                | 18       | 47                             | 34(18)                          |
| 12              | $\text{Me}_2\text{PPh}$ (20) | 1.2                         | $\text{Et}_3\text{N}$ (1.3) | DCM                    | 3        | 53                             | 22(8)                           |
| 13              | $\text{Me}_2\text{PPh}$ (20) | 1.2                         | $\text{Et}_3\text{N}$ (1.3) | DCE                    | 3        | 57                             | 17(10)                          |
| 14              | $\text{Me}_2\text{PPh}$ (20) | 1.2                         | $\text{Et}_3\text{N}$ (1.3) | $\text{EtOAc}$         | 18       | 53                             | 30(17)                          |
| 15              | $\text{Me}_2\text{PPh}$ (20) | 1.2                         | DIPEA (1.3)                 | THF                    | 0.5      | 87                             | 0                               |
| 16              | $\text{Me}_2\text{PPh}$ (20) | 1.2                         | DBU (1.3)                   | THF                    | 5        | 11                             | 3(8)                            |
| 17              | $\text{Me}_2\text{PPh}$ (20) | 1.2                         | DMAP (1.3)                  | THF                    | 0.5      | 0                              | 35(13)                          |
| 18              | $\text{Me}_2\text{PPh}$ (20) | 1.2                         | $\text{Et}_3\text{N}$ (1.5) | THF                    | 2        | 87                             | (10)                            |
| 19              | $\text{Me}_2\text{PPh}$ (20) | 1.3                         | $\text{Et}_3\text{N}$ (1.5) | THF                    | 0.5      | 88                             | (5)                             |
| 20              | $\text{Me}_2\text{PPh}$ (20) | 1.2                         | $\text{Et}_3\text{N}$ (1.3) | THF (0.75)             | 5        | 87                             | (6)                             |
| 21              | $\text{Me}_2\text{PPh}$ (10) | 1.2                         | $\text{Et}_3\text{N}$ (1.3) | THF                    | 2        | 74                             | 16(4)                           |
| 22 <sup>c</sup> | $\text{Me}_2\text{PPh}$ (20) | 1.2                         | $\text{Et}_3\text{N}$ (1.3) | THF                    | 2        | 89                             | 0                               |

<sup>a</sup>Unless otherwise specified, all reactions were carried out with **1a** (0.3 mmol),  $\text{PhCOCl}$  **2a**, Base and  $\text{PR}_3$ , in the given anhydrous solvent (1.5 mL) under argon atmosphere at 30 °C. <sup>b</sup>Yield of the products **5aa** & **4**, **1a**



were determined by  $^1\text{H}$  NMR analysis of the crude reaction mixture using triphenyl methane as an internal standard. <sup>c</sup>Reaction carried out at 60 °C.

### V. a) Typical Procedure for the Preparation of compound 1 (TP-A)

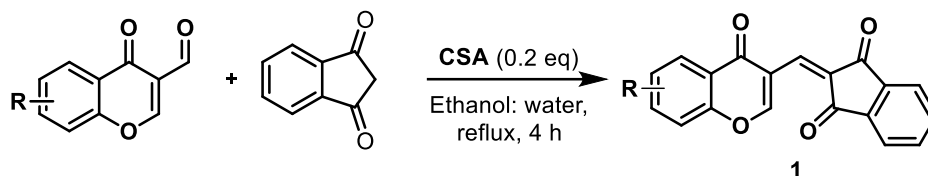

Following the reported procedure<sup>1</sup>, a round-bottomed flask equipped with a magnetic stir bar was charged with 3-Formylchromone<sup>2</sup> (5.0 mmol.), 1,3-indanedione (1.0 equiv.), and ( $\pm$ )-Camphor-10-Sulfonic Acid (CSA) (0.2 equiv.) in water: EtOH (1:1) at 80 °C in an oil bath for 4 h. After that, the resulting mixture was filtered under a vacuum and the residue was washed with methanol (2 times) then ethyl ether (2 times) to obtain product 1.

### b) Typical Procedure for the Preparation of compound 3 (TP-B).

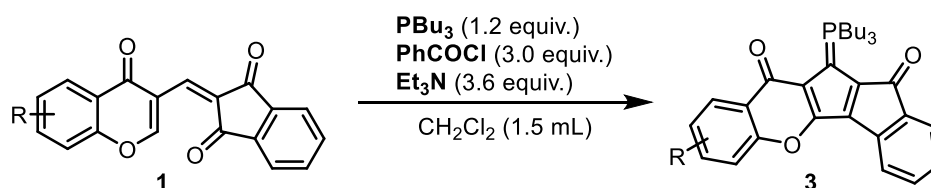

A dry and argon-flushed 10 mL Schlenk flask equipped with a magnetic stir bar was charged with 1 (0.3 mmol.),  $\text{PBu}_3$  (1.2 equiv.),  $\text{PhCOCl}$  2a (3.0 equiv.), and  $\text{Et}_3\text{N}$  (3.6 equiv.) in anhydrous  $\text{CH}_2\text{Cl}_2$  (1.5 mL) at 30 °C. After completion of the reaction, the reaction mixture was diluted with  $\text{CH}_2\text{Cl}_2$  (4 mL), and the organic phase was washed with sodium bicarbonate solution. The resulted organic layer was dried over sodium sulfate and filtered through filter paper then the organic solution was concentrated under vacuum. Further, the crude reaction mixture was purified by flash column chromatography on silica gel to obtain the desired products 3.

### c) Typical Procedure for the Preparation of compound 5 (TP-C).

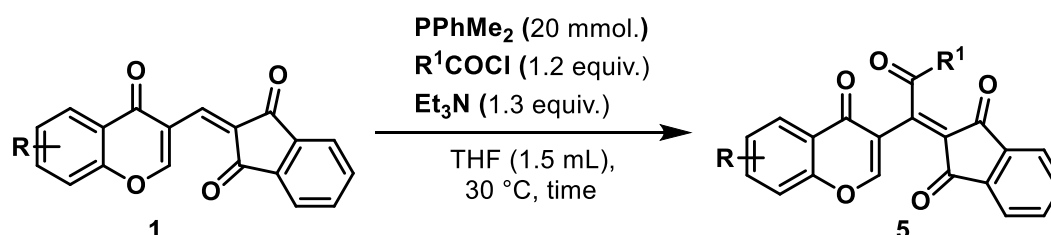

A dry and argon-flushed 10 mL Schlenk flask equipped with a magnetic stir bar was charged with compound **1** (0.3 mmol.), PPhMe<sub>2</sub> (0.2 equiv.), R<sup>1</sup>COCl (1.2 equiv.), and Et<sub>3</sub>N (1.3 equiv.) in anhydrous THF (1.5 mL) at 30 °C. After completion of the reaction, the solvent was removed under vacuum and the crude residue was subjected to flash column chromatography on silica gel to obtain the desired products **5**.

## VI. Characterization of all Compounds

### 2-((4-oxo-4H-chromen-3-yl)methylene)-1H-indene-1,3(2H)-dione **1a**.

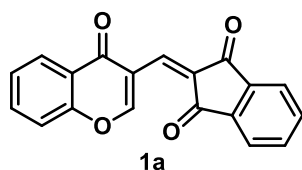

Following the **TP-A**, **1a** was obtained from 4-oxo-4H-chromene-3-carbaldehyde (0.87 g, 5.0 mmol), 1H-indene-1,3(2H)-dione (0.73 g, 1.0 equiv.), and CSA (0.23 g, 0.2 equiv.). The residue was filtered under vacuum and obtain **1a** as a pale yellow solid (1.2 g, 80% yield).  $R_f = 0.50$  (Hexanes:EtOAc = 7:3) : mp.: 277.3-278.5 °C.

<sup>1</sup>H NMR (400 MHz, CDCl<sub>3</sub>) δ/ppm: 10.40 (s, 1H), 8.44 (s, 1H), 8.32 (dd,  $J = 8.1, 1.6$  Hz, 1H), 8.08-7.98 (m, 2H), 7.89-7.80 (m, 2H), 7.75 (dtd,  $J = 8.7, 7.2, 1.7$  Hz, 1H), 7.57 (dd,  $J = 8.4, 0.5$  Hz, 1H), 7.50 (dtd,  $J = 9.1, 7.2, 0.9$  Hz, 1H).

<sup>13</sup>C{<sup>1</sup>H}-NMR (100 MHz, CDCl<sub>3</sub>) δ/ppm: 190.2, 189.0, 175.3, 163.4, 156.1, 142.1, 140.4, 136.5, 135.6, 135.4, 134.5, 129.4, 126.7, 126.4, 124.0, 123.6, 123.4, 118.6, 118.7.

HRMS (EI)  $m/z$ : [M]<sup>+</sup> calcd for C<sub>19</sub>H<sub>11</sub>O<sub>4</sub>: 302.0579 found: 302.0600.

### 2-(5-methyl-2-phenylbenzofuran-3-yl)-1-oxo-1H-inden-3-yl pivalate **1b**.

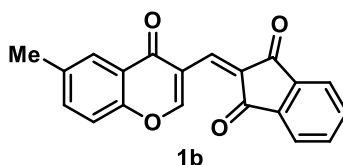

Following the **TP-A**, **1b** was obtained from 6-methyl-4-oxo-4H-chromene-3-carbaldehyde (0.94 g, 5.0 mmol), and 1H-indene-1,3(2H)-dione (0.73 g, 1.0 equiv.), CSA (0.23 g, 0.2 equiv.). The residue was filtered under a vacuum and obtain **1b** as a pale green solid (1.1 g, 70%).  $R_f = 0.50$  (Hexanes:EtOAc = 8:2) ; mp.: 228.2-229.4 °C.

<sup>1</sup>H NMR (400 MHz, CDCl<sub>3</sub>) δ/ppm: 10.37 (s, 1H), 8.43 (pd,  $J = 0.6$  Hz, 1H), 8.09 (pd,  $J = 1.1$  Hz, 1H), 8.06-7.97 (m, 2H), 7.87-7.79 (d, 2H), 7.54 (d,  $J = 8.7, 2.2$  Hz, 1H), 7.45 (pd,  $J = 8.5$  Hz, 1H), 2.49 (s, 3H).

<sup>13</sup>C{<sup>1</sup>H}-NMR (100 MHz, CDCl<sub>3</sub>) δ/ppm: 190.2, 189.1, 175.3, 163.4, 154.3, 142.1, 140.3, 136.8, 136.6, 135.6, 135.5, 135.3, 129.1, 126.0, 123.6, 123.5, 123.3, 118.4, 118.3,

20.9.

**HRMS** (EI)  $m/z$ :  $[M]^+$  calcd for  $C_{20}H_{12}O_4$ : 316.0736 found: 316.0737.

**2-(5-methoxy-2-phenylbenzofuran-3-yl)-1-oxo-1H-inden-3-yl pivalate 1c.**

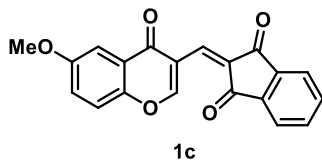

Following the **TP-A**, **1c** was obtained from 6-methoxy-4-oxo-4H-chromene-3-carbaldehyde (1.02 g, 5.0 mmol), and 1H-indene-1,3(2H)-dione (0.73 g, 1.0 equiv.), CSA (0.23 g, 0.2 equiv.). The residue was filtered under a vacuum and obtain **1c** as a pale green solid (1.2 g, 72%).  $R_f$  = 0.38 (Hexanes:EtOAc = 7:3) ; mp.: 266.7-267.7 °C.  $^1H$  NMR (400 MHz,  $CDCl_3$ )  $\delta$ /ppm: 10.37 (s, 1H), 8.46 (s, 1H), 8.08-7.96 (m, 2H), 7.89-7.89 (m, 2H), 7.68 (d,  $J$  = 3.1 Hz, 1H), 7.49 (pd,  $J$  = 9.1 Hz, 1H), 7.32 (dd,  $J$  = 9.1, 3.1 Hz, 1H), 3.93 (s, 3H).

$^{13}C\{^1H\}$ -NMR (100 MHz,  $CDCl_3$ )  $\delta$ /ppm: 190.2, 189.2, 175.2, 163.1, 157.8, 150.8, 142.1, 140.3, 136.9, 135.5, 135.3, 129.1, 124.8, 124.3, 123.5, 123.4, 120.0, 117.8, 105.9, 50.1.

**HRMS** (EI)  $m/z$ :  $[M]^+$  calcd for  $C_{20}H_{12}O_5$ : 332.0685 found: 332.0677.

**2-((6-fluoro-4-oxo-4H-chromen-3-yl)methylene)-1H-indene-1,3(2H)-dione 1d.**

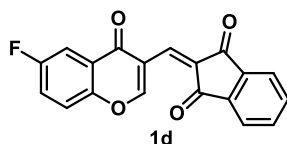

Following the **TP-A**, **1d** was obtained from 6-fluoro-4-oxo-4H-chromene-3-carbaldehyde (0.96 g, 5.0 mmol), and 1H-indene-1,3(2H)-dione (0.73 g, 1.0 equiv.), CSA (0.23 g, 0.2 equiv.). The residue was filtered under a vacuum and obtain **1d** as a half-white solid (1.1 g, 68%).  $R_f$  = 0.40 (Hexanes:EtOAc = 8:2) ; mp.: 265.8-266.9 °C  $^1H$  NMR (400 MHz,  $CDCl_3$ )  $\delta$ /ppm: 10.39 (d,  $J$  = 0.6 Hz, 1H), 8.39 (s, 1H), 8.06-8.00 (m, 2H), 7.96 (dd,  $J$  = 8.6, 3.1 Hz, 1H), 7.88-7.80 (m, 2H), 7.60 (dd,  $J$  = 9.1, 4.1 Hz, 1H), 7.51-7.43 (m, 1H).

$^{13}C\{^1H\}$ -NMR (100 MHz,  $CDCl_3$ )  $\delta$ /ppm: 190.1, 188.9, 174.1, 163.2, 154.8, 142.2, 140.4, 137.5, 135.7, 135.5, 129.8, 129.3, 125.2, 123.6, 123.5, 120.5, 119.9, 118.7.

$^{19}F$  NMR (376 MHz,  $CDCl_3$ )  $\delta$ /ppm: -112.9.

**HRMS** (EI)  $m/z$ :  $[M]^+$  calcd for  $C_{19}H_9FO_4$ : 320.0485 found: 320.0466.

**2-((6-chloro-4-oxo-4H-chromen-3-yl)methylene)-1H-indene-1,3(2H)-dione 1e.**

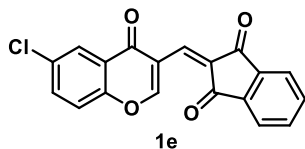

Following the **TP-A**, **1e** was obtained from 6-chloro-4-oxo-4H-chromene-3-carbaldehyde (1.04 g, 5.0 mmol), and 1H-indene-1,3(2H)-dione (0.73 g, 1.0 equiv.), CSA (0.23 g, 0.2 equiv.). The residue was filtered under a vacuum and obtain **1e** as a half-white solid (1.0 g, 60%).  $R_f = 0.40$  (Hexanes:EtOAc = 8:2); mp.: 271.2-272.3 °C.  $^1\text{H NMR}$  (400 MHz,  $\text{CDCl}_3$ )  $\delta$ /ppm: 10.37 (s, 1H), 8.38 (s, 1H), 8.28 (d,  $J = 2.6$  Hz, 1H), 8.06-7.99 (m, 2H), 7.89-7.82 (m, 2H), 7.69 (dd,  $J = 8.7, 2.6$  Hz, 1H), 7.53 (d,  $J = 8.9$  Hz, 1H).

$^{13}\text{C}\{^1\text{H}\}$ -NMR (100 MHz,  $\text{CDCl}_3$ )  $\delta$ /ppm: 190.1, 188.9, 174.1, 163.2, 154.8, 142.2, 140.4, 137.5, 135.7, 135.5, 129.8, 129.3, 125.2, 123.6, 123.5, 120.5, 119.9, 118.7.

HRMS (EI) m/z:  $[\text{M}]^+$  calcd for  $\text{C}_{19}\text{H}_9^{35}\text{ClO}_4$ : 336.0189 found: 336.0197.

HRMS (EI) m/z:  $[\text{M}]^+$  calcd for  $\text{C}_{19}\text{H}_9^{37}\text{ClO}_4$ : 338.0160 found: 338.0156.

#### 2-((6-bromo-4-oxo-4H-chromen-3-yl)methylene)-1H-indene-1,3(2H)-dione **1f**.

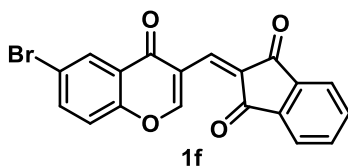

Following the **TP-A**, **1f** was obtained from 6-bromo-4-oxo-4H-chromene-3-carbaldehyde (1.25 g, 5.0 mmol), and 1H-indene-1,3(2H)-dione (0.73 g, 1.0 equiv.), CSA (0.23 g, 0.2 equiv.). The residue was filtered under a vacuum and obtain **1f** as a pale green solid (1.0 g, 52%).  $R_f = 0.38$  (Hexanes:EtOAc = 9:1); mp.: 264.4-265.6 °C.  $^1\text{H NMR}$  (400 MHz,  $\text{CDCl}_3$ )  $\delta$ /ppm: 10.37 (s, 1H), 8.45 (d,  $J = 2.4$  Hz, 1H), 8.37 (s, 1H), 8.07-7.97 (m, 2H), 7.90-7.80 (m, 3H), 7.47 (d,  $J = 8.9$  Hz, 1H).

$^{13}\text{C}\{^1\text{H}\}$ -NMR (100 MHz,  $\text{CDCl}_3$ )  $\delta$ /ppm: 190.1, 188.9, 174.1, 163.2, 154.8, 142.2, 140.4, 137.5, 135.7, 135.5, 129.8, 129.3, 125.2, 123.6, 123.5, 120.5, 119.9, 118.7.

HRMS (EI) m/z:  $[\text{M}]^+$  calcd for  $\text{C}_{19}\text{H}_9^{79}\text{BrO}_4$ : 379.9684 found: 379.9700.

HRMS (EI) m/z:  $[\text{M}]^+$  calcd for  $\text{C}_{19}\text{H}_9^{81}\text{BrO}_4$ : 381.9664 found: 381.9627.

#### 2-((6-nitro-4-oxo-4H-chromen-3-yl)methylene)-1H-indene-1,3(2H)-dione **1g**.

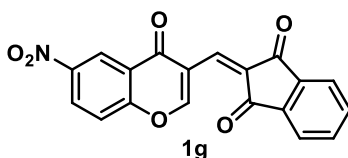

Following the **TP-A**, **1g** was obtained from 6-nitro-4-oxo-4H-chromene-3-

carbaldehyde (1.09 g, 5.0 mmol), and 1H-indene-1,3(2H)-dione (0.73 g, 1.0 equiv.), CSA (0.23 g, 0.2 equiv.). The residue was filtered under a vacuum and obtain **1g** as a pale yellow solid (1.3 g, 76%).  $R_f = 0.45$  (Hexanes:EtOAc = 6:4); mp.: 309.2-310.5 °C.  $^1\text{H NMR}$  (400 MHz,  $\text{CDCl}_3$ )  $\delta$ /ppm: 10.39 (s, 1H), 9.19 (d,  $J = 2.7$  Hz, 1H), 8.58 (dd,  $J = 9.7, 2.8$  Hz, 1H), 8.34 (s, 1H), 8.08-8.02 (m, 2H), 7.90-7.84 (m, 2H), 7.74 (d,  $J = 9.1$  Hz, 1H).  $^{13}\text{C}\{^1\text{H}\}$ -NMR (100 MHz,  $\text{CDCl}_3$ )  $\delta$ /ppm: 190.1, 188.5, 174.0, 162.8, 158.8, 145.5, 142.2, 140.5, 135.9, 135.6, 134.4, 130.8, 128.7, 123.1, 123.8, 123.6, 123.3, 120., 119. HRMS (EI)  $m/z$ :  $[\text{M}]^+$  calcd for  $\text{C}_{19}\text{H}_9\text{NO}_6$ : 347.0430 found: 347.0425.

### 2-((7-methyl-4-oxo-4H-chromen-3-yl)methylene)-1H-indene-1,3(2H)-dione **1h**.

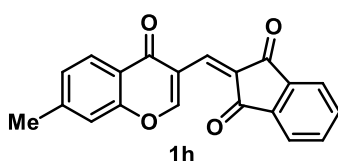

Following the **TP-B**, **1h** was obtained from 7-methyl-4-oxo-4H-chromene-3-carbaldehyde (0.94 g, 5.0 mmol), and 1H-indene-1,3(2H)-dione (0.73 g, 1.0 equiv.), CSA (0.23 g, 0.2 equiv.). The residue was filtered under a vacuum and obtain **1h** as a half-white solid (1.25 g, 80%).  $R_f = 0.45$  (Hexanes:EtOAc = 8:2); mp.: 224.4-225.6 °C.  $^1\text{H NMR}$  (400 MHz,  $\text{CDCl}_3$ )  $\delta$ /ppm: 10.34 (s, 1H), 8.40 (s, 1H), 8.17 (d,  $J = 8.2$  Hz, 1H), 8.06-7.94 (m, 2H), 7.87-7.78 (m, 2H), 7.33 (s, 1H), 7.28 (d,  $J = 8.0$  Hz, 1H), 2.51 (s, 3H).  $^{13}\text{C}\{^1\text{H}\}$ -NMR (100 MHz,  $\text{CDCl}_3$ )  $\delta$ /ppm: 190.1, 189.1, 175.1, 163.3, 156.1, 146.1, 142.0, 136.6, 135.5, 135.3, 129.0, 127.8, 126.3, 123.4, 123.3, 121.6, 118.4, 118.3, 21.8. HRMS (EI)  $m/z$ :  $[\text{M}]^+$  calcd for  $\text{C}_{20}\text{H}_{12}\text{O}_4$ : 316.0736 found: 316.0752.

### 2-((7-methoxy-4-oxo-4H-chromen-3-yl)methylene)-1H-indene-1,3(2H)-dione **1i**.

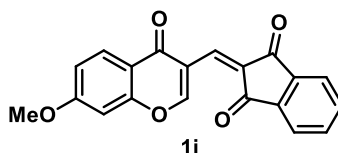

Following the **TP-B**, **1i** was obtained from 7-methoxy-4-oxo-4H-chromene-3-carbaldehyde (1.02 g, 5.0 mmol), and 1H-indene-1,3(2H)-dione (0.73 g, 1.0 equiv.), CSA (0.23 g, 0.2 equiv.). The residue was filtered under a vacuum and obtain **1i** as a half-white solid (1.1 g, 68%).  $R_f = 0.45$  (Hexanes:EtOAc = 7:2); mp.: 268.8-269.3 °C.  $^1\text{H NMR}$  (400 MHz,  $\text{CDCl}_3$ )  $\delta$ /ppm: 10.34 (s, 1H), 8.44 (s, 1H), 8.22 (d,  $J = 8.8$  Hz, 1H), 8.09-7.97 (m, 2H), 7.89-7.77 (m, 2H), 7.04 (dd,  $J = 9.2, 2.5$  Hz, 1H), 6.94 (d,  $J = 2.3$  Hz, 1H), 3.64 (s, 3H).

$^{13}\text{C}\{^1\text{H}\}$ -NMR (100 MHz,  $\text{CDCl}_3$ )  $\delta$ /ppm: 190.3, 189.1, 174.5, 164.7, 163.1, 157.8, 142.1, 140.4, 136.8, 135.5, 135.3, 129.2, 128.1, 123.5, 123.3, 118.6, 117.7, 115.4, 101.0, 55.9.

HRMS (EI)  $m/z$ :  $[\text{M}]^+$  calcd for  $\text{C}_{20}\text{H}_{12}\text{O}_5$ : 332.0685 found: 332.0668.

**2-((7-fluoro-4-oxo-4H-chromen-3-yl)methylene)-1H-indene-1,3(2H)-dione **1j**.**

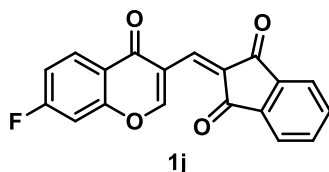

Following the **TP-A**, **1j** was obtained from 7-fluoro-4-oxo-4H-chromene-3-carbaldehyde (0.96 g, 5.0 mmol), and 1H-indene-1,3(2H)-dione (0.73 g, 1.0 equiv.), CSA (0.23 g, 0.2 equiv.). The residue was filtered under a vacuum and obtain **1j** as a half-white solid (1.1 g, 76%).  $R_f$  = 0.48 (Hexanes:EtOAc = 8:2) ; mp.: 284.3-285.5 °C.

$^1\text{H}$  NMR (400 MHz,  $\text{CDCl}_3$ )  $\delta$ /ppm: 10.36 (s, 1H), 8.39 (s, 1H), 8.34 (dd,  $J$  = 10, 6.2 Hz, 1H), 8.08-7.99 (m, 2H), 7.87-7.82 (m, 2H), 7.33-7.16 (m, 3H).

$^{13}\text{C}\{^1\text{H}\}$ -NMR (100 MHz,  $\text{CDCl}_3$ )  $\delta$ /ppm: 190.1, 188.9, 174.3, 167.3, 164.8, 163.2, 157.1 (d,  $J_{\text{C-F}}$  = 13.3 Hz) 142.2, 140.4, 135.8, 135.7, 135.5, 129.8, 129.1, 123.6, 123.4, 120.8, 118.7, 115.1 (d,  $J_{\text{C-F}}$  = 22.8 Hz), 105.4 (d,  $J_{\text{C-F}}$  = 24.5 Hz).

$^{19}\text{F}$  NMR (376 MHz,  $\text{CDCl}_3$ )  $\delta$ /ppm: -100.9.

HRMS (EI)  $m/z$ :  $[\text{M}]^+$  calcd for  $\text{C}_{19}\text{H}_9\text{FO}_4$ : 320.0485 found: 320.0464.

**2-((8-nitro-4-oxo-4H-chromen-3-yl)methylene)-1H-indene-1,3(2H)-dione **1k**.**

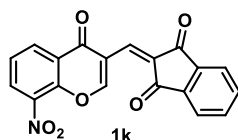

Following the **TP-A**, **1k** was obtained from 8-nitro-4-oxo-4H-chromene-3-carbaldehyde (1.1 g, 5.0 mmol), and 1H-indene-1,3(2H)-dione (0.73 g, 1.0 equiv.), CSA (0.23 g, 0.2 equiv.). The residue was filtered under a vacuum and obtain **1k** as a brown solid (1.3 g, 76%).  $R_f$  = 0.50 (Hexanes:EtOAc = 7:3) ; mp.: 249.3-250.8 °C.

$^1\text{H}$  NMR (400 MHz,  $\text{CDCl}_3$ )  $\delta$ /ppm: 10.40 (s, 1H), 7.54 (d,  $J$  = 8.1, 1.7 Hz, 1H), 7.54 (d,  $J$  = 8.2, 1.6 Hz, 1H), 8.31 (s, 1H), 8.08-8.01 (m, 2H), 7.92-7.82 (d, 2H), 7.62 (t,  $J$  = 7.9 Hz, 1H).

$^{13}\text{C}\{^1\text{H}\}$ -NMR (100 MHz,  $\text{CDCl}_3$ )  $\delta$ /ppm: 189.7, 188.6, 173.5, 162.3, 148.3, 142.2, 140.5, 139.2, 135.9, 135.7, 133.9, 132.3, 130.9, 130.3, 125.6, 125.5, 123.7, 123.6, 119.3.

HRMS (EI)  $m/z$ :  $[\text{M}]^+$  calcd for  $\text{C}_{19}\text{H}_9\text{NO}_6$ : 347.0430 found: 347.0423.

**2-((6,8-dimethyl-4-oxo-4H-chromen-3-yl)methylene)-1H-indene-1,3(2H)-dione 1l.**

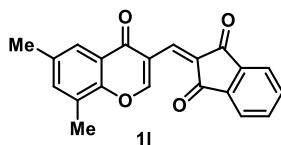

Following the **TP-A**, **1l** was obtained from 6,8-dimethyl-4-oxo-4H-chromene-3-carbaldehyde (1.0 g, 5.0 mmol), and 1H-indene-1,3(2H)-dione (0.73 g, 1.0 equiv.), CSA (0.23 g, 0.2 equiv.). The residue was filtered under a vacuum and obtain **1l** as a pale green solid (1.05 g, 64%).  $R_f = 0.45$  (Hexanes:EtOAc = 7:3) ; mp.: 296.6-297.8 °C.

$^1\text{H NMR}$  (400 MHz,  $\text{CDCl}_3$ )  $\delta$ /ppm: 10.41 (s, 1H), 8.46 (s, 1H), 8.06-7.98 (m, 2H), 7.94 (pd,  $J = 0.8$  Hz, 1H), 7.87-7.79 (m, 2H), 7.39 (pd,  $J = 0.9$  Hz, 1H), 2.51 (s, 3H), 2.44 (s, 3H).

$^{13}\text{C}\{^1\text{H}\}$ -NMR (100 MHz,  $\text{CDCl}_3$ )  $\delta$ /ppm: 190.3, 189.2, 175.7, 163.1, 152.9, 142.1, 140.3, 137.1, 136.8, 135.9, 135.5, 135.3, 128.9, 127.8, 127.6, 123.6, 123.5, 123.3, 118.2, 20.9, 15.3.

**HRMS** (EI)  $m/z$ :  $[\text{M}]^+$  calcd for  $\text{C}_{21}\text{H}_{14}\text{O}_4$ :330.0892 found: 330.0864.

**2-((6,8-dibromo-4-oxo-4H-chromen-3-yl)methylene)-1H-indene-1,3(2H)-dione 1m.**

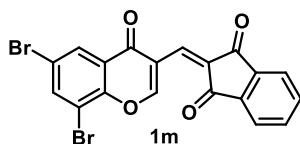

Following the **TP-A**, **1m** was obtained from 6,8-dibromo-4-oxo-4H-chromene-3-carbaldehyde (1.65 mg, 5.0 mmol), and 1H-indene-1,3(2H)-dione (0.73 g, 1.0 equiv.), CSA (0.23 g, 0.2 equiv.). The residue was filtered under a vacuum and obtain **1m** as a pale green solid (1.2 g, 55%).  $R_f = 0.50$  (Hexanes/EtOAc = 7: 3) ; mp: 302.5-303.6 °C.

$^1\text{H NMR}$  (400 MHz,  $\text{CDCl}_3$ )  $\delta$ /ppm: 10.41 (s, 1H), 8.39 (d,  $J = 2.5$  Hz, 1H, 1H), 8.33 (s, 1H), 8.09 (d,  $J = 2.2$  Hz, 1H), 8.07-8.00 (m, 2H), 7.90-7.82 (m, 2H).

$^{13}\text{C}\{^1\text{H}\}$ -NMR (100 MHz,  $\text{CDCl}_3$ )  $\delta$ /ppm: 189.9, 188.7, 173.7, 162.8, 151.9, 142.2, 140.4, 140.2, 135.8, 135.6, 134.6, 130.4, 128.6, 128.6, 125.9, 123.7, 123.6, 119.8, 118.7, 133.4.

**HRMS** (EI)  $m/z$ :  $[\text{M}]^+$  calcd for  $\text{C}_{19}\text{H}_8^{79}\text{Br}^{79}\text{Br O}_4$ : 457.8789 found: 457.8772.

**HRMS** (EI)  $m/z$ :  $[\text{M}]^+$  calcd for  $\text{C}_{19}\text{H}_8^{79}\text{Br}^{81}\text{Br O}_4$ : 459.8769 found: 459.8758.

**HRMS** (EI)  $m/z$ :  $[\text{M}]^+$  calcd for  $\text{C}_{19}\text{H}_8^{81}\text{Br}^{81}\text{Br O}_4$ : 461.8748 found: 461.8722.

**2-((1-oxo-1H-benzo[f]chromen-2-yl)methylene)-1H-indene-1,3(2H)-dione **1n**.**

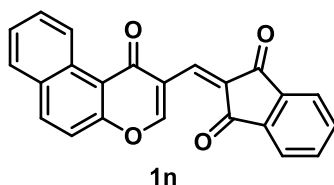

Following the **TP-A**, **1n** was obtained from 1-oxo-1H-benzo[f]chromene-2-carbaldehyde (1.1 g, 5.0 mmol), and 1H-indene-1,3(2H)-dione (0.73 g, 1.0 equiv.), CSA (0.23 g, 0.2 equiv.). The residue was filtered under a vacuum and obtain **1n** as a half-white solid (1.3 g, 76%).  $R_f = 0.38$  (Hexanes:EtOAc = 8:2) ; mp.: 297.4-298.5 °C.

$^1\text{H NMR}$  (400 MHz,  $\text{CDCl}_3$ )  $\delta$ /ppm: 10.56 (s, 1H), 8.61-8.53 (m, 1H), 8.49 (s, 1H), 8.24 (d,  $J = 8.7$  Hz, 1H), 8.09-8.01 (m, 2H), 8.00-7.93 (m, 1H), 7.89-7.82 (m, 3H), 7.78-7.69 (m, 2H).

$^{13}\text{C}\{^1\text{H}\}$ -NMR (100 MHz,  $\text{CDCl}_3$ )  $\delta$ /ppm: 190.2, 189.1, 176.7, 160.9, 157.4, 142.2, 140.4, 136.9, 136.4, 135.6, 135.4, 131.1, 130.6, 129.8, 129.6, 127.3, 127.2, 123.6, 123.4, 120.7, 117.5.

**HRMS** (EI)  $m/z$ :  $[\text{M}]^+$  calcd for  $\text{C}_{23}\text{H}_{12}\text{O}_4$ : 352.0736 found: 352.0741.

**2-((4-oxo-4H-benzo[h]chromen-3-yl)methylene)-1H-indene-1,3(2H)-dione **1o**.**

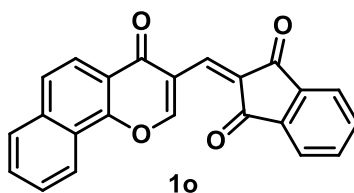

Following the **TP-A**, **1o** was obtained from 4-oxo-4H-benzo[h]chromene-3-carbaldehyde (1.1 g, 5.0 mmol), and 1H-indene-1,3(2H)-dione (0.73 g, 1.0 equiv.), CSA (0.23 g, 0.2 equiv.). The residue was filtered under a vacuum and obtain **1o** as a yellow solid (1.4 g, 80%).  $R_f = 0.47$  (Hexanes/EtOAc = 8:2) ; mp.: 287.3-288.2 °C.

$^1\text{H NMR}$  (400 MHz,  $\text{CDCl}_3$ )  $\delta$ /ppm: 10.56 (s, 1H), 8.61-8.53 (m, 1H), 8.58 (s, 1H), 8.25 (d,  $J = 8.7$  Hz, 1H), 8.81-8.01 (m, 2H), 7.99-7.93 (m, 1H), 7.87-7.82 (m, 3H), 7.79-7.69 (m, 2H).

$^{13}\text{C}\{^1\text{H}\}$ -NMR (100 MHz,  $\text{CDCl}_3$ )  $\delta$ /ppm: 190.2, 188.9, 175.1, 162.3, 153.6, 142.2, 140.4, 136.3, 136.2, 135.6, 135.4, 129.8, 129.7, 128.2, 127.6, 126.4, 123.9, 123.6, 123.4, 122.3, 121.3, 120.4, 119.7.

**HRMS** (EI)  $m/z$ :  $[\text{M}]^+$  calcd for  $\text{C}_{23}\text{H}_{12}\text{O}_4$ : 352.0736 found: 352.0719.



**2-((5-hydroxy-4-oxo-4H-chromen-3-yl)methylene)-1H-indene-1,3(2H)-dione **1p**.**

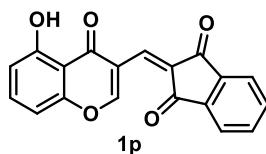

Following the **TP-A**, **1p** was obtained from 5-hydroxy-4-oxo-4H-chromene-3-carbaldehyde (0.95 g, 5.0 mmol), and 1H-indene-1,3(2H)-dione (0.73 g, 1.0 equiv.), CSA (0.23 g, 0.2 equiv.). The residue was filtered under a vacuum and obtain **1p** as a yellow solid (1.2 g, 75%).  $R_f = 0.43$  (Hexanes:EtOAc = 7:3); mp.: 249.1-250.2 °C.

$^1\text{H NMR}$  (400 MHz,  $\text{CDCl}_3$ )  $\delta$ /ppm: 12.31 (s, 1H), 10.38 (s, 1H), 8.31 (s, 1H), 8.13-7.97 (m, 2H) 7.90-7.77 (m, 2H), 7.60 (t,  $J = 8.3$  Hz, 1H), 7.01 (pd,  $J = 8.4, 0.6$  Hz, 1H), 6.89 (pd,  $J = 8.4, 0.6$  Hz, 1H).

$^{13}\text{C}\{^1\text{H}\}$ -NMR (100 MHz,  $\text{CDCl}_3$ )  $\delta$ /ppm: 190.1, 188.8, 180.6, 164.2, 161.5, 156.1, 142.1, 140.4, 136.4, 135.7, 135.5, 134.3, 129.6, 123.6, 123.5, 117.3, 112.9, 110.7, 107.7.

**HRMS** (EI)  $m/z$ :  $[\text{M}]^+$  calcd for  $\text{C}_{21}\text{H}_{10}\text{O}_5$ : 318.0528 found: 318.0517.

**5,6-dimethoxy-2-((4-oxo-4H-chromen-3-yl)methylene)-1H-indene-1,3(2H)-dione **1q**.**

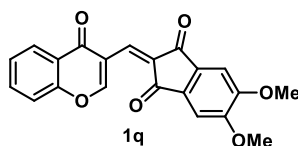

Following the **TP-A**, **1q** was obtained from 4-oxo-4H-chromene-3-carbaldehyde (0.87 g, 5.0 mmol), and 5,6-dimethoxy-1H-indene-1,3(2H)-dione (1.03 g, 5.0 mmol.), CSA (0.23 g, 0.2 equiv.). The residue was filtered under a vacuum and obtain **1q** as a yellow solid (1.2 g, 68%).  $R_f = 0.49$  (Hexanes:EtOAc = 5:5); mp.: 271.7-272.8 °C.

$^1\text{H NMR}$  (400 MHz,  $\text{CDCl}_3$ )  $\delta$ /ppm: 10.28 (s, 1H), 8.33 (d,  $J = 7.8$  Hz, 1H), 8.26 (s, 1H), 7.74 (t,  $J = 8.3$  Hz, 1H), 7.56 (d,  $J = 8.5$  Hz, 1H), 7.48 (t,  $J = 7.8$  Hz, 1H), 7.04 (d,  $J = 11.4$  Hz, 1H), 7.33 (s, 2H), 4.03 (s, 6H).

$^{13}\text{C}\{^1\text{H}\}$ -NMR (100 MHz,  $\text{CDCl}_3$ )  $\delta$ /ppm: 196.6, 162.7, 155.9, 138.4, 134.3, 133.1, 126.6, 126.2, 118.6, 118.5, 103.9, 103.8, 103.2, 56.7, 44.7.

**HRMS** (EI)  $m/z$ :  $[\text{M}]^+$  calcd for  $\text{C}_{21}\text{H}_{14}\text{O}_6$ : 362.0790 found: 362.0775.

### 2-((4-oxo-4H-chromen-3-yl)methylene)-1,3-diphenylpropane-1,3-dione **6**.

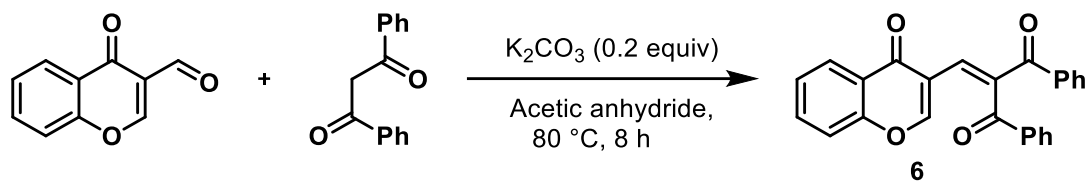

Following the reported procedure,<sup>3</sup> A 50 mL round-bottomed flask equipped with a magnetic stir bar was charged with 4-oxo-4H-chromene-3-carbaldehyde (0.87 g, 5.0 mmol.), 1,3-diphenylpropane-1,3-dione (1.6 g, 1.5 equiv.),  $K_3CO_3$  (0.69 g, 0.2 equiv.) and acetic anhydride (30.0 mL). The reaction mixture was stirred for 8 h at  $80\text{ }^\circ\text{C}$ . After completion of the reaction, the residue was purified by column chromatography ( $SiO_2$ , Hexanes:EtOAc = 65:35) to give **6** as a half-white solid (1.45 g, 76%).  $R_f = 0.45$  (Hexanes:EtOAc = 7:3); mp.:  $177.0\text{-}178.1\text{ }^\circ\text{C}$ .

$^1\text{H NMR}$  (400 MHz,  $CDCl_3$ )  $\delta$ /ppm: 8.26 (d,  $J = 0.7$  Hz, 1H), 8.17 (d,  $J = 8.2, 1.8$  Hz, 1H), 8.00-7.91 (m, 4H), 7.68 (d,  $J = 0.9$  Hz, 1H), 7.67-7.56 (m, 2H), 7.55-7.47 (m, 3H), 7.45-7.36 (m, 4H).

$^{13}\text{C}\{^1\text{H}\}$ -NMR (100 MHz,  $CDCl_3$ )  $\delta$ /ppm: 190.1, 188.8, 180.6, 164.2, 161.5, 156.1, 142.1, 140.4, 136.4, 135.7, 135.5, 134.3, 129.6, 123.6, 123.5, 117.3, 112.9, 110.7, 107.7.

HRMS (EI)  $m/z$ :  $[M]^+$  calcd for  $C_{25}H_{16}O_4$ : 380.1049 found: 380.1068.

### 11-(tributyl- $\lambda^5$ -phosphanylidene)-10H-benzo[5,6]pentaleno[1,2-b]chromene-10,12(11H)-dione **3a**.

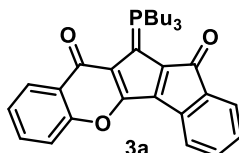

Following the TP-B, **3a** was obtained from 2-((4-oxo-4H-chromen-3-yl)methylene)-1H-indene-1,3(2H)-dione **1a** (90.75 mg, 0.3 mmol),  $PBu_3$  (88.8  $\mu\text{L}$ , 1.2 equiv.), benzoyl chloride **2a** (104.5  $\mu\text{L}$ , 3.0 equiv.) and  $Et_3N$  (150.5  $\mu\text{L}$ , 3.6 equiv.) in anhydrous  $CH_2Cl_2$  (1.5 mL) at  $30\text{ }^\circ\text{C}$  for 8 h. After workup, the residue was purified by column chromatography ( $SiO_2$ , Hexanes:EtOAc = 70:30) to give **3a** as a dark red solid (135.0 mg, 92%).  $R_f = 0.30$  (Hexanes:EtOAc = 9:1); mp.:  $184.2\text{-}185.1\text{ }^\circ\text{C}$ .

$^1\text{H NMR}$  (400 MHz,  $CDCl_3$ )  $\delta$ /ppm: 8.23 (dd,  $J = 7.9, 1.9$  Hz 1H), 7.57 (dtd,  $J = 9.0, 7.0, 1.7$ , Hz 1H), 7.46-7.44 (m, 1H), 7.33 (d,  $J = 7.2$  Hz 1H), 7.29-7.25 (m, 1H), 6.94-6.88 (m, 1H), 2.73-2.54 (m, 6H), 1.48-1.44 (m, 12H), 0.93-0.89 (t,  $J = 8.0$  Hz, 9H).

$^{13}\text{C}\{^1\text{H}\}$ -NMR (100 MHz,  $CDCl_3$ )  $\delta$ /ppm: 189.7, 174.2, 156.3, 146.1 (d,  $^2J_{C-P} = 12.4$  Hz), 141.3, 139.3, 134.4, (d,  $^3J_{C-P} = 9.4$  Hz), 133.8, 132.3, 126.1, 124.7, 123.3, 122.8, 122.6 (d,  $^2J_{C-P} = 10.5$  Hz), 122.5, 122.3, (d,  $^3J_{C-P} = 12.7$  Hz), 118.9, 117.5, 82.8, (d,  $^1J_{C-P} = 102.9$  Hz), 24.1, (d,  $^3J_{C-P} = 4.0$  Hz), 23.8, (d,  $^2J_{C-P} = 16.0$  Hz), 21.3, (d,  $^1J_{C-P} = 52.3$

Hz), 13.5.

$^{31}\text{P}$  NMR (162 MHz,  $\text{CDCl}_3$ )  $\delta$ /ppm: 22.0.

HRMS (EI)  $m/z$ :  $[\text{M}]^+$  calcd for  $\text{C}_{31}\text{H}_{35}\text{O}_3\text{P}$ : 486.2324 found: 486.2310.

**8-methyl-11-(tributyl- $\lambda^5$ -phosphanylidene)-10H-benzo[5,6]pentaleno[1,2-b]chromene-10,12(11H)-dione **3b**.**

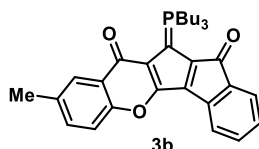

Following the **TP-B**, **3b** was obtained from 2-((6-methyl-4-oxo-4H-chromen-3-yl)methylene)-1H-indene-1,3(2H)-dione **1b** (94.89 mg, 0.3 mmol),  $\text{PBu}_3$  (88.8  $\mu\text{L}$ , 1.2 equiv.), **2a** (104.5  $\mu\text{L}$ , 3.0 equiv.), and  $\text{Et}_3\text{N}$  (150.5  $\mu\text{L}$ , 3.6 equiv.) in anhydrous  $\text{CH}_2\text{Cl}_2$  (1.5 mL) at 30 °C for 48 h. After workup, the residue was purified by column chromatography ( $\text{SiO}_2$ , Hexanes:EtOAc = 70:30) to give **3b** as a dark red solid (138.0 mg, 90%).  $R_f$  = 0.45 (Hexanes:EtOAc = 8:2); mp.: 179.9-181.1 °C.

$^1\text{H}$  NMR (400 MHz,  $\text{CDCl}_3$ )  $\delta$ /ppm: 8.03 (s, 1H), 7.40-7.30 (m, 3H), 7.28-7.20 (m, 2H), 6.95-6.85 (m, 1H), 2.70-2.58 (m, 6H), 2.43 (s, 3H), 1.53-1.39 (m, 12H), 0.92 (t,  $J$  = 6.7 Hz, 9H).

$^{13}\text{C}\{^1\text{H}\}$ -NMR (100 MHz,  $\text{CDCl}_3$ )  $\delta$ /ppm: 189.6, 174.3, 154.5, 146.3 (d,  $^2J_{\text{C-P}}$  = 11.9 Hz), 141.3, 139.2, 139.1, 135.4 (d,  $^3J_{\text{C-P}}$  = 9.7 Hz), 133.8, 133.4, 132.0, 125.6, 124.5, 123.2, 122.4 (d,  $^3J_{\text{C-P}}$  = 10.6 Hz), 122.3 (d,  $^2J_{\text{C-P}}$  = 11.2 Hz), 121.2, 118.9, 117.2, 82.0 (d,  $^1J_{\text{C-P}}$  = 104.2 Hz), 24.1 (d,  $^3J_{\text{C-P}}$  = 3.9 Hz), 23.7 (d,  $^2J_{\text{C-P}}$  = 15.7 Hz), 21.5 (d,  $^1J_{\text{C-P}}$  = 52.7 Hz), 20.7, 13.5.

$^{31}\text{P}$  NMR (162 MHz,  $\text{CDCl}_3$ )  $\delta$ /ppm: 22.0.

HRMS (EI)  $m/z$ :  $[\text{M}]^+$  calcd for  $\text{C}_{32}\text{H}_{37}\text{O}_3\text{P}$ : 500.2480 found: 500.2462.

**8-methoxy-11-(tributyl- $\lambda^5$ -phosphanylidene)-10H-benzo[5,6]pentaleno[1,2-b]chromene-10,12(11H)-dione **3c**.**

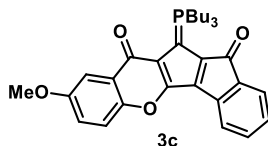

Following the **TP-B**, **3c** was obtained from 2-((6-methoxy-4-oxo-4H-chromen-3-yl)methylene)-1H-indene-1,3(2H)-dione **1c** (99.69 mg, 0.3 mmol),  $\text{PBu}_3$  (88.8  $\mu\text{L}$ , 1.2 equiv.), benzoyl chloride **2a** (104.5  $\mu\text{L}$ , 3.0 equiv.), and  $\text{Et}_3\text{N}$  (150.5  $\mu\text{L}$ , 3.6 equiv.) in anhydrous  $\text{CH}_2\text{Cl}_2$  (1.5 mL) at 30 °C for 24 h. After workup, the residue was purified by column chromatography ( $\text{SiO}_2$ , Hexanes:EtOAc = 70:30) to give **3c** as a dark red

solid (114.5 mg, 73%).  $R_f = 0.45$  (Hexanes:EtOAc = 8:2); mp.: 115.3-116.2 °C.

$^1\text{H NMR}$  (400 MHz,  $\text{CDCl}_3$ )  $\delta/\text{ppm}$ : 7.65 (d,  $J = 3.2$  Hz, 1H), 7.38 (d,  $J = 9.1$ , 1H), 7.31 (d,  $J = 7.3$  Hz, 1H), 7.28-7.21 (m, 1H), 7.18 (dd,  $J = 9.1, 3.2$  Hz, 1H), 6.94-6.86 (m, 1H), 2.75-2.53 (m, 6H), 1.55-1.37 (m, 12H), 0.91 (t,  $J = 6.7$  Hz, 9H).

$^{13}\text{C}\{^1\text{H}\}$ -NMR (100 MHz,  $\text{CDCl}_3$ )  $\delta/\text{ppm}$ : 189.7, 173.9, 155.2, 151.1, 146.5 (d,  $^2J_{\text{C-P}} = 12.1$  Hz), 141.4, 139.2, 134.6 (d,  $^3J_{\text{C-P}} = 9.9$  Hz), 133.8, 124.6, 123.2, 122.9, 122.4 (d,  $^3J_{\text{C-P}} = 10.4$  Hz), 122.1 (d,  $^2J_{\text{C-P}} = 12.3$  Hz), 121.9, 118.9, 118.7, 105.9, 81.6 (d,  $^1J_{\text{C-P}} = 103.3$  Hz), 55.8, 24.2 (d,  $^3J_{\text{C-P}} = 3.8$  Hz), 23.8 (d,  $^2J_{\text{C-P}} = 15.8$  Hz), 21.5 (d,  $^1J_{\text{C-P}} = 52.8$  Hz), 13.5.

$^{31}\text{P NMR}$  (162 MHz,  $\text{CDCl}_3$ )  $\delta/\text{ppm}$ : 21.9.

HRMS (EI)  $m/z$ :  $[\text{M}]^+$  calcd for  $\text{C}_{32}\text{H}_{37}\text{O}_4\text{P}$ : 516.2429 found: 516.2454.

**8-fluoro-11-(tributyl- $\lambda^5$ -phosphanylidene)-10H-benzo[5,6]pentaleno[1,2-b]chromene-10,12(11H)-dione **3d**.**

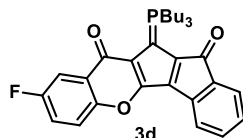

Following the **TP-B**, **3d** was obtained from 2-((6-fluoro-4-oxo-4H-chromen-3-yl)methylene)-1H-indene-1,3(2H)-dione **1d** (96.01 mg, 0.3 mmol),  $\text{PBU}_3$  (88.8  $\mu\text{L}$ , 1.2 equiv.), benzoyl chloride **2a** (104.5  $\mu\text{L}$ , 3.0 equiv.), and  $\text{Et}_3\text{N}$  (150.5  $\mu\text{L}$ , 3.6 equiv.) in anhydrous  $\text{CH}_2\text{Cl}_2$  (1.5 mL) at 30 °C for 8 h. After workup, the residue was purified by column chromatography ( $\text{SiO}_2$ , Hexanes:EtOAc = 70:30) to give **3d** as a dark red solid (135.0 mg, 89%).  $R_f = 0.46$  (Hexanes:EtOAc = 9:1); mp.: 169.7-170.5 °C

$^1\text{H NMR}$  (400 MHz,  $\text{CDCl}_3$ )  $\delta/\text{ppm}$ : 7.87 (dd,  $J = 9.0, 3.1$  Hz, 1H), 7.43 (dd,  $J = 9.1, 4.3$  Hz, 1H), 7.34 (d,  $J = 7.4$  Hz, 1H), 7.3-7.28 (m, 1H), 7.3-7.2 (m, 1H), 6.94-6.90 (td,  $J = 6.9, 2.0$  Hz, 1H), 2.80-2.52 (m, 6H), 1.55-1.37 (m, 12H), 0.92 (t,  $J = 6.9$  Hz, 9H).

$^{13}\text{C}\{^1\text{H}\}$ -NMR (100 MHz,  $\text{CDCl}_3$ )  $\delta/\text{ppm}$ : 189.7, 173.2, 159.5, 157.1, 152.4, 146.2, , (d,  $^2J_{\text{C-P}} = 12.0$  Hz), 141.2, 139.1, 134.9, (d,  $^3J_{\text{C-P}} = 9.6$  Hz), 133.9, 124.8, 123.7, (d,  $J_{\text{C-F}} = 6.7$  Hz), 123.4, 122.3, (d,  $^3J_{\text{C-P}} = 10.6$  Hz), 121.5, (d,  $^2J_{\text{C-P}} = 12.2$  Hz), 120.0 (d,  $J_{\text{C-F}} = 25.2$  Hz), 119.8, 119.0, 118.9, 111.0 (d,  $J_{\text{C-F}} = 23.7$  Hz), 81.1 (d,  $^1J_{\text{C-P}} = 103.0$  Hz), 24.1 (d,  $^3J_{\text{C-P}} = 3.9$  Hz), 23.8 (d,  $^2J_{\text{C-P}} = 15.8$  Hz), 21.4, (d,  $^1J_{\text{C-P}} = 52.5$  Hz), 13.5.

$^{31}\text{P NMR}$  (162 MHz,  $\text{CDCl}_3$ )  $\delta/\text{ppm}$ : 22.1.

$^{19}\text{F NMR}$  (376 MHz,  $\text{CDCl}_3$ )  $\delta/\text{ppm}$ : -119.9.

HRMS (EI)  $m/z$ :  $[\text{M}]^+$  calcd for  $\text{C}_{31}\text{H}_{34}\text{O}_3\text{PF}$ : 504.2230 found: 504.2198.

**8-chloro-11-(tributyl- $\lambda^5$ -phosphanlydene)-10H-benzo[5,6]pentaleno[1,2-b]chromene-10,12(11H)-dione 3e.**

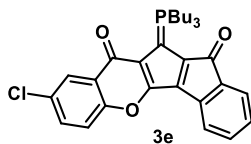

Following the **TP-B**, **3e** was obtained from 2-((6-chloro-4-oxo-4H-chromen-3-yl)methylene)-1H-indene-1,3(2H)-dione **1e** (101.02 mg, 0.3 mmol), PBu<sub>3</sub> (88.8  $\mu$ L, 1.2 equiv.), benzoyl chloride **2a** (104.5  $\mu$ L, 3.0 equiv.), and Et<sub>3</sub>N (150.5  $\mu$ L, 3.6 equiv.) in anhydrous CH<sub>2</sub>Cl<sub>2</sub> (1.5 mL) at 30 °C for 8 h. After workup, the residue was purified by column chromatography (SiO<sub>2</sub>, Hexanes:EtOAc = 70:30) to give **3e** as a dark red solid (141.2 mg, 90%). *R<sub>f</sub>* = 0.55 (Hexanes:EtOAc = 9:1); mp.: 161.7-162.8 °C.

<sup>1</sup>H NMR (400 MHz, CDCl<sub>3</sub>)  $\delta$ /ppm: 8.20 (d, *J* = 2.6 Hz, 1H), 7.50 (dd, *J* = 8.9, 2.6 Hz, 1H), 7.4 (d, *J* = 8.8 Hz, 1H), 7.33 (d, *J* = 7.2 Hz, 1H), 6.90 (td, *J* = 7.2, 1.7 Hz, 1H), 2.70-2.55 (m, 6H), 1.54-1.37 (m, 12H), 0.92 (t, *J* = 6.9 Hz, 9H).

<sup>13</sup>C{<sup>1</sup>H}-NMR (100 MHz, CDCl<sub>3</sub>)  $\delta$ /ppm: 189.6, 172.8, 154.6, 146.1 (d, <sup>2</sup>*J*<sub>C-P</sub> = 12.7 Hz), 141.2, 139.1, 135.0 (d, <sup>3</sup>*J*<sub>C-P</sub> = 9.6 Hz), 133.9, 132.1, 128.1, 125.7, 124.8, 123.9, 123.4, 122.4 (d, <sup>3</sup>*J*<sub>C-P</sub> = 10.8 Hz), 121.7 (d, <sup>2</sup>*J*<sub>C-P</sub> = 12.3 Hz), 119.1, 119.0, 82.5 (d, <sup>1</sup>*J*<sub>C-P</sub> = 102.7 Hz), 24.1 (d, <sup>3</sup>*J*<sub>C-P</sub> = 4.1 Hz), 23.7 (d, <sup>2</sup>*J*<sub>C-P</sub> = 15.7 Hz), 21.7 (d, <sup>1</sup>*J*<sub>C-P</sub> = 52.8 Hz), 13.5.

<sup>31</sup>P NMR (162 MHz, CDCl<sub>3</sub>)  $\delta$ /ppm: 22.2.

HRMS (EI) *m/z*: [M]<sup>+</sup> calcd for C<sub>31</sub>H<sub>34</sub>O<sub>3</sub>P<sup>35</sup>Cl: 520.1934 found: 520.1919.

HRMS (EI) *m/z*: [M]<sup>+</sup> calcd for C<sub>31</sub>H<sub>34</sub>O<sub>3</sub>P<sup>37</sup>Cl: 522.1905 found: 522.1904.

**8-bromo-11-(tributyl- $\lambda^5$ -phosphanlydene)-10H-benzo[5,6]pentaleno[1,2-b]chromene-10,12(11H)-dione 3f.**

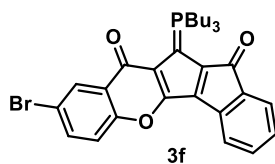

Following the **TP-B**, **3f** was obtained from 2-((6-bromo-4-oxo-4H-chromen-3-yl)methylene)-1H-indene-1,3(2H)-dione **1f** (114.4 mg, 0.3 mmol), PBu<sub>3</sub> (88.8  $\mu$ L, 1.2 equiv.), benzoyl chloride **2a** (104.5  $\mu$ L, 3.0 equiv.), and Et<sub>3</sub>N (150.5  $\mu$ L, 3.6 equiv.) in anhydrous CH<sub>2</sub>Cl<sub>2</sub> (1.5 mL) at 30 °C for 8 h. After workup, the residue was purified by column chromatography (SiO<sub>2</sub>, Hexanes:EtOAc = 70:30) to give **3f** as a dark red solid (148.2 mg, 87%). *R<sub>f</sub>* = 0.50 (Hexanes:EtOAc = 8:2); mp.: 170.3-171.2 °C.

<sup>1</sup>H NMR (400 MHz, CDCl<sub>3</sub>)  $\delta$ /ppm: 8.36 (d, *J* = 2.5 Hz, 1H), 7.63 (dd, *J* = 8.8, 2.6 Hz, 1H), 7.35-7.34 (m, 1H), 7.33 (s, 1H), 6.94-6.90 (td, *J* = 14.1, 7.1 Hz, 1H), 2.71-2.53 (m,

6H), 1.54-1.36 (m, 12H), 0.92 (t,  $J = 6.9$  Hz, 9H).

$^{13}\text{C}\{^1\text{H}\}$ -NMR (100 MHz,  $\text{CDCl}_3$ )  $\delta/\text{ppm}$ : 189.6, 172.7, 155.0, 145.9 (d,  $^2J_{\text{C-P}} = 11.6$  Hz), 141.1, 139.1, 135.0 (d,  $^3J_{\text{C-P}} = 9.4$  Hz), 134.9, 133.9, 128.8, 124.3, 124.3, 123.4, 122.4 (d,  $^2J_{\text{C-P}} = 10.5$  Hz), 121.6 (d,  $^3J_{\text{C-P}} = 11.93$  Hz), 119.3, 119.1, 115.5, 83.1 (d,  $^1J_{\text{C-P}} = 101.8$  Hz), 24.1 (d,  $^3J_{\text{C-P}} = 3.8$  Hz), 23.8 (d,  $^2J_{\text{C-P}} = 15.4$  Hz), 21.4 (d,  $^1J_{\text{C-P}} = 52.7$  Hz), 13.5.

$^{31}\text{P}$  NMR (162 MHz,  $\text{CDCl}_3$ )  $\delta/\text{ppm}$ : 22.2.

HRMS (EI)  $m/z$ :  $[\text{M}]^+$  calcd for  $\text{C}_{31}\text{H}_{34}\text{O}_3\text{P}^{79}\text{Br}$ : 564.1429 found: 564.1411.

HRMS (EI)  $m/z$ :  $[\text{M}]^+$  calcd for  $\text{C}_{31}\text{H}_{34}\text{O}_3\text{P}^{81}\text{Br}$ : 566.1408 found: 566.1397.

**8-nitro-11-(tributyl- $\lambda^5$ -phosphanylidene)-4c,10a,11,11a-tetrahydro-10H-benzo[5,6]pentaleno[1,2-b]chromene-10,12(4bH)-dione **3g**.**

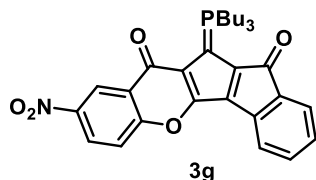

Following the **TP-B**, **3g** was obtained from 2-((6-nitro-4-oxo-4H-chromen-3-yl)methylene)-1H-indene-1,3(2H)-dione **1g** (104.18 mg, 0.3 mmol),  $\text{PBU}_3$  (88.8  $\mu\text{L}$ , 1.2 equiv.), benzoyl chloride **2a** (104.5  $\mu\text{L}$ , 3.0 equiv.), and  $\text{Et}_3\text{N}$  (150.5  $\mu\text{L}$ , 3.6 equiv.) in anhydrous  $\text{CH}_2\text{Cl}_2$  (1.5 mL) at 30 °C for 8 h. After workup, the residue was purified by column chromatography ( $\text{SiO}_2$ , Hexanes:  $\text{EtOAc} = 70:30$ ) to give **3g** as a dark red solid (128.0 mg, 80%).  $R_f = 0.50$  (Hexanes:  $\text{EtOAc} = 8:2$ ); mp.: 212.5-213.6 °C.

$^1\text{H}$  NMR (400 MHz,  $\text{CDCl}_3$ )  $\delta/\text{ppm}$ : 9.15 (d,  $J = 2.8$  Hz, 1H), 8.40 (dd,  $J = 9.1, 2.9$  Hz, 1H), 7.54 (d,  $J = 9.2$  Hz, 1H), 7.36 (d,  $J = 7.4$  Hz, 1H), 7.34-7.24 (m, 1H), 6.97 (td,  $J = 7.3, 1.2$  Hz, 1H), 2.76-2.56 (m, 6H), 1.57-1.39 (m, 12H), 0.93 (t,  $J = 6.8$  Hz, 9H).

$^{13}\text{C}\{^1\text{H}\}$ -NMR (100 MHz,  $\text{CDCl}_3$ )  $\delta/\text{ppm}$ : 189.5, 172.0, 159.4, 146.3 (d,  $^2J_{\text{C-P}} = 11.7$  Hz), 143.1, 140.7, 139.1, 135.3 (d,  $^3J_{\text{C-P}} = 9.4$  Hz), 134.1, 126.6, 125.2, 123.6, 123.3, 122.9, 122.7 (d,  $^3J_{\text{C-P}} = 10.4$  Hz), 121.2 (d,  $^2J_{\text{C-P}} = 12.3$  Hz), 119.3, 118.6, 83.5 (d,  $^1J_{\text{C-P}} = 102.2$  Hz), 24.1 (d,  $^3J_{\text{C-P}} = 4.0$  Hz), 23.3 (d,  $^2J_{\text{C-P}} = 15.8$  Hz), 21.7 (d,  $^3J_{\text{C-P}} = 52.3$  Hz), 13.5.

$^{31}\text{P}$  NMR (162 MHz,  $\text{CDCl}_3$ )  $\delta/\text{ppm}$ : 22.7.

HRMS (EI)  $m/z$ :  $[\text{M}]^+$  calcd for  $\text{C}_{31}\text{H}_{34}\text{NO}_5\text{P}$ : 531.2175 found: 531.2171.

**7-methyl-11-(tributyl- $\lambda^5$ -phosphanylidene)-10H-benzo[5,6]pentaleno[1,2-b]chromene-10,12(11H)-dione **3h**.**

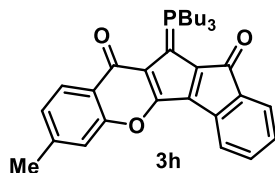

Following the **TP-B**, **3h** was obtained from 2-((7-methyl-4-oxo-4H-chromen-3-yl)methylene)-1H-indene-1,3(2H)-dione **1h** (94.89 mg, 0.3 mmol),  $\text{PBu}_3$  (88.8  $\mu\text{L}$ , 1.2 equiv.), benzoyl chloride **2a** (104.5  $\mu\text{L}$ , 3.0 equiv.), and  $\text{Et}_3\text{N}$  (150.5  $\mu\text{L}$ , 3.6 equiv.) in anhydrous  $\text{CH}_2\text{Cl}_2$  (1.5 mL) at 30 °C for 48 h. After workup, the residue was purified by column chromatography ( $\text{SiO}_2$ , Hexanes:EtOAc = 70:30) to give **3h** as a dark red solid (113.5 mg, 75%).  $R_f$  = 0.48 (Hexanes:EtOAc = 8:2); mp.: 157.2-158.2 °C.

$^1\text{H NMR}$  (400 MHz,  $\text{CDCl}_3$ )  $\delta$ /ppm: 8.11 (d,  $J$  = 8.1 Hz, 1H), 7.32 (d,  $J$  = 7.2 Hz 1H), 7.28-7.20 (m, 3H), 7.09 (d,  $J$  = 8.1 Hz, 1H), 6.96-6.85 (m, 1H), 2.74-2.55 (m, 6H), 2.47 (s, 3H), 1.55-1.36 (m, 12H), 0.91 (t,  $J$  = 6.8 Hz, 9H).

$^{13}\text{C}\{^1\text{H}\}$ -NMR (100 MHz,  $\text{CDCl}_3$ )  $\delta$ /ppm: 189.6, 174.3, 156.4, 146.1 (d,  $^3J_{\text{C-P}}$  = 12.2 Hz), 143.3, 141.4, 141.3, 139.3, 134.0 (d,  $^2J_{\text{C-P}}$  = 9.9 Hz), 133.7, 125.8, 124.6, 123.9, 123.2, 122.6 (d,  $^2J_{\text{C-P}}$  = 10.3 Hz), 122.3 (d,  $^3J_{\text{C-P}}$  = 12.2 Hz), 120.4 118.9, 117.4, 82.2 (d,  $^1J_{\text{C-P}}$  = 103.7 Hz), 24.1 (d,  $^3J_{\text{C-P}}$  = 3.8 Hz), 23.8 (d,  $^2J_{\text{C-P}}$  = 15.6 Hz), 21.7 (d,  $^1J_{\text{C-P}}$  = 52.9 Hz), 21.2, 13.5.

$^{31}\text{P NMR}$  (162 MHz,  $\text{CDCl}_3$ )  $\delta$ /ppm: 21.9.

HRMS (EI)  $m/z$ :  $[\text{M}]^+$  calcd for  $\text{C}_{32}\text{H}_{37}\text{O}_3\text{P}$ : 500.2480 found: 500.2492.

### 7-methoxy-11-(tributyl- $\lambda^5$ -phosphanylidene)-10H-benzo[5,6]pentaleno[1,2-b]chromene-10,12(11H)-dione **3i**.

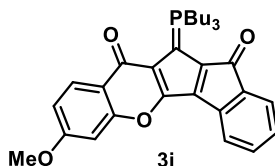

Following the **TP-B**, **3i** was obtained from 2-((7-methoxy-4-oxo-4H-chromen-3-yl)methylene)-1H-indene-1,3(2H)-dione **1i** (99.69 mg, 0.3 mmol),  $\text{PBu}_3$  (88.8  $\mu\text{L}$ , 1.2 equiv.), benzoyl chloride **2a** (104.5  $\mu\text{L}$ , 3.0 equiv.), and  $\text{Et}_3\text{N}$  (150.5  $\mu\text{L}$ , 3.6 equiv.) in anhydrous  $\text{CH}_2\text{Cl}_2$  (1.5 mL) at 30 °C for 24 h. After workup, the residue was purified by column chromatography ( $\text{SiO}_2$ , Hexanes:EtOAc = 75:25) to give **3i** as a dark red solid (109.0 mg, 70%).  $R_f$  = 0.38 (Hexanes:EtOAc = 8:2); mp.: 152.9-153.8 °C.

$^1\text{H NMR}$  (400 MHz,  $\text{CDCl}_3$ )  $\delta$ /ppm: 8.13 (d,  $J$  = 8.8 Hz, 1H), 7.32 (d,  $J$  = 7.1 Hz 1H), 7.26-7.21 (m, 3H), 6.96-6.80 (m, 3H), 3.91 (s, 3H), 2.7-2.55 (m, 6H), 1.53-1.37 (m, 12H), 0.91 (t,  $J$  = 6.7 Hz, 9H).

$^{13}\text{C}\{^1\text{H}\}$ -NMR (100 MHz,  $\text{CDCl}_3$ )  $\delta$ /ppm: 189.5, 174.1, 163.3, 158.0, 146.1 (d,  $^3J_{\text{C-P}}$  = 12.1 Hz), 141.3, 139.4, 133.6, 133.4 (d,  $^2J_{\text{C-P}}$  = 9.8 Hz), 127.4, 124.6, 123.2, 122.6 (d,

$^2J_{C-P}$  = 10.5 Hz), 122.2 (d,  $^3J_{C-P}$  = 12.1 Hz), 118.9, 116.6, 111.5, 100.2, 82.2 (d,  $^1J_{C-P}$  = 103.3 Hz), 55.7, 24.2 (d,  $^3J_{C-P}$  = 3.4 Hz), 23.8 (d,  $^2J_{C-P}$  = 15.8 Hz), 21.5 (d,  $^1J_{C-P}$  = 53.1 Hz).

$^{31}\text{P}$  NMR (162 MHz,  $\text{CDCl}_3$ )  $\delta$ /ppm: 22.0.

HRMS (EI)  $m/z$ :  $[\text{M}]^+$  calcd for  $\text{C}_{32}\text{H}_{37}\text{O}_4\text{P}$ : 516.2429 found: 516.2416.

**7-fluoro-11-(tributyl- $\lambda^5$ -phosphanylidene)-10H-benzo[5,6]pentaleno[1,2-b]chromene-10,12(11H)-dione 3j.**

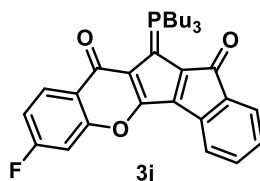

Following the **TP-B**, **3j** was obtained from 2-((7-fluoro-4-oxo-4H-chromen-3-yl)methylene)-1H-indene-1,3(2H)-dione **1j** (96.08 mg, 0.3 mmol),  $\text{PBu}_3$  (88.8  $\mu\text{L}$ , 1.2 equiv.), benzoyl chloride **2a** (104.5  $\mu\text{L}$ , 3.0 equiv.), and  $\text{Et}_3\text{N}$  (150.5  $\mu\text{L}$ , 3.6 equiv.) in anhydrous  $\text{CH}_2\text{Cl}_2$  (1.5 mL) at 30 °C for 24 h. After workup, the residue was purified by column chromatography ( $\text{SiO}_2$ , Hexanes:EtOAc = 70:30) to give **3j** as a dark red solid (132.1 mg, 87%).  $R_f$  = 0.50 (Hexanes:EtOAc = 8:2); mp.: 150.9-151.8 °C.

$^1\text{H}$  NMR (400 MHz,  $\text{CDCl}_3$ )  $\delta$ /ppm: 8.23 (dd,  $J$  = 8.9, 6.6 Hz, 1H), 7.33 (d,  $J$  = 7.3 Hz, 1H), 7.30-7.20 (m, 2H), 6.96 (dd,  $J$  = 9.6, 2.4 Hz, 1H), 7.99 (td,  $J$  = 8.2, 2.4 Hz, 1H), 6.92 (td,  $J$  = 7.1, 1.6 Hz, 1H), 2.76-2.53 (m, 6H), 1.58-1.36 (m, 12H), 0.92 (t,  $J$  = 6.8 Hz, 9H).

$^{13}\text{C}\{^1\text{H}\}$ -NMR (100 MHz,  $\text{CDCl}_3$ )  $\delta$ /ppm: 189.5, 173.4, 166.3, 163.8, 157.3 (d,  $J_{C-F}$  = 13.2 Hz), 146.1 (d,  $^3J_{C-P}$  = 11.8 Hz), 141.1, 139.2, 134.2 (d,  $^2J_{C-P}$  = 9.7 Hz), 133.8, 128.3 (d,  $J_{C-F}$  = 10.6 Hz), 124.8, 123.3, 122.5 (d,  $^2J_{C-P}$  = 10.8 Hz), 121.7 (d,  $^3J_{C-P}$  = 12.2 Hz), 119.6, 119.0, 110.9 (d,  $^2J_{C-P}$  = 22.2 Hz), 103.9 (d,  $^2J_{C-P}$  = 25.2 Hz), 82.5 (d,  $^1J_{C-P}$  = 103.2 Hz), 24.1 (d,  $^3J_{C-P}$  = 3.8 Hz), 23.8 (d,  $^2J_{C-P}$  = 15.7 Hz), 21.4 (d,  $^1J_{C-P}$  = 52.6 Hz), 13.5.

$^{31}\text{P}$  NMR (162 MHz,  $\text{CDCl}_3$ )  $\delta$ /ppm: 22.3.

$^{19}\text{F}$  NMR (376 MHz,  $\text{CDCl}_3$ )  $\delta$ /ppm: -106.4.

HRMS (EI)  $m/z$ :  $[\text{M}]^+$  calcd for  $\text{C}_{31}\text{H}_{34}\text{O}_3\text{PF}$ : 504.2230 found: 504.2215.

**6-nitro-11-(tributyl- $\lambda^5$ -phosphanylidene)-10H-benzo[5,6]pentaleno[1,2-b]chromene-10,12(11H)-dione 3k.**

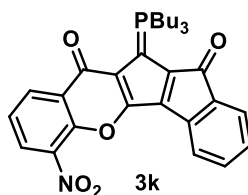



Following the **TP-B**, **3k** was obtained from 2-((8-nitro-4-oxo-4H-chromen-3-yl)methylene)-1H-indene-1,3(2H)-dione **1k** (104.18 mg, 0.3 mmol), PBu<sub>3</sub> (88.8 μL, 1.2 equiv.), benzoyl chloride **2a** (104.5 μL, 3.0 equiv.), and Et<sub>3</sub>N (150.5 μL, 3.6 equiv.) in anhydrous CH<sub>2</sub>Cl<sub>2</sub> (1.5 mL) at 30 °C for 3 h. After workup, the residue was purified by column chromatography (SiO<sub>2</sub>, Hexanes:EtOAc= 70:30) to give **3k** as a dark red solid (138.0 mg, 86%). R<sub>f</sub>= 0.33 (Hexanes:EtOAc = 8:2); mp.: 179.7-180.8 °C.

<sup>1</sup>H NMR (400 MHz, CDCl<sub>3</sub>) δ/ppm: 8.53 (dd, *J* = 7.9, 1.7 Hz, 1H), 7.38 (dd, *J* = 7.9, 1.7 Hz, 1H), 7.38-7.28 (m, 4H), 6.96 (td, *J* = 7.2, 2.1 Hz, 1H), 2.71-2.56 (m, 6H), 1.55-1.39 (m, 12H), 0.92 (t, *J* = 6.6 Hz, 9H).

<sup>13</sup>C{<sup>1</sup>H}-NMR (100 MHz, CDCl<sub>3</sub>) δ/ppm: 189.6, 171.7, 148.8, 144.5 (d, <sup>3</sup>J<sub>C-P</sub> = 11.8 Hz), 140.6, 138.9, 138.5, 135.6 (d, <sup>2</sup>J<sub>C-P</sub> = 9.6 Hz), 134.3, 132.1, 128.4, 125.3, 125.2, 123.4, 123.1 (d, <sup>3</sup>J<sub>C-P</sub> = 10.5 Hz), 121.3, 120.8 (d, <sup>2</sup>J<sub>C-P</sub> = 12.4 Hz), 119.6, 81.1 (d, <sup>1</sup>J<sub>C-P</sub> = 102.6 Hz), 24.1 (d, <sup>3</sup>J<sub>C-P</sub> = 3.9 Hz), 23.5 (d, <sup>2</sup>J<sub>C-P</sub> = 15.8 Hz), 21.2 (d, <sup>1</sup>J<sub>C-P</sub> = 52.6 Hz), 13.5.

<sup>31</sup>P NMR (162 MHz, CDCl<sub>3</sub>) δ/ppm: 22.6.

HRMS (EI) *m/z*: [M]<sup>+</sup> calcd for C<sub>31</sub>H<sub>34</sub>NO<sub>5</sub>P: 531.2175 found: 531.2159.

### 6,8-dimethyl-11-(tributyl-λ<sup>5</sup>-phosphanylidene)-10H-benzo[5,6]pentaleno[1,2-b]chromene-10,12(11H)-dione **3l**.

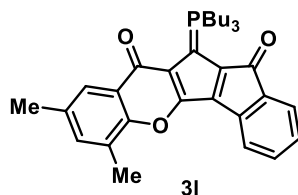

Following the **TP-B**, **3l** was obtained from 2-((6,8-dimethyl-4-oxo-4H-chromen-3-yl)methylene)-1H-indene-1,3(2H)-dione **1l** (330.3 mg, 0.3 mmol), PBu<sub>3</sub> (88.8 μL, 1.2 equiv.), benzoyl chloride **2a** (104.5 μL, 3.0 equiv.) and Et<sub>3</sub>N (150.5 μL, 3.6 equiv.) in anhydrous CH<sub>2</sub>Cl<sub>2</sub> (1.5 mL) at 30 °C for 24 h. After workup, the residue was purified by column chromatography (SiO<sub>2</sub>, Hexanes:EtOAc= 70:30) to give **3l** as a dark red solid (116.0 mg, 75%). R<sub>f</sub>= 0.50 (Hexanes:EtOAc = 8:2); mp.: 211.1-212.3 °C.

<sup>1</sup>H NMR (400 MHz, CDCl<sub>3</sub>) δ/ppm: 7.88 (d, *J* = 1.4 Hz, 1H), 7.32 (d, *J* = 7.3 Hz, 1H), 7.28-7.21 (m, 2H), 7.18 (d, *J* = 7.2 Hz, 1H), 6.90 (dd, *J* = 7.3, 0.82 Hz, 1H), 2.73-2.58 (m, 6H), 2.53 (s, 3H), 2.40 (s, 3H), 1.57-1.36 (m, 12H), 0.91 (t, *J* = 6.8 Hz, 9H).

<sup>13</sup>C{<sup>1</sup>H}-NMR (100 MHz, CDCl<sub>3</sub>) δ/ppm: 189.7, 174.7, 152.8, 146.3 (d, <sup>2</sup>J<sub>C-P</sub> = 12.1 Hz), 141.4, 139.3, 134.6, 134.1 (d, <sup>3</sup>J<sub>C-P</sub> = 9.8 Hz), 133.7, 131.4, 126.2, 124.5, 123.2, 122.6 (d, <sup>3</sup>J<sub>C-P</sub> = 10.9 Hz), 122.1 (d, <sup>2</sup>J<sub>C-P</sub> = 12.2 Hz), 122.0, 118.8, 82.3 (d, <sup>1</sup>J<sub>C-P</sub> = 103.7 Hz), 24.2 (d, <sup>3</sup>J<sub>C-P</sub> = 3.7 Hz), 23.8 (d, <sup>2</sup>J<sub>C-P</sub> = 15.7 Hz), 21.5 (d, <sup>1</sup>J<sub>C-P</sub> = 53.7 Hz), 20.7, 15.7, 13.5.

$^{31}\text{P}$  NMR (162 MHz,  $\text{CDCl}_3$ )  $\delta$ /ppm: 21.9.

HRMS (EI)  $m/z$ :  $[\text{M}]^+$  calcd for.  $\text{C}_{33}\text{H}_{39}\text{O}_3\text{P}$ : 514.2637 found: 514.2618.

**6,8-dibromo-11-(tributyl- $\lambda^5$ -phosphanylidene)-10H-benzo[5,6]pentaleno[1,2-b]chromene-10,12(11H)-dione **3m**.**

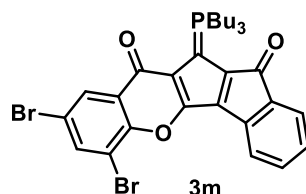

Following the **TP-B**, **3m** was obtained from 2-((6,8-dibromo-4-oxo-4H-chromen-3-yl)methylene)-1H-indene-1,3(2H)-dione **1m** (138.02 mg, 0.3 mmol),  $\text{PBu}_3$  (88.8  $\mu\text{L}$ , 1.2 equiv.), benzoyl chloride **2a** (104.5  $\mu\text{L}$ , 3.0 equiv.), and  $\text{Et}_3\text{N}$  (150.5  $\mu\text{L}$ , 3.6 equiv.) in anhydrous  $\text{CH}_2\text{Cl}_2$  (1.5 mL) at 30 °C for 8 h. After workup, the residue was purified by column chromatography ( $\text{SiO}_2$ , Hexane:EtOAc = 75:25) to give **3m** as a dark red solid (165.0 mg, 85%).  $R_f$  = 0.40 (Hexanes:EtOAc = 9:1); mp.: 214.2-215.5 °C.

$^1\text{H}$  NMR (400 MHz,  $\text{CDCl}_3$ )  $\delta$ /ppm: 8.30 (d,  $J$  = 8.3 Hz, 1H), 7.91 (d,  $J$  = 2.3 Hz, 1H), 7.35 (d,  $J$  = 7.4 Hz, 1H), 7.32-7.27 (m, 2H), 6.99-6.90 (m, 1H), 2.73-2.49 (m, 6H), 1.58-1.35 (m, 12H), 0.91 (t,  $J$  = 6.7 Hz, 9H).

$^{13}\text{C}\{^1\text{H}\}$ -NMR (100 MHz,  $\text{CDCl}_3$ )  $\delta$ /ppm: 189.7, 171.8, 151.6, 145.3 (d,  $^2J_{\text{C-P}}$  = 11.8 Hz), 140.9, 140.8, 139.0, 137.5, 135.4 (d,  $^3J_{\text{C-P}}$  = 9.6 Hz), 134.1, 128.3, 125.1, 125.0, 123.5, 122.8 (d,  $^3J_{\text{C-P}}$  = 10.5 Hz), 120.8 (d,  $^2J_{\text{C-P}}$  = 12.4 Hz), 119.4, 115.1, 112.0, 82.8 (d,  $^1J_{\text{C-P}}$  = 102.8 Hz), 24.1 (d,  $^3J_{\text{C-P}}$  = 4.1 Hz), 23.8 (d,  $^2J_{\text{C-P}}$  = 15.8 Hz), 21.3 (d,  $^1J_{\text{C-P}}$  = 52.8 Hz), 13.5.

$^{31}\text{P}$  NMR (162 MHz,  $\text{CDCl}_3$ )  $\delta$ /ppm: 22.4.

HRMS (EI)  $m/z$ :  $[\text{M}]^+$  calcd for  $\text{C}_{31}\text{H}_{33}^{79}\text{Br}^{79}\text{BrO}_3\text{P}$ : 642.0534 found: 642.0519.

HRMS (EI)  $m/z$ :  $[\text{M}]^+$  calcd for  $\text{C}_{31}\text{H}_{33}^{79}\text{Br}^{81}\text{BrO}_4\text{P}$ : 644.0514 found: 644.0522.

HRMS (EI)  $m/z$ :  $[\text{M}]^+$  calcd for  $\text{C}_{31}\text{H}_{33}^{81}\text{Br}^{81}\text{BrO}_4\text{P}$ : 646.0493 found: 646.0487.

**13-(tributyl- $\lambda^5$ -phosphanylidene)-12H-benzo[f]benzo[5,6]pentaleno[1,2-b]chromene-12,14(13H)-dione **3n**.**

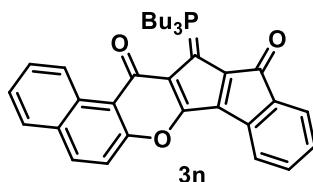

Following the **TP-B**, **3n** was obtained from 2-((1-oxo-1H-benzo[f]chromen-2-yl)methylene)-1H-indene-1,3(2H)-dione **1n** (105.7 mg, 0.3 mmol),  $\text{PBu}_3$  (88.8  $\mu\text{L}$ , 1.2 equiv.), benzoyl chloride **2a** (104.5  $\mu\text{L}$ , 3.0 equiv.), and  $\text{Et}_3\text{N}$  (150.5  $\mu\text{L}$ , 3.6 equiv.) in

anhydrous CH<sub>2</sub>Cl<sub>2</sub> (1.5 mL) at 30 °C for 48 h. After workup, the residue was purified by column chromatography (SiO<sub>2</sub>, Hexanes:EtOAc = 70:30) to give **3n** as a dark red solid (85.1 mg, 52%). R<sub>f</sub> = 0.53 (Hexanes:EtOAc = 7:3); mp.: 189.4-190.3 °C.

<sup>1</sup>H NMR (400 MHz, CDCl<sub>3</sub>) δ/ppm: 10.17 (d, *J* = 8.7 Hz, 1H), 7.98 (d, *J* = 9.1 Hz, 1H), 7.87 (d, *J* = 8.0 Hz, 1H), 7.69 (t, *J* = 7.9 Hz, 1H), 7.57 (d, *J* = 9.1 Hz, 1H), 7.52 (t, *J* = 7.5 Hz, 1H), 7.32 (d, *J* = 7.3 Hz, 1H), 7.29-7.20 (m, 2H), 6.95-6.85 (m, 1H), 2.79-2.59 (m, 6H), 1.55-1.40 (m, 12H), 0.92 (t, *J* = 6.7 Hz, 9H).

<sup>13</sup>C{<sup>1</sup>H}-NMR (100 MHz, CDCl<sub>3</sub>) δ/ppm: 189.6, 177.2, 157.3, 144.7 (d, <sup>3</sup>J<sub>C-P</sub> = 12.0 Hz), 141.3, 141.2, 139.4, 133.8, 133.7, 133.4 (d, <sup>2</sup>J<sub>C-P</sub> = 10.0 Hz), 132.2, 130.2, 128.1, 126.9, 125.2 (d, <sup>2</sup>J<sub>C-P</sub> = 11.4 Hz), 124.9, 124.6, 123.2, 122.7 (d, <sup>3</sup>J<sub>C-P</sub> = 10.6 Hz), 118.7, 118.6, 114.7, 81.2 (d, <sup>1</sup>J<sub>C-P</sub> = 104.5 Hz), 24.3 (d, <sup>3</sup>J<sub>C-P</sub> = 3.9 Hz), 23.8 (d, <sup>2</sup>J<sub>C-P</sub> = 15.7 Hz), 21.8 (d, <sup>1</sup>J<sub>C-P</sub> = 53.7 Hz), 13.6.

<sup>31</sup>P NMR (162 MHz, CDCl<sub>3</sub>) δ/ppm: 21.9.

HRMS (EI) m/z: [M]<sup>+</sup> calcd for C<sub>35</sub>H<sub>37</sub>O<sub>3</sub>P: 536.2480 found: 536.2464.

**8-(tributyl-λ<sup>5</sup>-phosphanylidene)-7H-benzo[h]benzo[5,6]pentaleno[1,2-b]chromene-7,9(8H)-dione **3o**.**

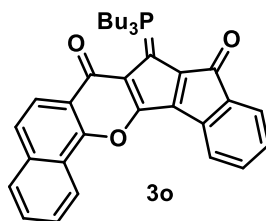

Following the **TP-B**, **3o** was obtained from 2-((4-oxo-4H-benzo[h]chromen-3-yl)methylene)-1H-indene-1,3(2H)-dione **1o** (105.72 mg, 0.3 mmol), PBu<sub>3</sub> (88.8 μL, 1.2 equiv.), benzoyl chloride **2a** (104.5 μL, 3.0 equiv.), and Et<sub>3</sub>N (150.5 μL, 3.6 equiv.) in anhydrous CH<sub>2</sub>Cl<sub>2</sub> (1.5 mL) at 30 °C for 24 h. After workup, the residue was purified by column chromatography (SiO<sub>2</sub>, Hexanes:EtOAc = 75:25) to give **3o** as a dark red solid (118.0 mg, 73%). R<sub>f</sub> = 0.50 (Hexanes:EtOAc = 8:2); mp.: 191.3-192.1 °C.

<sup>1</sup>H NMR (400 MHz, CDCl<sub>3</sub>) δ/ppm: 8.69-8.61 (m, 1H), 8.23 (d, *J* = 8.7 Hz, 1H), 7.94-7.84 (m, 1H), 7.73-7.60 (m, 3H), 7.42-7.29 (m, 3H), 6.94 (td, *J* = 7.4, 1.0 Hz, 1H), 2.79-2.56 (m, 6H), 1.62-1.37 (m, 12H), 0.91 (t, *J* = 6.9 Hz, 9H).

<sup>13</sup>C{<sup>1</sup>H}-NMR (100 MHz, CDCl<sub>3</sub>) δ/ppm: 189.7, 174.4, 153.1, 145.9 (d, <sup>3</sup>J<sub>C-P</sub> = 12.2 Hz), 141.3, 139.6, 135.6, 133.9 (d, <sup>2</sup>J<sub>C-P</sub> = 9.9 Hz), 133.8, 128.3, 127.8, 126.3, 124.8, 124.4, 123.3, 123.1 (d, <sup>2</sup>J<sub>C-P</sub> = 10.3 Hz), 122.9 (d, <sup>3</sup>J<sub>C-P</sub> = 12.3 Hz), 122.7, 122.4, 121.9, 118.9, 117.9, 81.7 (d, <sup>1</sup>J<sub>C-P</sub> = 104.0 Hz), 24.2 (d, <sup>3</sup>J<sub>C-P</sub> = 3.9 Hz), 23.8 (d, <sup>3</sup>J<sub>C-P</sub> = 15.7 Hz), 21.6 (d, <sup>3</sup>J<sub>C-P</sub> = 53.3 Hz), 13.5.

<sup>31</sup>P NMR (162 MHz, CDCl<sub>3</sub>) δ/ppm: 22.1.

HRMS (EI) m/z: [M]<sup>+</sup> calcd for C<sub>35</sub>H<sub>37</sub>O<sub>3</sub>P: 536.2480 found: 536.2489.

**10,12-dioxo-11-(tributyl- $\lambda^5$ -phosphanylidene)-11,12-dihydro-10H-benzo[5,6]pentaleno[1,2-b]chromen-9-yl benzoate **3p**.**

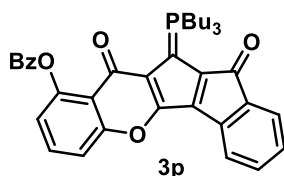

Following the **TP-B**, **3p** was obtained from 2-((5-hydroxy-4-oxo-4H-chromen-3-yl)methylene)-1H-indene-1,3(2H)-dione **1p** (95.40 mg, 0.3 mmol),  $\text{PBu}_3$  (88.8  $\mu\text{L}$ , 1.2 equiv.), benzoyl chloride **2a** (156.83  $\mu\text{L}$ , 4.5 equiv.) and  $\text{Et}_3\text{N}$  (192.30  $\mu\text{L}$ , 4.6 equiv.) in anhydrous  $\text{CH}_2\text{Cl}_2$  (1.5 mL) at 30 °C for 24 h. After workup, the residue was purified by column chromatography ( $\text{SiO}_2$ , Hexanes:EtOAc= 80:20) to give **3p** as a dark red solid (128.0 mg, 70%).  $R_f$ = 0.40 (Hexanes:EtOAc = 9:1); mp.: 190.8-191.5 °C.

$^1\text{H NMR}$  (400 MHz,  $\text{CDCl}_3$ )  $\delta$ /ppm: 8.26 (d,  $J$  = 7.3 Hz, 2H), 7.63 (t,  $J$  = 7.4 Hz, 1H), 7.57-7.47 (m, 3H), 7.39 (d,  $J$  = 8.5 Hz, 1H), 7.30 (d,  $J$  = 7.3 Hz, 1H), 7.27-7.28 (m, 2H), 6.98 (d,  $J$  = 7.6 Hz, 1H), 7.39 (dd,  $J$  = 7.1, 1.6 Hz, 1H), 2.51-2.34 (m, 6H), 1.58-1.28 (m, 12H), 0.86 (t,  $J$  = 6.8 Hz, 9H).

$^{13}\text{C}\{^1\text{H}\}$ -NMR (100 MHz,  $\text{CDCl}_3$ )  $\delta$ /ppm: 189.5, 173.4, 165.4, 157.7, 150.2, 144.9 (d,  $^2J_{\text{C-P}}$  = 11.8 Hz), 141.3, 141.2, 139.3, 133.8 (d,  $^3J_{\text{C-P}}$  = 11.8 Hz), 133.7, 132.8, 131.6, 130.8, 130.3, 128.2, 124.6, 123.3 (d,  $^3J_{\text{C-P}}$  = 12.3 Hz), 123.2, 122.3 (d,  $^2J_{\text{C-P}}$  = 12.2 Hz), 118.9, 116.9, 115.9, 82.4 (d,  $^1J_{\text{C-P}}$  = 103.5 Hz), 24.1 (d,  $^3J_{\text{C-P}}$  = 3.9 Hz), 23.8 (d,  $^2J_{\text{C-P}}$  = 15.9 Hz), 21.5 (d,  $^1J_{\text{C-P}}$  = 53.0 Hz), 13.5.

$^{31}\text{P NMR}$  (162 MHz,  $\text{CDCl}_3$ )  $\delta$ /ppm: 21.6.

HRMS (EI)  $m/z$ :  $[\text{M}]^+$  calcd for  $\text{C}_{38}\text{H}_{39}\text{O}_5\text{P}$ : 606.2535 found: 606.2524.

**2,3-dimethoxy-11-(tributyl- $\lambda^5$ -phosphanylidene)-10H-benzo[5,6]pentaleno[1,2-b]chromene-10,12(11H)-dione **3q**.**

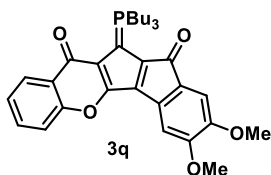

Following the **TP-B**, **3q** was obtained 5,6-dimethoxy-2-((4-oxo-4H-chromen-3-yl)methylene)-1H-indene-1,3(2H)-dione **1q** (108.7 mg, 0.3 mmol),  $\text{PBu}_3$  (88.8  $\mu\text{L}$ , 1.2 equiv.), benzoyl chloride **2a** (104.5  $\mu\text{L}$ , 3.0 equiv.) and  $\text{Et}_3\text{N}$  (150.5  $\mu\text{L}$ , 3.6 equiv.) in anhydrous  $\text{CH}_2\text{Cl}_2$  (1.5 mL) at 30 °C for 3 h. After workup, the residue was purified by column chromatography ( $\text{SiO}_2$ , Hexanes:EtOAc = 72:25) to give **3q** as a reddish brown solid (90.0 mg, 55%).  $R_f$  = 0.38 (Hexanes/EtOAc = 8:2); mp.: 160.7-161.7 °C.

$^1\text{H NMR}$  (400 MHz,  $\text{CDCl}_3$ )  $\delta$ /ppm: 8.23 (dd,  $J$  = 7.9, 1.6 Hz, 1H), 7.56 (dtd,  $J$  = 8.9,

7.5, 1.7 Hz, 1H), 7.27 (dd,  $J = 7.5, 0.7$  Hz, 1H), 6.98 (s, 1H), 6.83 (s, 1H), 4.03 (s, 3H), 3.86 (s, 3H), 2.71-2.55 (m, 6H), 1.57-1.38 (m, 12H), 0.92 (t,  $J = 6.7$  Hz, 9H).

$^{13}\text{C}\{^1\text{H}\}$ -NMR (100 MHz,  $\text{CDCl}_3$ )  $\delta$ /ppm: 189.2, 173.6, 156.2, 153.9, 146.4, 145.6 (d,  $^2J_{\text{C-P}} = 11.9$  Hz), 136.7, 135.3 (d,  $^3J_{\text{C-P}} = 9.6$  Hz), 132.0, 131.2, 126.1, 122.8, 122.5, 121.4 (d,  $^2J_{\text{C-P}} = 12.1$  Hz), 120.5 (d,  $^3J_{\text{C-P}} = 10.7$  Hz), 117.3, 107.9, 103.4, 82.9 (d,  $^1J_{\text{C-P}} = 103.2$  Hz), 56.3, 56.2, 24.2 (d,  $^3J_{\text{C-P}} = 3.8$  Hz), 23.8 (d,  $^2J_{\text{C-P}} = 15.7$  Hz), 21.4 (d,  $^1J_{\text{C-P}} = 52.8$  Hz), 13.5.

$^{31}\text{P}$  NMR (162 MHz,  $\text{CDCl}_3$ )  $\delta$ /ppm: 22.0.

HRMS (EI)  $m/z$ :  $[\text{M}]^+$  calcd for  $\text{C}_{33}\text{H}_{39}\text{O}_5\text{P}$ : 546.2535. found: 546.2538.

### 3-(4-benzoyl-2,5-diphenylfuran-3-yl)-4H-chromen-4-one **6**.

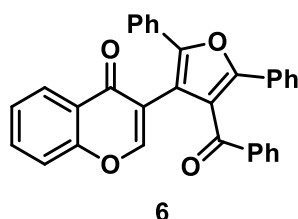

Following the **TP-B**, **6** was obtained 2-((4-oxo-4H-chromen-3-yl)methylene)-1,3-diphenylpropane-1,3-dione **1r** (114.1 mg, 0.3 mmol),  $\text{PBU}_3$  (88.8  $\mu\text{L}$ , 1.2 equiv.), benzoyl chloride **2a** (104.5  $\mu\text{L}$ , 3.0 equiv.) and  $\text{Et}_3\text{N}$  (150.5  $\mu\text{L}$ , 3.6 equiv.) in anhydrous  $\text{CH}_2\text{Cl}_2$  (1.5 mL) at 30 °C for 3 h. After workup, the residue was purified by column chromatography ( $\text{SiO}_2$ , Hexanes:EtOAc = 70:30) to give **6** as a half-white solid (99.0 mg, 75%).  $R_f = 0.38$  (Hexanes/EtOAc = 8:2); mp.: 115.8-116.8 °C.

$^1\text{H}$  NMR (400 MHz,  $\text{CDCl}_3$ )  $\delta$ /ppm: 8.16 (dd,  $J = 7.9, 1.6$  Hz, 1H), 8.02 (s, 1H), 7.86 (dd,  $J = 8.3, 1.4$  Hz, 1H), 7.73-7.62 (m, 3H), 7.55-7.48 (m, 2H), 7.44 (d,  $J = 8.4$  Hz, 1H), 7.40-7.28 (m, 5H), 7.27-7.18 (m, 5H).

$^{13}\text{C}\{^1\text{H}\}$ -NMR (100 MHz,  $\text{CDCl}_3$ )  $\delta$ /ppm: 192.4, 175.6, 156.2, 154.9, 152.6, 150.5, 137.2, 133.6, 132.9, 129.8, 129.7, 129.2, 128.6, 128.6, 128.2, 128.1, 127.1, 126.2, 126.1, 125.1, 123.8, 123.8, 118.0, 117.4, 113.8.

HRMS (EI)  $m/z$ :  $[\text{M}]^+$  calcd for  $\text{C}_{32}\text{H}_{20}\text{O}_4\text{P}$ : 468.1362. found: 468.1352.

### 2-(2-oxo-1-(4-oxo-4H-chromen-3-yl)-2-phenylethylidene)-1H-indene-1,3(2H)-dione **5aa**.

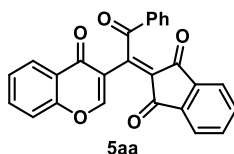

Following the **TP-C**, **5aa** was obtained from 2-((4-oxo-4H-chromen-3-yl)methylene)-1H-indene-1,3(2H)-dione **1a** (90.75 mg, 0.3 mmol),  $\text{Me}_2\text{PhP}$  (8.54  $\mu\text{L}$ , 0.2 equiv.),

benzoyl chloride **2a** (41.82  $\mu\text{L}$ , 1.2 equiv.), and  $\text{Et}_3\text{N}$  (54.36  $\mu\text{L}$ , 1.3 equiv.) in anhydrous THF (1.5 mL) at 30  $^\circ\text{C}$  for 0.5 h. After completion of the reaction, the residue was purified by column chromatography ( $\text{SiO}_2$ , Hexanes:EtOAc= 70:30) to give **5aa** as a pale yellow solid (110.0 mg, 90%).  $R_f$ = 0.41 (Hexanes:EtOAc = 7:3); mp.: 248.2-248.5  $^\circ\text{C}$ .

$^1\text{H NMR}$  (400 MHz,  $\text{CDCl}_3$ )  $\delta$ /ppm: 8.30 (s, 1H), 8.29 (dd,  $J$  = 7.9, 1.5 Hz 1H), 8.11 (dd,  $J$  = 7.3, 1.2, Hz 1H), 7.96-7.92 (m, 1H), 7.89-7.84 (m, 1H), 7.84-7.74 (m, 2H), 7.70 (dtd,  $J$  = 9.0 7.3, 1.6, Hz, 1H), 7.57 (t,  $J$  = 7.4 Hz 1H), 7.50-7.41 (m, 4H).

$^{13}\text{C}\{^1\text{H}\}$ -NMR (100 MHz,  $\text{CDCl}_3$ )  $\delta$ /ppm: 195.4, 187.6, 187.3, 173.0, 155.9, 155.4, 146.2, 142.6, 140.7, 135.8, 132.7, 134.9, 134.3, 134.2, 131.6, 129.0, 128.9, 126.6, 126.0, 123.7, 123.6, 123.5, 118.4, 118.2.

HRMS (ESI)  $m/z$ :  $[\text{M}+\text{H}]^+$  calcd for.  $\text{C}_{26}\text{H}_{14}\text{O}_5$ : 407.0919 found: 407.0916.

### 2-(1-(6-methyl-4-oxo-4H-chromen-3-yl)-2-oxo-2-phenylethylidene)-1H-indene-1,3(2H)-dione **5ba**.

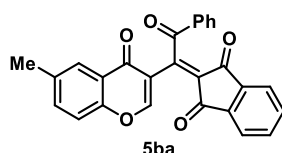

Following the TP-C, **5ba** was obtained from 2-((6-methyl-4-oxo-4H-chromen-3-yl)methylene)-1H-indene-1,3(2H)-dione **1b** (94.89 mg, 0.3 mmol),  $\text{Me}_2\text{PhP}$  (8.54  $\mu\text{L}$ , 0.2 equiv.), benzoyl chloride **2a** (41.82  $\mu\text{L}$ , 1.2 equiv.), and  $\text{Et}_3\text{N}$  (54.36  $\mu\text{L}$ , 1.3 equiv.) in anhydrous THF (1.5 mL) at 30  $^\circ\text{C}$  for 3 h. After completion of the reaction, the residue was purified by column chromatography ( $\text{SiO}_2$ , Hexanes:EtOAc =70:30) to give **5ba** as a pale yellow solid (101.0 mg, 80%).  $R_f$  = 0.45 (Hexanes:EtOAc = 7:3); mp.: 290.3-291.2  $^\circ\text{C}$ .

$^1\text{H NMR}$  (400 MHz,  $\text{CDCl}_3$ )  $\delta$ /ppm: 8.27 (s, 1H), 8.14-8.07 (m, 3H), 7.95 (dd,  $J$  = 6.1, 1.5 Hz, 1H), 7.90-7.85 (m, 1H), 7.83-7.75 (m, 2H), 7.56 (t,  $J$  = 7.5 Hz, 1H), 7.52 (dd,  $J$  = 8.6, 2.1 Hz, 1H), 7.46 (t,  $J$  = 7.8 Hz, 2H), 7.38 (d,  $J$  = 8.6 Hz, 1H), 2.50 (s, 3H).

$^{13}\text{C}\{^1\text{H}\}$ -NMR (100 MHz,  $\text{CDCl}_3$ )  $\delta$ /ppm: 195.4, 187.8, 187.4, 173.1, 155.3, 154.2, 146.5, 142.7, 140.8, 136.2, 135.8, 135.6, 135.5, 135.1, 134.2, 131.5, 129.1, 128.9, 126.0, 123.7, 123.6, 123.4, 118.2, 117.9, 20.9.

HRMS (ESI)  $m/z$ :  $[\text{M}+\text{H}]^+$  calcd for  $\text{C}_{27}\text{H}_{16}\text{O}_5$ : 420.0998 found: 420.0989.

### 2-(1-(6-chloro-4-oxo-4H-chromen-3-yl)-2-oxo-2-phenylethylidene)-1H-indene-1,3(2H)-dione **5ea**.

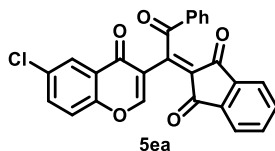

Following the **TP-C**, **5ea** was obtained from 2-((6-chloro-4-oxo-4H-chromen-3-yl)methylene)-1H-indene-1,3(2H)-dione **1e** (101.02 mg, 0.3 mmol), Me<sub>2</sub>PhP (8.54 μL, 0.2 equiv.), benzoyl chloride **2a** (41.82 μL, 1.2 equiv.), and Et<sub>3</sub>N (54.36 μL, 1.3 equiv.) in anhydrous THF (1.5 mL) at 30 °C for 0.5 h. After completion of the reaction, the residue was purified by column chromatography (SiO<sub>2</sub>, Hexanes:EtOAc= 70:30) to give **5ea** as a pale yellow solid (95.0 mg, 72%). R<sub>f</sub>= 0.45 (Hexanes:EtOAc = 7:3); mp.: 270.1-271.2 °C.

<sup>1</sup>H NMR (400 MHz, CDCl<sub>3</sub>) δ/ppm: 8.29 (s, 1H), 8.27 (dd, *J* = 2.6 Hz, 1H), 8.12-8.07 (m, 2H), 7.99-7.95 (m, 1H), 7.91-7.87 (m, 1H), 7.85-7.77 (m, 2H), 7.70 (dd, *J* = 9.4, 2.7 Hz, 1H), 7.62-7.56 (m, 1H), 7.51-7.43 (m, 3H).

<sup>13</sup>C{<sup>1</sup>H}-NMR (100 MHz, CDCl<sub>3</sub>) δ/ppm: 195.3, 187.6, 187.3, 171.9, 155.2, 154.3, 145.4, 142.6, 140.8, 135.9, 135.7, 134.9, 134.5, 134.4, 132.1, 131.8, 129.1, 128.9, 126.1, 124.6, 123.7, 123.6, 119.9, 118.4.

HRMS (EI) m/z: [M]<sup>+</sup> calcd for C<sub>26</sub>H<sub>13</sub><sup>35</sup>Cl O<sub>5</sub>: 440.0452 found: 440.0434.

HRMS (EI) m/z: [M]<sup>+</sup> calcd for C<sub>26</sub>H<sub>13</sub><sup>37</sup>Cl O<sub>5</sub>: 442.0422 found: 442.0436.

### 2-(1-(7-methoxy-4-oxo-4H-chromen-3-yl)-2-oxo-2-phenylethylidene)-1H-indene-1,3(2H)-dione **5ia**.

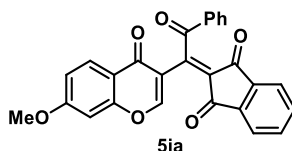

Following the **TP-C**, **5ia** was obtained from 2-((7-methoxy-4-oxo-4H-chromen-3-yl)methylene)-1H-indene-1,3(2H)-dione **1i** (99.69 mg, 0.3 mmol), Me<sub>2</sub>PhP (8.54 μL, 0.2 equiv.), benzoyl chloride **2a** (41.82 μL, 1.2 equiv.), and Et<sub>3</sub>N (54.36 μL, 1.3 equiv.) in anhydrous THF (1.5 mL) at 30 °C for 2 h. After completion of the reaction, the residue was purified by column chromatography (SiO<sub>2</sub>, Hexanes:EtOAc= 70:30) to give **5ia** as a pale yellow solid (82.0 mg, 62%). R<sub>f</sub>= 0.40 (Hexanes:EtOAc = 7:3) ; mp.: 268.8-269.3 °C.

<sup>1</sup>H NMR (400 MHz, CDCl<sub>3</sub>) δ/ppm: 8.23 (s, 1H), 8.19 (d, *J* = 8.9 Hz, 1H), 8.14-8.07 (m, 2H), 7.99-7.95 (m, 1H), 7.90-7.86 (m, 1H), 7.85-7.74 (m, 2H), 7.62-7.54 (m, 1H), 7.50-7.43 (m, 2H), 7.02 (dd, *J* = 9.1, 2.3 Hz, 1H), 6.87 (d, *J* = 2.4 Hz, 1H), 3.91 (s, 3H).

<sup>13</sup>C{<sup>1</sup>H}-NMR (100 MHz, CDCl<sub>3</sub>) δ/ppm: 195.5, 187.8, 187.4, 172.3, 164.6, 157.7, 155.1, 146.6, 142.7, 140.8, 135.8, 135.6, 135.1, 134.1, 131.6, 129.1, 128.9, 128.1, 123.7,

123.6, 118.5, 117.6, 115.2, 100.5, 55.9.

HRMS (EI)  $m/z$ :  $[M]^+$  calcd for  $C_{27}H_{16}O_6$ : 436.0947 found: 436.0966.

**2-(1-(7-fluoro-4-oxo-4H-chromen-3-yl)-2-oxo-2-phenylethylidene)-1H-indene-1,3(2H)-dione 5ja.**

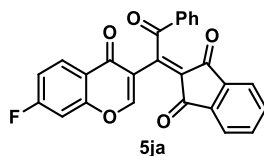

Following the TP-C, **5ja** was obtained from 2-((7-fluoro-4-oxo-4H-chromen-3-yl)methylene)-1H-indene-1,3(2H)-dione **1j** (96.08 mg, 0.3 mmol),  $Me_2PhP$  (8.54  $\mu L$ , 0.2 equiv.), benzoyl chloride **2a** (41.82  $\mu L$ , 1.2 equiv.), and  $Et_3N$  (54.36  $\mu L$ , 1.3 equiv.) in anhydrous THF (1.5 mL) at 30 °C for 0.5 h. After completion of the reaction, the residue was purified by column chromatography ( $SiO_2$ , Hexanes:EtOAc = 70:30) to give **5ja** as a pale yellow solid (95.4 mg, 75%).  $R_f$  = 0.43 (Hexanes:EtOAc = 7:3); mp.: 223.5-224.5 °C.

$^1H$  NMR (400 MHz,  $CDCl_3$ )  $\delta$ /ppm: 8.3 (dd,  $J$  = 8.7, 6.3 Hz, 1H), 8.29 (s, 1H), 8.11 (d,  $J$  = 7.8 Hz, 2H), 7.96 (dd,  $J$  = 6.4, 1.3 Hz, 1H), 7.93-7.85 (m, 1H), 7.85-7.75 (m, 2H), 7.58 (t,  $J$  = 7.5 Hz, 1H), 7.47 (t,  $J$  = 7.7 Hz, 2H), 7.24-7.15 (m, 2H).

$^{13}C\{^1H\}$ -NMR (100 MHz,  $CDCl_3$ )  $\delta$ /ppm: 195.3, 187.7, 187.3, 172.2, 167.2, 164.6, 157.9 (d,  $J_{C-F}$  = 13.3 Hz), 155.2, 145.6, 142.6, 140.8, 135.9, 135.8, 134.9, 134.3, 131.8, 129.1 (d,  $J_{C-F}$  = 10.9 Hz), 129.1, 128.9, 123.8, 123.7, 120.7, 120.6, 118.7, 114.8 (d,  $J_{C-F}$  = 22.8 Hz), 105.0 (d,  $J_{C-F}$  = 25.6 Hz).

$^{19}F$  NMR (376 MHz,  $CDCl_3$ )  $\delta$ /ppm: -101.3.

HRMS (EI)  $m/z$ :  $[M]^+$  calcd for  $C_{26}H_{13}O_5F$ : 424.0747 found: 424.0745.

**2-(1-(6,8-dimethyl-4-oxo-4H-chromen-3-yl)-2-oxo-2-phenylethylidene)-1H-indene-1,3(2H)-dione 5la.**

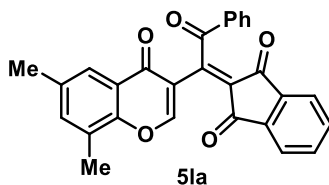

Following the TP-C, **5la** was obtained from 2-((6,8-dimethyl-4-oxo-4H-chromen-3-yl)methylene)-1H-indene-1,3(2H)-dione **1l** (99.10 mg, 0.3 mmol),  $Me_2PhP$  (8.54  $\mu L$ , 0.2 equiv.), benzoyl chloride **2a** (41.82  $\mu L$ , 1.2 equiv.), and  $Et_3N$  (54.36  $\mu L$ , 1.3 equiv.) in anhydrous THF (1.5 mL) at 30 °C for 0.5 h. After completion of the reaction, the residue was purified by column chromatography ( $SiO_2$ , Hexanes:EtOAc = 70:30) to give **5la** as a pale yellow solid (105.1 mg, 80%).  $R_f$  = 0.53 (Hexanes:EtOAc = 7:3); mp.:



304.1-305.2 °C.

$^1\text{H NMR}$  (400 MHz,  $\text{CDCl}_3$ )  $\delta$ /ppm: 8.32 (s, 1H), 8.10 (dd,  $J = 7.3, 1.4$  Hz, 1H), 7.99-7.93 (m, 1H), 7.92 (d,  $J = 0.8$  Hz, 1H), 7.89-7.85 (m, 1H), 7.83-7.75 (m, 2H), 7.60-7.53 (m, 1H), 7.50-7.42 (m, 2H), 7.36 (s, 1H).

$^{13}\text{C}\{^1\text{H}\}$ -NMR (100 MHz,  $\text{CDCl}_3$ )  $\delta$ /ppm: 195.4, 187.9, 187.4, 173.4, 155.2, 152.8, 146.8, 142.7, 140.8, 136.5, 135.8, 135.6, 135.5, 135.1, 134.1, 131.4, 129.1, 128.9, 127.4, 123.7, 123.6, 123.5, 123.4, 117.9, 20.9, 15.3.

HRMS (EI)  $m/z$ :  $[\text{M}]^+$  calcd for  $\text{C}_{28}\text{H}_{18}\text{O}_5$ : 434.1154 found: 434.1163.

### 2-(1-(6,8-dibromo-4-oxo-4H-chromen-3-yl)-2-oxo-2-phenylethylidene)-1H-indene-1,3(2H)-dione **5ma**.

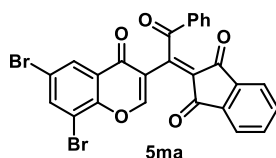

Following the **TP-C**, **5ma** was obtained from 2-((6,8-dibromo-4-oxo-4H-chromen-3-yl)methylene)-1H-indene-1,3(2H)-dione **1m** (138.04 mg, 0.3 mmol),  $\text{Me}_2\text{PhP}$  (8.54  $\mu\text{L}$ , 0.2 equiv.), benzoyl chloride **2a** (41.82  $\mu\text{L}$ , 1.2 equiv.), and  $\text{Et}_3\text{N}$  (54.36  $\mu\text{L}$ , 1.3 equiv.) in anhydrous THF (1.5 mL) at 30 °C for 0.5 h. After completion of the reaction, the residue was purified by column chromatography ( $\text{SiO}_2$ , Hexanes:EtOAc = 70:30) to give **5ma** as a pale yellow solid (85.0 mg, 50%).  $R_f = 0.30$  (Hexanes:EtOAc = 7:3); mp.: 269.1-270.5 °C.

$^1\text{H NMR}$  (400 MHz,  $\text{CDCl}_3$ )  $\delta$ /ppm: 8.41-8.34 (m, 2H), 8.12-8.04 (m, 3H), 7.98-7.94 (m, 1H), 7.92-7.87 (m, 1Hz), 7.86-7.77 (m, 2H), 7.59 (t,  $J = 7.4$  Hz, 1H), 7.47 (t,  $J = 7.8$  Hz, 2H).

$^{13}\text{C}\{^1\text{H}\}$ -NMR (100 MHz,  $\text{CDCl}_3$ )  $\delta$ /ppm: 194.9, 187.4, 187.3, 171.4, 154.8, 151.6, 144.6, 142.6, 140.9, 140.0, 136.0, 135.9, 134.8, 134.4, 132.1, 129.1, 129.0, 128.7, 125.7, 123.8, 119.4, 118.6, 113.1.

HRMS (EI)  $m/z$ :  $[\text{M}]^+$  calcd for  $\text{C}_{26}\text{H}_{12}^{79}\text{Br}^{79}\text{BrO}_5$ : 561.9051 found: 561.9042.

HRMS (EI)  $m/z$ :  $[\text{M}]^+$  calcd for  $\text{C}_{26}\text{H}_{12}^{79}\text{Br}^{81}\text{BrO}_5$ : 563.9031 found: 563.9021.

HRMS (EI)  $m/z$ :  $[\text{M}]^+$  calcd for  $\text{C}_{26}\text{H}_{12}^{81}\text{Br}^{81}\text{BrO}_5$ : 565.9011 found: 565.9024.

### 2-(2-oxo-1-(1-oxo-1H-benzo[f]chromen-2-yl)-2-phenylethylidene)-1H-indene-1,3(2H)-dione **5na**.

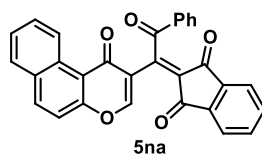

Following the **TP-C**, **5na** was obtained from 2-((1-oxo-1H-benzo[f]chromen-2-yl)methylene)-1H-indene-1,3(2H)-dione **1n** (105.70 mg, 0.3 mmol), Me<sub>2</sub>PhP (8.54 μL, 0.2 equiv.), benzoyl chloride **2a** (41.82 μL, 1.2 equiv.), and Et<sub>3</sub>N (54.36 μL, 1.3 equiv.) in anhydrous THF (1.5 mL) at 30 °C for 2 h. After completion of the reaction, the residue was purified by column chromatography (SiO<sub>2</sub>, Hexanes:EtOAc = 65:35) to give **5na** as a pale yellow solid (97.0 mg, 74%). R<sub>f</sub> = 0.45 (Hexanes:EtOAc = 7:3); mp.: 264.5-265.6 °C.

<sup>1</sup>H NMR (400 MHz, CDCl<sub>3</sub>) δ/ppm: 9.94 (d, *J* = 8.7 Hz, 1H), 8.32 (s, 1H), 8.23-8.20 (m, 2H), 8.12 (d, *J* = 9.1 Hz, 1H), 7.97-7.94 (m, 1H), 7.92 (d, *J* = 7.4 Hz, 1H), 7.90-7.86 (m, 1H), 7.84-7.72 (m, 3H), 7.63 (dtd, *J* = 8.78, 7.2, 1.2 Hz, 1H), 7.60-7.55 (m, 1H), 7.53-7.44 (m, 3H).

<sup>13</sup>C{<sup>1</sup>H}-NMR (100 MHz, CDCl<sub>3</sub>) δ/ppm: 195.5, 187.9, 187.3, 174.7, 157.2, 152.9, 146.8, 142.7, 140.8, 136.1, 135.8, 135.6, 135.2, 134.2, 134.3, 131.6, 131.0, 130.6, 129.6, 129.2, 128.9, 128.3, 127.2, 126.9, 123.7, 123.6, 120.9, 117.4, 117.3.

HRMS (EI) *m/z*: [M]<sup>+</sup> calcd for C<sub>30</sub>H<sub>16</sub>O<sub>5</sub>: 456.0998 found: 456.1010.

#### 2-(2-oxo-1-(4-oxo-4H-benzo[h]chromen-3-yl)-2-phenylethylidene)-1H-indene-1,3(2H)-dione **5oa**.

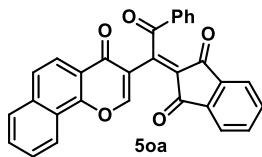

Following the **TP-C**, **5oa** was obtained from 2-((1-oxo-1H-benzo[f]chromen-2-yl)methylene)-1H-indene-1,3(2H)-dione **1o** (105.70 mg, 0.3 mmol), Me<sub>2</sub>PhP (8.54 μL, 0.2 equiv.), benzoyl chloride **2a** (41.82 μL, 1.2 equiv.), and Et<sub>3</sub>N (54.36 μL, 1.3 equiv.) in anhydrous THF (1.5 mL) at 30 °C for 0.5 h. After completion of the reaction, the residue was purified by column chromatography (SiO<sub>2</sub>, Hexanes:EtOAc = 75:25) to give **5oa** as a pale yellow solid (98.0 mg, 75%). R<sub>f</sub> = 0.40 (Hexanes:EtOAc = 7:3); mp.: 180.2-181.5 °C.

<sup>1</sup>H NMR (400 MHz, CDCl<sub>3</sub>) δ/ppm: 8.50 (s, 1H), 8.45 (d, *J* = 8.2 Hz, 1H), 8.21 (d, *J* = 8.7 Hz, 1H), 8.18-8.12 (m, 2H), 8.0-7.95 (m, 1H), 7.93 (d, *J* = 7.7 Hz, 1H), 7.91-7.87 (m, 1H), 7.85-7.76 (m, 3H), 7.75-7.64 (m, 2H), 7.80 (t, *J* = 7.4 Hz, 1H), 7.48 (t, *J* = 7.8 Hz, 2H).

<sup>13</sup>C{<sup>1</sup>H}-NMR (100 MHz, CDCl<sub>3</sub>) δ/ppm: 195.5, 187.8, 187.3, 172.8, 154.4, 153.5, 146.2, 142.7, 140.8, 136.0, 135.8, 135.7, 135.0, 134.2, 131.8, 129.7, 129.1, 128.9, 128.1, 127.1, 127.5, 126.1, 123.8, 123.7, 123.7, 122.2, 121.1, 120.2, 119.7.

HRMS (EI) *m/z*: [M]<sup>+</sup> calcd for C<sub>30</sub>H<sub>16</sub>O<sub>5</sub>: 456.0998 found: 456.0983.

**2-(2-oxo-1-(4-oxo-4H-chromen-3-yl)-2-(p-tolyl)ethylidene)-1H-indene-1,3(2H)-dione 5ab.**

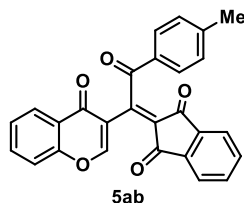

Following the TP-C, **5ab** was obtained from 2-((4-oxo-4H-chromen-3-yl)methylene)-1H-indene-1,3(2H)-dione **1a** (90.75 mg, 0.3 mmol), Me<sub>2</sub>PhP (8.54 μL, 1.2 equiv.), 4-methylbenzoyl chloride **2b** (52.35 μL, 1.2 equiv.), and Et<sub>3</sub>N (54.36 μL, 1.3 equiv.) in anhydrous THF (1.5 mL) at 30 °C for 0.5 h. After completion of the reaction, the residue was purified by column chromatography (SiO<sub>2</sub>, Hexanes:EtOAc = 80:20) to give **5ab** as a pale yellow solid (109.0 mg, 86%). R<sub>f</sub> = 0.40 (Hexanes:EtOAc = 90:10); mp.: 284.1-285.0 °C.

<sup>1</sup>H NMR (400 MHz, CDCl<sub>3</sub>) δ/ppm: 8.35-8.25 (m, 2H), 8.00 (d, *J* = 8.2 Hz, 2H), 7.96 (d, *J* = 6.6 Hz, 1H), 7.91-7.85 (m, 1H), 7.84-7.75 (m, 2H), 7.71 (td, *J* = 6.7, 1.0 Hz, 1H), 7.54-7.41 (m, 2H), 7.30-7.22 (m, 2H), 2.37 (s, 3H).

<sup>13</sup>C{<sup>1</sup>H}-NMR (100 MHz, CDCl<sub>3</sub>) δ/ppm: 194.9, 187.8, 187.4, 172.9, 155.9, 155.2, 146.4, 145.3, 142.6, 140.8, 135.8, 135.6, 134.2, 132.6, 131.4, 129.7, 129.2, 126.7, 125.9, 123.8, 123.7, 123.6, 118.6, 118.2, 21.8.

HRMS (EI) *m/z*: [M]<sup>+</sup> calcd for C<sub>27</sub>H<sub>16</sub>O<sub>5</sub>: 420.0998 found: 420.0989.

**2-(2-(4-methoxyphenyl)-2-oxo-1-(4-oxo-4H-chromen-3-yl)ethylidene)-1H-indene-1,3(2H)-dione 5ac.**

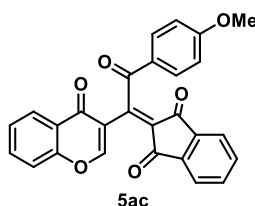

Following the TP-C, **5ac** was obtained from 2-((4-oxo-4H-chromen-3-yl)methylene)-1H-indene-1,3(2H)-dione **1a** (90.75 mg, 0.3 mmol), Me<sub>2</sub>PhP (8.54 μL, 0.2 equiv.), 4-methoxy benzoyl chloride **2c** (52.8 μL, 1.2 equiv.), and Et<sub>3</sub>N (54.36 μL, 1.3 equiv.) in anhydrous THF (1.5 mL) at 30 °C for 3 h. After completion of the reaction, the residue was purified by column chromatography (SiO<sub>2</sub>, Hexanes:EtOAc = 70:30) to give **5ac** as a pale yellow solid (115.0 mg, 88%). R<sub>f</sub> = 0.36 (Hexanes:EtOAc = 7:3); mp.: 251.9-252.8 °C.

<sup>1</sup>H NMR (400 MHz, CDCl<sub>3</sub>) δ/ppm: 8.33-8.27 (m, 1H), 8.16-8.05 (m, 2H), 7.99-7.93 (m, 1H), 7.92-7.87 (m, 1H), 7.84-7.77 (m, 2H), 7.71 (dtd, *J* = 9.4, 7.7, 1.7 Hz, 1H),

7.51-7.43 (m, 2H), 6.97-6.88 (m, 2H), 3.83 (s, 3H).

$^{13}\text{C}\{^1\text{H}\}$ -NMR (100 MHz,  $\text{CDCl}_3$ )  $\delta$ /ppm: 193.8, 187.8, 187.5, 173.0, 164.5, 156.0, 154.9, 146.4, 142.6, 140.9, 135.8, 135.6, 134.2, 131.6, 131.3, 128.2, 126.7, 125.9, 123.8, 123.7, 123.6, 118.8, 118.2, 114.4, 55.5.

HRMS (EI)  $m/z$ :  $[\text{M}]^+$  calcd for  $\text{C}_{27}\text{H}_{16}\text{O}_6$ : 436.0947 found: 436.0945.

**2-(2-oxo-1-(4-oxo-4H-benzo[h]chromen-3-yl)-2-phenylethylidene)-1H-indene-1,3(2H)-dione 5ad.**

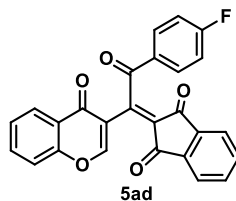

Following the TP-C, **5ad** was obtained from 2-((4-oxo-4H-chromen-3-yl)methylene)-1H-indene-1,3(2H)-dione **1a** (90.75 mg, 0.3 mmol),  $\text{Me}_2\text{PhP}$  (8.54  $\mu\text{L}$ , 0.2 equiv.), 4-fluorobenzoyl chloride **2d** (42.59  $\mu\text{L}$ , 1.2 equiv.), and  $\text{Et}_3\text{N}$  (54.36  $\mu\text{L}$ , 1.3 equiv.) in anhydrous THF (1.5 mL) at 30 °C for 0.5 h. After completion of the reaction, the residue was purified by column chromatography ( $\text{SiO}_2$ , Hexanes:EtOAc = 70:30) to give **5ad** as a pale yellow solid (110.0 mg, 86%).  $R_f$  = 0.45 (Hexanes:EtOAc = 7:3); mp.: 267.4-268.5 °C.

$^1\text{H}$  NMR (400 MHz,  $\text{CDCl}_3$ )  $\delta$ /ppm: 8.30 (s, 1H), 8.29 (dd,  $J$  = 8.0, 1.6 Hz, 1H), 8.18-8.11 (m, 2H), 7.99-7.94 (m, 1H), 7.86-7.78 (m, 2H), 7.73 (dtd,  $J$  = 9.5, 6.9, 1.7 Hz, 1H), 7.58 (t,  $J$  = 7.5 Hz, 1H), 7.75-7.45 (m, 2H), 7.19-7.10 (m, 2H).

$^{13}\text{C}\{^1\text{H}\}$ -NMR (100 MHz,  $\text{CDCl}_3$ )  $\delta$ /ppm: 193.8, 187.8, 187.2, 173.3, 167.6, 167.6, 165.1, 155.9, 155.5, 145.9, 142.6, 140.7, 135.9 (d,  $J_{\text{C-F}}$  = 17.2 Hz), 134.3, 131.8, 131.7, 131.6, 126.6, 126.1, 123.7, 123.6, 118.3, 118.3, 116.2 (d,  $J_{\text{C-F}}$  = 23.2 Hz).

$^{19}\text{F}$  NMR (376 MHz,  $\text{CDCl}_3$ )  $\delta$ /ppm: -102.8.

HRMS (EI)  $m/z$ :  $[\text{M}]^+$  calcd for.  $\text{C}_{26}\text{H}_{13}\text{O}_5\text{F}$ : 424.0747 found: 424.0764.

**2-(2-(4-chlorophenyl)-2-oxo-1-(4-oxo-4H-chromen-3-yl)ethylidene)-1H-indene-1,3(2H)-dione 5ae.**

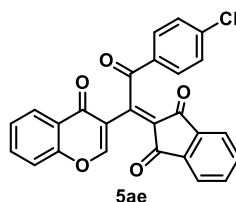

Following the TP-C, **5ae** was obtained from 2-((4-oxo-4H-chromen-3-yl)methylene)-1H-indene-1,3(2H)-dione **1a** (90.75 mg, 0.3 mmol),  $\text{Me}_2\text{PhP}$  (8.54  $\mu\text{L}$ , 0.2 equiv.), 4-

chlorobenzoyl chloride **2e** (41.82  $\mu\text{L}$ , 1.2 equiv.), and  $\text{Et}_3\text{N}$  (54.36  $\mu\text{L}$ , 1.3 equiv.) in anhydrous THF (1.5 mL) at 30  $^\circ\text{C}$  for 2 h. After completion of the reaction, the residue was purified by column chromatography ( $\text{SiO}_2$ , Hexanes:EtOAc = 70:30) to give **5ae** as a pale yellow solid (121.1 mg, 92%).  $R_f$  = 0.53 (Hexanes:EtOAc = 7:3); mp.: 196.4-197.5  $^\circ\text{C}$ .

$^1\text{H NMR}$  (400 MHz,  $\text{CDCl}_3$ )  $\delta$ /ppm: 8.32 (s, 1H), 8.27 (dd,  $J$  = 8.1, 1.5 Hz, 1H), 8.17-8.03 (m, 2H), 7.97-7.95 (m, 1H), 7.91-7.87 (m, 1H), 7.87-7.78 (m, 2H), 7.76-7.69 (m, 1H), 7.49 (t,  $J$  = 8.6 Hz, 2H), 7.46-7.41 (m, 2H).

$^{13}\text{C}\{^1\text{H}\}$ -NMR (100 MHz,  $\text{CDCl}_3$ )  $\delta$ /ppm: 194.3, 187.8, 187.2, 173.3, 155.9, 155.8, 145.9, 142.6, 140.7, 140.6, 135.9, 135.8, 134.4, 133.6, 131.6, 131.5, 130.3, 129.3, 128.8, 126.6, 126.1, 123.8, 123.7, 123.6, 118.3, 118.2.

HRMS (EI)  $m/z$ :  $[\text{M}]^+$  calcd for  $\text{C}_{26}\text{H}_{13}^{35}\text{ClO}_5$ : 440.0452 found: 440.0431.

HRMS (EI)  $m/z$ :  $[\text{M}]^+$  calcd for  $\text{C}_{26}\text{H}_{13}^{37}\text{ClO}_5$ : 442.0422 found: 442.0396.

### 2-(2-(4-bromophenyl)-2-oxo-1-(4-oxo-4H-chromen-3-yl)ethylidene)-1H-indene-1,3(2H)-dione **5af**.

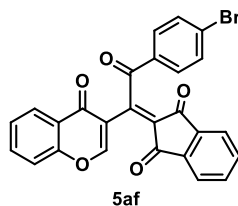

Following the **TP-C**, **5af** was obtained from 2-((4-oxo-4H-chromen-3-yl)methylene)-1H-indene-1,3(2H)-dione **1a** (90.75 mg, 0.3 mmol),  $\text{Me}_2\text{PhP}$  (8.54  $\mu\text{L}$ , 0.2 equiv.), 4-bromobenzoyl chloride **2f** (49.09 mg, 1.2 equiv.), and  $\text{Et}_3\text{N}$  (54.36  $\mu\text{L}$ , 1.3 equiv.) in anhydrous THF (1.5 mL) at 30  $^\circ\text{C}$  for 0.5 h. After completion of the reaction, the residue was purified by column chromatography ( $\text{SiO}_2$ , Hexanes:EtOAc = 70:30) to give **5af** as a pale yellow solid (110.0 mg, 75%).  $R_f$  = 0.50 (Hexanes:EtOAc = 65: 35); mp.: 236.5-237.8  $^\circ\text{C}$ .

$^1\text{H NMR}$  (400 MHz,  $\text{CDCl}_3$ )  $\delta$ /ppm: 8.32 (s, 1H), 8.28 (dd,  $J$  = 7.9, 1.3 Hz, 1H), 7.97 (d,  $J$  = 8.6 Hz, 3H), 7.92-7.76 (m, 1H), 7.86-7.77 (m, 2H), 7.73 (dtd,  $J$  = 8.7, 6.7, 1.5 Hz, 1H), 7.61 (d,  $J$  = 8.6 Hz, 2H), 7.53-7.44 (m, 2H).

$^{13}\text{C}\{^1\text{H}\}$ -NMR (100 MHz,  $\text{CDCl}_3$ )  $\delta$ /ppm: 194.5, 187.8, 187.2, 173.3, 155.9, 155.9, 145.9, 142.7, 140.7, 135.9, 135.8, 134.4, 134.1, 132.3, 131.7, 130.4, 129.5, 126.6, 126.1, 123.8, 123.6, 123.7, 118.3, 118.2.

HRMS (EI)  $m/z$ :  $[\text{M}]^+$  calcd for  $\text{C}_{26}\text{H}_{13}^{79}\text{BrO}_5$ : 483.9946 found: 483.9971.

HRMS (EI)  $m/z$ :  $[\text{M}]^+$  calcd for  $\text{C}_{26}\text{H}_{13}^{81}\text{BrO}_5$ : 485.9926 found: 485.9979.

**2-(2-(3-bromophenyl)-2-oxo-1-(4-oxo-4H-chromen-3-yl)ethylidene)-1H-indene-1,3(2H)-dione 5ag.**

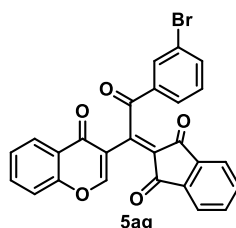

Following the **TP-C**, **5ag** was obtained from 2-((4-oxo-4H-chromen-3-yl)methylene)-1H-indene-1,3(2H)-dione **1a** (90.75 mg, 0.3 mmol), Me<sub>2</sub>PhP (8.54 μL, 0.2 equiv.), 3-bromobenzoyl chloride **2g** (47.53 μL, 1.2 equiv.), and Et<sub>3</sub>N (54.36 μL, 1.3 equiv.) in anhydrous THF (1.5 mL) at 30 °C for 0.5 h. After completion of the reaction, the residue was purified by column chromatography (SiO<sub>2</sub>, Hexanes:EtOAc = 70:30) to give **5ag** as a pale yellow solid (120.0 mg, 82%). R<sub>f</sub> = 0.48 (Hexanes:EtOAc = 7:3); mp.: 250.1-251.3 °C.

<sup>1</sup>H NMR (400 MHz, CDCl<sub>3</sub>) δ/ppm: 8.32 (s, 1H), 8.31-8.34 (m, 2H), 8.01-7.95 (m, 2H), 7.98-7.86 (m, 1H), 7.85-7.77 (m, 2H), 7.72 (dtd, *J* = 9.2, 7.7, 1.7 Hz, 1H), 7.78-7.66 (m, 1H), 7.50 (d, *J* = 8.5 Hz, 1H), 7.56-7.44 (m, 1H), 7.32 (t, *J* = 7.9 Hz, 1H).

<sup>13</sup>C{<sup>1</sup>H}-NMR (100 MHz, CDCl<sub>3</sub>) δ/ppm: 194.2, 187.8, 187.1, 173.3, 156.2, 155.9, 145.9, 142.7, 140.6, 136.9, 136.8, 135.9, 135.8, 134.4, 131.7, 131.3, 130.4, 127.9, 126.6, 126.1, 123.8, 123.7, 123.2, 118.3, 118.1.

HRMS (EI) *m/z*: [M]<sup>+</sup> calcd for C<sub>26</sub>H<sub>13</sub><sup>79</sup>BrO<sub>5</sub>: 483.9946 found: 483.9931.

HRMS (EI) *m/z*: [M]<sup>+</sup> calcd for C<sub>26</sub>H<sub>13</sub><sup>81</sup>BrO<sub>5</sub>: 485.9926 found: 485.9912.

**2-(2-(2-bromophenyl)-2-oxo-1-(4-oxo-4H-chromen-3-yl)ethylidene)-1H-indene-1,3(2H)-dione 5ah.**

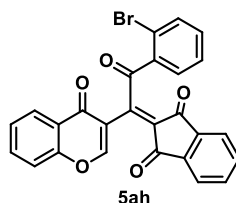

Following the **TP-C**, **5ah** was obtained from 2-((4-oxo-4H-chromen-3-yl)methylene)-1H-indene-1,3(2H)-dione **1a** (90.75 mg, 0.3 mmol), Me<sub>2</sub>PhP (8.54 μL, 0.2 equiv.), 2-bromobenzoyl chloride **2h** (59.49 μL, 1.2 equiv.), and Et<sub>3</sub>N (54.36 μL, 1.3 equiv.) in anhydrous THF (1.5 mL) at 30 °C for 2 h. After completion of the reaction, the residue was purified by column chromatography (SiO<sub>2</sub>, Hexanes:EtOAc = 70:30) to give **5ah** as a pale yellow solid (113.0 mg, 77%). R<sub>f</sub> = 0.38 (Hexanes:EtOAc = 7:3); mp.: 242.2-243.3 °C.

<sup>1</sup>H NMR (400 MHz, CDCl<sub>3</sub>) δ/ppm: 8.48 (s, 1H), 8.26 (dd, *J* = 8.0, 1.4 Hz, 1H), 8.08

(dd,  $J = 7.5, 1.9$  Hz, 1H), 7.99-7.92 (m, 1H), 7.91-7.86 (m, 1H), 7.85-7.78 (m, 2H), 7.75-7.70 (m, 1H), 7.53 (d,  $J = 8.3$  Hz, 1H), 7.47 (t,  $J = 7.9$  Hz, 1H), 7.42-7.31 (m, 2H).  $^{13}\text{C}\{^1\text{H}\}$ -NMR (100 MHz,  $\text{CDCl}_3$ )  $\delta$ /ppm: 193.7, 188.0, 187.5, 173.6, 157.2, 155.9, 147.0, 142.5, 140.5, 135.8, 135.7, 135.4, 134.8, 134.4, 133.6, 133.3, 130.8, 127.4, 126.6, 126.1, 123.8, 123.7, 122.2, 118.4, 118.3.

HRMS (EI)  $m/z$ :  $[\text{M}]^+$  calcd for  $\text{C}_{26}\text{H}_{13}^{79}\text{BrO}_5$ : 483.9946 found: 483.9935.

HRMS (EI)  $m/z$ :  $[\text{M}]^+$  calcd for  $\text{C}_{26}\text{H}_{13}^{81}\text{BrO}_5$ : 485.9926 found: 485.9921.

#### 4-(2-(1,3-dioxo-1,3-dihydro-2H-inden-2-ylidene)-2-(4-oxo-4H-chromen-3-yl)acetyl)benzonitrile **5ai**.

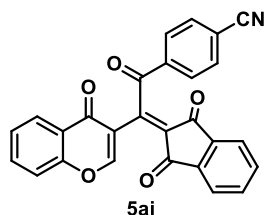

Following the **TP-C**, **5ai** was obtained from 2-((4-oxo-4H-chromen-3-yl)methylene)-1H-indene-1,3(2H)-dione **1a** (90.75 mg, 0.3 mmol),  $\text{Me}_2\text{PhP}$  (8.54  $\mu\text{L}$ , 0.2 equiv.), 4-cyanobenzoyl chloride **2i** (59.0 mg, 1.2 equiv.), and  $\text{Et}_3\text{N}$  (54.36  $\mu\text{L}$ , 1.3 equiv.) in anhydrous THF (1.5 mL) at 30  $^\circ\text{C}$  for 2 h. After completion of the reaction, the residue was purified by column chromatography ( $\text{SiO}_2$ , Hexanes:EtOAc = 65:35) to give **5ai** as a yellow solid (84.0 mg, 65%).  $R_f = 0.50$  (Hexanes:EtOAc = 5:5); mp.: 265.1-266.1  $^\circ\text{C}$ .

$^1\text{H}$  NMR (400 MHz,  $\text{CDCl}_3$ )  $\delta$ /ppm: 8.42 (s, 1H), 8.27-8.16 (m, 3H), 7.99 (d,  $J = 7.1$  Hz, 1H), 7.90-7.80 (m, 3H), 7.79-7.71 (m, 3H), 7.54 (d,  $J = 8.5$  Hz, 1H), 7.47 (t,  $J = 7.6$  Hz, 1H).

$^{13}\text{C}\{^1\text{H}\}$ -NMR (100 MHz,  $\text{CDCl}_3$ )  $\delta$ /ppm: 194.3, 187.9, 187.0, 173.9, 157.4, 155.9, 146.1, 142.6, 140.4, 138.6, 136.2, 136.0, 134.6, 132.6, 131.7, 129.1, 126.5, 126.3, 126.5, 126.3, 123.9, 123.7, 123.6, 118.3, 117.9, 116.7.

HRMS (MALDI)  $m/z$ :  $[\text{M}+\text{H}]^+$  calcd for  $\text{C}_{27}\text{H}_{14}\text{NO}_5$ : 432.0872 found: 432.0867.

#### 2-(2-(naphthalen-1-yl)-2-oxo-1-(4-oxo-4H-chromen-3-yl)ethylidene)-1H-indene-1,3(2H)-dione **5aj**.

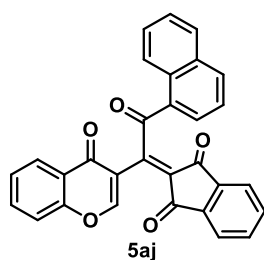

Following the **TP-C**, **5aj** was obtained from 2-((4-oxo-4H-chromen-3-yl)methylene)-1H-indene-1,3(2H)-dione **1a** (90.75 mg, 0.3 mmol), Me<sub>2</sub>PhP (8.54 μL, 0.2 equiv.), 1-naphthoyl chloride **2j** (54.24 μL, 1.2 equiv.), and Et<sub>3</sub>N (54.36 μL, 1.3 equiv.) in anhydrous THF (1.5 mL) at 30 °C for 2 h. After completion of the reaction, the residue was purified by column chromatography (SiO<sub>2</sub>, Hexanes:EtOAc = 75:25) to give **5aj** as a pale yellow solid (117.0 mg, 85%). R<sub>f</sub> = 0.43 (Hexanes:EtOAc = 7:3); mp.: 190.3-191.5 °C.

<sup>1</sup>H NMR (400 MHz, CDCl<sub>3</sub>) δ/ppm: 9.43 (d, *J* = 6.8 Hz, 1H), 8.41 (s, 1H), 8.34 (dd, *J* = 8.5, 1.1 Hz, 1H), 8.26 (d, *J* = 7.1 Hz, 1H), 8.03 (d, *J* = 8.2 Hz, 1H), 7.94 (d, *J* = 7.4 Hz, 1H), 7.89 (d, *J* = 7.9 Hz, 1H), 7.85-7.67 (m, 5H), 7.60 (t, *J* = 7.8 Hz, 1H), 7.51-7.41 (m, 3H).

<sup>13</sup>C{<sup>1</sup>H}-NMR (100 MHz, CDCl<sub>3</sub>) δ/ppm: 197.1, 188.1, 187.7, 173.1, 156.0, 154.7, 146.9, 142.7, 140.8, 135.7, 135.6, 135.2, 134.2, 134.0, 133.7, 131.0, 130.9, 130.7, 129.2, 128.6, 126.8, 126.7, 126.2, 125.9, 124.7, 123.8, 123.7, 123.6, 119.2, 118.2.

HRMS (EI) *m/z*: [M]<sup>+</sup> calcd for C<sub>27</sub>H<sub>16</sub>O<sub>5</sub>: 456.0998 found: 456.0984.

#### 2-(3-methyl-2-oxo-1-(4-oxo-4H-chromen-3-yl)butylidene)-1H-indene-1,3(2H)-dione **5ak**.

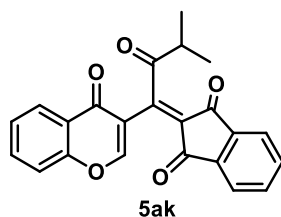

Following the **TP-C**, **5ak** was obtained from 2-((4-oxo-4H-chromen-3-yl)methylene)-1H-indene-1,3(2H)-dione **1a** (90.75 mg, 0.3 mmol), Me<sub>2</sub>PhP (8.54 μL, 0.2 equiv.), isobutyryl chloride **2k** (37.7 μL, 1.2 equiv.), and Et<sub>3</sub>N (54.36 μL, 1.3 equiv.) in anhydrous THF (1.5 mL) at 30 °C for 0.5 h. After completion of the reaction, the residue was purified by column chromatography (SiO<sub>2</sub>, Hexanes:EtOAc = 70:30) to give **5ak** as a pale yellow solid (62.0 mg, 55%). R<sub>f</sub> = 0.48 (Hexanes:EtOAc = 7:3); mp.: 200.1-201.2 °C.

<sup>1</sup>H NMR (400 MHz, CDCl<sub>3</sub>) δ/ppm: 8.30 (dd, *J* = 8.0, 1.5 Hz, 1H), 8.17 (s, 1H), 7.99-7.95 (m, 1H), 7.93-7.89 (m, 1H), 7.85-7.78 (m, 2H), 7.85-7.75 (m, 2H), 7.73 (td, *J* = 8.8, 7.4, 1.6 Hz, 1H), 7.53-7.45 (m, 2H), 3.13 (sep, *J* = 7.01 Hz, 1H), 1.26 (brs, 3H), 1.24 (brs, 3H).

<sup>13</sup>C{<sup>1</sup>H}-NMR (100 MHz, CDCl<sub>3</sub>) δ/ppm: 209.8, 188.5, 187.3, 173.1, 155.9, 154.4, 147.8, 142.5, 140.7, 135.9, 135.7, 134.2, 130.4, 126.7, 126.0, 123.7, 123.6, 123.5, 118.6, 118.2, 41.1, 17.6.

HRMS (EI) *m/z*: [M]<sup>+</sup> calcd for. C<sub>23</sub>H<sub>16</sub>O<sub>5</sub>: 372.0998 found: 372.0981.



**1-oxo-2-((4-oxo-4H-chromen-3-yl)(tributylphosphonio)methyl)-1H-inden-3-olate**  
**4**

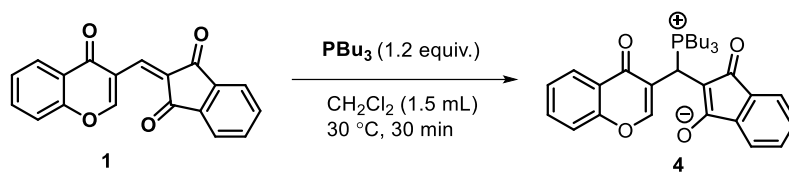

A 50 mL round-bottomed flask equipped with a magnetic stir bar was charged with 2-((4-oxo-4H-chromen-3-yl)methylene)-1H-indene-1,3(2H)-dione **1a** (90.75 mg, 0.3 mmol),  $\text{PBu}_3$  (88.8  $\mu\text{L}$ , 1.2 equiv.) in anhydrous  $\text{CH}_2\text{Cl}_2$  (15 mL). The reaction mixture was stirred for 30 minutes at 30 °C. After completion of the reaction, the residue was purified by column chromatography ( $\text{SiO}_2$ ,  $\text{DCM}:\text{MeOH} = 90:10$ ) to give **4** as a pale yellow solid (138.0 mg, 92%).  $R_f = 0.45$  ( $\text{DCM}:\text{MeOH} = 9.5:0.5$ ); mp.: 227.1-228.4 °C.  $^1\text{H NMR}$  (400 MHz,  $\text{CDCl}_3$ )  $\delta$ /ppm: 8.86 (d,  $J = 3.8$  Hz, 1H), 8.21 (dtd,  $J = 8.6, 7.0, 1.6$  Hz, 1H), 7.47 (d,  $J = 8.4$  Hz, 1H), 7.43 (t,  $J = 7.4$  Hz, 1H), 7.40-7.36 (m, 2H), 7.35-7.23 (m, 2H), 5.35 (d,  $J = 18.5$  Hz, 1H), 2.38-2.13 (m, 6H), 1.66-1.34 (m, 12H), 0.87 (t,  $J = 7.3$  Hz, 9H).

$^{13}\text{C}\{^1\text{H}\}$ -NMR (100 MHz,  $\text{CDCl}_3$ )  $\delta$ /ppm: 190.7, 190.6, 177.0, 159.2 (d,  $^2J_{\text{C-P}} = 6.2$  Hz), 156.2, 139.3, 133.9, 130.0, 125.7 (d,  $^2J_{\text{C-P}} = 29.7$  Hz), 123.1, 120.4, 118.3, 118.1, 96.5 (d,  $^3J_{\text{C-P}} = 3.3$  Hz), 27.6 (d,  $^1J_{\text{C-P}} = 64.7$  Hz), 25.2 (d,  $^2J_{\text{C-P}} = 46.9$  Hz), 24.8, 24.1, 23.9, 20.4 (d,  $^3J_{\text{C-P}} = 43.9$  Hz), 13.3.

$^{31}\text{P NMR}$  (162 MHz,  $\text{CDCl}_3$ )  $\delta$ /ppm: 36.9.

HRMS (MALDI)  $m/z$ :  $[\text{M}]^+$  calcd for.  $\text{C}_{31}\text{H}_{37}\text{O}_4\text{P}$ : 504.2429 found: 504.2424.

**tributyl(10,12-dioxo-11,12-dihydro-10H-benzo[5,6]pentaleno[1,2-b]chromen-11-yl)phosphonium trifluoromethanesulfonate 7.**

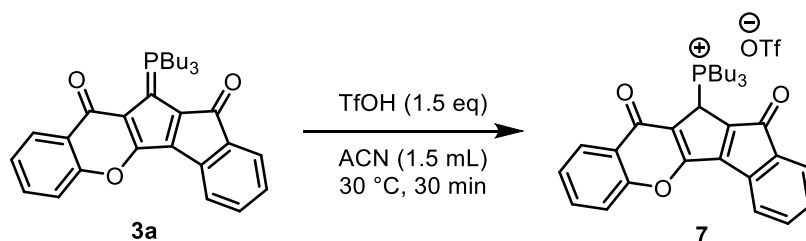

A 50 mL round-bottomed flask equipped with a magnetic stir bar was charged with 11-(tributyl- $\lambda^5$ -phosphanylidene)-10H-benzo[5,6]pentaleno[1,2-b]chromene-10,12(11H)-dione **3a** (90.75 mg, 0.15 mmol), Trifluoromethanesulfonic acid (1.2 equiv.) in acetonitrile (1.5 mL). The reaction mixture was stirred for 30 minutes at 30 °C and monitored by TLC. After completion of the reaction, the solvent was removed in *vacuo*

and the crude compound was without purification to give **7** as a purple solid (85.0 mg, 90%).  $R_f = 0.35$  (Hexanes:EtOAc = 9:1); mp.: 170.9-171.8 °C.

$^1\text{H NMR}$  (400 MHz,  $\text{CDCl}_3$ )  $\delta$ /ppm: 8.61 (d,  $J = 8.1$  Hz, 1H), 7.86 (d,  $J = 7.6$  Hz, 1H), 7.69 (d,  $J = 8.3$  Hz, 1H), 7.65-7.43 (m, 4H), 7.22-7.09 (m, 1H), 2.87-2.54 (m, 6H), 1.71-1.35 (m, 12H), 0.94 (t,  $J = 6.8$  Hz, 9H).

$^{13}\text{C}\{^1\text{H}\}$ -NMR (100 MHz,  $\text{CDCl}_3$ )  $\delta$ /ppm: 189.0, 164.2, 155.8, 147.8(d,  $^3J_{\text{C-P}} = 7.6$  Hz), 146.8(d,  $^3J_{\text{C-P}} = 8.5$  Hz), 140.1, 138.4, 135.7, 135.3, 126.6, 125.9, 125.3, 125.1, 124.9, 120.9, 120.3 (q,  $J_{\text{C-F}} = 320.3$  Hz) 119.6 (d,  $^2J_{\text{C-P}} = 9.9$  Hz), 118.4 (d,  $^2J_{\text{C-P}} = 12.1$  Hz), 117.9, 114.9, 86.5 (d,  $^1J_{\text{C-P}} = 98.2$  Hz), 24.2 (d,  $^3J_{\text{C-P}} = 4.2$  Hz), 23.6 (d,  $^2J_{\text{C-P}} = 15.9$  Hz), 21.5, (d,  $^1J_{\text{C-P}} = 51.3$  Hz), 13.4.

$^{31}\text{P NMR}$  (162 MHz,  $\text{CDCl}_3$ )  $\delta$ /ppm: 24.9.

$^{19}\text{F NMR}$  (376 MHz,  $\text{CDCl}_3$ )  $\delta$ /ppm: -78.2.

HRMS (MALDI)  $m/z$ :  $[\text{M}+\text{Na}]^+$  calcd for  $\text{C}_{32}\text{H}_{36}\text{F}_3\text{O}_6\text{PSNa}$ : 659.1820 found: 659.1814.

### 12-hydroxy-11-(tributyl- $\lambda^5$ -phosphanylidene)-11,12-dihydro-10H-benzo[5,6]pentaleno[1,2-b]chromen-10-one

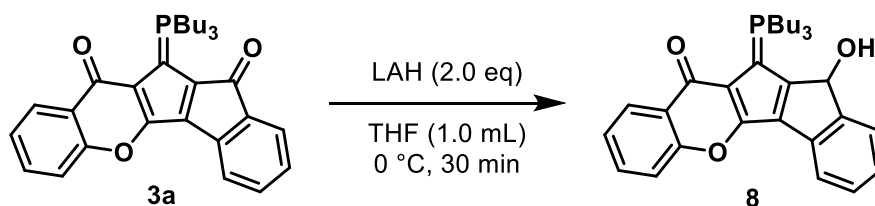

A 50 mL round-bottomed flask equipped with a magnetic stir bar was charged with LAH (11.0 mg, 2.0 equiv.) in anhydrous THF (0.5 mL) at 0 °C and 11-(tributyl- $\lambda^5$ -phosphanylidene)-10H-benzo[5,6]pentaleno[1,2-b]chromene-10,12(11H)-dione **3a** (73.0 mg, 0.15 mmol) dissolved in anhydrous THF (0.5 mL) adding to reaction mixture. The reaction mixture was stirred for 30 minutes at 0 °C and monitored by TLC. After completion of the reaction, the residue was purified by column chromatography ( $\text{SiO}_2$ , Hexanes:EtOAc = 80:20) to give **8** as a yellow solid (59.0 mg, 80%).  $R_f = 0.38$  (Hexanes:EtOAc = 7:3); mp.: 172.9-173.8 °C.

$^1\text{H NMR}$  (400 MHz, DMSO)  $\delta$ /ppm: 8.18 (dd,  $J = 7.9, 1.2$  Hz, 1H), 7.65-7.59 (m, 1H), 7.58-7.54 (m, 1H), 7.43-7.36 (m, 2H), 7.31 (t,  $J = 7.2$  Hz, 1H), 7.23 (t,  $J = 7.4$  Hz, 1H), 6.98 (t,  $J = 7.4$  Hz, 1H), 5.60 (d,  $J = 8.8$  Hz, 1H), 5.38 (d,  $J = 8.8$  Hz, 1H), 2.68-2.50 (m, 6H), 1.54-1.26 (m, 12H), 0.84 (t,  $J = 6.9$  Hz, 1H).

$^{13}\text{C}\{^1\text{H}\}$ -NMR (100 MHz, DMSO)  $\delta$ /ppm: 169.7, 154.8, 148.8, 148.6 (d,  $^3J_{\text{C-P}} = 9.6$  Hz), 144.8 (d,  $^2J_{\text{C-P}} = 11.5$  Hz), 137.8, 131.1, 128.1, 125.6, 124.7, 122.9, 122.6, 122.2, 117.4, 117.0, 116.4 (d,  $^2J_{\text{C-P}} = 13.4$  Hz), 115.7 (d,  $^3J_{\text{C-P}} = 12.5$  Hz), 74.8 (d,  $^1J_{\text{C-P}} = 107.4$  Hz), 70.6, 23.3 (d,  $^3J_{\text{C-P}} = 4.4$  Hz), 23.2 (d,  $^2J_{\text{C-P}} = 7.6$  Hz), 19.7 (d,  $^1J_{\text{C-P}} = 53.4$  Hz), 13.3.

$^{31}\text{P}$  NMR (162 MHz,  $\text{CDCl}_3$ )  $\delta$ /ppm: 22.1.

HRMS (MALDI)  $m/z$ :  $[\text{M}]^+$  calcd for.  $\text{C}_{31}\text{H}_{37}\text{O}_3\text{P}$ : 488.2480 found: 488.2475.

**2-(1-benzyl-4-oxo-2-phenyl-1,4-dihydrochromeno[2,3-b]pyrrol-3-yl)-1H-indene-1,3(2H)-dione **9**.**

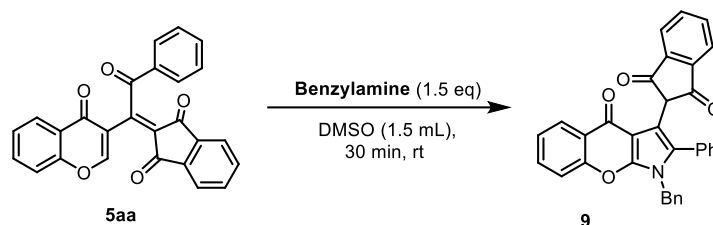

A 50 mL round-bottomed flask equipped with a magnetic stir bar was charged with 2-((4-oxo-4H-chromen-3-yl)methylene)-1H-indene-1,3(2H)-dione **5aa** (61.0 mg, 0.15 mmol), and benzylamine (25.0  $\mu\text{L}$ , 1.5 equiv.) in DMSO (0.75 mL). The reaction mixture was stirred for 30 minutes at 30  $^\circ\text{C}$ . After completion of the reaction, the residue was purified by column chromatography ( $\text{SiO}_2$ , Hexanes:EtOAc = 65:35) to give **9** as an Off-white solid (56.0 mg, 75%).  $R_f$  = 0.40 (Hexanes:EtOAc = 7:3); mp.: 211.0-212.2  $^\circ\text{C}$ .

$^1\text{H}$  NMR (400 MHz,  $\text{CDCl}_3$ )  $\delta$ /ppm: 8.11 (dd,  $J$  = 8.0, 1.5 Hz, 1H), 8.09-8.03 (m, 2H), 7.98-7.83 (m, 2H), 7.55 (td,  $J$  = 8.9, 6.8, 1.5 Hz, 1H), 7.52-7.46 (m, 2H), 7.45-7.37 (m, 4H), 7.34-7.24 (m, 4H), 7.07 (d,  $J$  = 6.8 Hz, 1H), 5.26 (s, 2H), 4.28 (s, 1H).

$^{13}\text{C}\{^1\text{H}\}$ -NMR (100 MHz,  $\text{CDCl}_3$ )  $\delta$ /ppm: 198.1, 172.9, 154.2, 149.8, 142.3, 136.1, 135.2, 133.5, 132.4, 131.3, 129.2, 128.9, 128.8, 128.6, 127.9, 126.8, 126.7, 124.2, 123.3, 123.2, 117.2, 107.1, 104.3, 53.8, 46.8.

HRMS (EI)  $m/z$ :  $[\text{M}]^+$  calcd for.  $\text{C}_{33}\text{H}_{21}\text{NO}_4$ : 495.1471 found: 495.1457.

## References

1. D. Kumbhar, R. Patil, D. Patil, A. Patravale, D. Chandam, S. Jadhav, M. Deshmukh, *Synth. Commun.*, 2016, **46**, 85-92.
2. L. Pellegatti, S. L. Buchwald, *Org. Process Res. Dev.*, 2012, **16**, 1442-1448.
3. T. Lepitre, C. Denhez, M. Sanselme, M. Othman, A. M. Lawson, A Daich, *J. Org. Chem.*, 2016, **18**, 8837-8849.

## VII. X-ray crystallographic data for selected compounds

a) Crystal Data and Structure Refinement for compound **3a** (CCDC no. 2360174):

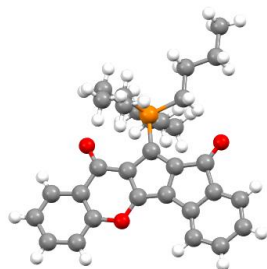

The purified compound **3a** was dissolved in a minimal amount of CH<sub>2</sub>Cl<sub>2</sub> in a glass vial. Hexanes were then added until the solution became turbid. The solution was allowed to slowly evaporate. After a few days, a dark red color crystals were obtained.

|                                   |                                                  |                 |
|-----------------------------------|--------------------------------------------------|-----------------|
| Empirical formula                 | C <sub>31</sub> H <sub>35</sub> O <sub>3</sub> P |                 |
| Formula weight                    | 486.56                                           |                 |
| Temperature                       | 200(2) K                                         |                 |
| Wavelength                        | 0.71073 Å                                        |                 |
| Crystal system                    | Monoclinic                                       |                 |
| Space group                       | P 21/c                                           |                 |
| Unit cell dimensions              | a = 12.4838(16) Å                                | α = 90°.        |
|                                   | b = 21.180(2) Å                                  | β = 96.690(4)°. |
|                                   | c = 10.3247(11) Å                                | γ = 90°.        |
| Volume                            | 2711.4(5) Å <sup>3</sup>                         |                 |
| Z                                 | 4                                                |                 |
| Density (calculated)              | 1.192 Mg/m <sup>3</sup>                          |                 |
| Absorption coefficient            | 0.131 mm <sup>-1</sup>                           |                 |
| F(000)                            | 1040                                             |                 |
| Crystal size                      | 0.24 x 0.21 x 0.02 mm <sup>3</sup>               |                 |
| Theta range for data collection   | 2.53 to 25.06°.                                  |                 |
| Index ranges                      | -14 ≤ h ≤ 14, -25 ≤ k ≤ 25, -12 ≤ l ≤ 12         |                 |
| Reflections collected             | 25869                                            |                 |
| Independent reflections           | 4800 [R(int) = 0.0956]                           |                 |
| Completeness to theta = 25.06°    | 99.8 % Absorption correction multi-scan          |                 |
| Max. and min. transmission        | 0.9974 and 0.9693                                |                 |
| Refinement method                 | Full-matrix least-squares on F <sup>2</sup>      |                 |
| Data / restraints / parameters    | 4800 / 0 / 319                                   |                 |
| Goodness-of-fit on F <sup>2</sup> | 1.017                                            |                 |
| Final R indices [I > 2σ(I)]       | R1 = 0.0534, wR2 = 0.1240                        |                 |
| R indices (all data)              | R1 = 0.0872, wR2 = 0.1428                        |                 |
| Largest diff. peak and hole       | 0.214 and -0.345 e.Å <sup>-3</sup>               |                 |

b) Crystal Data and Structure Refinement for compound **5aa** (CCDC no. 2360188):

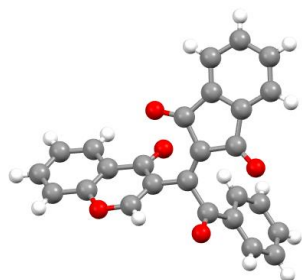

The purified compound **5aa** was dissolved in a minimal amount of CH<sub>2</sub>Cl<sub>2</sub> in a glass vial. Hexanes were then added until the solution became turbid. The solution was allowed to slowly evaporate. After a few days, a pale yellow color crystals were obtained.

|                                   |                                                |                    |
|-----------------------------------|------------------------------------------------|--------------------|
| Empirical formula                 | C <sub>26</sub> H <sub>14</sub> O <sub>5</sub> |                    |
| Formula weight                    | 406.37                                         |                    |
| Temperature                       | 200(2) K                                       |                    |
| Wavelength                        | 0.71073 Å                                      |                    |
| Crystal system                    | Monoclinic                                     |                    |
| Space group                       | P 21/c                                         |                    |
| Unit cell dimensions              | a = 19.4485(7) Å                               | α = 90°.           |
|                                   | b = 6.3637(2) Å                                | β = 105.2800(10)°. |
|                                   | c = 15.7718(5) Å                               | γ = 90°.           |
| Volume                            | 1882.98(11) Å <sup>3</sup>                     |                    |
| Z                                 | 4                                              |                    |
| Density (calculated)              | 1.433 Mg/m <sup>3</sup>                        |                    |
| Absorption coefficient            | 0.100 mm <sup>-1</sup>                         |                    |
| F(000)                            | 840                                            |                    |
| Crystal size                      | 0.41 x 0.20 x 0.04 mm <sup>3</sup>             |                    |
| Theta range for data collection   | 2.68 to 25.10°.                                |                    |
| Index ranges                      | -23 ≤ h ≤ 23, -7 ≤ k ≤ 7, -18 ≤ l ≤ 18         |                    |
| Reflections collected             | 19261                                          |                    |
| Independent reflections           | 3344 [R(int) = 0.0838]                         |                    |
| Completeness to theta = 25.10°    | 99.3 %                                         |                    |
| Absorption correction             | multi-scan                                     |                    |
| Max. and min. transmission        | 0.9960 and 0.9602                              |                    |
| Refinement method                 | Full-matrix least-squares on F <sup>2</sup>    |                    |
| Data / restraints / parameters    | 3344 / 0 / 280                                 |                    |
| Goodness-of-fit on F <sup>2</sup> | 1.023                                          |                    |
| Final R indices [I > 2σ(I)]       | R1 = 0.0443, wR2 = 0.1107                      |                    |
| R indices (all data)              | R1 = 0.0584, wR2 = 0.1239                      |                    |
| Largest diff. peak and hole       | 0.219 and -0.184 e.Å <sup>-3</sup>             |                    |

c) Crystal Data and Structure Refinement for compound **4** (CCDC no. 2360233):

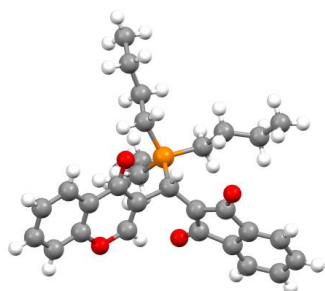

The purified compound **4** was dissolved in a minimal amount of CH<sub>2</sub>Cl<sub>2</sub> in a glass vial. Hexanes were then added until the solution became turbid. The solution was allowed to slowly evaporate. After a few days, a pale yellow color crystals were obtained.

|                                   |                                                  |                  |
|-----------------------------------|--------------------------------------------------|------------------|
| Empirical formula                 | C <sub>31</sub> H <sub>36</sub> O <sub>4</sub> P |                  |
| Formula weight                    | 503.57                                           |                  |
| Temperature                       | 200(2) K                                         |                  |
| Wavelength                        | 0.71073 Å                                        |                  |
| Crystal system                    | Monoclinic                                       |                  |
| Space group                       | P 21/n                                           |                  |
| Unit cell dimensions              | a = 9.6734(4) Å                                  | α = 90°.         |
|                                   | b = 14.6130(6) Å                                 | β = 101.356(2)°. |
|                                   | c = 19.9002(9) Å                                 | γ = 90°.         |
| Volume                            | 2758.0(2) Å <sup>3</sup>                         |                  |
| Z                                 | 4                                                |                  |
| Density (calculated)              | 1.213 Mg/m <sup>3</sup>                          |                  |
| Absorption coefficient            | 0.133 mm <sup>-1</sup>                           |                  |
| F(000)                            | 1076                                             |                  |
| Crystal size                      | 0.13 x 0.10 x 0.03 mm <sup>3</sup>               |                  |
| Theta range for data collection   | 2.20 to 25.38°.                                  |                  |
| Index ranges                      | -11 ≤ h ≤ 11, -17 ≤ k ≤ 17, -23 ≤ l ≤ 23         |                  |
| Reflections collected             | 31956                                            |                  |
| Independent reflections           | 5064 [R(int) = 0.0799]                           |                  |
| Completeness to theta = 25.38°    | 99.8 %                                           |                  |
| Absorption correction             | multi-scan                                       |                  |
| Max. and min. transmission        | 0.9960 and 0.9829                                |                  |
| Refinement method                 | Full-matrix least-squares on F <sup>2</sup>      |                  |
| Data / restraints / parameters    | 5064 / 0 / 327                                   |                  |
| Goodness-of-fit on F <sup>2</sup> | 1.054                                            |                  |
| Final R indices [I > 2σ(I)]       | R1 = 0.0684, wR2 = 0.1967                        |                  |
| R indices (all data)              | R1 = 0.1036, wR2 = 0.2344                        |                  |
| Largest diff. peak and hole       | 1.277 and -0.440 e.Å <sup>-3</sup>               |                  |

d) Crystal Data and Structure Refinement for compound **8** (CCDC no. 2363295):

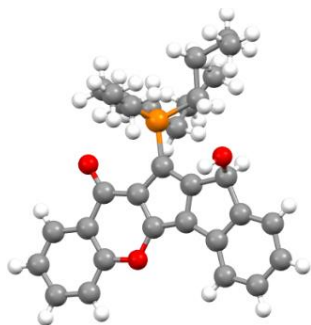

The purified compound **4** was dissolved in a minimal amount of CH<sub>2</sub>Cl<sub>2</sub> in a glass vial. Hexanes were then added until the solution became turbid. The solution was allowed to slowly evaporate. After a few days, a pale yellow color crystals were obtained.

|                                   |                                                  |                 |
|-----------------------------------|--------------------------------------------------|-----------------|
| Empirical formula                 | C <sub>31</sub> H <sub>37</sub> O <sub>3</sub> P |                 |
| Formula weight                    | 488.58                                           |                 |
| Temperature                       | 200(2) K                                         |                 |
| Wavelength                        | 0.71073 Å                                        |                 |
| Crystal system                    | Monoclinic                                       |                 |
| Space group                       | P 21/n                                           |                 |
| Unit cell dimensions              | a = 11.3575(5) Å                                 | α = 90°.        |
|                                   | b = 11.1326(5) Å                                 | β = 97.976(2)°. |
|                                   | c = 21.2159(11) Å                                | γ = 90°.        |
| Volume                            | 2656.6(2) Å <sup>3</sup>                         |                 |
| Z                                 | 4                                                |                 |
| Density (calculated)              | 1.222 Mg/m <sup>3</sup>                          |                 |
| Absorption coefficient            | 0.134 mm <sup>-1</sup>                           |                 |
| F(000)                            | 1048                                             |                 |
| Crystal size                      | 0.22 x 0.09 x 0.03 mm <sup>3</sup>               |                 |
| Theta range for data collection   | 2.07 to 25.05°.                                  |                 |
| Index ranges                      | -13 ≤ h ≤ 13, -13 ≤ k ≤ 13, -25 ≤ l ≤ 23         |                 |
| Reflections collected             | 24725                                            |                 |
| Independent reflections           | 4697 [R(int) = 0.0721]                           |                 |
| Completeness to theta = 25.05°    | 99.9 %                                           |                 |
| Absorption correction             | None                                             |                 |
| Max. and min. transmission        | 0.9960 and 0.9712                                |                 |
| Refinement method                 | Full-matrix least-squares on F <sup>2</sup>      |                 |
| Data / restraints / parameters    | 4697 / 0 / 319                                   |                 |
| Goodness-of-fit on F <sup>2</sup> | 1.029                                            |                 |
| Final R indices [I > 2σ(I)]       | R1 = 0.0442, wR2 = 0.1230                        |                 |
| R indices (all data)              | R1 = 0.0590, wR2 = 0.1386                        |                 |
| Largest diff. peak and hole       | 0.199 and -0.331 e.Å <sup>-3</sup>               |                 |

## VIII. $^1\text{H}$ , $^{13}\text{C}$ NMR, $^{19}\text{F}$ NMR and $^{31}\text{P}$ NMR spectra for all compounds

### $^1\text{H}$ NMR spectrum of compound **1a** ( $\text{CDCl}_3$ , 400 MHz)

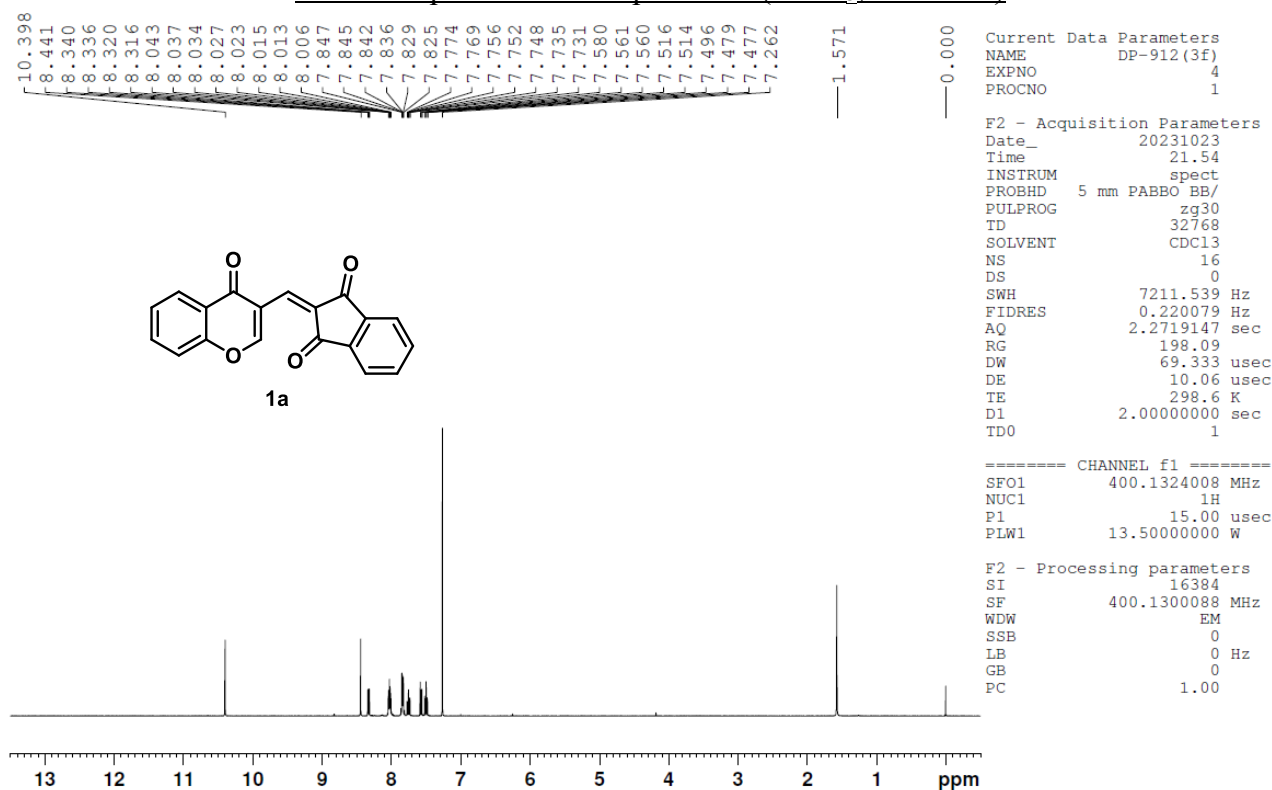

### $^{13}\text{C}$ NMR spectrum of compound **1a** ( $\text{CDCl}_3$ , 100 MHz)

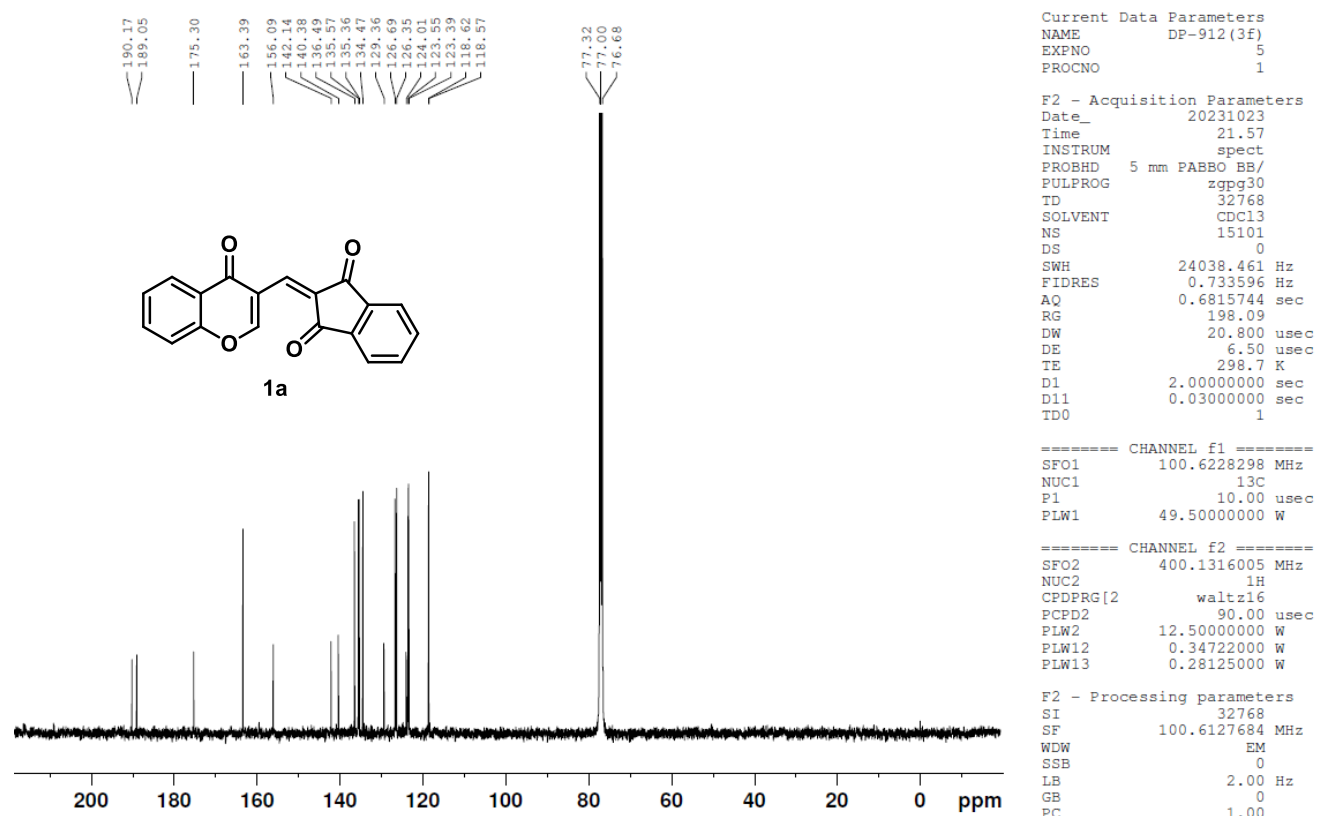



**<sup>1</sup>H NMR spectrum of compound 1b (CDCl<sub>3</sub>, 400 MHz)**

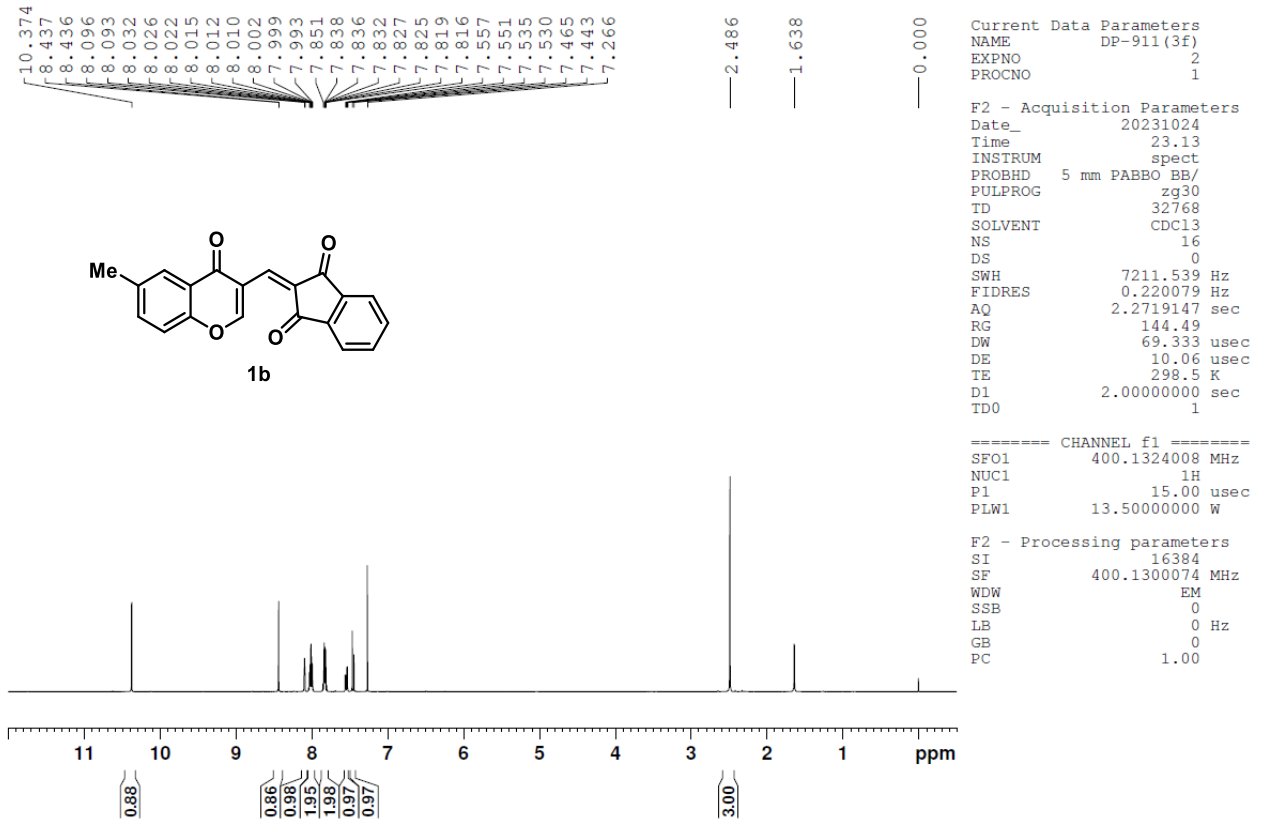

**<sup>13</sup>C NMR spectrum of compound 1b (CDCl<sub>3</sub>, 100 MHz)**

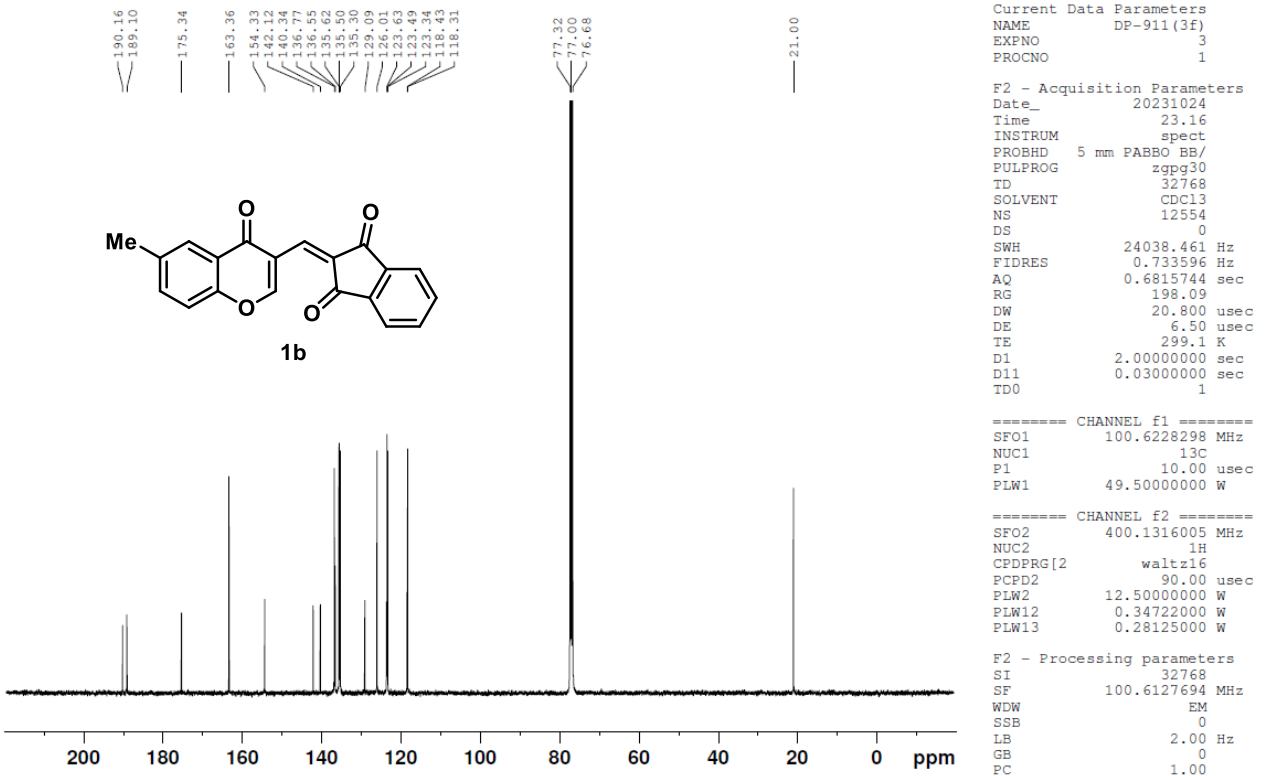

### $^1\text{H}$ NMR spectrum of compound **1c** ( $\text{CDCl}_3$ , 400 MHz)

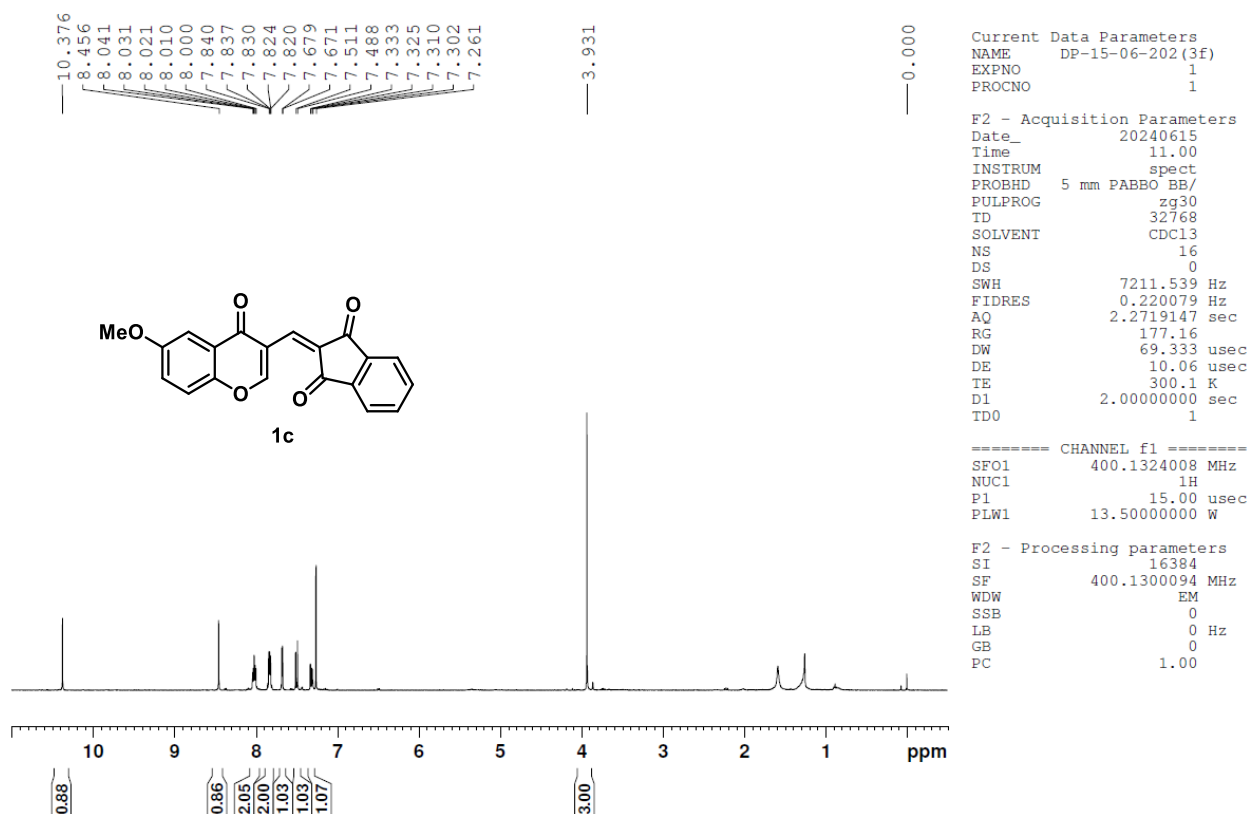

### $^{13}\text{C}$ NMR spectrum of compound **1c** ( $\text{CDCl}_3$ , 100 MHz)

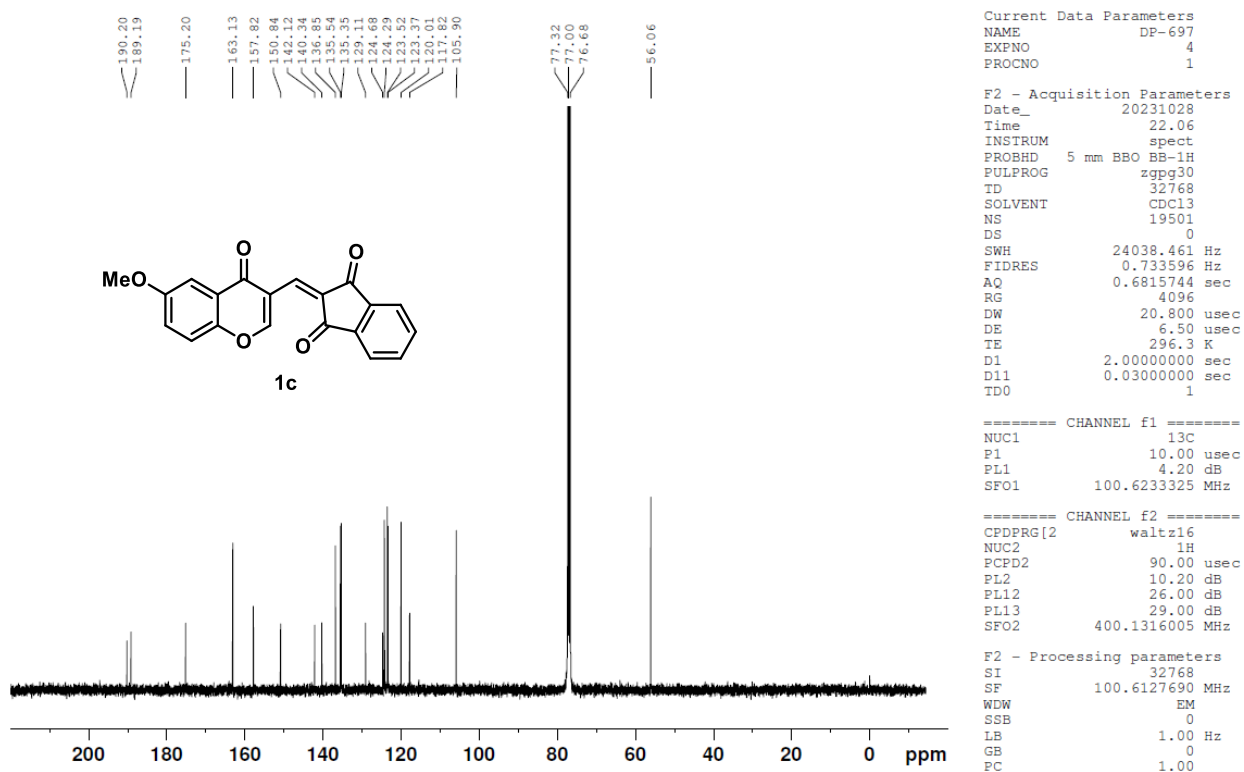

### <sup>1</sup>H NMR spectrum of compound **1d** (CDCl<sub>3</sub>, 400 MHz)

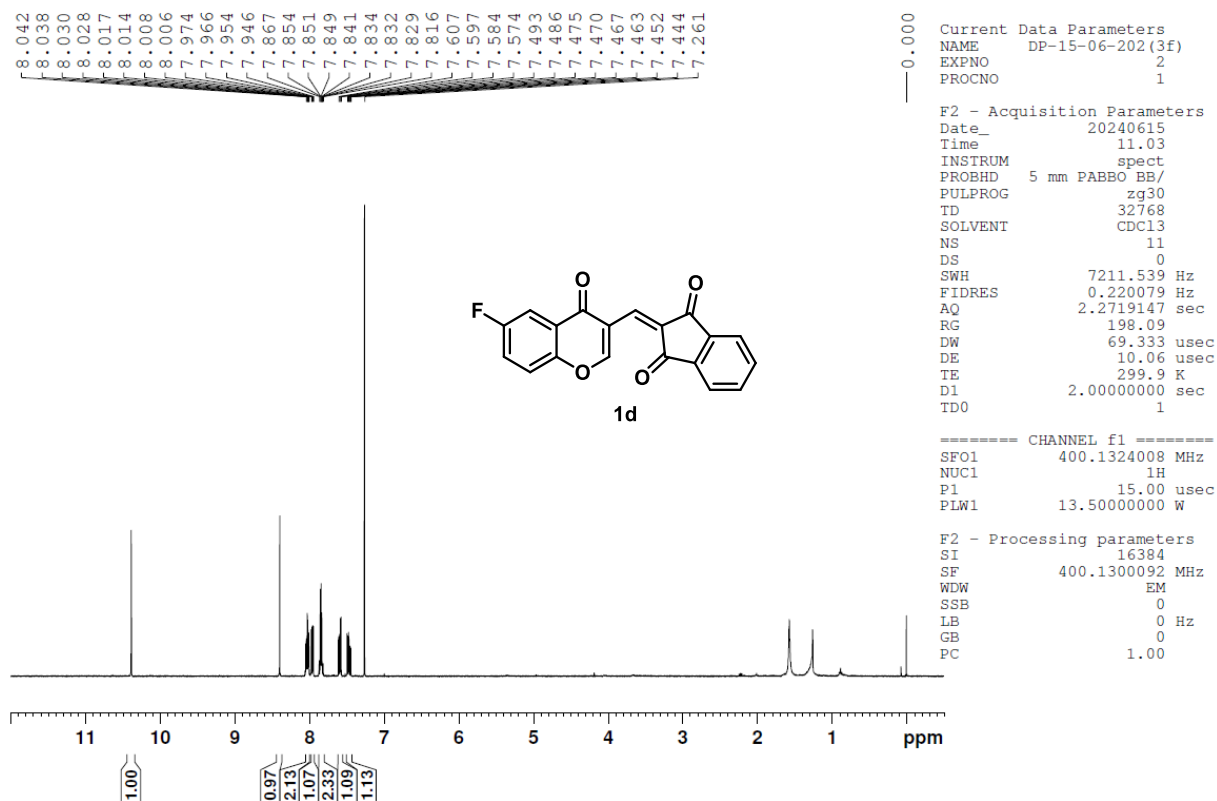

### <sup>13</sup>C NMR spectrum of compound **1d** (CDCl<sub>3</sub>, 100 MHz)

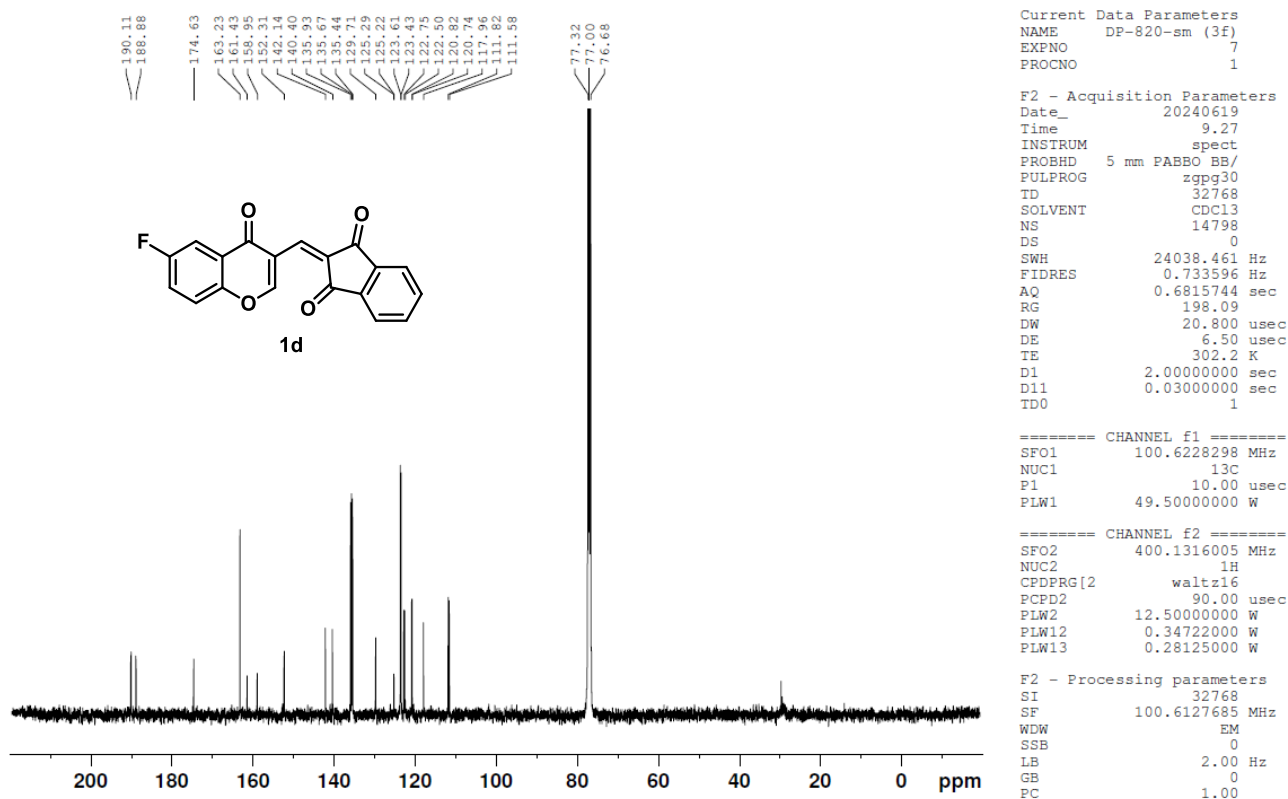

<sup>19</sup>F NMR spectrum of compound 1d (CDCl<sub>3</sub>, 376 MHz)

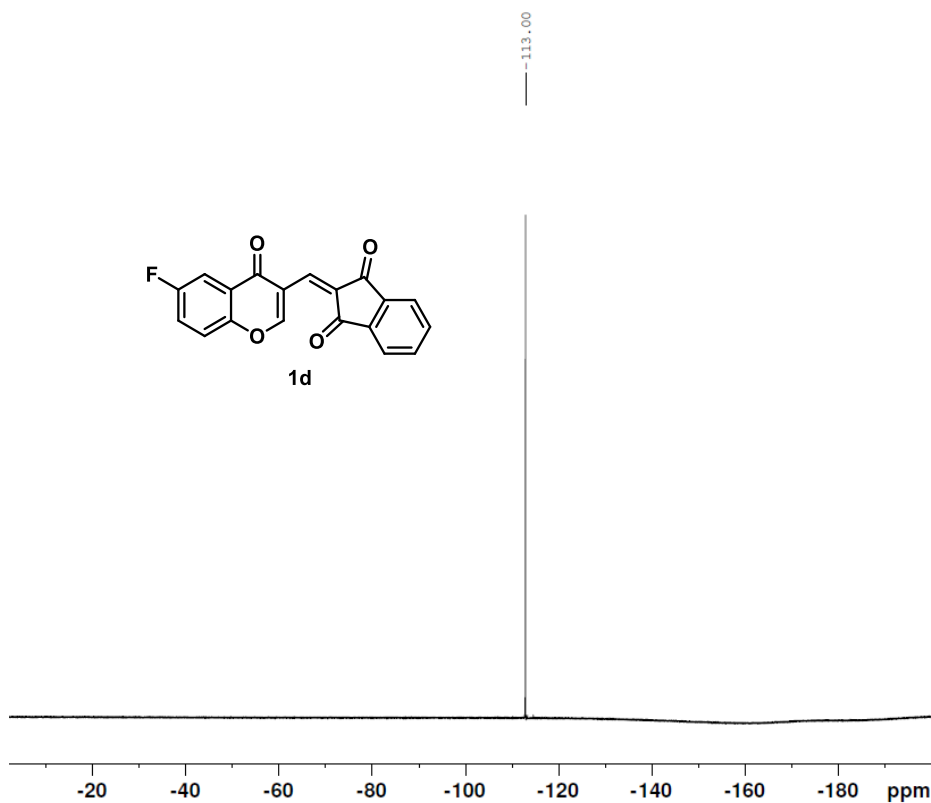

Current Data Parameters  
NAME DP-14-06-2024(3f)  
EXPNO 13  
PROCNO 1

F2 - Acquisition Parameters  
Date\_ 20240614  
Time 18.10  
INSTRUM spect  
PROBHD 5 mm PABBO BB/  
PULPROG zgig  
TD 131072  
SOLVENT CDCl3  
NS 16  
DS 0  
SWH 89285.711 Hz  
FIDRES 0.681196 Hz  
AQ 0.7340032 sec  
RG 198.09  
DW 5.600 usec  
DE 6.50 usec  
TE 298.2 K  
D1 1.00000000 sec  
D11 0.03000000 sec  
TD0 1

===== CHANNEL f1 =====  
SFO1 376.4607168 MHz  
NUC1 19F  
P1 15.00 usec  
PLW1 16.50000000 W

===== CHANNEL f2 =====  
SFO2 400.1316005 MHz  
NUC2 1H  
CPDPRG[2] waltz16  
PCPD2 90.00 usec  
PLW2 12.50000000 W  
PLW12 0.34722000 W

F2 - Processing parameters  
SI 65536  
SF 376.4983662 MHz  
WDW EM  
SSB 0  
LB 1.00 Hz  
GB 0  
PC 1.00

<sup>1</sup>H NMR spectrum of compound 1e (CDCl<sub>3</sub>, 400 MHz)

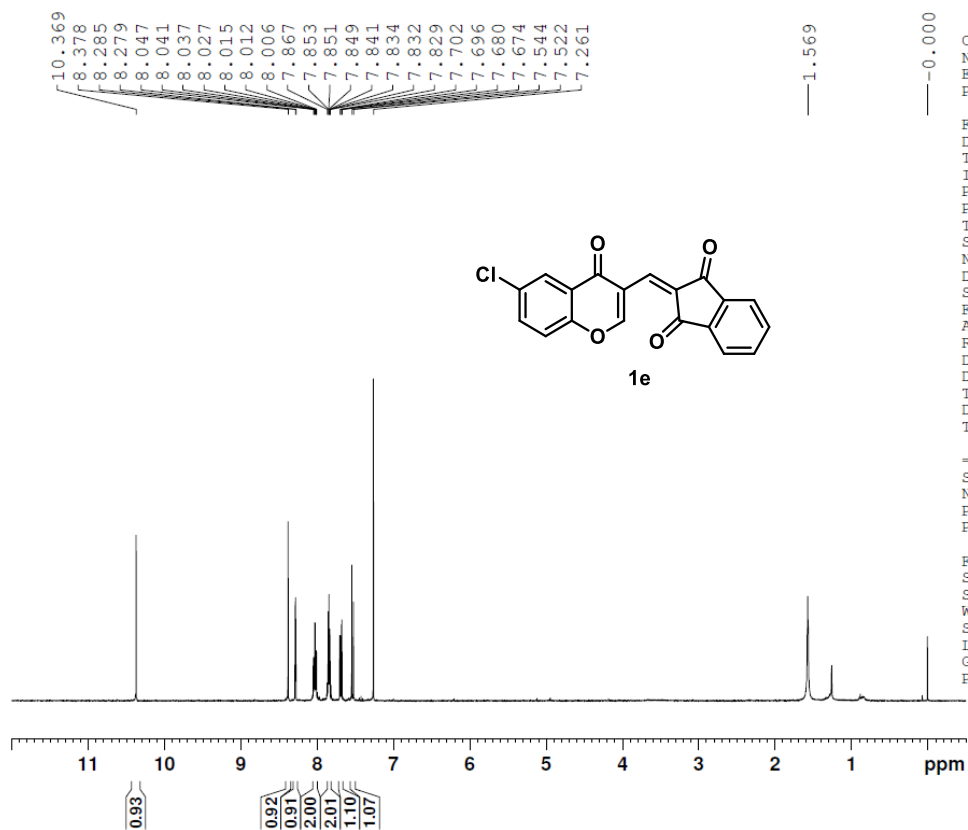

Current Data Parameters  
NAME DP-15-06-202(3f)  
EXPNO 10  
PROCNO 1

F2 - Acquisition Parameters  
Date\_ 20240615  
Time 15.13  
INSTRUM spect  
PROBHD 5 mm PABBO BB/  
PULPROG zg30  
TD 32768  
SOLVENT CDCl3  
NS 16  
DS 0  
SWH 7211.539 Hz  
FIDRES 0.220079 Hz  
AQ 2.2719147 sec  
RG 198.09  
DW 69.333 usec  
DE 10.06 usec  
TE 300.7 K  
D1 2.00000000 sec  
TD0 1

===== CHANNEL f1 =====  
SFO1 400.1324008 MHz  
NUC1 1H  
P1 15.00 usec  
PLW1 13.50000000 W

F2 - Processing parameters  
SI 16384  
SF 400.1300096 MHz  
WDW EM  
SSB 0  
LB 0 Hz  
GB 0  
PC 1.00

<sup>13</sup>C NMR spectrum of compound **1e** (CDCl<sub>3</sub>, 100 MHz)

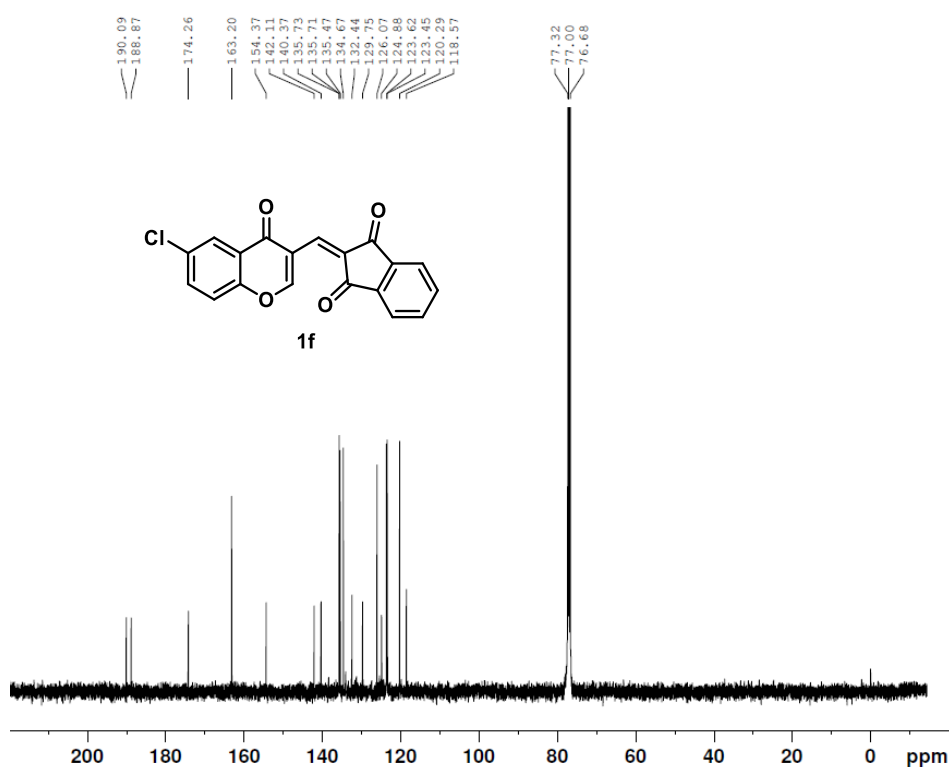

```

Current Data Parameters
NAME      DP-907
EXPNO    2
PROCNO   1

F2 - Acquisition Parameters
Date_    20240312
Time     23.12
INSTRUM  spect
PROBHD   5 mm BBO BB-1H
PULPROG  zgpg30
TD       32768
SOLVENT  CDCl3
NS       16622
DS       0
SWH      24038.461 Hz
FIDRES   0.733596 Hz
AQ       0.6815744 sec
RG       4096
DW       20.800 usec
DE       6.50 usec
TE       295.6 K
D1       2.00000000 sec
D11      0.03000000 sec
TD0      1

===== CHANNEL f1 =====
NUC1     13C
P1       10.00 usec
PL1      4.20 dB
SFO1     100.6233325 MHz

===== CHANNEL f2 =====
CPDPRG2  waltz16
NUC2     1H
PCPD2    90.00 usec
PL2      10.20 dB
PL12     26.00 dB
PL13     29.00 dB
SFO2     400.1316005 MHz

F2 - Processing parameters
SI       32768
SF       100.6127696 MHz
WDW      EM
SSB      0
LB       1.00 Hz
GB       0
PC       1.00
    
```

<sup>1</sup>H NMR spectrum of compound **1f** (CDCl<sub>3</sub>, 400 MHz)

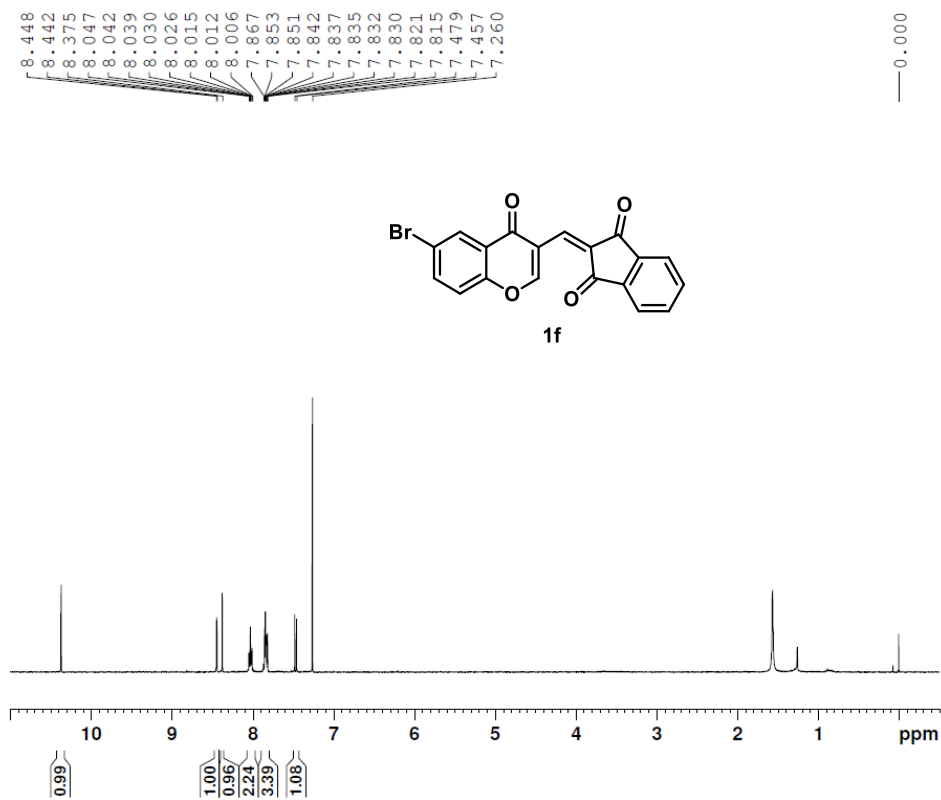

```

Current Data Parameters
NAME      DP-15-06-202 (3F)
EXPNO    9
PROCNO   1

F2 - Acquisition Parameters
Date_    20240615
Time     15.10
INSTRUM  spect
PROBHD   5 mm PABBO BB/
PULPROG  zg30
TD       32768
SOLVENT  CDCl3
NS       11
DS       0
SWH      7211.539 Hz
FIDRES   0.220079 Hz
AQ       2.2719147 sec
RG       198.09
DW       69.333 usec
DE       10.06 usec
TE       300.6 K
D1       2.00000000 sec
TD0      1

===== CHANNEL f1 =====
SFO1     400.1324008 MHz
NUC1     1H
P1       15.00 usec
PLW1     13.50000000 W

F2 - Processing parameters
SI       16384
SF       400.1300099 MHz
WDW      EM
SSB      0
LB       0 Hz
GB       0
PC       1.00
    
```

<sup>13</sup>C NMR spectrum of compound **1f** (CDCl<sub>3</sub>, 100 MHz)

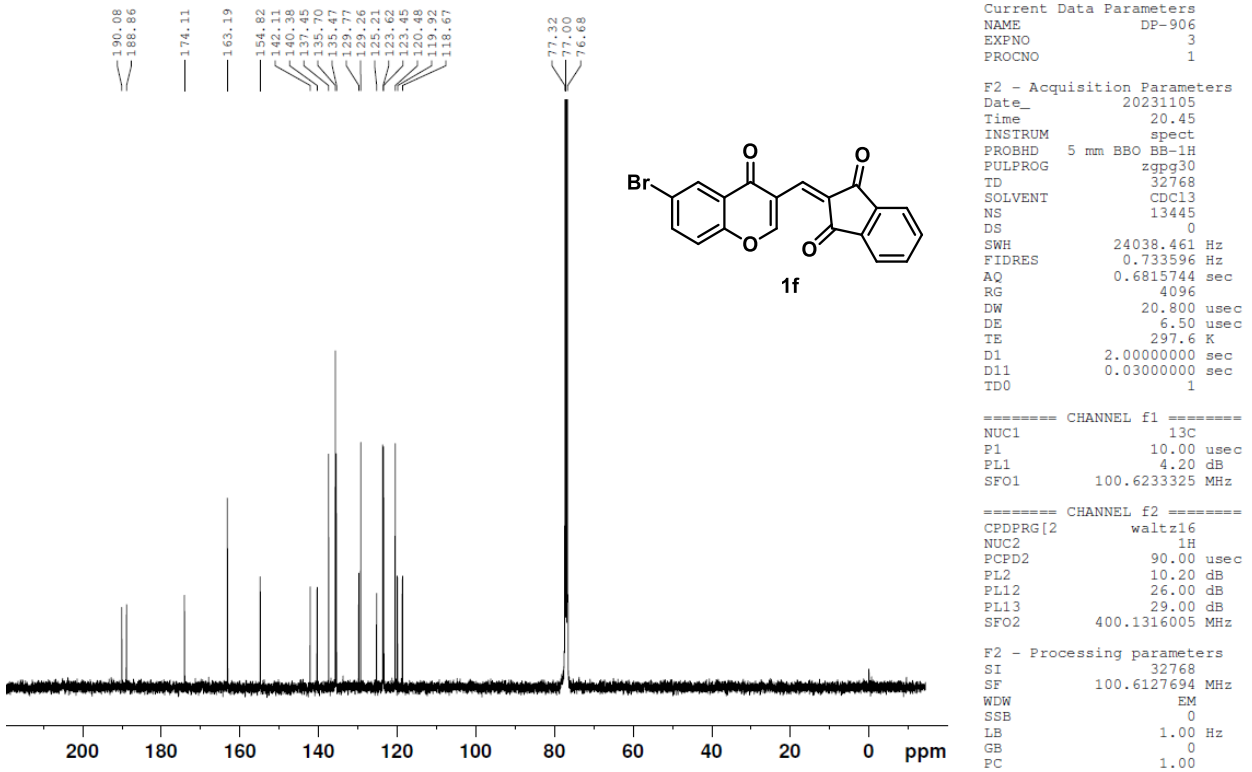

<sup>1</sup>H NMR spectrum of compound **1g** (CDCl<sub>3</sub>, 400 MHz)

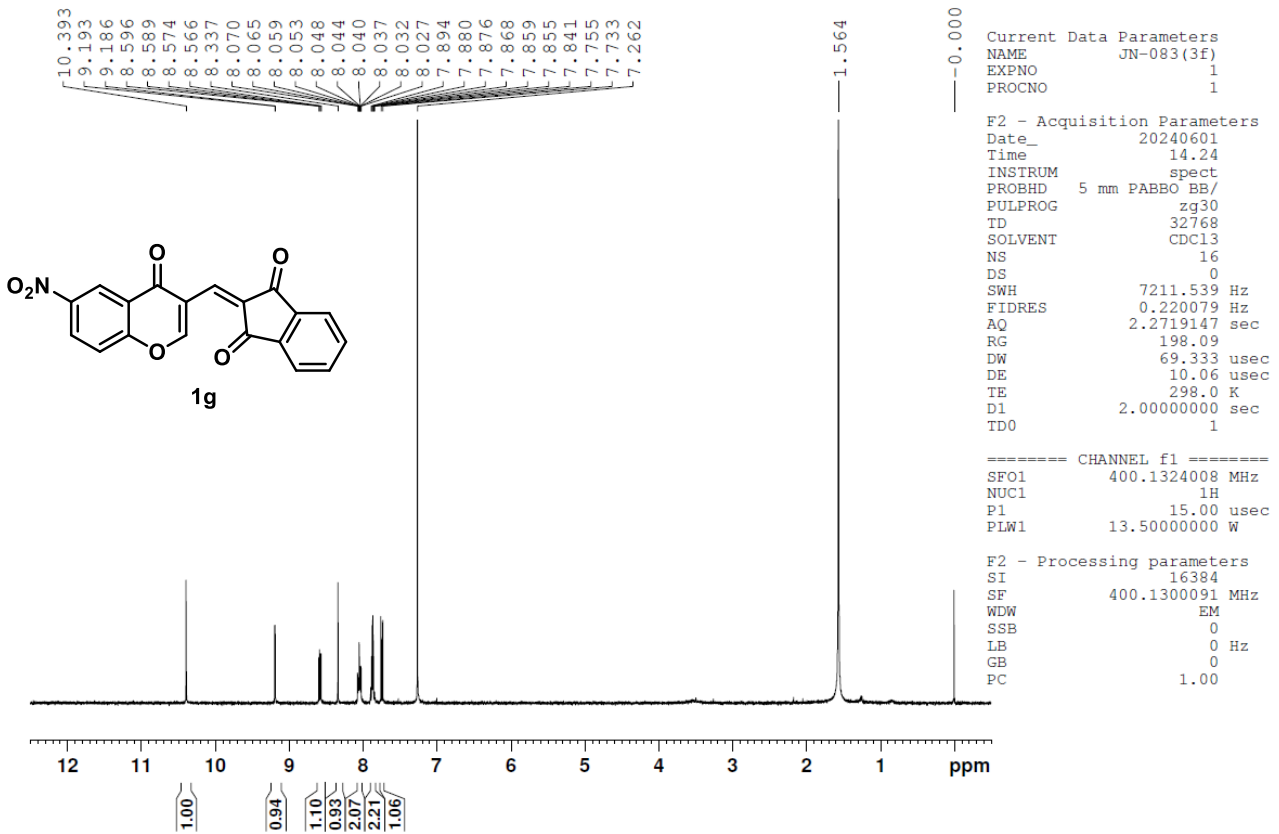

<sup>13</sup>C NMR spectrum of compound **1g** (CDCl<sub>3</sub>, 100 MHz)

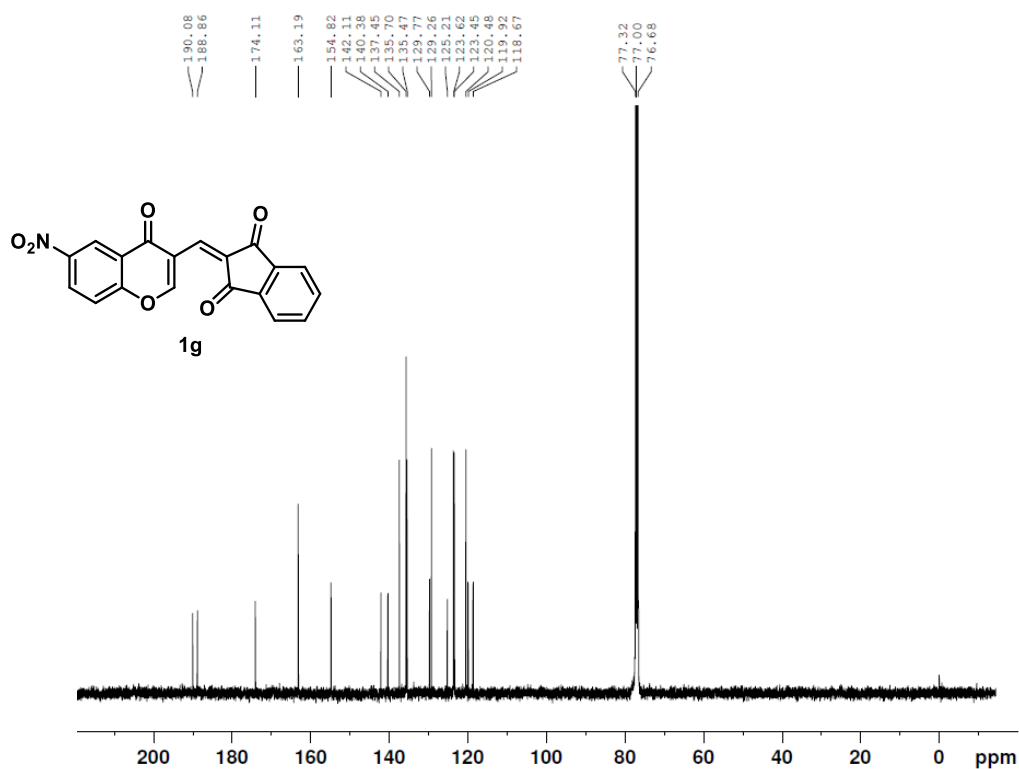

```

Current Data Parameters
NAME          DP-906
EXPNO         3
PROCNO        1

F2 - Acquisition Parameters
Date_         20231105
Time          20.45
INSTRUM       spect
PROBHD        5 mm BBO BB-1H
PULPROG       zgpg30
TD            32768
SOLVENT       CDCl3
NS            13445
DS            0
SWH           24038.461 Hz
FIDRES        0.733596 Hz
AQ            0.6815744 sec
RG            4096
DW            20.800 usec
DE            6.50 usec
TE            297.6 K
D1            2.00000000 sec
D11           0.03000000 sec
TD0           1

===== CHANNEL f1 =====
NUC1           13C
P1            10.00 usec
PL1           4.20 dB
SFO1          100.6233325 MHz

===== CHANNEL f2 =====
CPDPRG[2]     waltz16
NUC2           1H
PCPD2         90.00 usec
PL2           10.20 dB
PL12          26.00 dB
PL13          29.00 dB
SFO2          400.1316005 MHz

F2 - Processing parameters
SI            32768
SF            100.6127694 MHz
WDW           EM
SSB           0
LB            1.00 Hz
GB            0
PC            1.00
    
```

<sup>1</sup>H NMR spectrum of compound **1h** (CDCl<sub>3</sub>, 400 MHz)

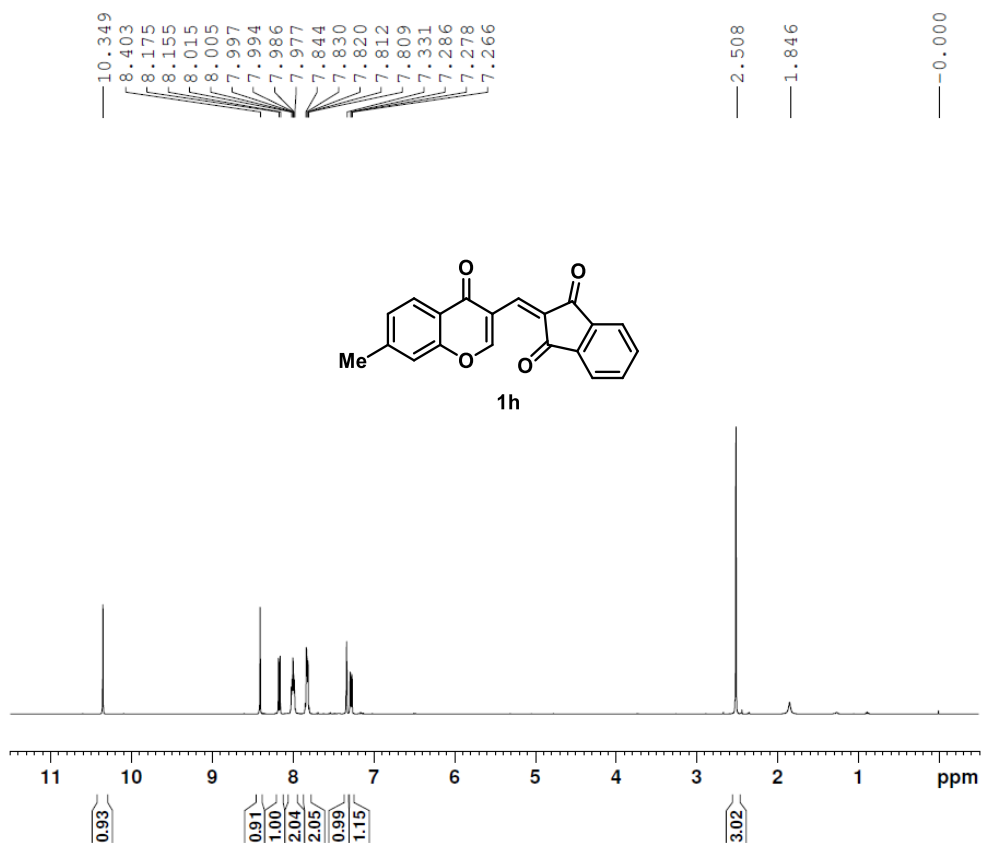

```

Current Data Parameters
NAME          DP-1217
EXPNO         1
PROCNO        1

F2 - Acquisition Parameters
Date_         20240419
Time          22.05
INSTRUM       spect
PROBHD        5 mm BBO BB-1H
PULPROG       zg30
TD            32768
SOLVENT       CDCl3
NS            16
DS            0
SWH           7246.377 Hz
FIDRES        0.221142 Hz
AQ            2.2609921 sec
RG            161.3
DW            69.000 usec
DE            6.50 usec
TE            294.8 K
D1            2.00000000 sec
TD0           1

===== CHANNEL f1 =====
NUC1           1H
P1            15.00 usec
PL1           11.10 dB
SFO1          400.1324008 MHz

F2 - Processing parameters
SI            16384
SF            400.1300021 MHz
WDW           EM
SSB           0
LB            0 Hz
GB            0
PC            1.00
    
```

**<sup>13</sup>C NMR spectrum of compound **1h** (CDCl<sub>3</sub>, 100 MHz)**

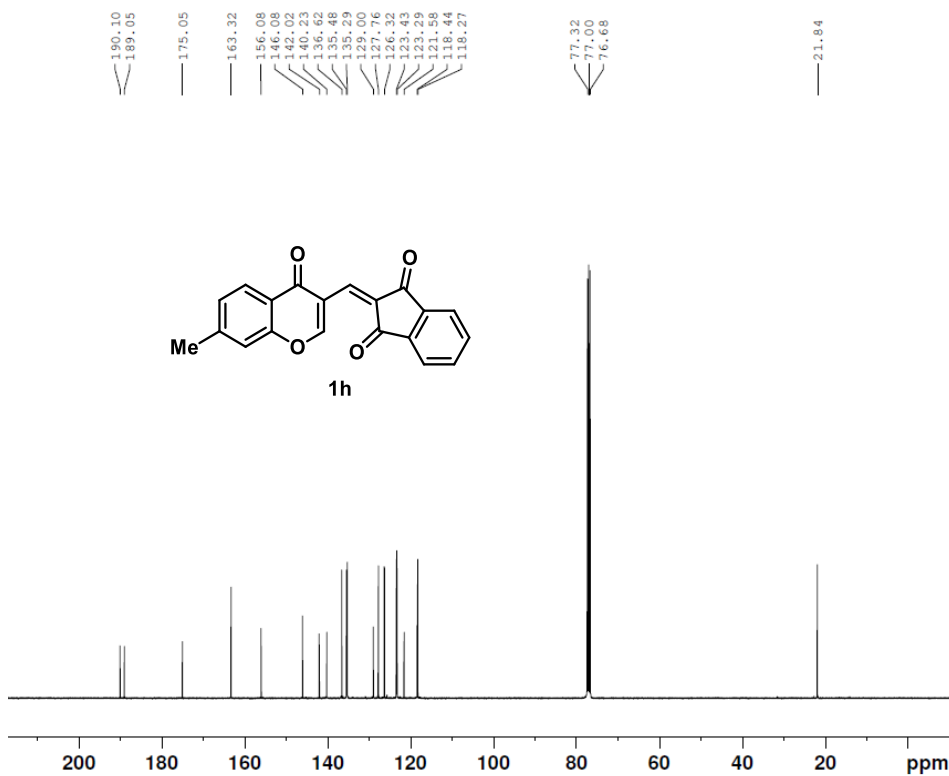

```

Current Data Parameters
NAME          DP-1217
EXPNO         2
PROCNO        1

F2 - Acquisition Parameters
Date_         20240419
Time          22.10
INSTRUM       spect
PROBHD        5 mm BBO BB-1H
PULPROG       zgpg30
TD            32768
SOLVENT       CDCl3
NS            15093
DS            0
SWH           24038.461 Hz
FIDRES        0.733596 Hz
AQ            0.6815744 sec
RG            4096
DW            20.800 usec
DE            6.50 usec
TE            295.3 K
D1            2.00000000 sec
D11           0.03000000 sec
TD0           1

===== CHANNEL f1 =====
NUC1          13C
P1            10.00 usec
PL1           4.20 dB
SFO1          100.6233325 MHz

===== CHANNEL f2 =====
CPDPRG[2]    waltz16
NUC2          1H
PCPD2         90.00 usec
PL2           10.20 dB
PL12          26.00 dB
PL13          29.00 dB
SFO2          400.1316005 MHz

F2 - Processing parameters
SI            32768
SF            100.6127736 MHz
WDW           EM
SSB           0
LB            1.00 Hz
GB            0
PC            1.00
    
```

**<sup>1</sup>H NMR spectrum of compound **1i** (CDCl<sub>3</sub>, 400 MHz)**

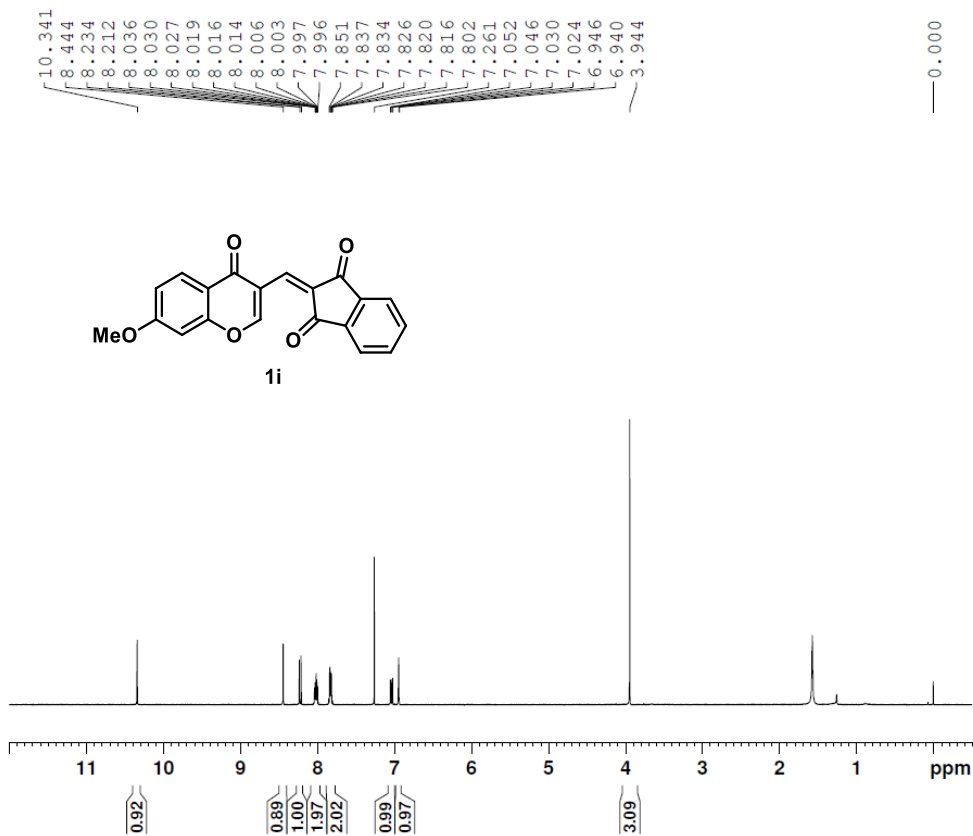

```

Current Data Parameters
NAME          DP-16-06-202(3f)
EXPNO         4
PROCNO        1

F2 - Acquisition Parameters
Date_         20240617
Time          21.43
INSTRUM       spect
PROBHD        5 mm PABBO BB/
PULPROG       zg30
TD            32768
SOLVENT       CDCl3
NS            7
DS            0
SWH           7211.539 Hz
FIDRES        0.220079 Hz
AQ            2.2719147 sec
RG            198.09
DW            69.333 usec
DE            10.06 usec
TE            301.0 K
D1            2.00000000 sec
TD0           1

===== CHANNEL f1 =====
SFO1          400.1324008 MHz
NUC1          1H
P1            15.00 usec
PLW1          13.50000000 W

F2 - Processing parameters
SI            16384
SF            400.1300096 MHz
WDW           EM
SSB           0
LB            0 Hz
GB            0
PC            1.00
    
```



<sup>13</sup>C NMR spectrum of compound 1i (CDCl<sub>3</sub>, 100 MHz)

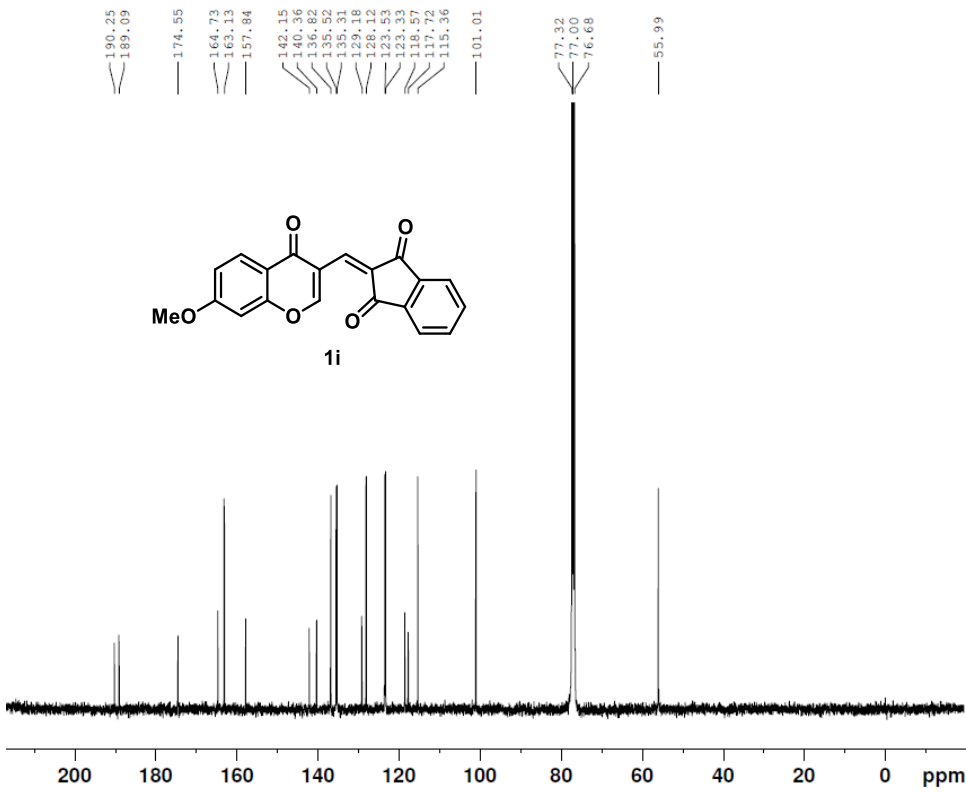

<sup>1</sup>H NMR spectrum of compound 1j (CDCl<sub>3</sub>, 400 MHz)

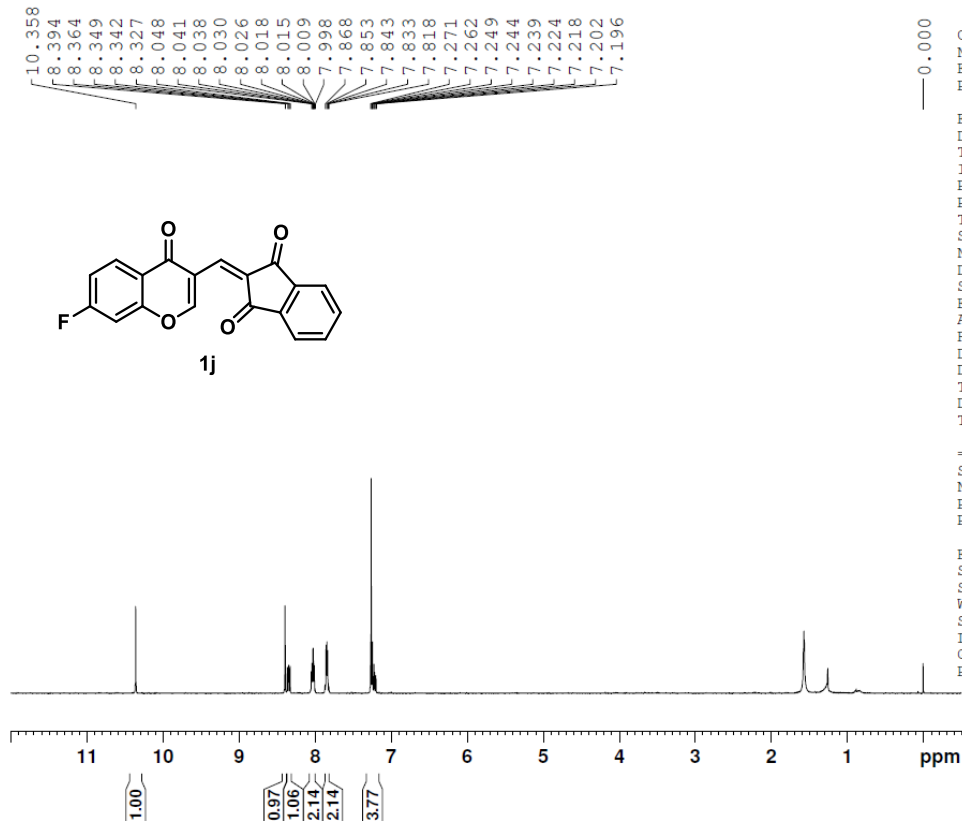

<sup>13</sup>C NMR spectrum of compound **1j** (CDCl<sub>3</sub>, 100 MHz)

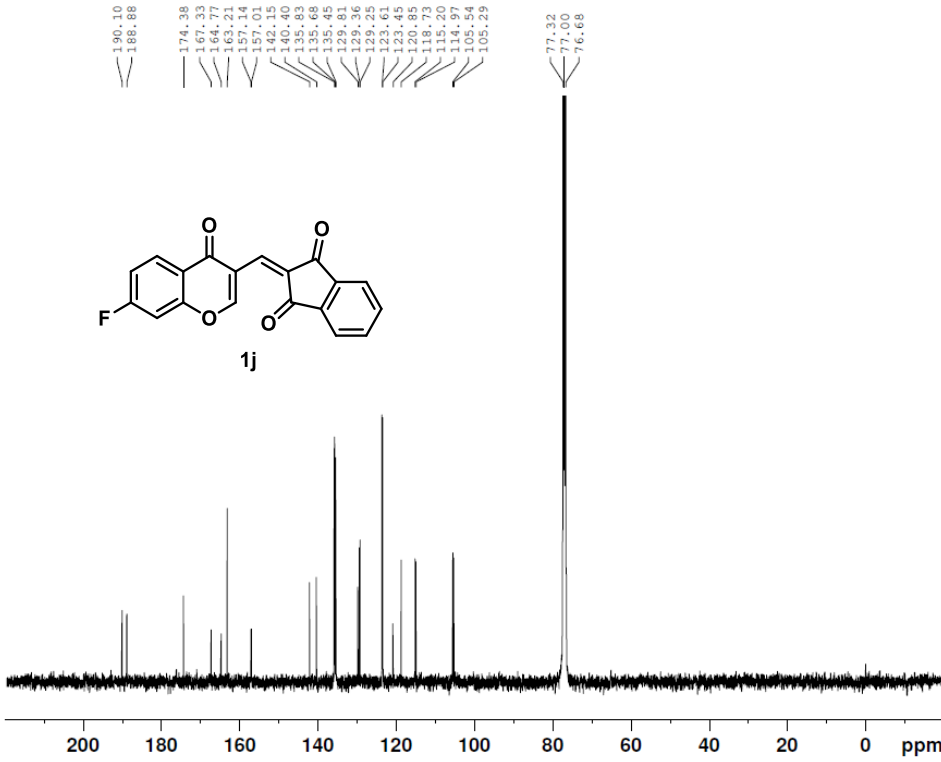

Current Data Parameters  
NAME DP-1037(3f)  
EXPNO 4  
PROCNO 1

F2 - Acquisition Parameters  
Date\_ 20240512  
Time 20.42  
INSTRUM spect  
PROBHD 5 mm PABBO BB/  
PULPROG zgpg30  
TD 32768  
SOLVENT CDCl3  
NS 16063  
DS 0  
SWH 24038.461 Hz  
FIDRES 0.733596 Hz  
AQ 0.6815744 sec  
RG 198.09  
DW 20.800 usec  
DE 6.50 usec  
TE 300.9 K  
D1 2.00000000 sec  
D11 0.03000000 sec  
TD0 1

==== CHANNEL f1 =====  
SFO1 100.6228298 MHz  
NUC1 13C  
P1 10.00 usec  
PLW1 49.50000000 W

==== CHANNEL f2 =====  
SFO2 400.1316005 MHz  
NUC2 1H  
CPDPRG[2] waltz16  
PCPD2 90.00 usec  
PLW2 12.50000000 W  
PLW12 0.34722000 W  
PLW13 0.28125000 W

F2 - Processing parameters  
SI 32768  
SF 100.6127679 MHz  
WDW EM  
SSB 0  
LB 2.00 Hz  
GB 0  
PC 1.00

<sup>19</sup>F NMR spectrum of compound **1j** (CDCl<sub>3</sub>, 376 MHz)

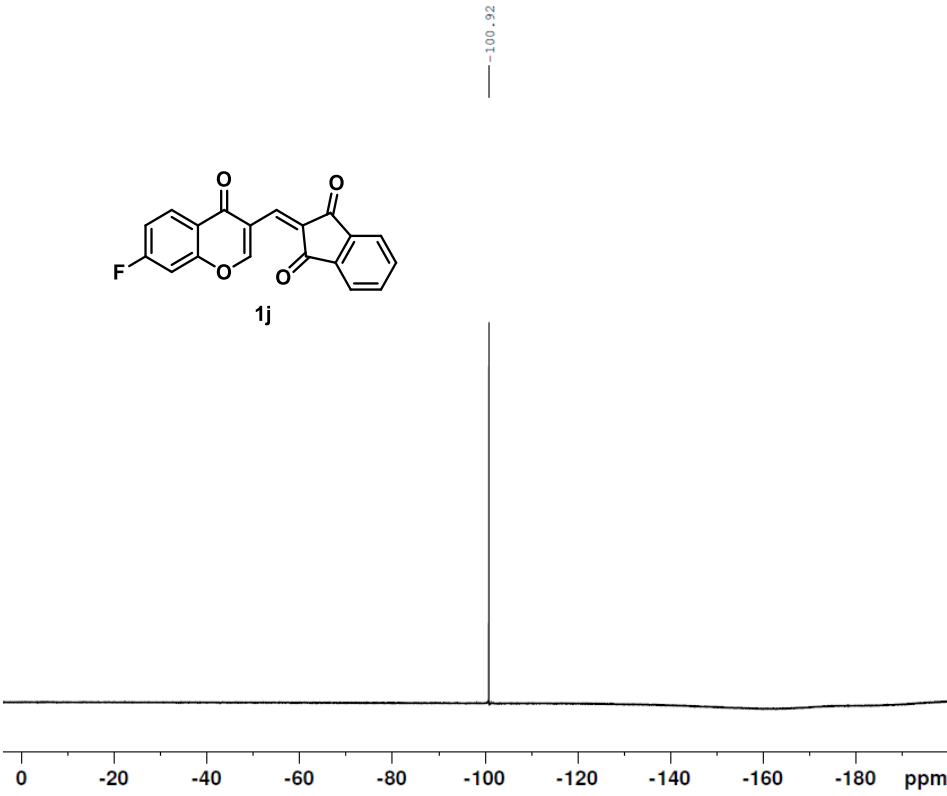

Current Data Parameters  
NAME DP-14-06-2024 (3f)  
EXPNO 12  
PROCNO 1

F2 - Acquisition Parameters  
Date\_ 20240614  
Time 18.04  
INSTRUM spect  
PROBHD 5 mm PABBO BB/  
PULPROG zg1g  
TD 131072  
SOLVENT CDCl3  
NS 16  
DS 0  
SWH 89285.711 Hz  
FIDRES 0.681196 Hz  
AQ 0.7340032 sec  
RG 198.09  
DW 5.600 usec  
DE 6.50 usec  
TE 298.3 K  
D1 1.00000000 sec  
D11 0.03000000 sec  
TD0 1

==== CHANNEL f1 =====  
SFO1 376.4607168 MHz  
NUC1 19F  
P1 15.00 usec  
PLW1 16.50000000 W

==== CHANNEL f2 =====  
SFO2 400.1316005 MHz  
NUC2 1H  
CPDPRG[2] waltz16  
PCPD2 90.00 usec  
PLW2 12.50000000 W  
PLW12 0.34722000 W

F2 - Processing parameters  
SI 65536  
SF 376.4983662 MHz  
WDW EM  
SSB 0  
LB 1.00 Hz  
GB 0  
PC 1.00

### <sup>1</sup>H NMR spectrum of compound **1k** (CDCl<sub>3</sub>, 400 MHz)

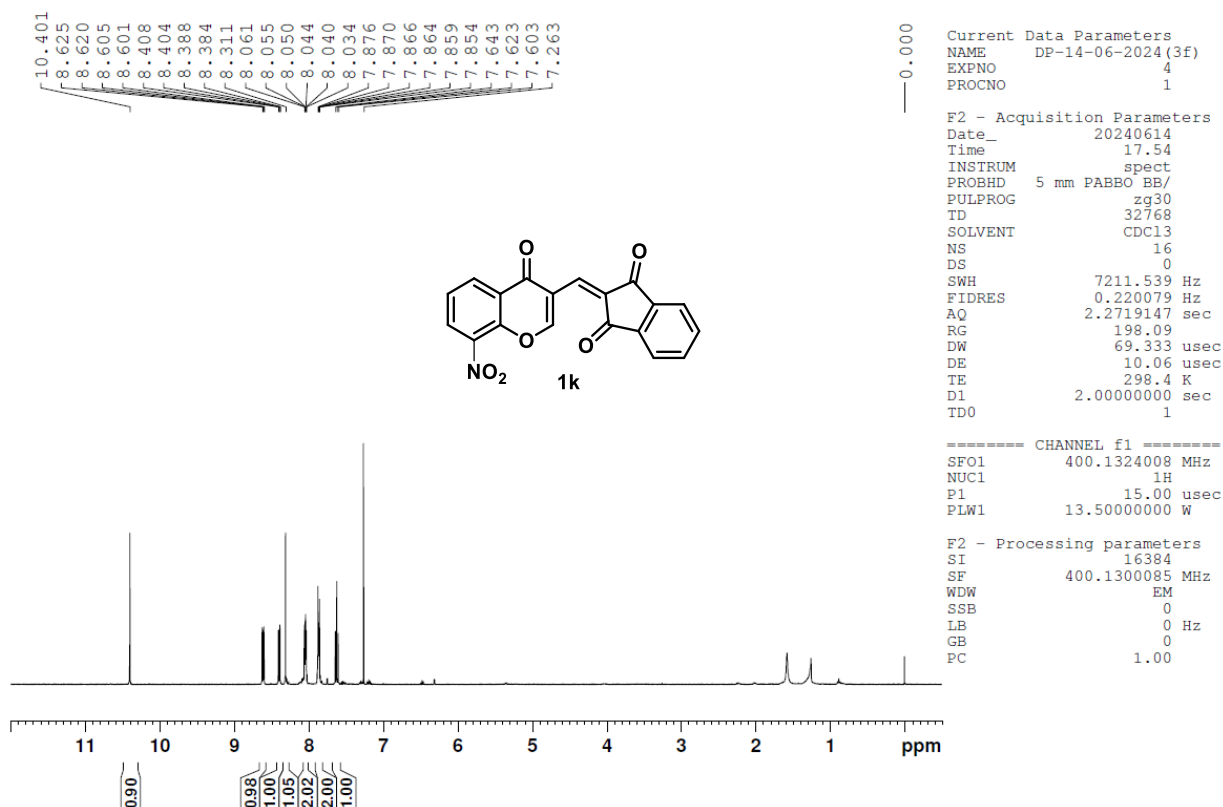

### <sup>13</sup>C NMR spectrum of compound **1k** (CDCl<sub>3</sub>, 100 MHz)

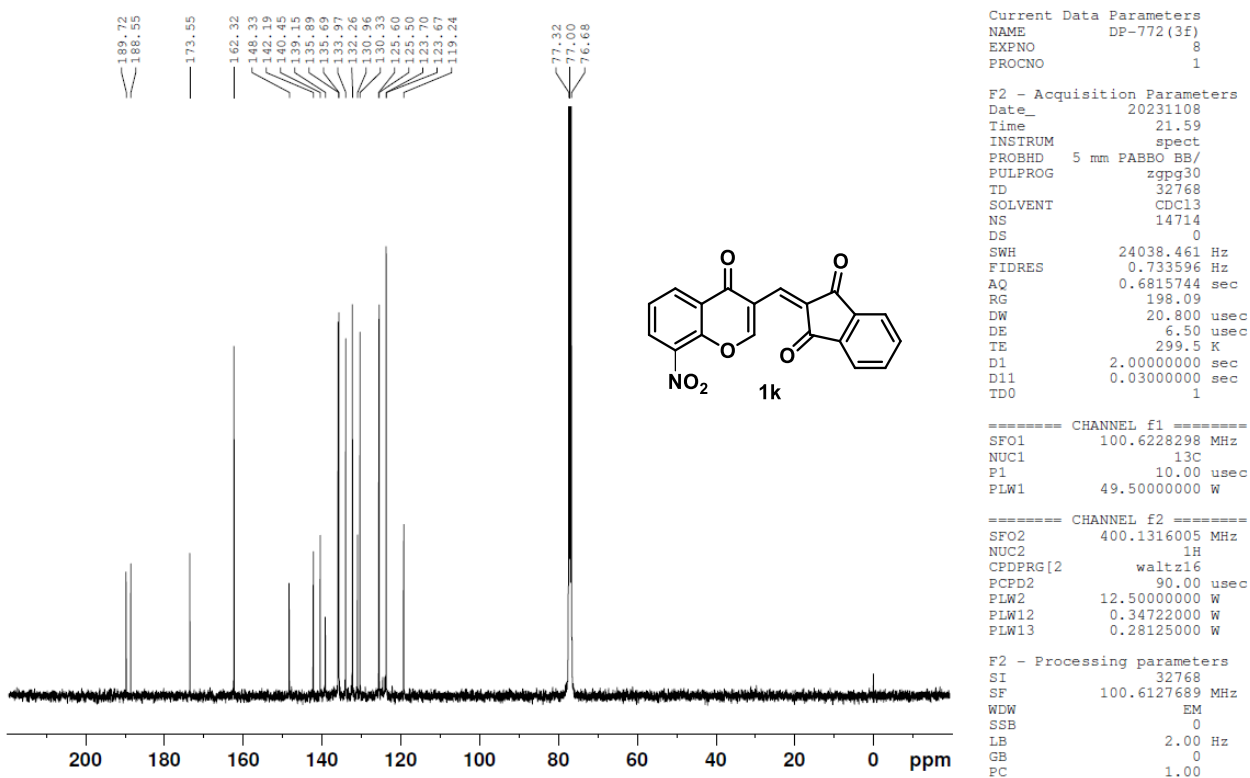

<sup>1</sup>H NMR spectrum of compound 11 (CDCl<sub>3</sub>, 400 MHz)

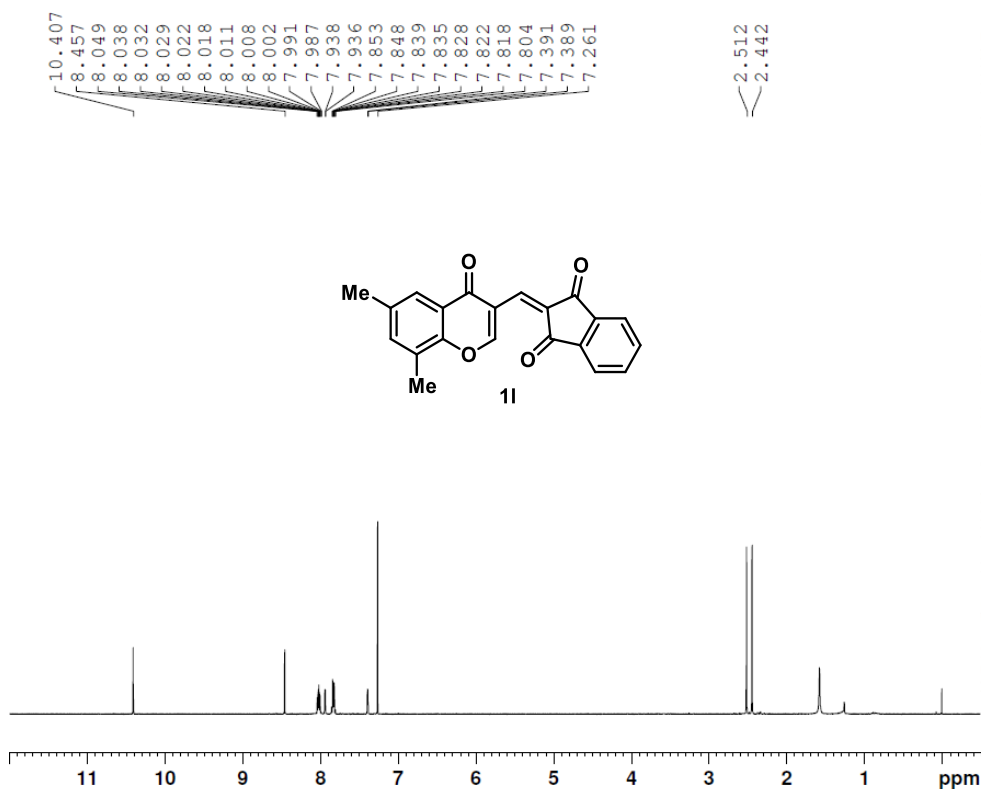

Current Data Parameters  
 NAME DP-15-06-202(3f)  
 EXPNO 6  
 PROCNO 1

F2 - Acquisition Parameters  
 Date\_ 20240615  
 Time 11.52  
 INSTRUM spect  
 PROBHD 5 mm PABBO BB/  
 PULPROG zg30  
 TD 32768  
 SOLVENT CDCl3  
 NS 9  
 DS 0  
 SWH 7211.539 Hz  
 FIDRES 0.220079 Hz  
 AQ 2.2719147 sec  
 RG 198.09  
 DW 69.333 usec  
 DE 10.06 usec  
 TE 298.6 K  
 D1 2.00000000 sec  
 TD0 1

===== CHANNEL f1 =====  
 SFO1 400.1324008 MHz  
 NUC1 1H  
 P1 15.00 usec  
 PLW1 13.50000000 W

F2 - Processing parameters  
 SI 16384  
 SF 400.1300092 MHz  
 WDW EM  
 SSB 0  
 LB 0 Hz  
 GB 0  
 PC 1.00

<sup>13</sup>C NMR spectrum of compound 11 (CDCl<sub>3</sub>, 100 MHz)

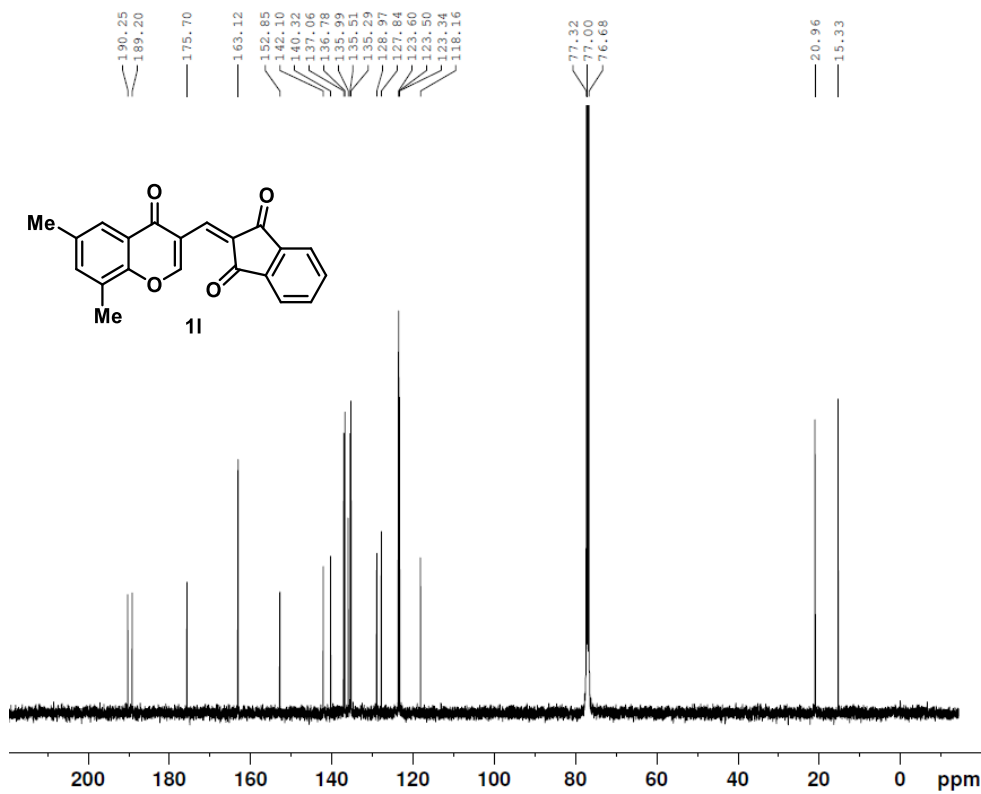

Current Data Parameters  
 NAME DP-1209  
 EXPNO 2  
 PROCNO 1

F2 - Acquisition Parameters  
 Date\_ 20240414  
 Time 22.10  
 INSTRUM spect  
 PROBHD 5 mm BBO BB-1H  
 PULPROG zgpg30  
 TD 32768  
 SOLVENT CDCl3  
 NS 15124  
 DS 0  
 SWH 24038.461 Hz  
 FIDRES 0.733596 Hz  
 AQ 0.6815744 sec  
 RG 4096  
 DW 20.800 usec  
 DE 6.50 usec  
 TE 295.6 K  
 D1 2.00000000 sec  
 D11 0.03000000 sec  
 TD0 1

===== CHANNEL f1 =====  
 NUC1 13C  
 P1 10.00 usec  
 PL1 4.20 dB  
 SFO1 100.6233325 MHz

===== CHANNEL f2 =====  
 CPDPRG2 waltz16  
 NUC2 1H  
 PCPD2 90.00 usec  
 PL2 10.20 dB  
 PL12 26.00 dB  
 PL13 29.00 dB  
 SFO2 400.1316005 MHz

F2 - Processing parameters  
 SI 32768  
 SF 100.6127695 MHz  
 WDW EM  
 SSB 0  
 LB 1.00 Hz  
 GB 0  
 PC 1.00

<sup>1</sup>H NMR spectrum of compound **1m** (CDCl<sub>3</sub>, 400 MHz)

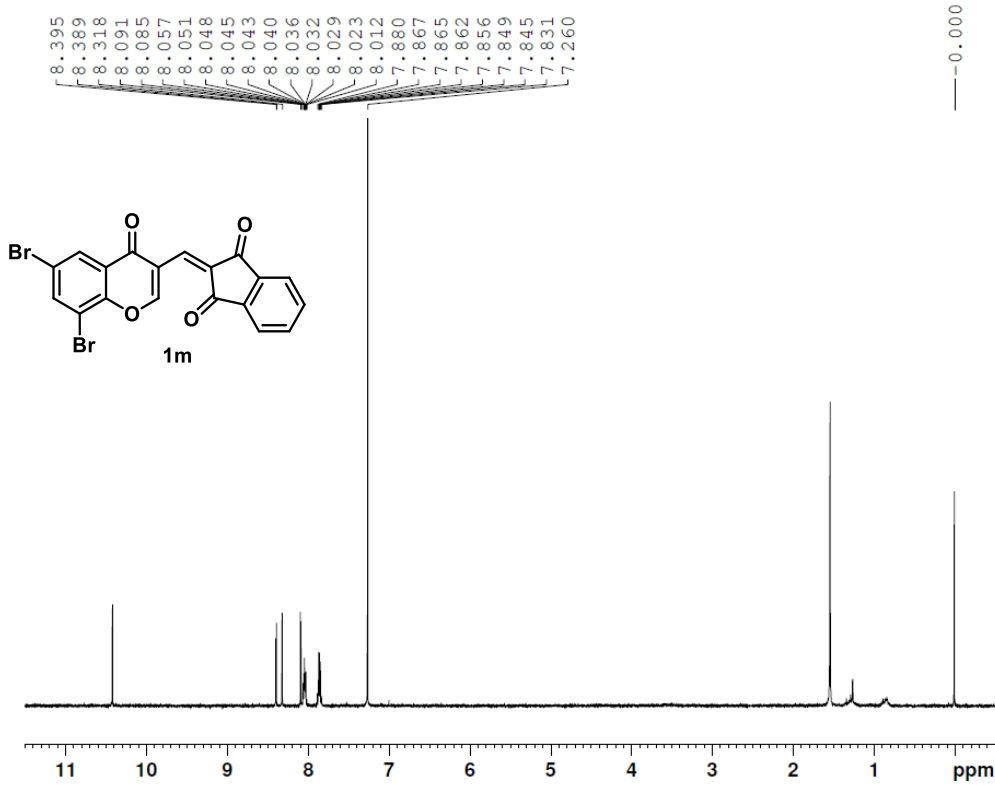

Current Data Parameters  
NAME JN-060 (3f)  
EXPNO 1  
PROCNO 1

F2 - Acquisition Parameters  
Date\_ 20240514  
Time 20.51  
INSTRUM spect  
PROBHD 5 mm PABBO BB/  
PULPROG zg30  
TD 32768  
SOLVENT CDCl3  
NS 9  
DS 0  
SWH 7211.539 Hz  
FIDRES 0.220079 Hz  
AQ 2.2719147 sec  
RG 198.09  
DW 69.333 usec  
DE 10.06 usec  
TE 299.9 K  
D1 2.00000000 sec  
TD0 1

==== CHANNEL f1 =====  
SFO1 400.1324008 MHz  
NUC1 1H  
P1 15.00 usec  
PLW1 13.50000000 W

F2 - Processing parameters  
SI 16384  
SF 400.1300097 MHz  
WDW EM  
SSB 0  
LB 0 Hz  
GB 0  
PC 1.00

<sup>13</sup>C NMR spectrum of compound **1m** (CDCl<sub>3</sub>, 100 MHz)

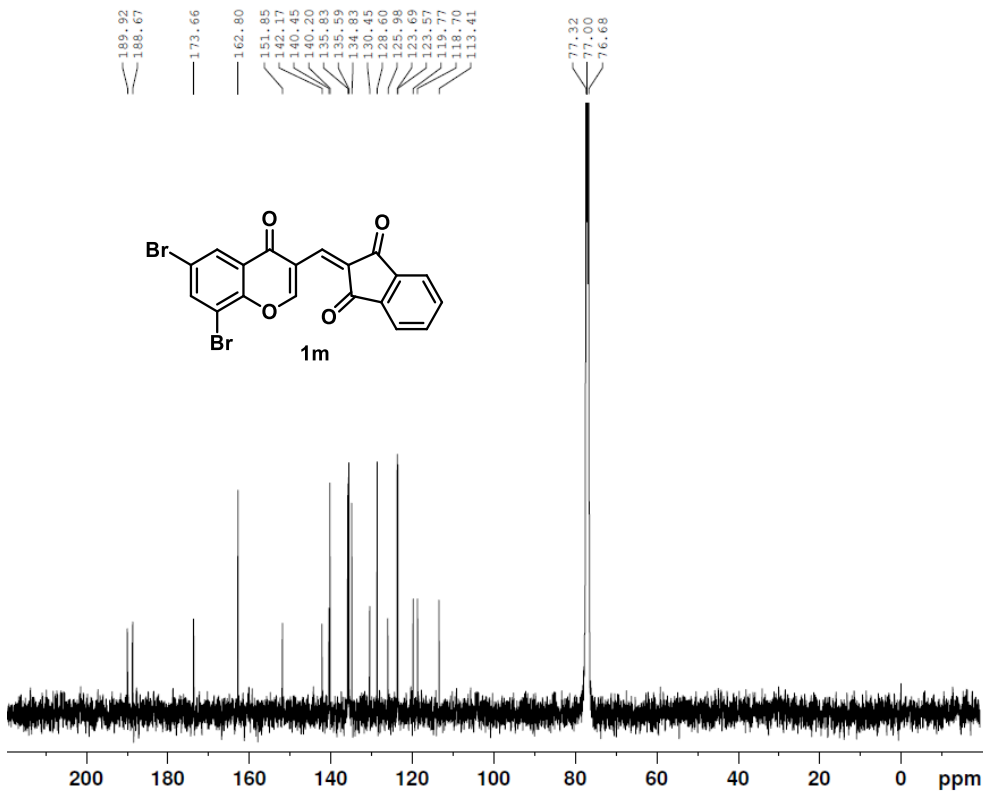

Current Data Parameters  
NAME JN-060 (3f)  
EXPNO 3  
PROCNO 1

F2 - Acquisition Parameters  
Date\_ 20240519  
Time 20.40  
INSTRUM spect  
PROBHD 5 mm PABBO BB/  
PULPROG zgpg30  
TD 32768  
SOLVENT CDCl3  
NS 17543  
DS 0  
SWH 24038.461 Hz  
FIDRES 0.733596 Hz  
AQ 0.6815744 sec  
RG 198.09  
DW 20.800 usec  
DE 6.50 usec  
TE 298.1 K  
D1 2.00000000 sec  
D11 0.03000000 sec  
TD0 1

==== CHANNEL f1 =====  
SFO1 100.6228298 MHz  
NUC1 13C  
P1 10.00 usec  
PLW1 49.50000000 W

==== CHANNEL f2 =====  
SFO2 400.1316005 MHz  
NUC2 1H  
CPDPRG[2] waltz16  
PCPD2 90.00 usec  
PLW2 12.50000000 W  
PLW12 0.34722000 W  
PLW13 0.28125000 W

F2 - Processing parameters  
SI 32768  
SF 100.6127682 MHz  
WDW EM  
SSB 0  
LB 2.00 Hz  
GB 0  
PC 1.00

<sup>1</sup>H NMR spectrum of compound **1n** (CDCl<sub>3</sub>, 400 MHz)

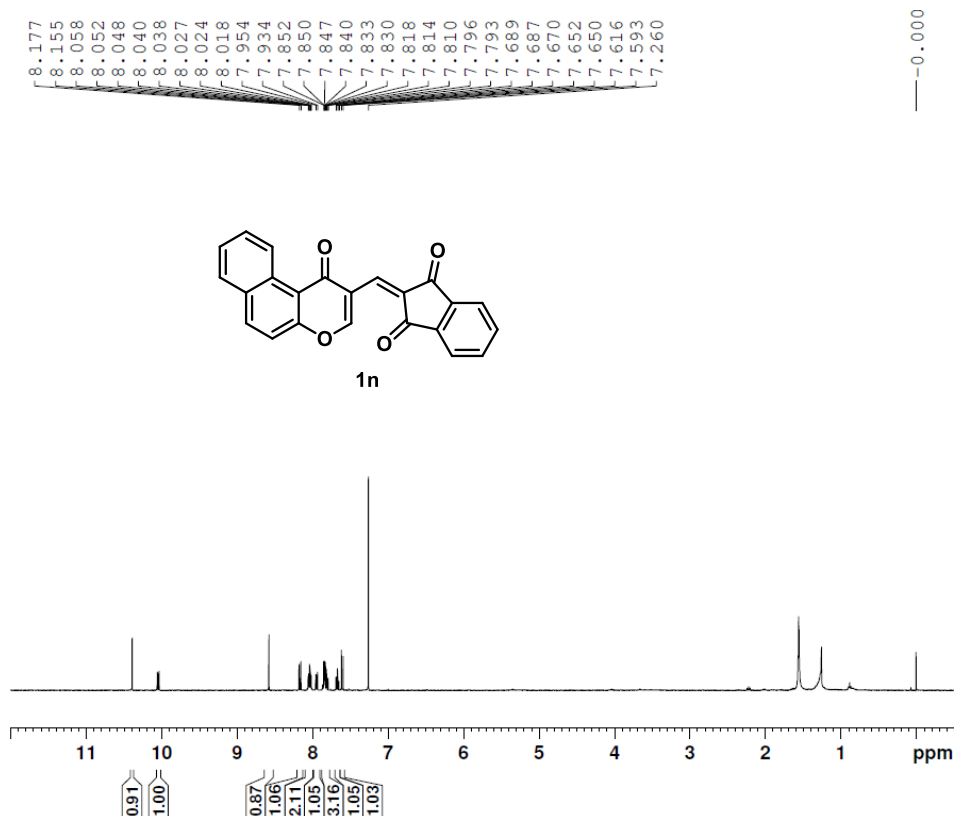

Current Data Parameters  
NAME DP-15-06-202 (3f)  
EXPNO 12  
PROCNO 1

F2 - Acquisition Parameters  
Date\_ 20240615  
Time 15.42  
INSTRUM spect  
PROBHD 5 mm PABBO BB/  
PULPROG zg30  
TD 32768  
SOLVENT CDCl3  
NS 16  
DS 0  
SWH 7211.539 Hz  
FIDRES 0.220079 Hz  
AQ 2.2719147 sec  
RG 198.09  
DW 69.333 usec  
DE 10.06 usec  
TE 301.2 K  
D1 2.00000000 sec  
TD0 1

==== CHANNEL f1 =====  
SFO1 400.1324008 MHz  
NUC1 1H  
P1 15.00 usec  
PLW1 13.50000000 W

F2 - Processing parameters  
SI 16384  
SF 400.1300000 MHz  
WDW EM  
SSB 0  
LB 0 Hz  
GB 0  
PC 1.00

<sup>13</sup>C NMR spectrum of compound **1n** (CDCl<sub>3</sub>, 100 MHz)

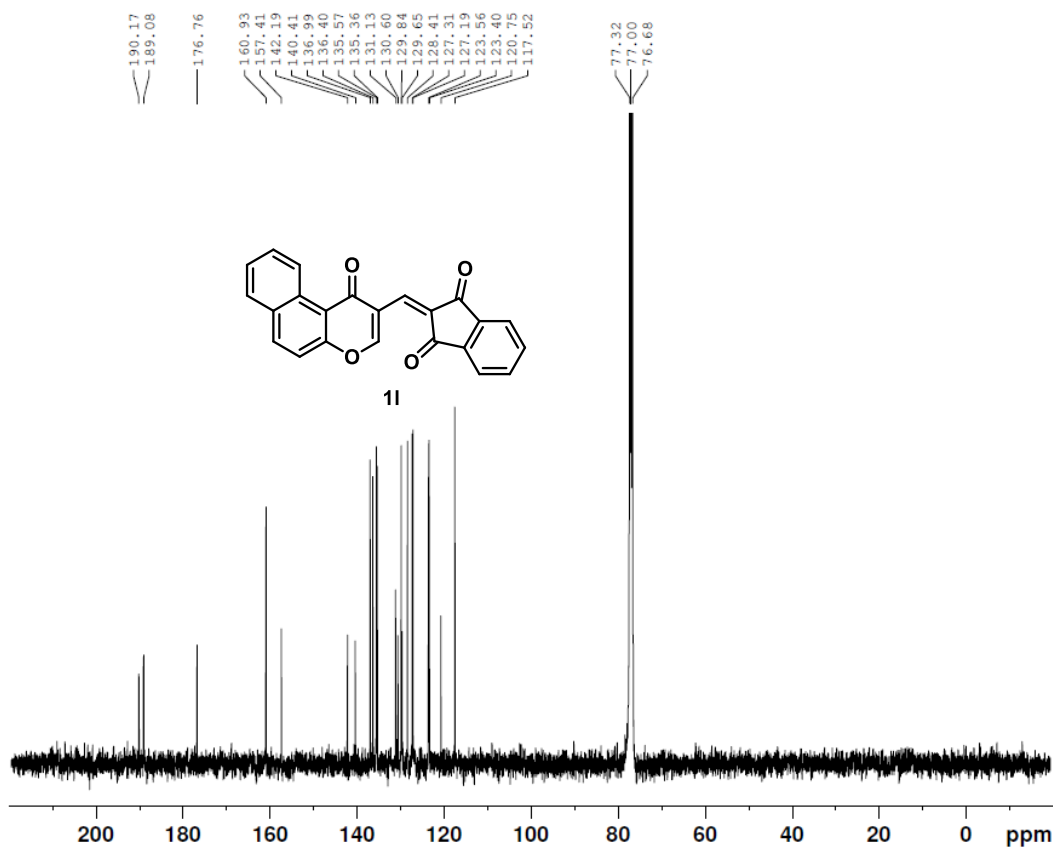

Current Data Parameters  
NAME JN-060 (3f)  
EXPNO 5  
PROCNO 1

F2 - Acquisition Parameters  
Date\_ 20240626  
Time 7.58  
INSTRUM spect  
PROBHD 5 mm PABBO BB/  
PULPROG zgpg30  
TD 32768  
SOLVENT CDCl3  
NS 11620  
DS 0  
SWH 24038.461 Hz  
FIDRES 0.733596 Hz  
AQ 0.6815744 sec  
RG 198.09  
DW 20.800 usec  
DE 6.50 usec  
TE 300.1 K  
D1 2.00000000 sec  
D11 0.03000000 sec  
TD0 1

==== CHANNEL f1 =====  
SFO1 100.6228298 MHz  
NUC1 13C  
P1 10.00 usec  
PLW1 49.50000000 W

==== CHANNEL f2 =====  
SFO2 400.1316005 MHz  
NUC2 1H  
CPDPRG[2] waltz16  
PCPD2 90.00 usec  
PLW2 12.50000000 W  
PLW12 0.34722000 W  
PLW13 0.28125000 W

F2 - Processing parameters  
SI 32768  
SF 100.6127685 MHz  
WDW EM  
SSB 0  
LB 2.00 Hz  
GB 0  
PC 1.00

### <sup>1</sup>H NMR spectrum of compound **1o** (CDCl<sub>3</sub>, 400 MHz)

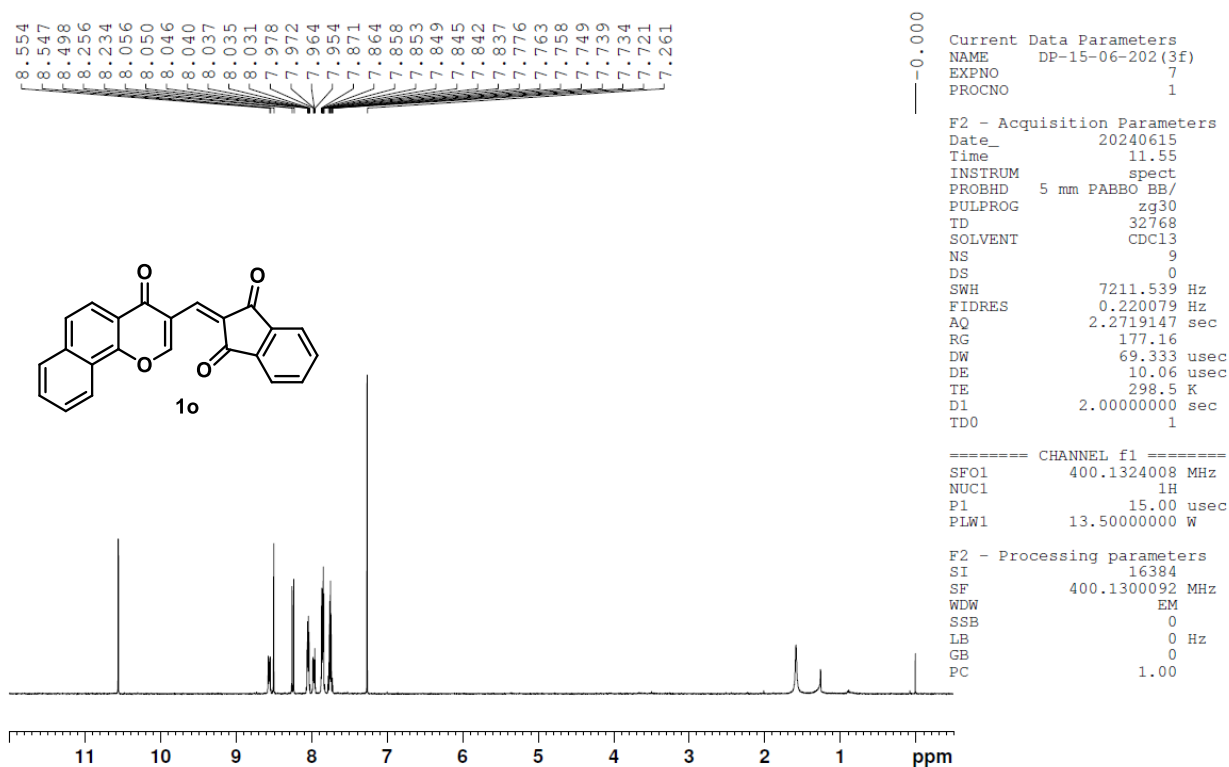

### <sup>13</sup>C NMR spectrum of compound **1o** (CDCl<sub>3</sub>, 100 MHz)

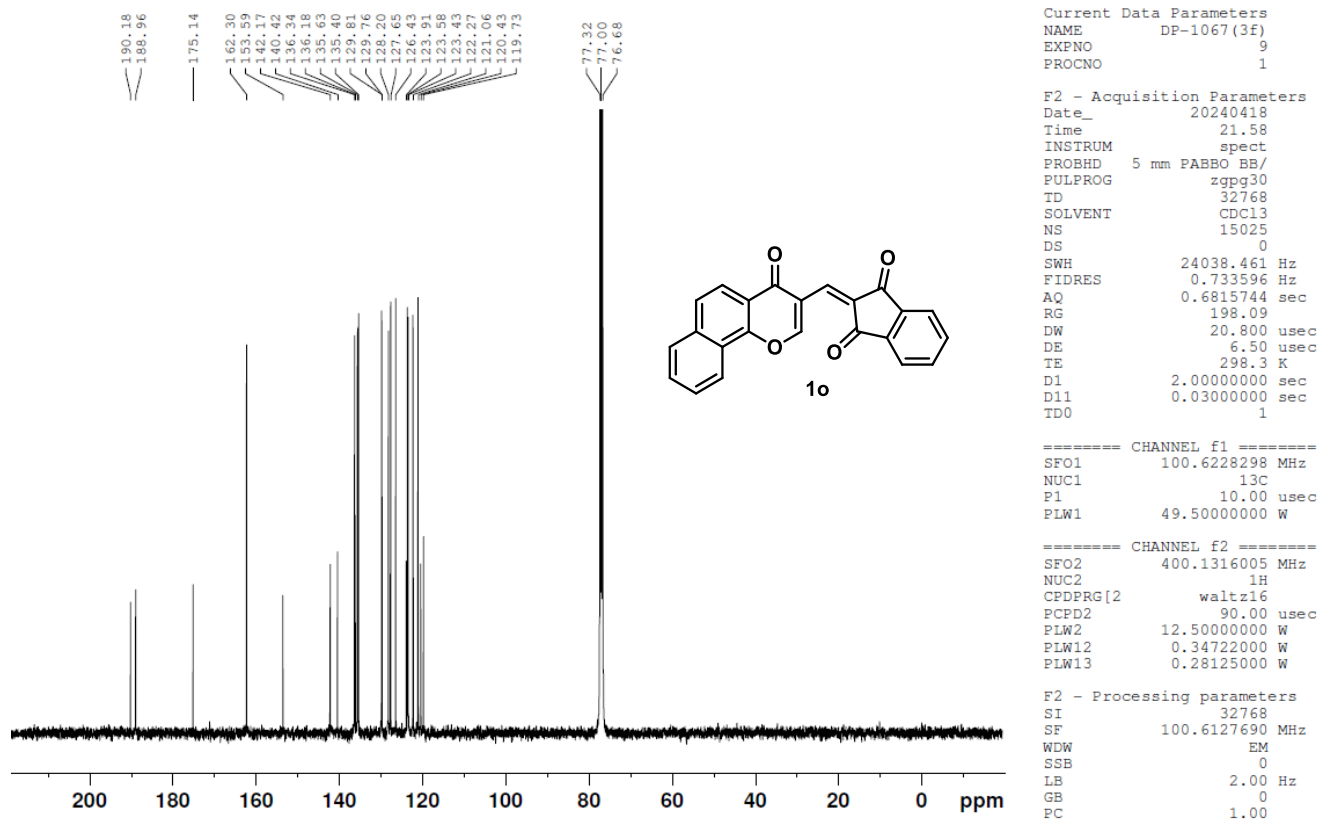

### <sup>1</sup>H NMR spectrum of compound **1p** (CDCl<sub>3</sub>, 400 MHz)

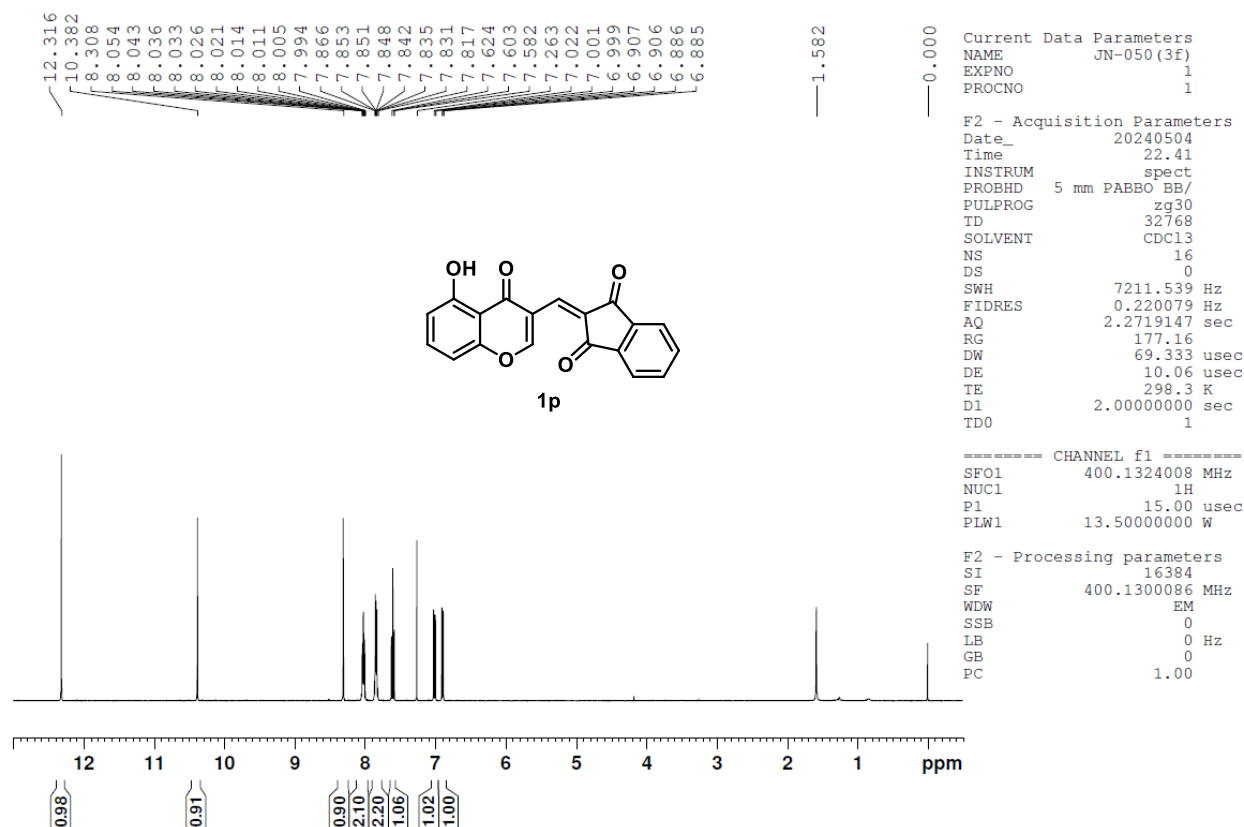

### <sup>13</sup>C NMR spectrum of compound **1p** (CDCl<sub>3</sub>, 100 MHz)

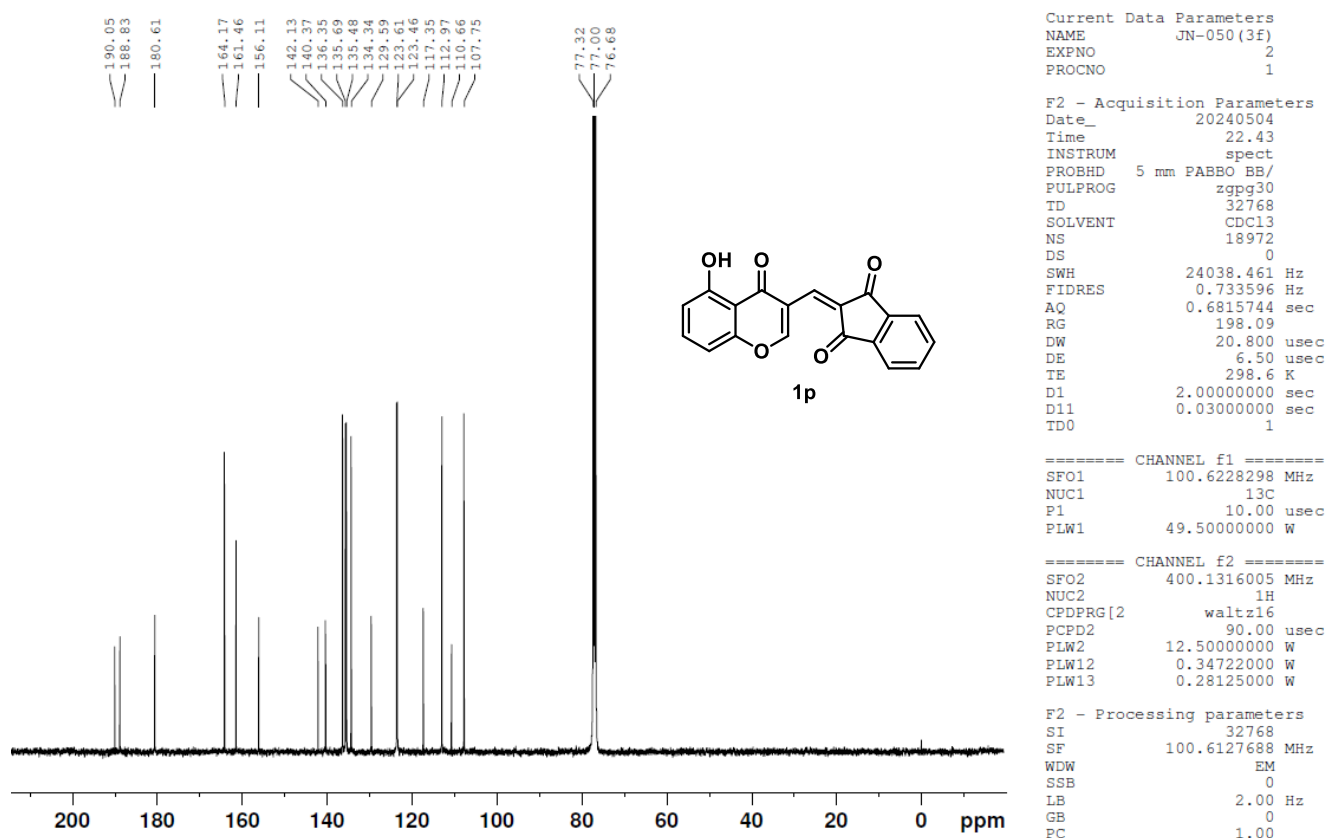



### <sup>1</sup>H NMR spectrum of compound **1q** (CDCl<sub>3</sub>, 400 MHz)

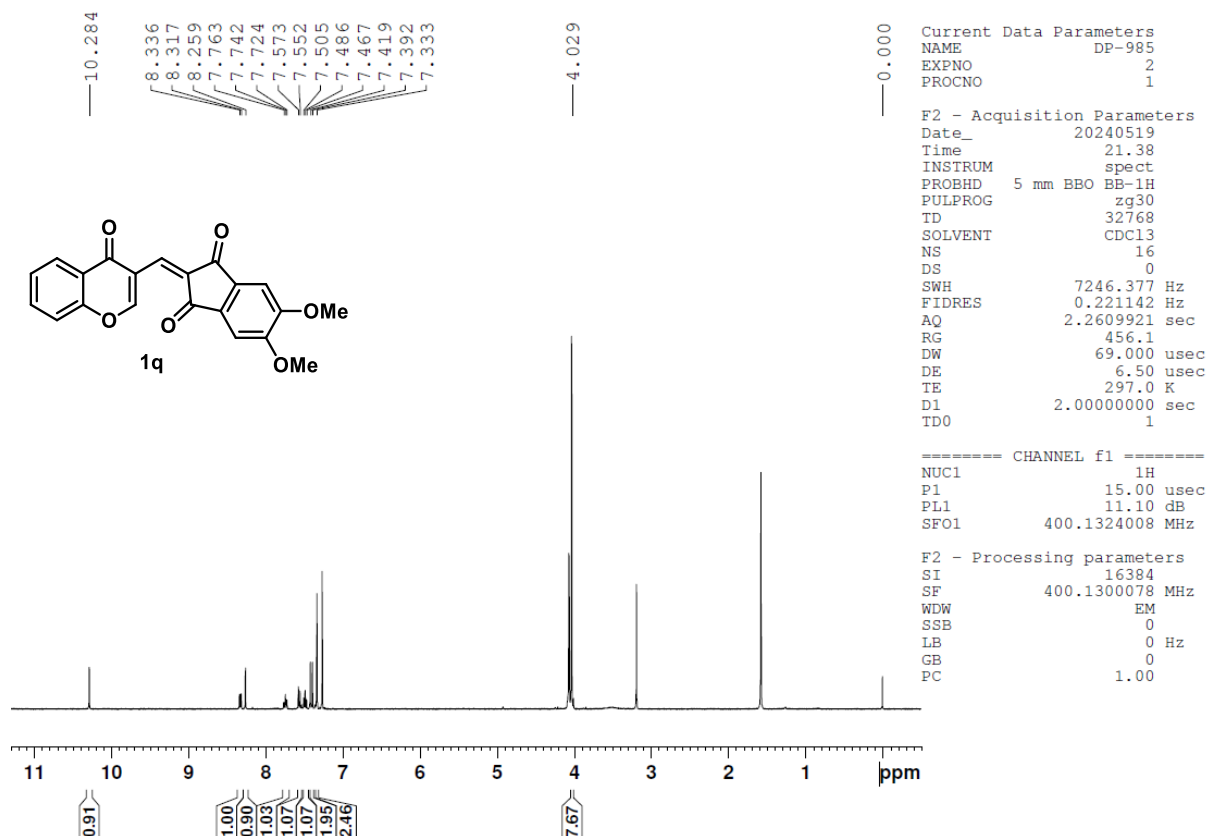

### <sup>13</sup>C NMR spectrum of compound **1q** (CDCl<sub>3</sub>, 100 MHz)

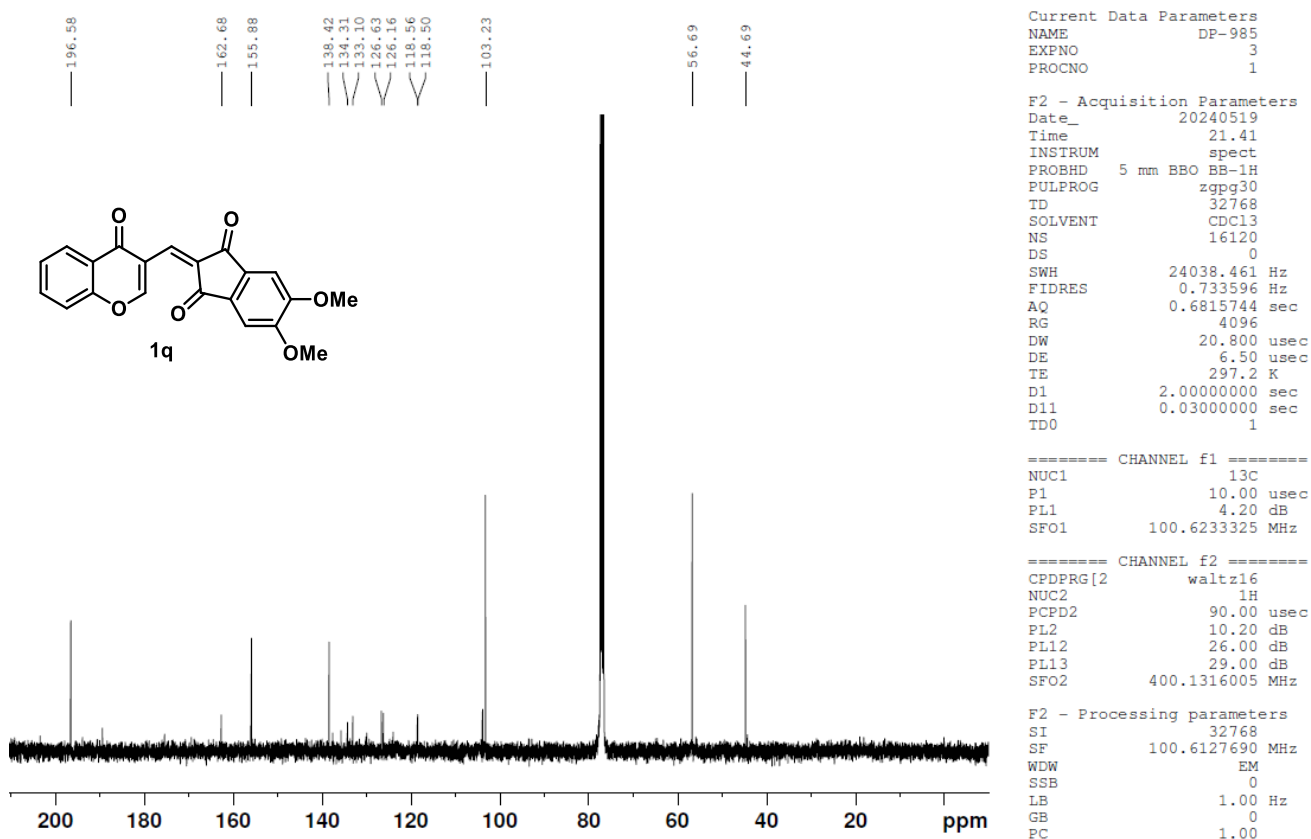

<sup>1</sup>H NMR spectrum of compound 1r (CDCl<sub>3</sub>, 400 MHz)

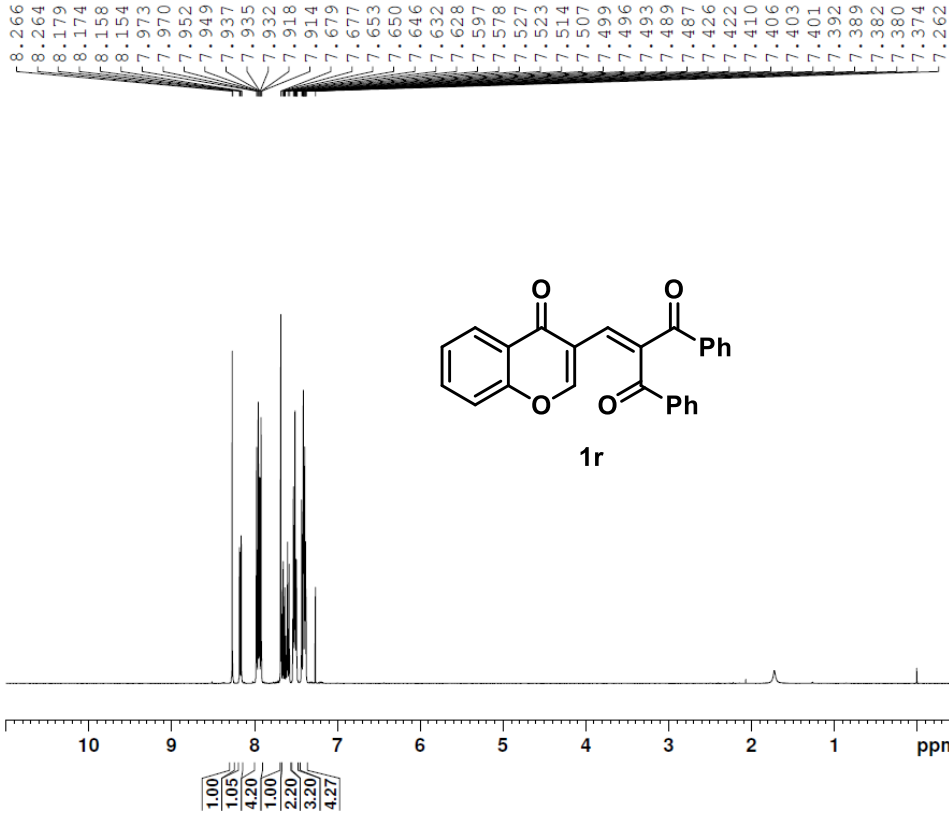

Current Data Parameters  
NAME JN-020(3f)  
EXPNO 4  
PROCNO 1

F2 - Acquisition Parameters  
Date\_ 20240601  
Time 19.24  
INSTRUM spect  
PROBHD 5 mm PABBO BB/  
PULPROG zg30  
TD 32768  
SOLVENT CDCl3  
NS 7  
DS 0  
SWH 7211.539 Hz  
FIDRES 0.220079 Hz  
AQ 2.2719147 sec  
RG 89.08  
DW 69.333 usec  
DE 10.06 usec  
TE 298.1 K  
D1 2.00000000 sec  
TD0 1

===== CHANNEL f1 =====  
SFO1 400.1324008 MHz  
NUC1 1H  
P1 15.00 usec  
PLW1 13.50000000 W

F2 - Processing parameters  
SI 16384  
SF 400.1300087 MHz  
WDW EM  
SSB 0  
LB 0 Hz  
GB 0  
PC 1.00

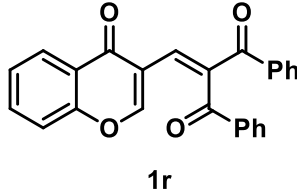

<sup>13</sup>C NMR spectrum of compound 1r (CDCl<sub>3</sub>, 100 MHz)

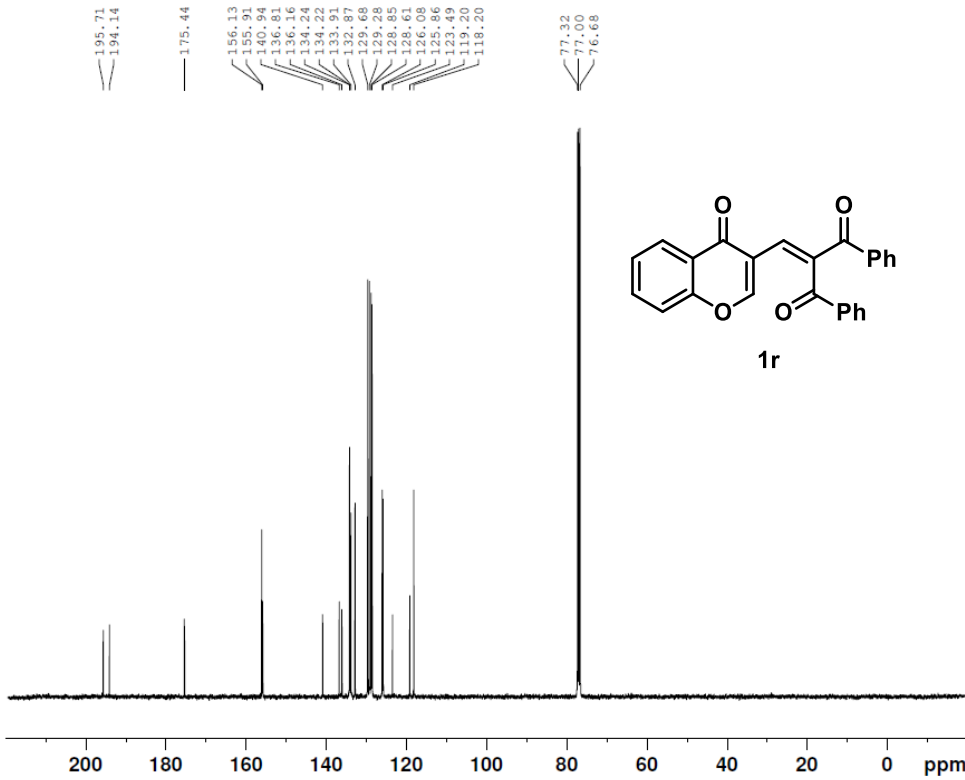

Current Data Parameters  
NAME JN-020(3f)  
EXPNO 5  
PROCNO 1

F2 - Acquisition Parameters  
Date\_ 20240601  
Time 19.26  
INSTRUM spect  
PROBHD 5 mm PABBO BB/  
PULPROG zgpg30  
TD 32768  
SOLVENT CDCl3  
NS 1103  
DS 0  
SWH 24038.461 Hz  
FIDRES 0.733596 Hz  
AQ 0.6815744 sec  
RG 198.09  
DW 20.800 usec  
DE 6.50 usec  
TE 298.5 K  
D1 2.00000000 sec  
D11 0.03000000 sec  
TD0 1

===== CHANNEL f1 =====  
SFO1 100.6228298 MHz  
NUC1 13C  
P1 10.00 usec  
PLW1 49.50000000 W

===== CHANNEL f2 =====  
SFO2 400.1316005 MHz  
NUC2 1H  
CPDPRG[2] waltz16  
PCPD2 90.00 usec  
PLW2 12.50000000 W  
PLW12 0.34722000 W  
PLW13 0.28125000 W

F2 - Processing parameters  
SI 32768  
SF 100.6127734 MHz  
WDW EM  
SSB 0  
LB 2.00 Hz  
GB 0  
PC 1.00

### <sup>1</sup>H NMR spectrum of compound 3a (CDCl<sub>3</sub>, 400 MHz)

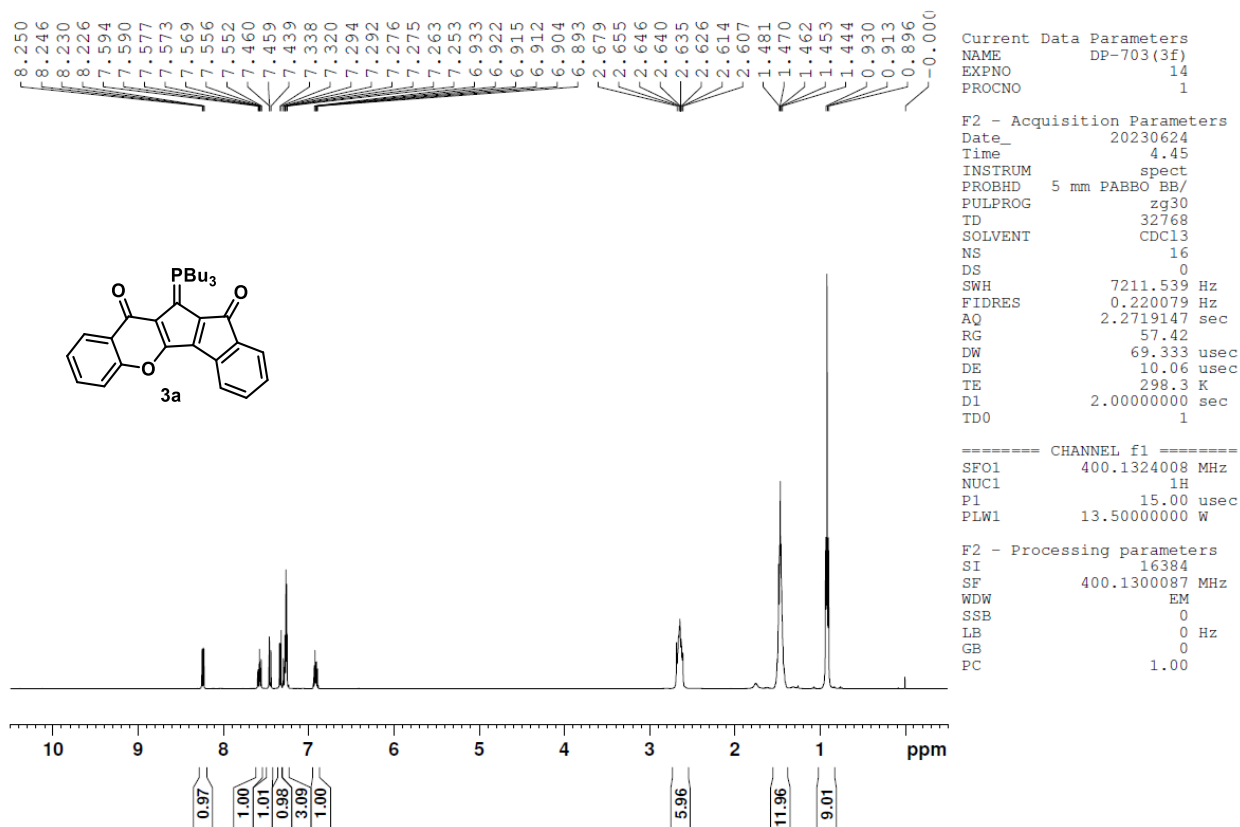

### <sup>13</sup>C NMR spectrum of compound 3a (CDCl<sub>3</sub>, 100 MHz)

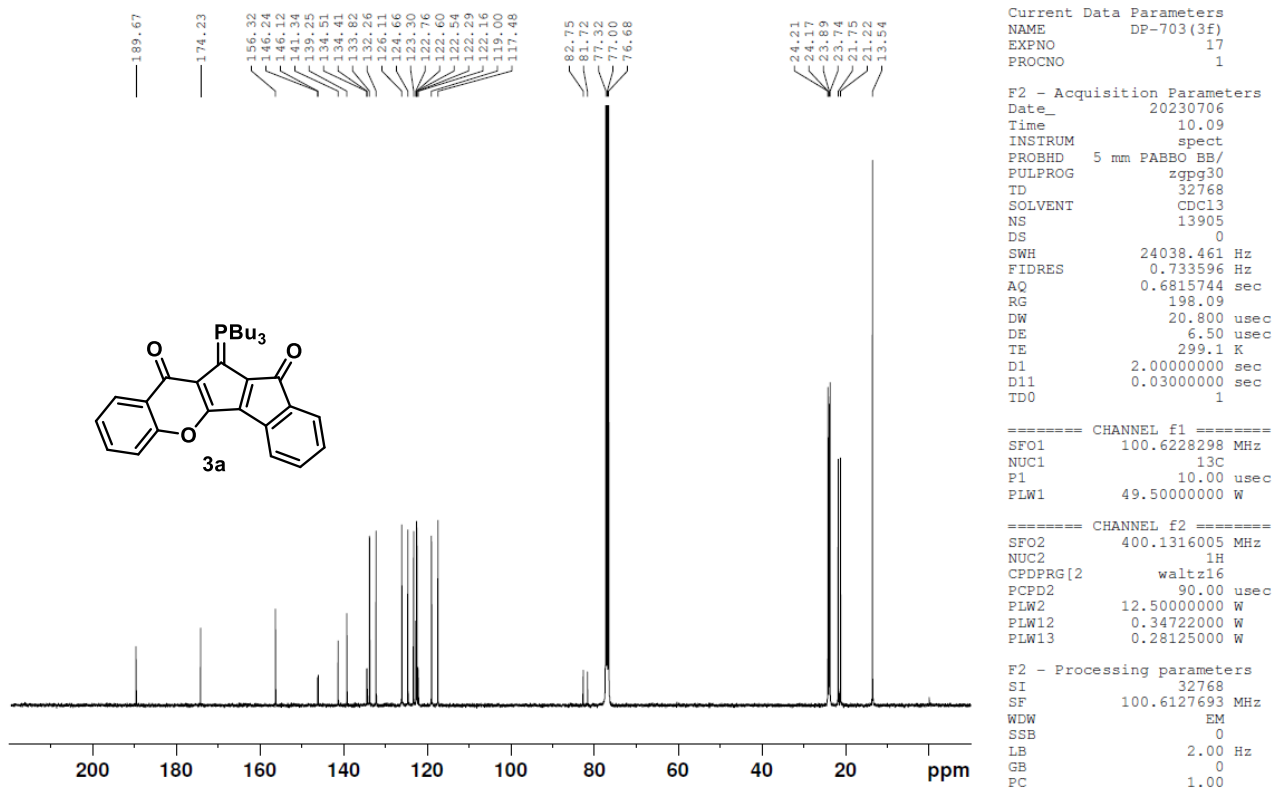

<sup>31</sup>P NMR spectrum of compound 3a (CDCl<sub>3</sub>, 162 MHz)

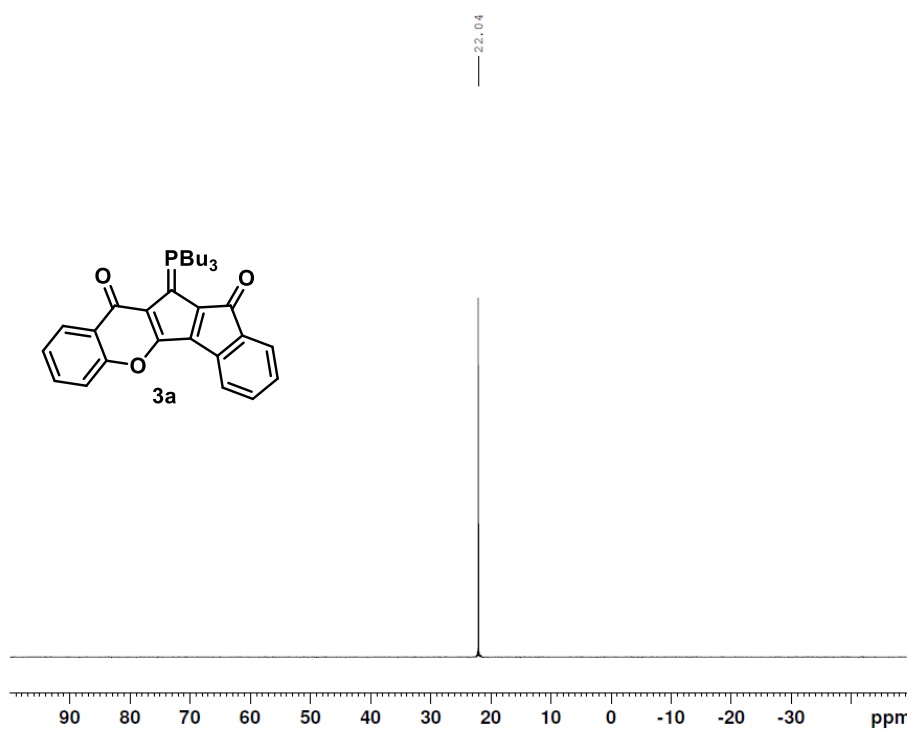

```

Current Data Parameters
NAME          DP-703(3F)
EXPNO         11
PROCNO        1

F2 - Acquisition Parameters
Date_         20230624
Time          2.45
INSTRUM       spect
PROBHD        5 mm PABBO BB/
PULPROG       zgpg30
TD            65536
SOLVENT       CDCl3
NS            16
DS            4
SWH           49019.609 Hz
FIDRES        0.747980 Hz
AQ            0.6684672 sec
RG            198.09
DW            10.200 usec
DE            6.50 usec
TE            298.9 K
D1            2.0000000 sec
D11           0.0300000 sec
TD0           1

===== CHANNEL f1 =====
SFO1          161.9836917 MHz
NUC1           31P
P1            15.00 usec
PLW1          13.19999981 W

===== CHANNEL f2 =====
SFO2          400.1316005 MHz
NUC2           1H
CPDPRG[2]     waltz16
PCPD2         90.00 usec
PLW2          12.50000000 W
PLW12         0.34722000 W
PLW13         0.28125000 W

F2 - Processing parameters
SI            32768
SF            161.9755930 MHz
WDW           EM
SSB           0
LB            2.00 Hz
GB            0
PC            1.40
    
```

<sup>1</sup>H NMR spectrum of compound 3b (CDCl<sub>3</sub>, 400 MHz)

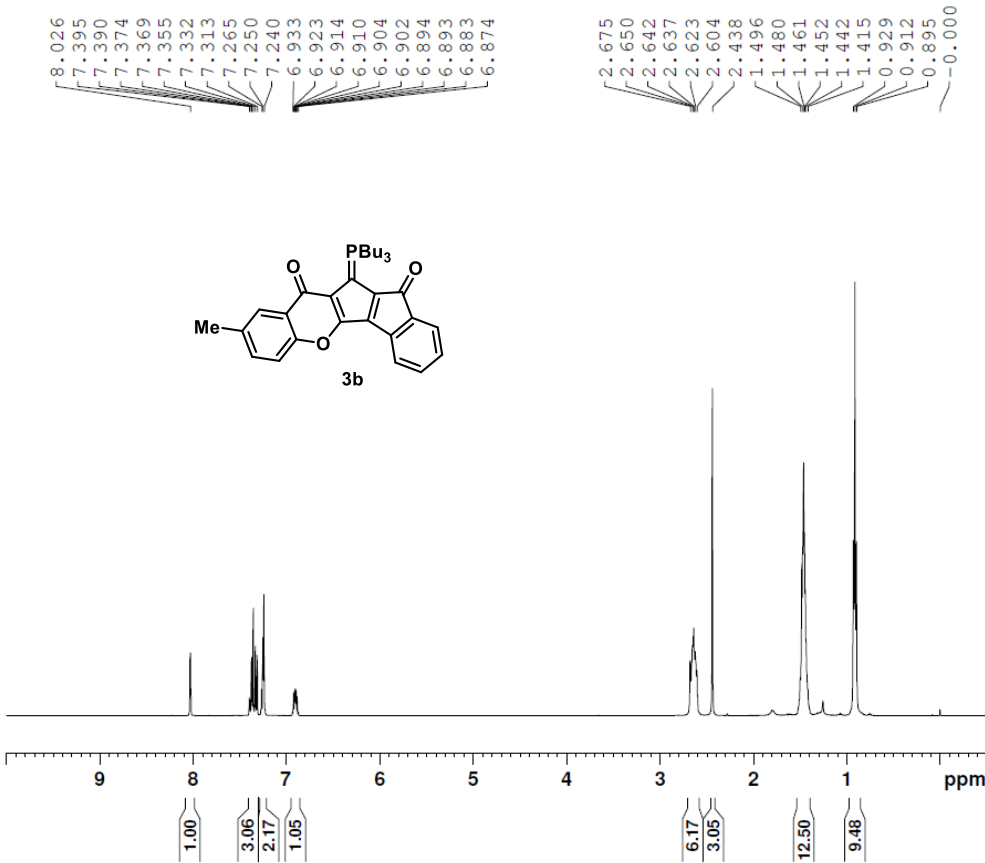

```

Current Data Parameters
NAME          DP-1173(3F)
EXPNO         4
PROCNO        1

F2 - Acquisition Parameters
Date_         20240305
Time          13.03
INSTRUM       spect
PROBHD        5 mm PABBO BB/
PULPROG       zg30
TD            32768
SOLVENT       CDCl3
NS            16
DS            0
SWH           7211.539 Hz
FIDRES        0.220079 Hz
AQ            2.2719147 sec
RG            38.89
DW            69.333 usec
DE            10.06 usec
TE            298.0 K
D1            2.0000000 sec
TD0           1

===== CHANNEL f1 =====
SFO1          400.1324008 MHz
NUC1           1H
P1            15.00 usec
PLW1          13.50000000 W

F2 - Processing parameters
SI            16384
SF            400.1300079 MHz
WDW           EM
SSB           0
LB            0 Hz
GB            0
PC            1.00
    
```

<sup>13</sup>C NMR spectrum of compound **3b** (CDCl<sub>3</sub>, 100 MHz)

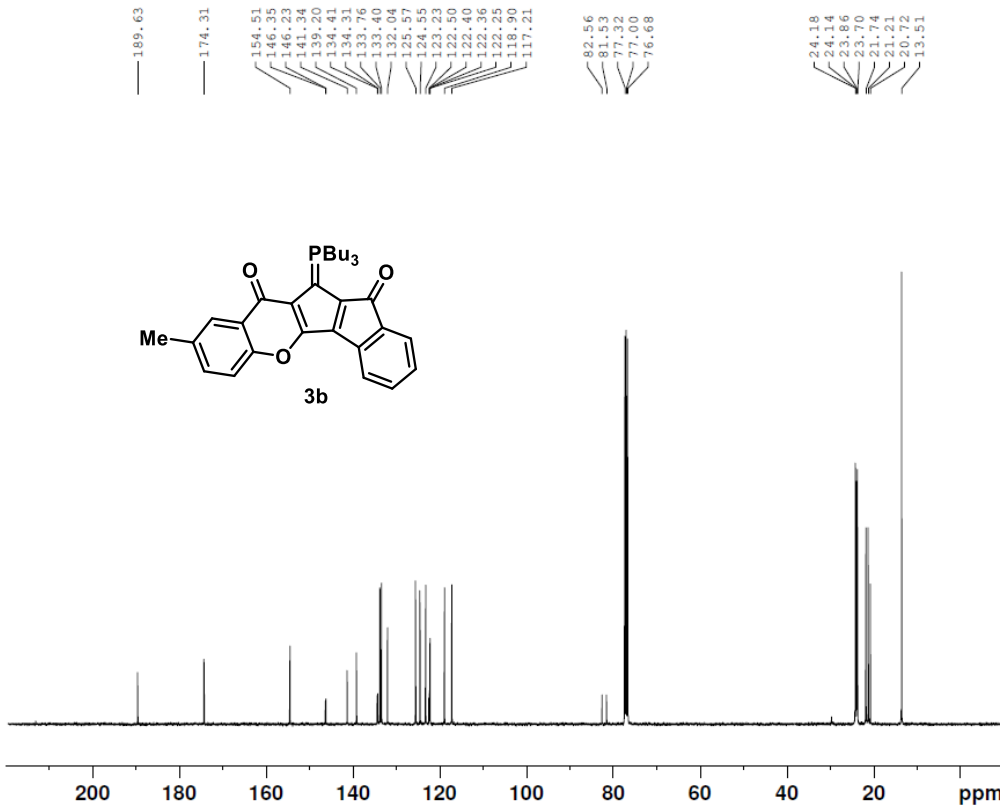

Current Data Parameters  
NAME DP-1173(3f)  
EXPNO 5  
PROCNO 1

F2 - Acquisition Parameters  
Date\_ 20240305  
Time 13.05  
INSTRUM spect  
PROBHD 5 mm PABBO BB/  
PULPROG zgpg30  
TD 32768  
SOLVENT CDCl3  
NS 1493  
DS 0  
SWH 24038.461 Hz  
FIDRES 0.733596 Hz  
AQ 0.6815744 sec  
RG 198.09  
DW 20.800 usec  
DE 6.50 usec  
TE 298.2 K  
D1 2.00000000 sec  
D11 0.03000000 sec  
TD0 1

==== CHANNEL f1 =====  
SFO1 100.6228298 MHz  
NUC1 13C  
P1 10.00 usec  
PLW1 49.50000000 W

==== CHANNEL f2 =====  
SFO2 400.1316005 MHz  
NUC2 1H  
CPDPRG[2] waltz16  
PCPD2 90.00 usec  
PLW2 12.50000000 W  
PLW12 0.34722000 W  
PLW13 0.28125000 W

F2 - Processing parameters  
SI 32768  
SF 100.6127738 MHz  
WDW EM  
SSB 0  
LB 2.00 Hz  
GB 0  
PC 1.00

<sup>31</sup>P NMR spectrum of compound **3b** (CDCl<sub>3</sub>, 162 MHz)

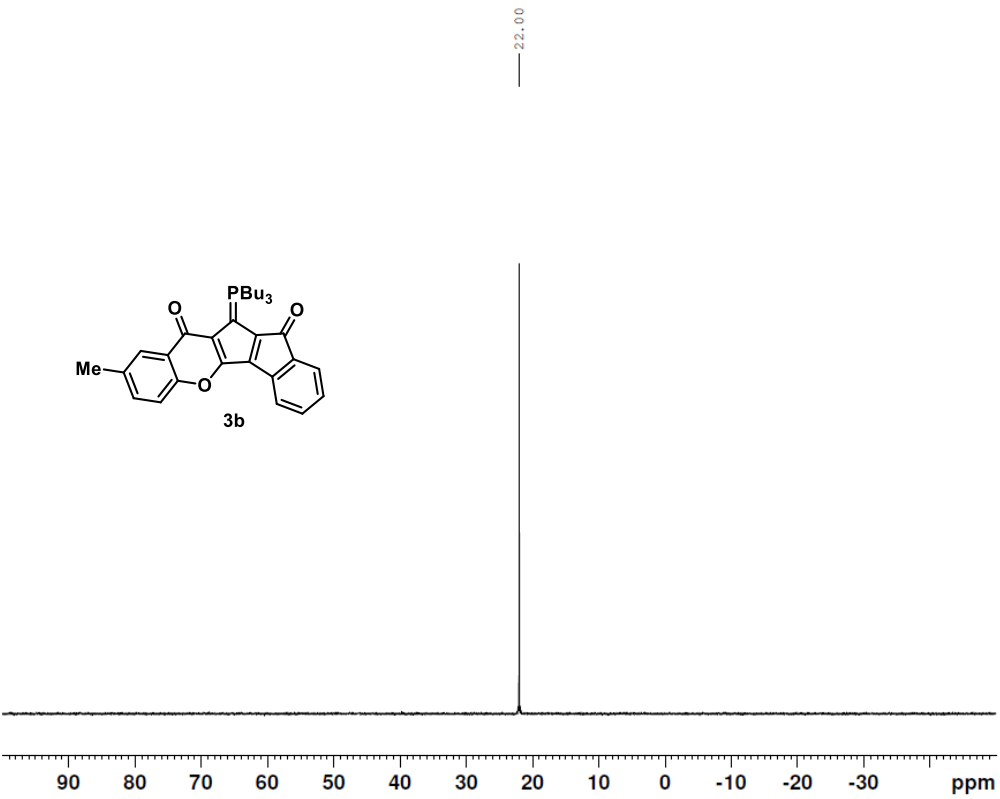

Current Data Parameters  
NAME DP-1173(3f)  
EXPNO 1  
PROCNO 1

F2 - Acquisition Parameters  
Date\_ 20240229  
Time 16.09  
INSTRUM spect  
PROBHD 5 mm PABBO BB/  
PULPROG zgpg30  
TD 65536  
SOLVENT CDCl3  
NS 6  
DS 4  
SWH 49019.609 Hz  
FIDRES 0.747980 Hz  
AQ 0.6684672 sec  
RG 198.09  
DW 10.200 usec  
DE 6.50 usec  
TE 298.2 K  
D1 2.00000000 sec  
D11 0.03000000 sec  
TD0 1

==== CHANNEL f1 =====  
SFO1 161.9836917 MHz  
NUC1 31P  
P1 15.00 usec  
PLW1 13.19999981 W

==== CHANNEL f2 =====  
SFO2 400.1316005 MHz  
NUC2 1H  
CPDPRG[2] waltz16  
PCPD2 90.00 usec  
PLW2 12.50000000 W  
PLW12 0.34722000 W  
PLW13 0.28125000 W

F2 - Processing parameters  
SI 32768  
SF 161.9755930 MHz  
WDW EM  
SSB 0  
LB 2.00 Hz  
GB 0  
PC 1.40

**<sup>1</sup>H NMR spectrum of compound 3c (CDCl<sub>3</sub>, 400 MHz)**

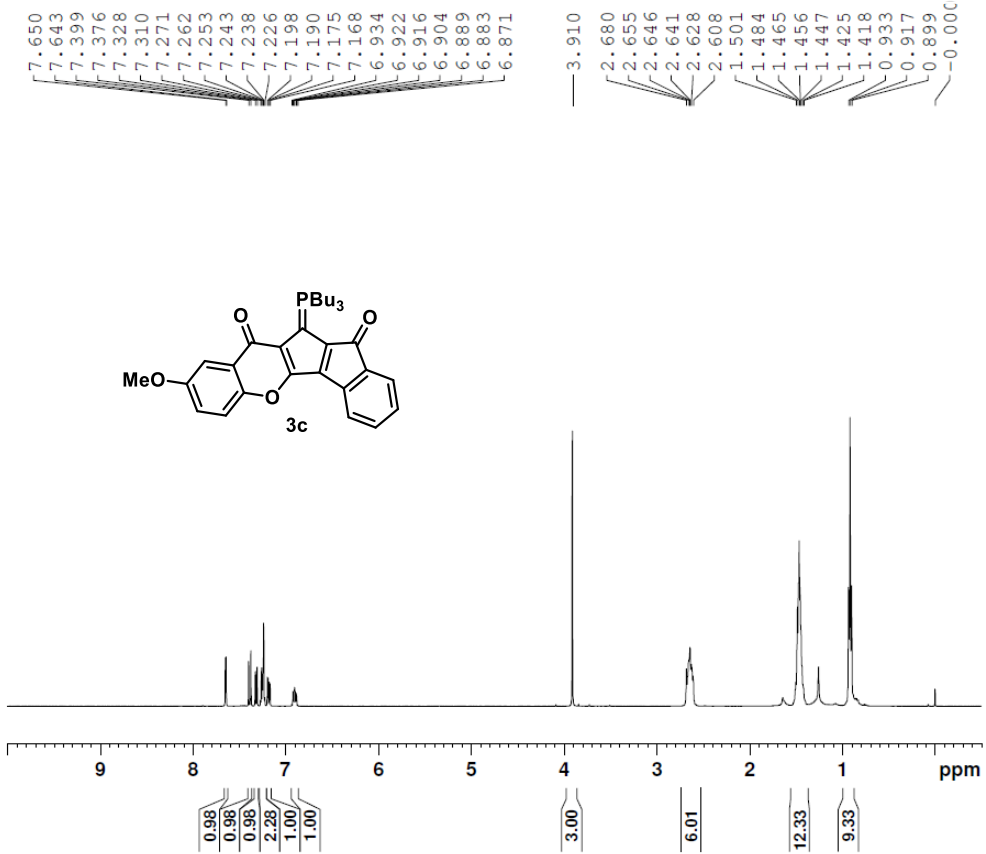

Current Data Parameters  
NAME DP-1169(3f)  
EXPNO 4  
PROCNO 1

F2 - Acquisition Parameters  
Date\_ 20240309  
Time 22.46  
INSTRUM spect  
PROBHD 5 mm PABBO BB/  
PULPROG zg30  
TD 32768  
SOLVENT CDCl3  
NS 16  
DS 0  
SWH 7211.539 Hz  
FIDRES 0.220079 Hz  
AQ 2.2719147 sec  
RG 78.51  
DW 69.333 usec  
DE 10.06 usec  
TE 298.8 K  
D1 2.0000000 sec  
TD0 1

===== CHANNEL f1 =====  
SFO1 400.1324008 MHz  
NUC1 1H  
P1 15.00 usec  
PLW1 13.5000000 W

F2 - Processing parameters  
SI 16384  
SF 400.1300088 MHz  
WDW EM  
SSB 0  
LB 0 Hz  
GB 0  
PC 1.00

**<sup>13</sup>C NMR spectrum of compound 3c (CDCl<sub>3</sub>, 100 MHz)**

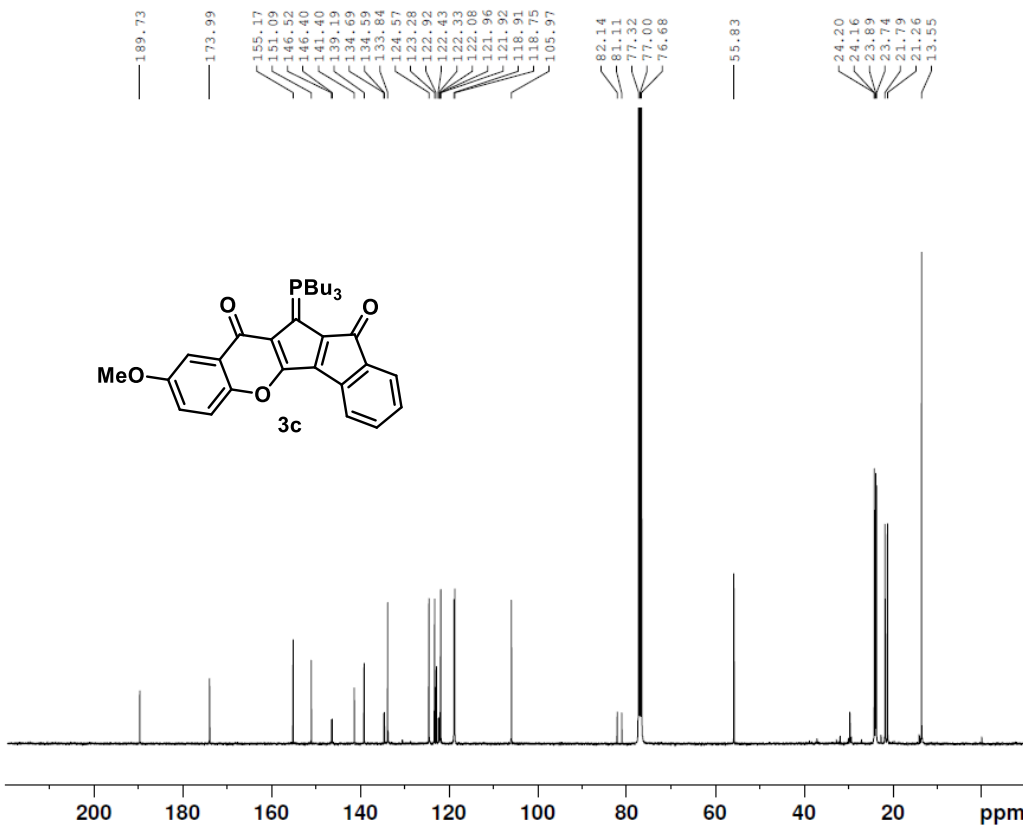

Current Data Parameters  
NAME DP-1169(3f)  
EXPNO 5  
PROCNO 1

F2 - Acquisition Parameters  
Date\_ 20240309  
Time 22.48  
INSTRUM spect  
PROBHD 5 mm PABBO BB/  
PULPROG zgpg30  
TD 32768  
SOLVENT CDCl3  
NS 16934  
DS 0  
SWH 24038.461 Hz  
FIDRES 0.733596 Hz  
AQ 0.6815744 sec  
RG 198.09  
DW 20.800 usec  
DE 6.50 usec  
TE 298.6 K  
D1 2.0000000 sec  
D11 0.0300000 sec  
TD0 1

===== CHANNEL f1 =====  
SFO1 100.6228298 MHz  
NUC1 13C  
P1 10.00 usec  
PLW1 49.5000000 W

===== CHANNEL f2 =====  
SFO2 400.1316005 MHz  
NUC2 1H  
CPDPRG[2] waltz16  
PCPD2 90.00 usec  
PLW2 12.5000000 W  
PLW12 0.34722000 W  
PLW13 0.28125000 W

F2 - Processing parameters  
SI 32768  
SF 100.6127703 MHz  
WDW EM  
SSB 0  
LB 2.00 Hz  
GB 0  
PC 1.00

<sup>31</sup>P NMR spectrum of compound 3c (CDCl<sub>3</sub>, 162 MHz)

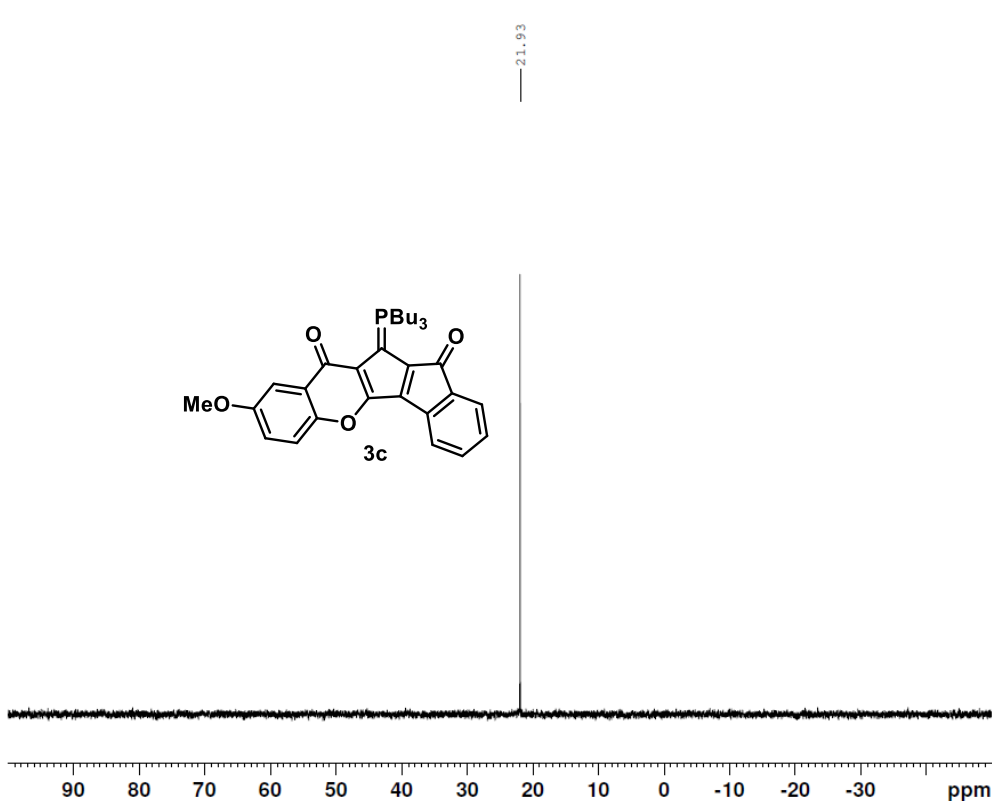

Current Data Parameters  
NAME DP-1169(3f)  
EXPNO 1  
PROCNO 1

F2 - Acquisition Parameters  
Date\_ 20240226  
Time 21.12  
INSTRUM spect  
PROBHD 5 mm PABBO BB/  
PULPROG zgpg30  
TD 65536  
SOLVENT CDCl3  
NS 7  
DS 4  
SWH 49019.609 Hz  
FIDRES 0.747980 Hz  
AQ 0.6684672 sec  
RG 198.09  
DW 10.200 usec  
DE 6.50 usec  
TE 297.5 K  
D1 2.0000000 sec  
D11 0.0300000 sec  
TD0 1

==== CHANNEL f1 =====  
SFO1 161.9836917 MHz  
NUC1 31P  
P1 15.00 usec  
PLW1 13.19999981 W

==== CHANNEL f2 =====  
SFO2 400.1316005 MHz  
NUC2 1H  
CPDPRG[2] waltz16  
PCPD2 90.00 usec  
PLW2 12.50000000 W  
PLW12 0.34722000 W  
PLW13 0.28125000 W

F2 - Processing parameters  
SI 32768  
SF 161.9755930 MHz  
WDW EM  
SSB 0  
LB 2.00 Hz  
GB 0  
PC 1.40

<sup>1</sup>H NMR spectrum of compound 3d (CDCl<sub>3</sub>, 400 MHz)

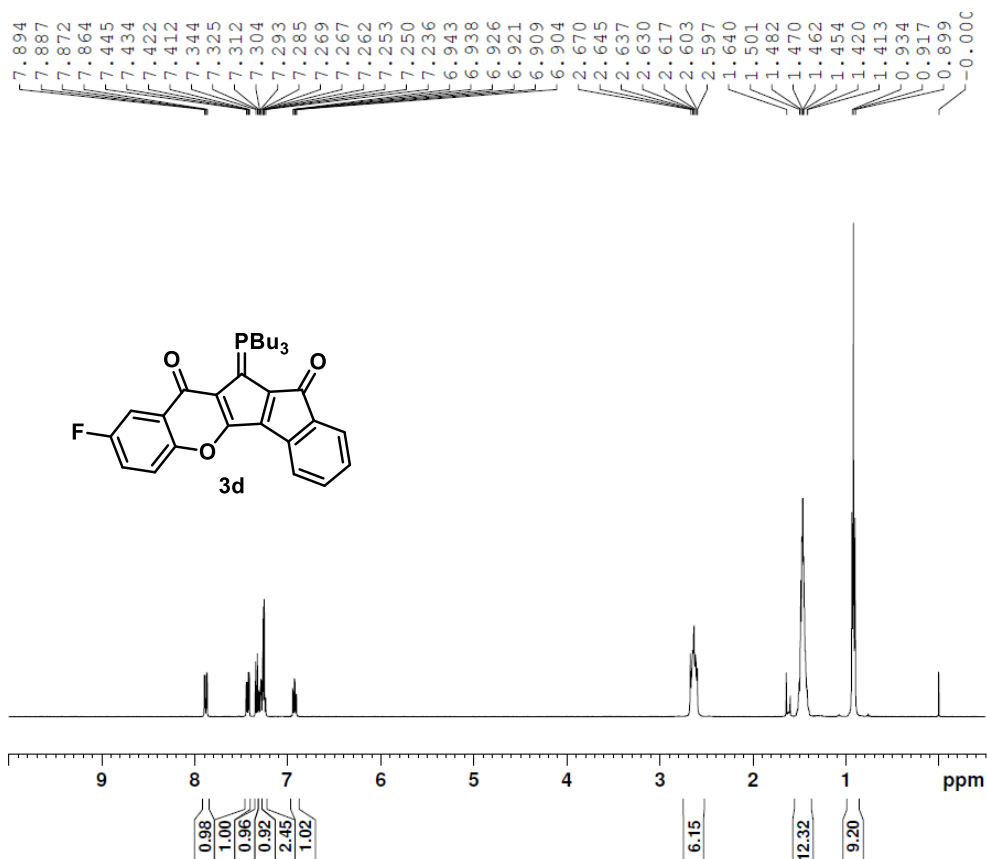

Current Data Parameters  
NAME DP-1184(3f)  
EXPNO 4  
PROCNO 1

F2 - Acquisition Parameters  
Date\_ 20240308  
Time 21.52  
INSTRUM spect  
PROBHD 5 mm PABBO BB/  
PULPROG zg30  
TD 32768  
SOLVENT CDCl3  
NS 16  
DS 0  
SWH 7211.539 Hz  
FIDRES 0.220079 Hz  
AQ 2.2719147 sec  
RG 89.08  
DW 69.333 usec  
DE 10.06 usec  
TE 298.0 K  
D1 2.0000000 sec  
TD0 1

==== CHANNEL f1 =====  
SFO1 400.1324008 MHz  
NUC1 1H  
P1 15.00 usec  
PLW1 13.50000000 W

F2 - Processing parameters  
SI 16384  
SF 400.1300088 MHz  
WDW EM  
SSB 0  
LB 0 Hz  
GB 0  
PC 1.00

**<sup>13</sup>C NMR spectrum of compound 3d (CDCl<sub>3</sub>, 100 MHz)**

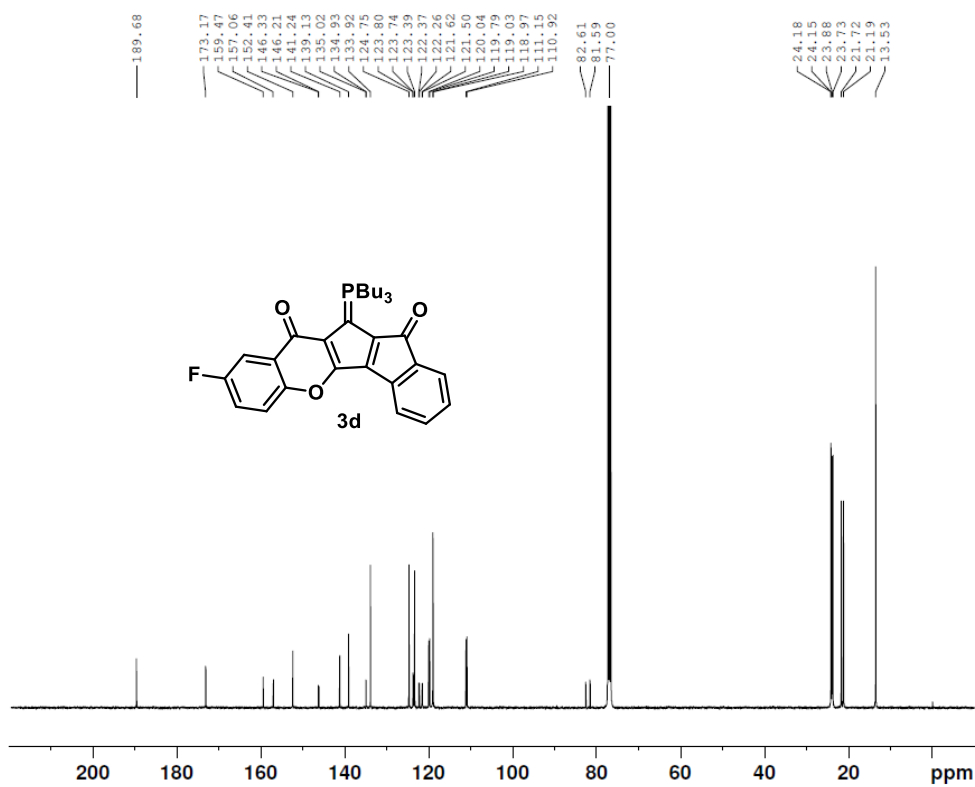

Current Data Parameters  
NAME DP-1184(3f)  
EXPNO 5  
PROCNO 1

F2 - Acquisition Parameters  
Date\_ 20240308  
Time 21.54  
INSTRUM spect  
PROBHD 5 mm PABBO BB/  
PULPROG zgpg30  
TD 32768  
SOLVENT CDCl3  
NS 14262  
DS 0  
SWH 24038.461 Hz  
FIDRES 0.733596 Hz  
AQ 0.6815744 sec  
RG 198.09  
DW 20.800 usec  
DE 6.50 usec  
TE 298.2 K  
D1 2.00000000 sec  
D11 0.03000000 sec  
TD0 1

===== CHANNEL f1 =====  
SFO1 100.6228298 MHz  
NUC1 13C  
P1 10.00 usec  
PLW1 49.50000000 W

===== CHANNEL f2 =====  
SFO2 400.1316005 MHz  
NUC2 1H  
CPDPRG[2] waltz16  
PCPD2 90.00 usec  
PLW2 12.50000000 W  
PLW12 0.34722000 W  
PLW13 0.28125000 W

F2 - Processing parameters  
SI 32768  
SF 100.6127698 MHz  
WDW EM  
SSB 0  
LB 2.00 Hz  
GB 0  
PC 1.00

**<sup>31</sup>P NMR spectrum of compound 3d (CDCl<sub>3</sub>, 162 MHz)**

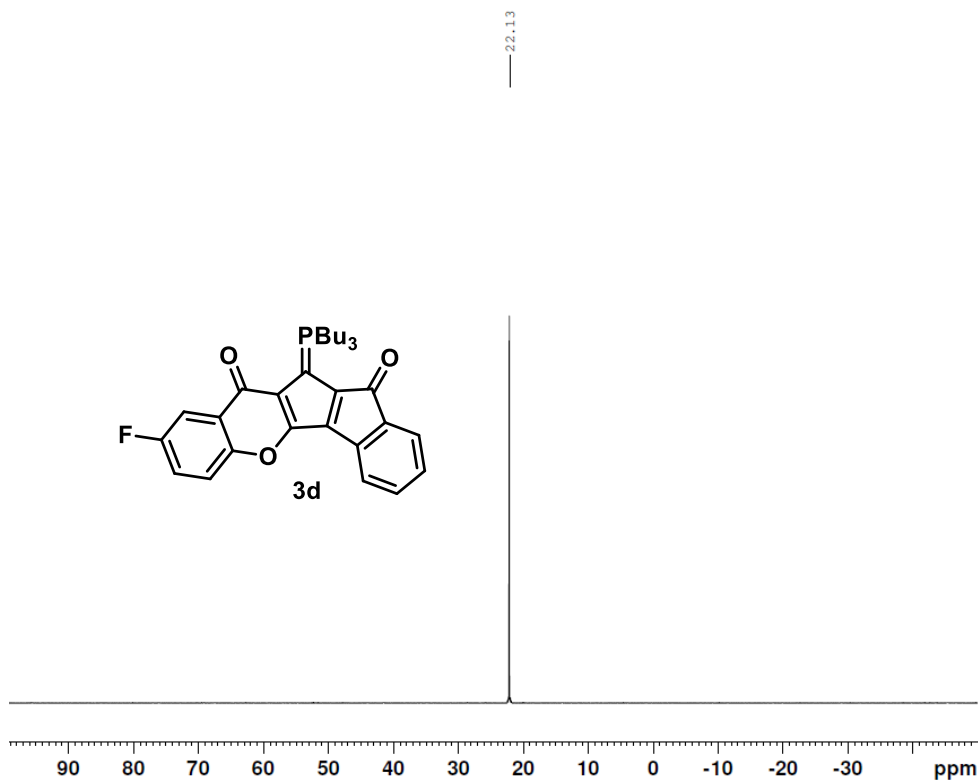

Current Data Parameters  
NAME DP-1184(3f)  
EXPNO 6  
PROCNO 1

F2 - Acquisition Parameters  
Date\_ 20240311  
Time 11.24  
INSTRUM spect  
PROBHD 5 mm PABBO BB/  
PULPROG zgpg30  
TD 65536  
SOLVENT CDCl3  
NS 16  
DS 4  
SWH 49019.609 Hz  
FIDRES 0.747980 Hz  
AQ 0.6684672 sec  
RG 198.09  
DW 10.200 usec  
DE 6.50 usec  
TE 298.5 K  
D1 2.00000000 sec  
D11 0.03000000 sec  
TD0 1

===== CHANNEL f1 =====  
SFO1 161.9836917 MHz  
NUC1 31P  
P1 15.00 usec  
PLW1 13.19999981 W

===== CHANNEL f2 =====  
SFO2 400.1316005 MHz  
NUC2 1H  
CPDPRG[2] waltz16  
PCPD2 90.00 usec  
PLW2 12.50000000 W  
PLW12 0.34722000 W  
PLW13 0.28125000 W

F2 - Processing parameters  
SI 32768  
SF 161.9755930 MHz  
WDW EM  
SSB 0  
LB 2.00 Hz  
GB 0  
PC 1.40



<sup>19</sup>F NMR spectrum of compound 3d (CDCl<sub>3</sub>, 376 MHz)

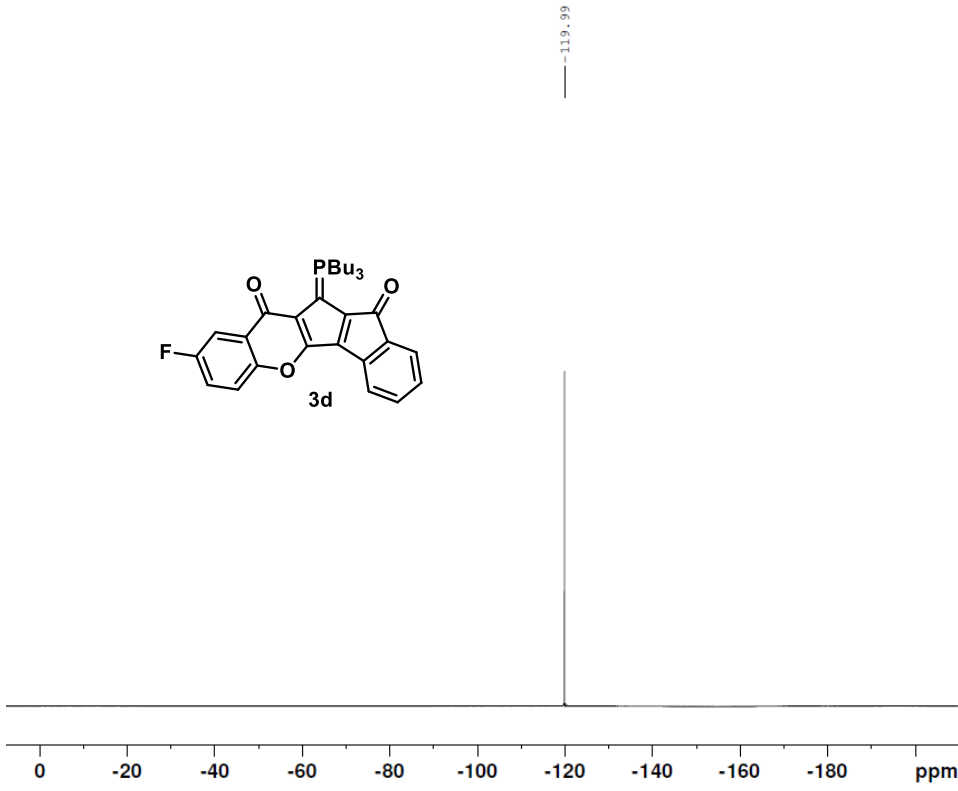

<sup>1</sup>H NMR spectrum of compound 3e (CDCl<sub>3</sub>, 400 MHz)

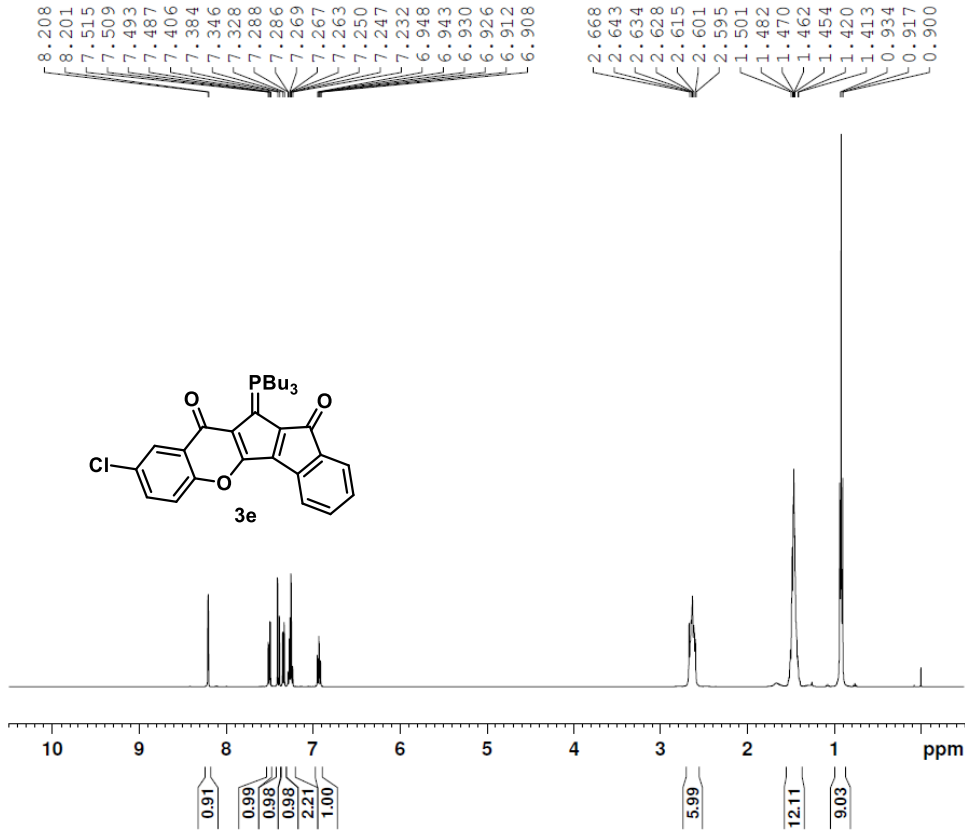

<sup>13</sup>C NMR spectrum of compound 3e (CDCl<sub>3</sub>, 100 MHz)

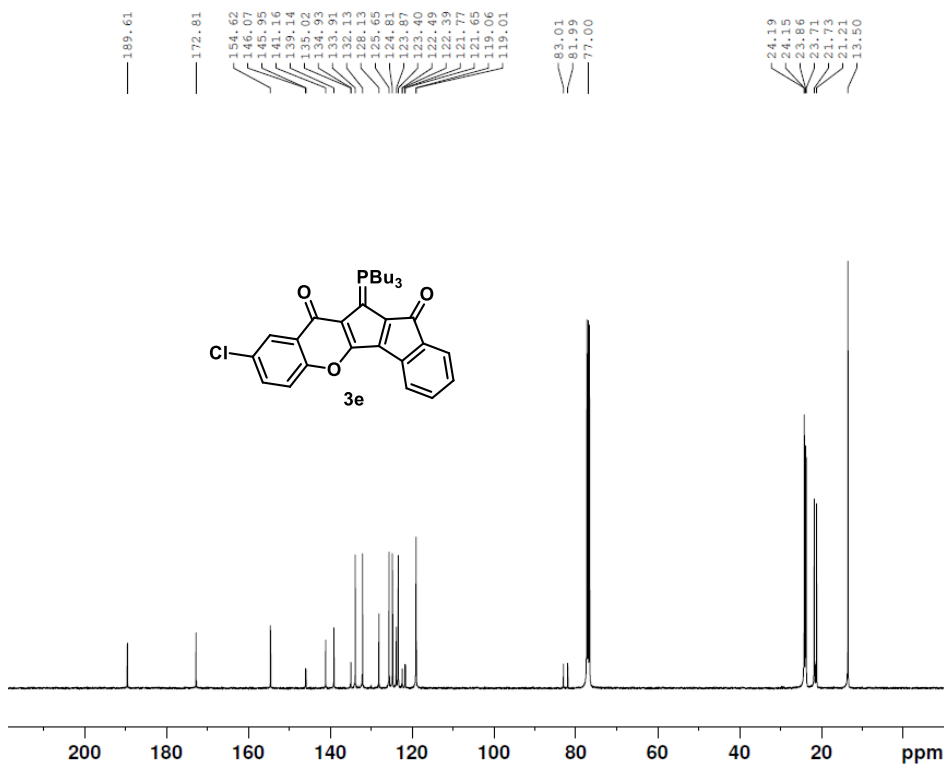

Current Data Parameters  
NAME DP-1150 (3f)  
EXPNO 5  
PROCNO 1

F2 - Acquisition Parameters  
Date\_ 20240219  
Time 22.13  
INSTRUM spect  
PROBHD 5 mm PABBO BB/  
PULPROG zgpg30  
TD 32768  
SOLVENT CDCl3  
NS 14958  
DS 0  
SWH 24038.461 Hz  
FIDRES 0.733596 Hz  
AQ 0.6815744 sec  
RG 198.09  
DW 20.800 usec  
DE 6.50 usec  
TE 299.1 K  
D1 2.00000000 sec  
D11 0.03000000 sec  
TD0 1

==== CHANNEL f1 =====  
SFO1 100.6228298 MHz  
NUC1 13C  
P1 10.00 usec  
PLW1 49.50000000 W

==== CHANNEL f2 =====  
SFO2 400.1316005 MHz  
NUC2 1H  
CPDPRG[2] waltz16  
PCPD2 90.00 usec  
PLW2 12.50000000 W  
PLW12 0.34722000 W  
PLW13 0.28125000 W

F2 - Processing parameters  
SI 32768  
SF 100.6127702 MHz  
WDW EM  
SSB 0  
LB 2.00 Hz  
GB 0  
PC 1.00

<sup>31</sup>P NMR spectrum of compound 3e (CDCl<sub>3</sub>, 162 MHz)

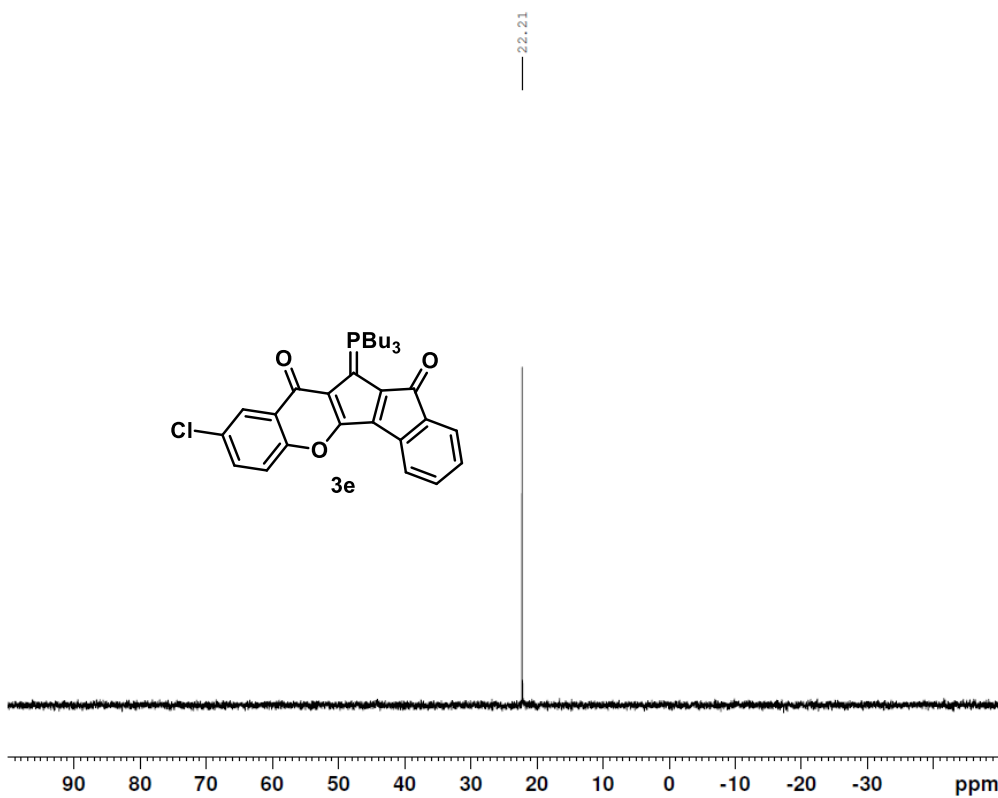

Current Data Parameters  
NAME DP-1150 (3f)  
EXPNO 1  
PROCNO 1

F2 - Acquisition Parameters  
Date\_ 20240311  
Time 11.15  
INSTRUM spect  
PROBHD 5 mm PABBO BB/  
PULPROG zgpg30  
TD 65536  
SOLVENT CDCl3  
NS 16  
DS 4  
SWH 49019.609 Hz  
FIDRES 0.747980 Hz  
AQ 0.6684672 sec  
RG 198.09  
DW 10.200 usec  
DE 6.50 usec  
TE 298.2 K  
D1 2.00000000 sec  
D11 0.03000000 sec  
TD0 1

==== CHANNEL f1 =====  
SFO1 161.9836917 MHz  
NUC1 31P  
P1 15.00 usec  
PLW1 13.19999981 W

==== CHANNEL f2 =====  
SFO2 400.1316005 MHz  
NUC2 1H  
CPDPRG[2] waltz16  
PCPD2 90.00 usec  
PLW2 12.50000000 W  
PLW12 0.34722000 W  
PLW13 0.28125000 W

F2 - Processing parameters  
SI 32768  
SF 161.9755930 MHz  
WDW EM  
SSB 0  
LB 2.00 Hz  
GB 0  
PC 1.40

<sup>1</sup>H NMR spectrum of compound 3f (CDCl<sub>3</sub>, 400 MHz)

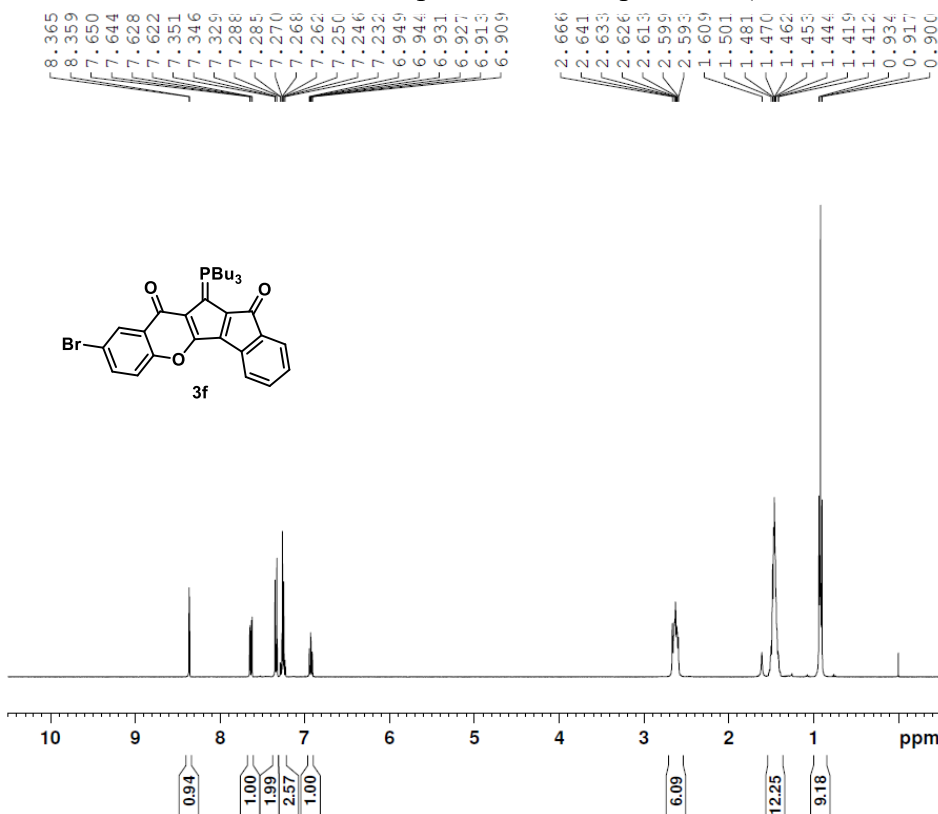

Current Data Parameters  
NAME DP-913(3f)  
EXPNO 15  
PROCNO 1

F2 - Acquisition Parameters  
Date\_ 20240222  
Time 14.35  
INSTRUM spect  
PROBHD 5 mm PABBO BB/  
PULPROG zg30  
TD 32768  
SOLVENT CDCl3  
NS 16  
DS 0  
SWH 7211.539 Hz  
FIDRES 0.220079 Hz  
AQ 2.2719147 sec  
RG 4.01  
DW 69.333 usec  
DE 10.06 usec  
TE 298.3 K  
D1 2.00000000 sec  
TD0 1

===== CHANNEL f1 =====  
SF01 400.1324008 MHz  
NUC1 1H  
P1 15.00 usec  
PLW1 13.50000000 W

F2 - Processing parameters  
SI 16384  
SF 400.1300089 MHz  
WDW EM  
SSB 0  
LB 0 Hz  
GB 0  
PC 1.00

<sup>13</sup>C NMR spectrum of compound 3f (CDCl<sub>3</sub>, 100 MHz)

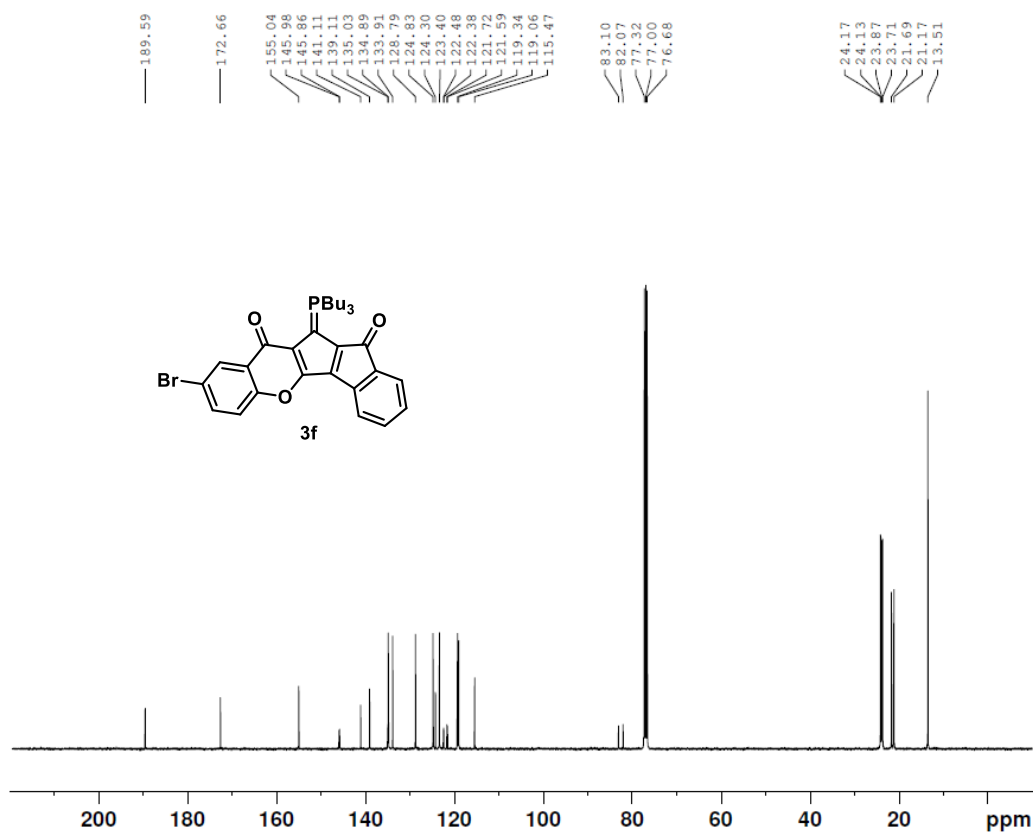

Current Data Parameters  
NAME DP-913(3f)  
EXPNO 14  
PROCNO 1

F2 - Acquisition Parameters  
Date\_ 20230924  
Time 14.52  
INSTRUM spect  
PROBHD 5 mm PABBO BB/  
PULPROG zgpg30  
TD 32768  
SOLVENT CDCl3  
NS 2744  
DS 0  
SWH 24038.461 Hz  
FIDRES 0.733596 Hz  
AQ 0.6815744 sec  
RG 198.09  
DW 20.800 usec  
DE 6.50 usec  
TE 298.5 K  
D1 2.00000000 sec  
D11 0.03000000 sec  
TD0 1

===== CHANNEL f1 =====  
SF01 100.6228298 MHz  
NUC1 13C  
P1 10.00 usec  
PLW1 49.50000000 W

===== CHANNEL f2 =====  
SF02 400.1316005 MHz  
NUC2 1H  
CPDPRG[2] waltz16  
PCPD2 90.00 usec  
PLW2 12.50000000 W  
PLW12 0.34722000 W  
PLW13 0.28125000 W

F2 - Processing parameters  
SI 32768  
SF 100.6127716 MHz  
WDW EM  
SSB 0  
LB 2.00 Hz  
GB 0  
PC 1.00

<sup>31</sup>P NMR spectrum of compound **3f** (CDCl<sub>3</sub>, 162 MHz)

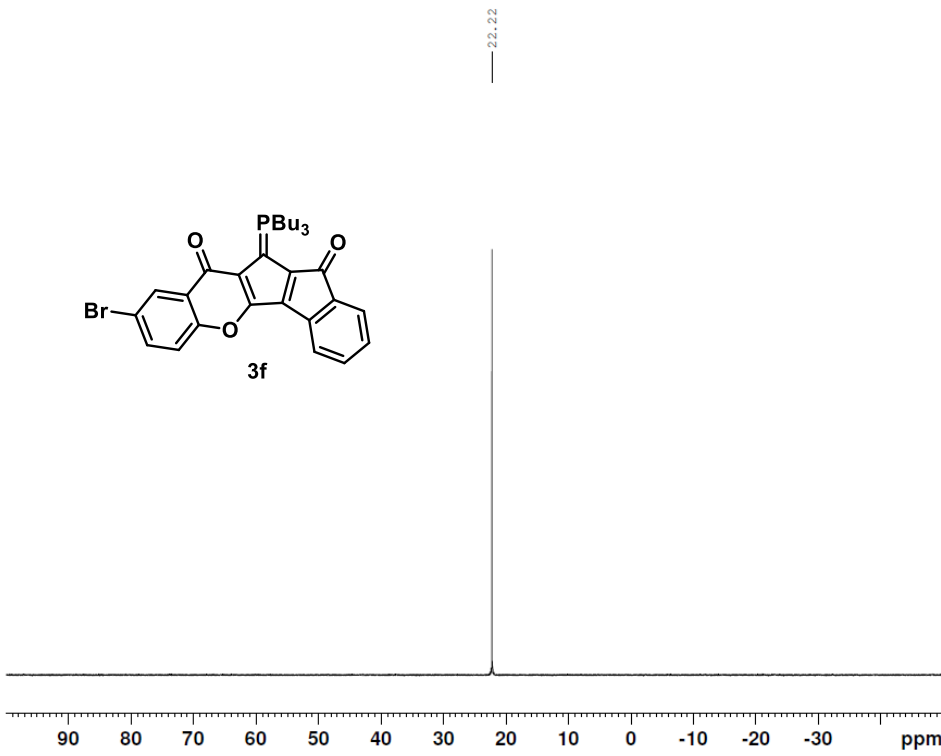

<sup>1</sup>H NMR spectrum of compound **3g** (CDCl<sub>3</sub>, 400 MHz)

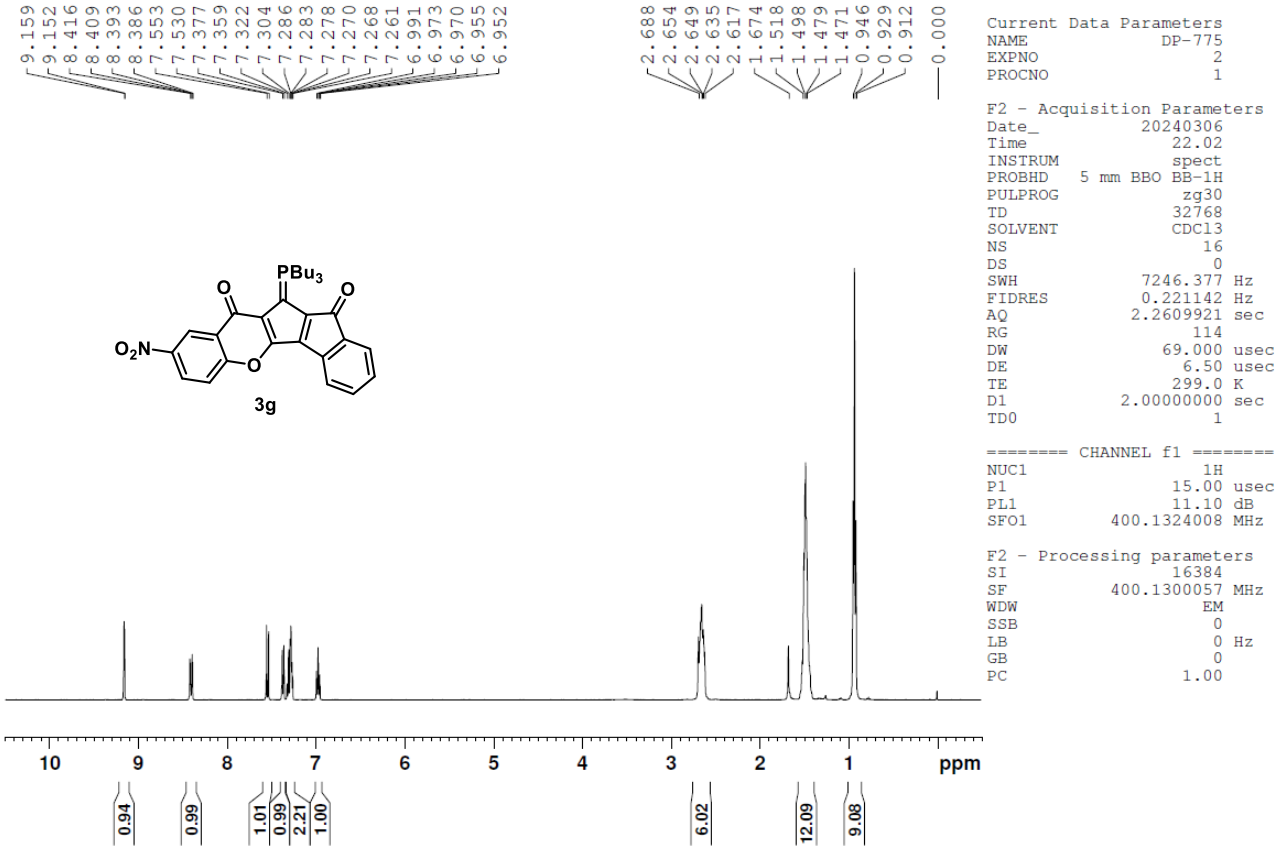

**<sup>13</sup>C NMR spectrum of compound 3g (CDCl<sub>3</sub>, 100 MHz)**

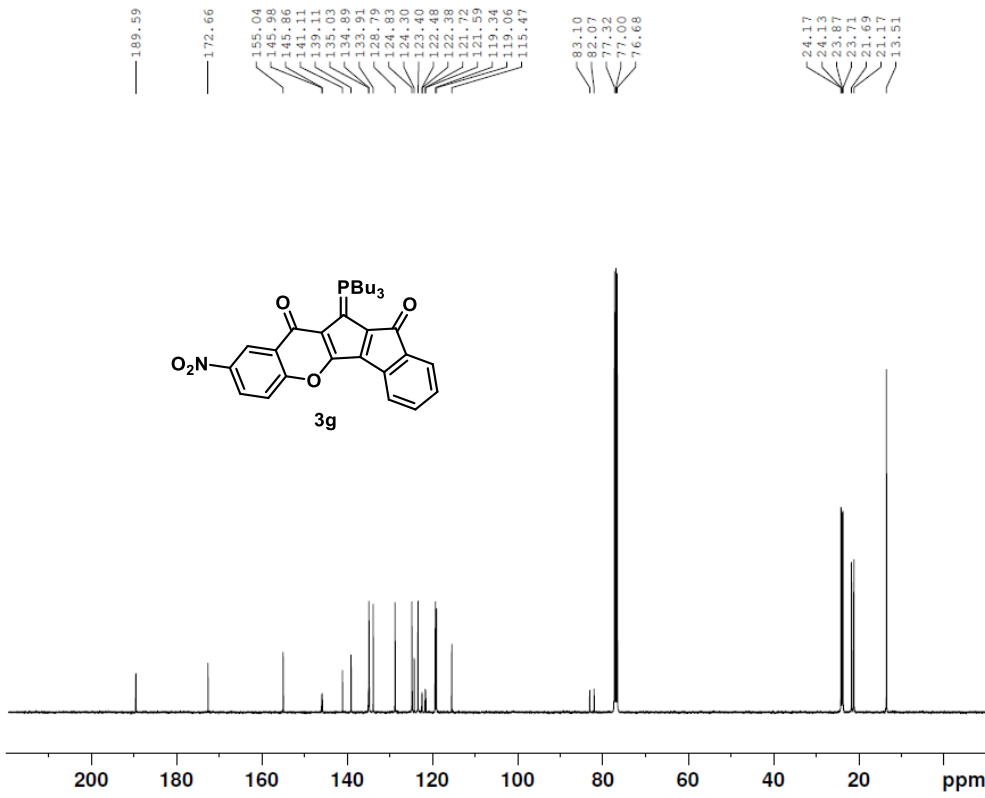

Current Data Parameters  
NAME DP-913(3f)  
EXPNO 14  
PROCNO 1

F2 - Acquisition Parameters  
Date\_ 20230924  
Time 14.52  
INSTRUM spect  
PROBHD 5 mm PABBO BB/  
PULPROG zgpg30  
TD 32768  
SOLVENT CDCl3  
NS 2744  
DS 0  
SWH 24038.461 Hz  
FIDRES 0.733596 Hz  
AQ 0.6815744 sec  
RG 198.09  
DW 20.800 usec  
DE 6.50 usec  
TE 298.5 K  
D1 2.00000000 sec  
D11 0.03000000 sec  
TD0 1

==== CHANNEL f1 =====  
SFO1 100.6228298 MHz  
NUC1 13C  
P1 10.00 usec  
PLW1 49.50000000 W

==== CHANNEL f2 =====  
SFO2 400.1316005 MHz  
NUC2 1H  
CPDPRG[2] waltz16  
PCPD2 90.00 usec  
PLW2 12.50000000 W  
PLW12 0.34722000 W  
PLW13 0.28125000 W

F2 - Processing parameters  
SI 32768  
SF 100.6127716 MHz  
WDW EM  
SSB 0  
LB 2.00 Hz  
GB 0  
PC 1.00

**<sup>31</sup>P NMR spectrum of compound 3g (CDCl<sub>3</sub>, 162 MHz)**

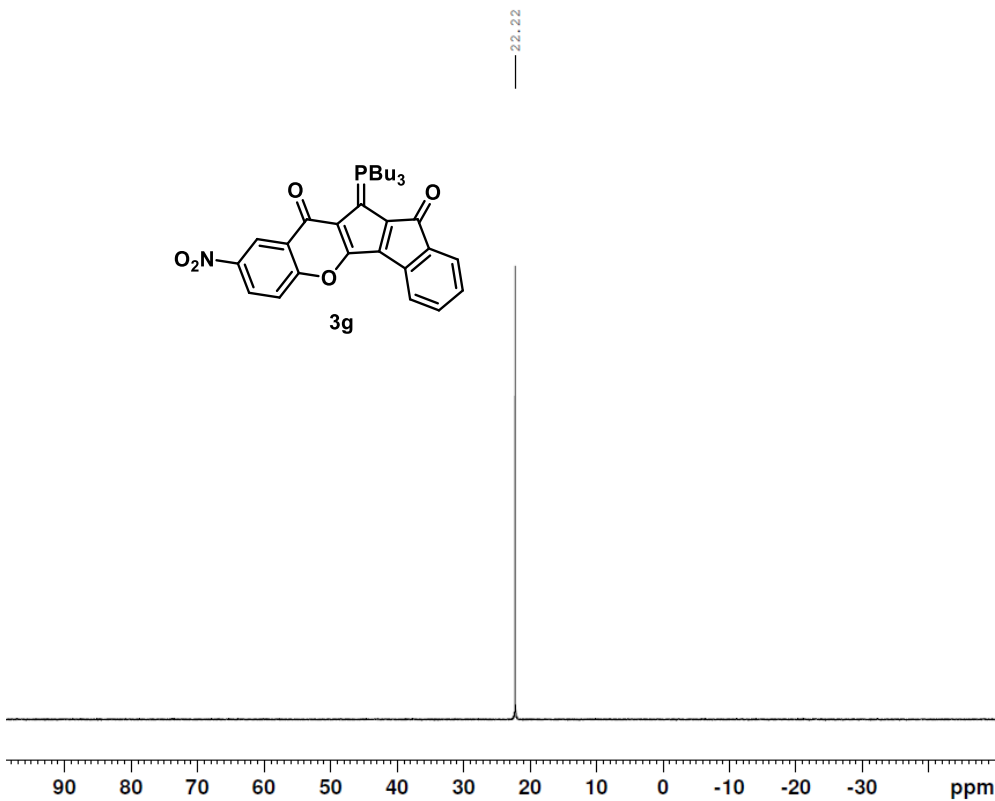

Current Data Parameters  
NAME DP-913(3f)  
EXPNO 16  
PROCNO 1

F2 - Acquisition Parameters  
Date\_ 20240222  
Time 14.34  
INSTRUM spect  
PROBHD 5 mm PABBO BB/  
PULPROG zgpg30  
TD 65536  
SOLVENT CDCl3  
NS 9  
DS 4  
SWH 49019.609 Hz  
FIDRES 0.747980 Hz  
AQ 0.6684672 sec  
RG 198.09  
DW 10.200 usec  
DE 6.50 usec  
TE 298.3 K  
D1 2.00000000 sec  
D11 0.03000000 sec  
TD0 1

==== CHANNEL f1 =====  
SFO1 161.9836917 MHz  
NUC1 31P  
P1 15.00 usec  
PLW1 13.19999981 W

==== CHANNEL f2 =====  
SFO2 400.1316005 MHz  
NUC2 1H  
CPDPRG[2] waltz16  
PCPD2 90.00 usec  
PLW2 12.50000000 W  
PLW12 0.34722000 W  
PLW13 0.28125000 W

F2 - Processing parameters  
SI 32768  
SF 161.9755930 MHz  
WDW EM  
SSB 0  
LB 2.00 Hz  
GB 0  
PC 1.40

<sup>1</sup>H NMR spectrum of compound **3h** (CDCl<sub>3</sub>, 400 MHz)

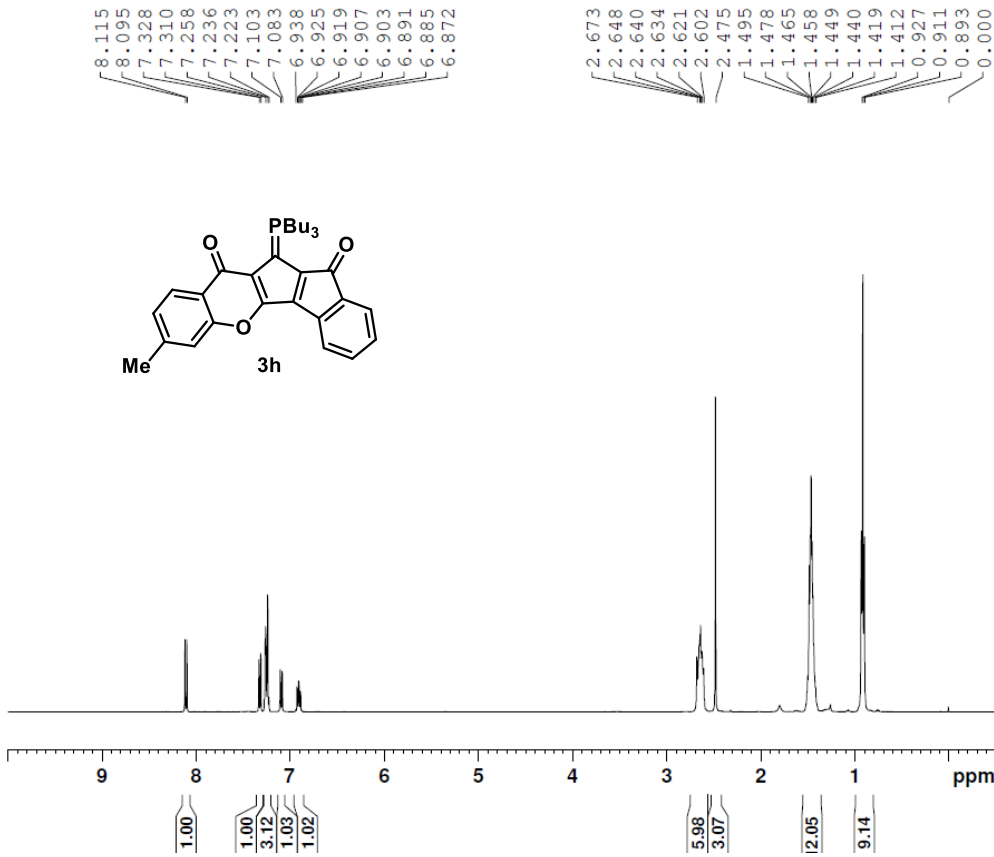

Current Data Parameters  
NAME DP-1219  
EXPNO 1  
PROCNO 1

F2 - Acquisition Parameters  
Date\_ 20240415  
Time 21.56  
INSTRUM spect  
PROBHD 5 mm BBO BB-1H  
PULPROG zg30  
TD 32768  
SOLVENT CDCl3  
NS 16  
DS 0  
SWH 7246.377 Hz  
FIDRES 0.221142 Hz  
AQ 2.2609921 sec  
RG 57  
DW 69.000 usec  
DE 6.50 usec  
TE 295.9 K  
D1 2.00000000 sec  
TD0 1

===== CHANNEL f1 =====  
NUC1 1H  
P1 15.00 usec  
PL1 11.10 dB  
SFO1 400.1324008 MHz

F2 - Processing parameters  
SI 16384  
SF 400.1300079 MHz  
WDW EM  
SSB 0  
LB 0 Hz  
GB 0  
PC 1.00

<sup>13</sup>C NMR spectrum of compound **3h** (CDCl<sub>3</sub>, 100 MHz)

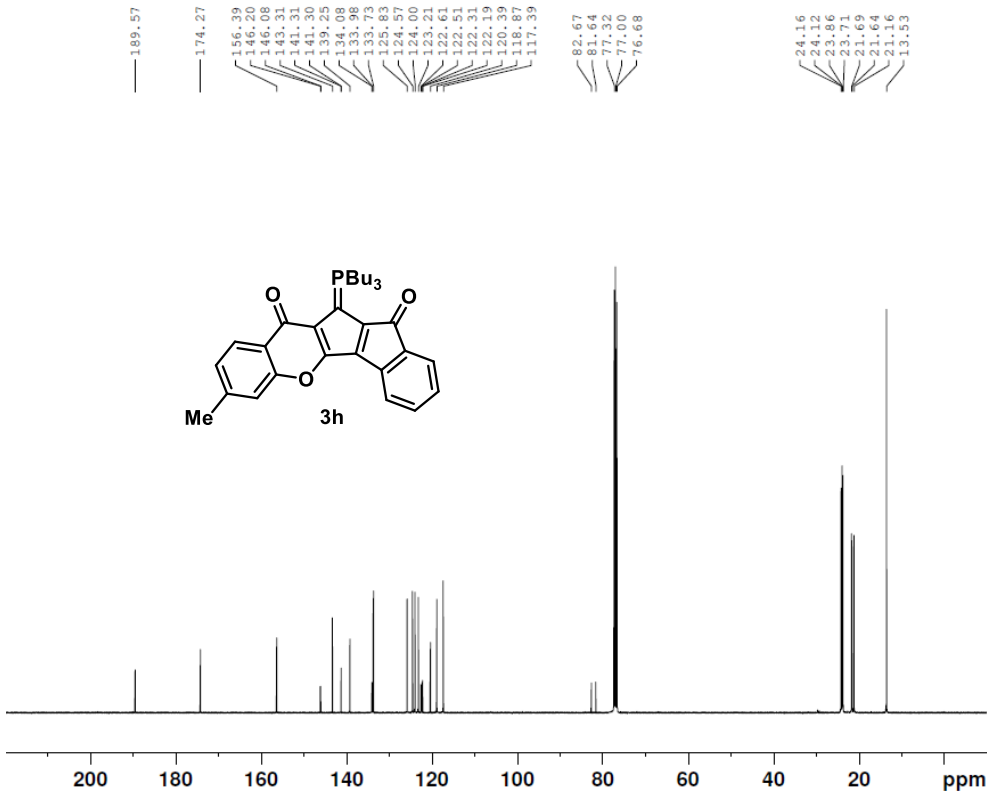

Current Data Parameters  
NAME DP-1219  
EXPNO 2  
PROCNO 1

F2 - Acquisition Parameters  
Date\_ 20240415  
Time 21.59  
INSTRUM spect  
PROBHD 5 mm BBO BB-1H  
PULPROG zgpg30  
TD 32768  
SOLVENT CDCl3  
NS 15844  
DS 0  
SWH 24038.461 Hz  
FIDRES 0.733596 Hz  
AQ 0.6815744 sec  
RG 4096  
DW 20.800 usec  
DE 6.50 usec  
TE 296.1 K  
D1 2.00000000 sec  
D11 0.03000000 sec  
TD0 1

===== CHANNEL f1 =====  
NUC1 13C  
P1 10.00 usec  
PL1 4.20 dB  
SFO1 100.6233325 MHz

===== CHANNEL f2 =====  
CPDPRG[2] waltz16  
NUC2 1H  
PCPD2 90.00 usec  
PL2 10.20 dB  
PL12 26.00 dB  
PL13 29.00 dB  
SFO2 400.1316005 MHz

F2 - Processing parameters  
SI 32768  
SF 100.6127738 MHz  
WDW EM  
SSB 0  
LB 1.00 Hz  
GB 0  
PC 1.00

<sup>13</sup>P NMR spectrum of compound 3h (CDCl<sub>3</sub>, 162 MHz)

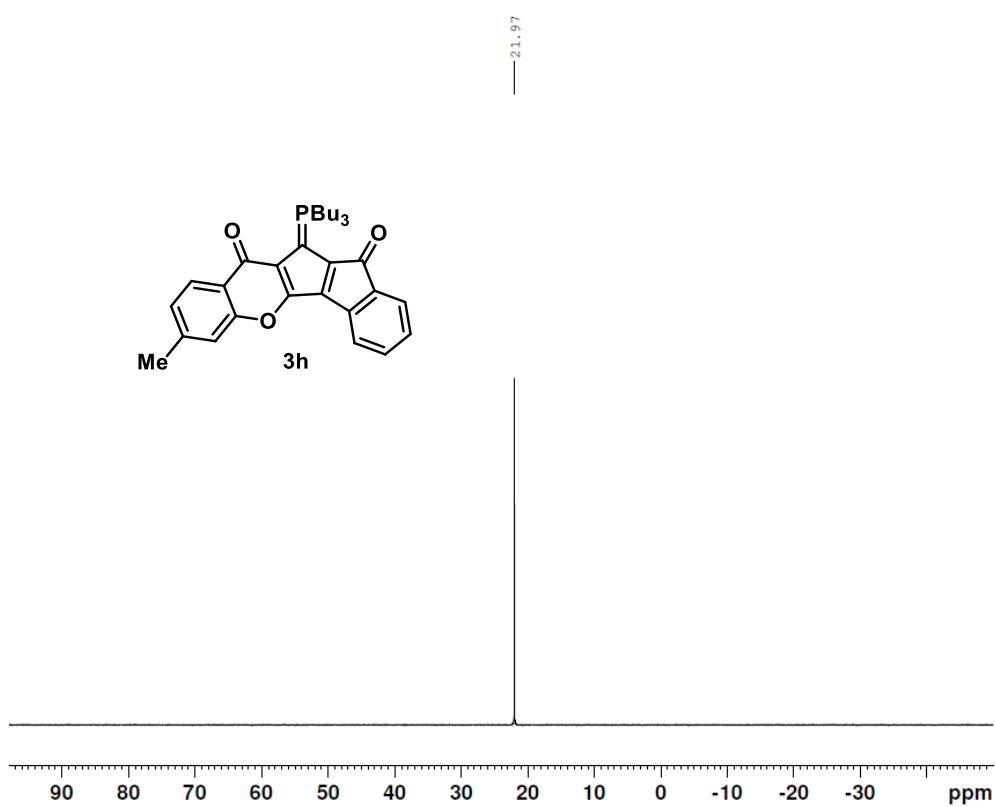

Current Data Parameters  
NAME DP-1255(3f)  
EXPNO 1  
PROCNO 1

F2 - Acquisition Parameters  
Date\_ 20240424  
Time 15.30  
INSTRUM spect  
PROBHD 5 mm PABBO BB/  
PULPROG zgpg30  
TD 65536  
SOLVENT CDCl3  
NS 8  
DS 4  
SWH 49019.609 Hz  
FIDRES 0.747980 Hz  
AQ 0.6684672 sec  
RG 198.09  
DW 10.200 usec  
DE 6.50 usec  
TE 298.8 K  
D1 2.00000000 sec  
D11 0.03000000 sec  
TD0 1

===== CHANNEL f1 =====  
SFO1 161.9836917 MHz  
NUC1 31P  
P1 15.00 usec  
PLW1 13.19999981 W

===== CHANNEL f2 =====  
SFO2 400.1316005 MHz  
NUC2 1H  
CPDPRG[2] waltz16  
PCPD2 90.00 usec  
PLW2 12.50000000 W  
PLW12 0.34722000 W  
PLW13 0.28125000 W

F2 - Processing parameters  
SI 32768  
SF 161.9755930 MHz  
WDW EM  
SSB 0  
LB 2.00 Hz  
GB 0  
PC 1.40

<sup>1</sup>H NMR spectrum of compound 3i (CDCl<sub>3</sub>, 400 MHz)

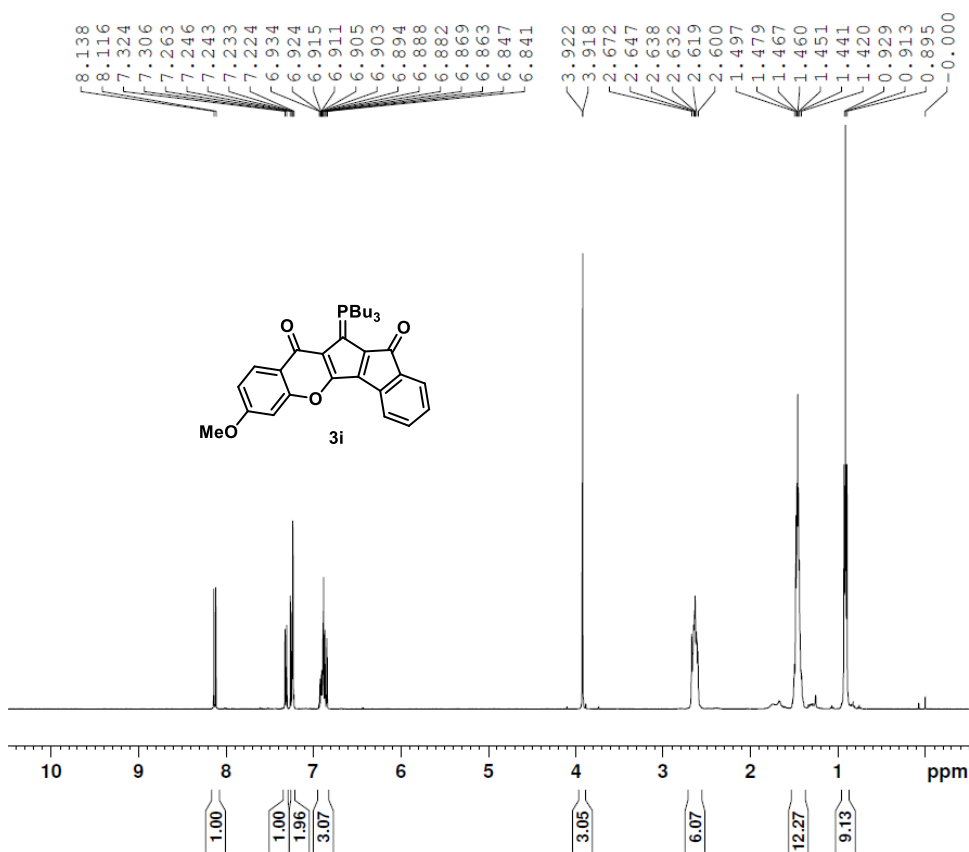

Current Data Parameters  
NAME DP-1296(3f)  
EXPNO 12  
PROCNO 1

F2 - Acquisition Parameters  
Date\_ 20240604  
Time 23.51  
INSTRUM spect  
PROBHD 5 mm PABBO BB/  
PULPROG zg30  
TD 32768  
SOLVENT CDCl3  
NS 16  
DS 0  
SWH 7211.539 Hz  
FIDRES 0.220079 Hz  
AQ 2.2719147 sec  
RG 89.08  
DW 69.333 usec  
DE 10.06 usec  
TE 298.0 K  
D1 2.00000000 sec  
TD0 1

===== CHANNEL f1 =====  
SFO1 400.1324008 MHz  
NUC1 1H  
P1 15.00 usec  
PLW1 13.50000000 W

F2 - Processing parameters  
SI 16384  
SF 400.1300085 MHz  
WDW EM  
SSB 0  
LB 0 Hz  
GB 0  
PC 1.00

<sup>13</sup>C NMR spectrum of compound 3i (CDCl<sub>3</sub>, 100 MHz)

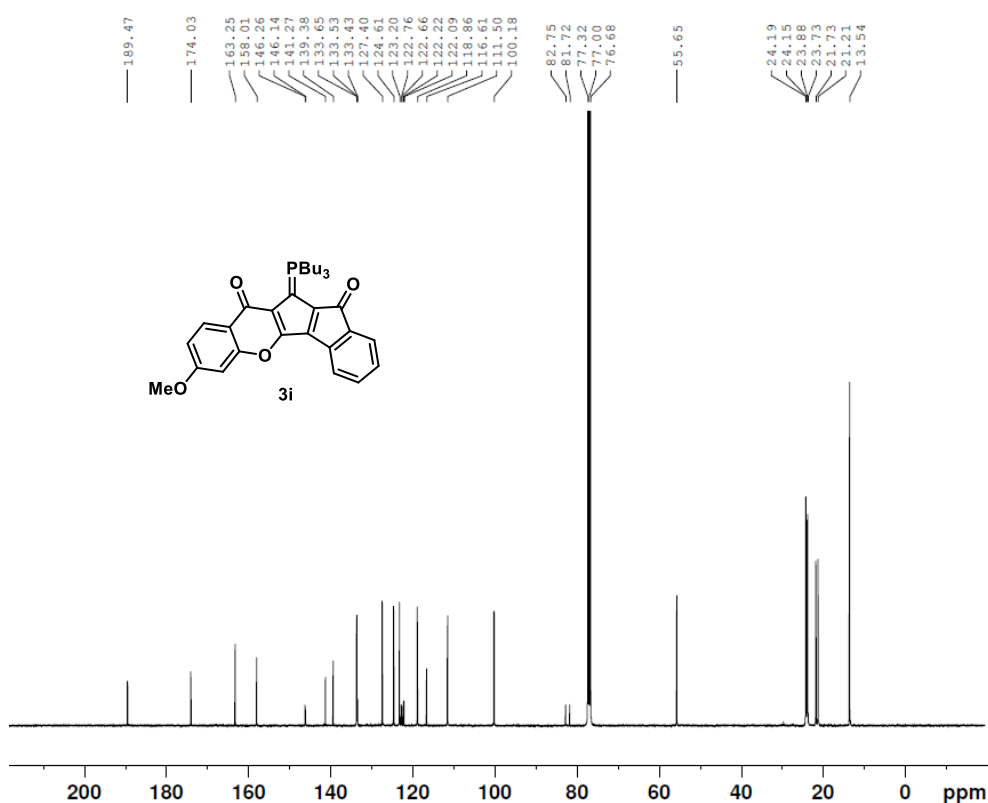

Current Data Parameters  
NAME DP-1296(3f)  
EXPNO 13  
PROCNO 1

F2 - Acquisition Parameters  
Date\_ 20240604  
Time 23.55  
INSTRUM spect  
PROBHD 5 mm PABBO BB/  
PULPROG zgpg30  
TD 32768  
SOLVENT CDCl3  
NS 12289  
DS 0  
SWH 24038.461 Hz  
FIDRES 0.733596 Hz  
AQ 0.6815744 sec  
RG 198.09  
DW 20.800 usec  
DE 6.50 usec  
TE 298.5 K  
D1 2.00000000 sec  
D11 0.03000000 sec  
TD0 1

==== CHANNEL f1 =====  
SF01 100.6228298 MHz  
NUC1 13C  
P1 10.00 usec  
PLW1 49.50000000 W

==== CHANNEL f2 =====  
SF02 400.1316005 MHz  
NUC2 1H  
CPDPRG[2] waltz16  
PCPD2 90.00 usec  
PLW2 12.50000000 W  
PLW12 0.34722000 W  
PLW13 0.28125000 W

F2 - Processing parameters  
SI 32768  
SF 100.6127711 MHz  
WDW EM  
SSB 0  
LB 2.00 Hz  
GB 0  
PC 1.00

<sup>31</sup>P NMR spectrum of compound 3i (CDCl<sub>3</sub>, 162 MHz)

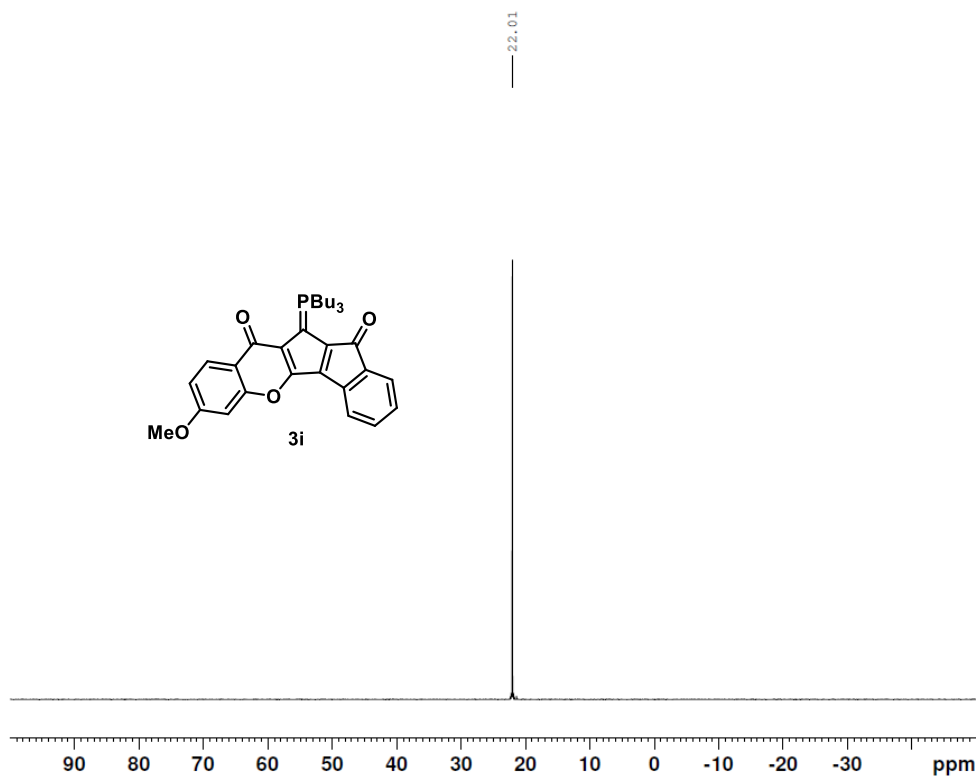

Current Data Parameters  
NAME DP-1296(3f)  
EXPNO 9  
PROCNO 1

F2 - Acquisition Parameters  
Date\_ 20240604  
Time 18.16  
INSTRUM spect  
PROBHD 5 mm PABBO BB/  
PULPROG zgpg30  
TD 65536  
SOLVENT CDCl3  
NS 5  
DS 4  
SWH 49019.609 Hz  
FIDRES 0.747980 Hz  
AQ 0.6684672 sec  
RG 198.09  
DW 10.200 usec  
DE 6.50 usec  
TE 298.0 K  
D1 2.00000000 sec  
D11 0.03000000 sec  
TD0 1

==== CHANNEL f1 =====  
SF01 161.9836917 MHz  
NUC1 31P  
P1 15.00 usec  
PLW1 13.19999981 W

==== CHANNEL f2 =====  
SF02 400.1316005 MHz  
NUC2 1H  
CPDPRG[2] waltz16  
PCPD2 90.00 usec  
PLW2 12.50000000 W  
PLW12 0.34722000 W  
PLW13 0.28125000 W

F2 - Processing parameters  
SI 32768  
SF 161.9755930 MHz  
WDW EM  
SSB 0  
LB 2.00 Hz  
GB 0  
PC 1.40



**<sup>1</sup>H NMR spectrum of compound 3j (CDCl<sub>3</sub>, 400 MHz)**

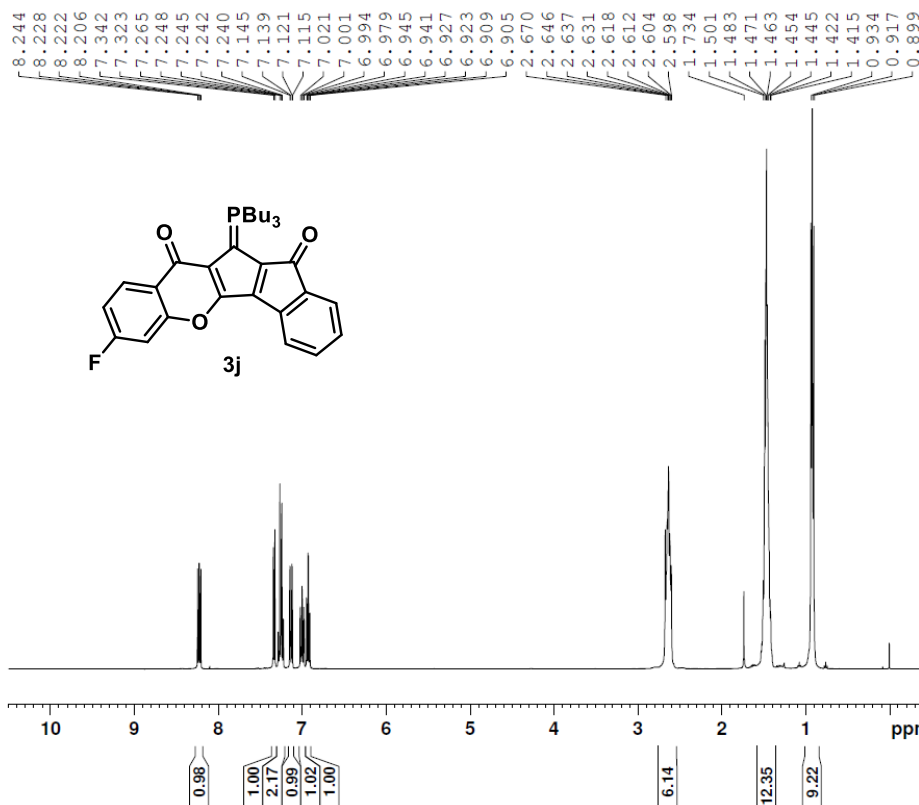

Current Data Parameters  
NAME DP-1170(3f)  
EXPNO 6  
PROCNO 1

F2 - Acquisition Parameters  
Date\_ 20240227  
Time 22.03  
INSTRUM spect  
PROBHD 5 mm PABBO BB/  
PULPROG zg30  
TD 32768  
SOLVENT CDCl3  
NS 16  
DS 0  
SWH 7211.539 Hz  
FIDRES 0.220079 Hz  
AQ 2.2719147 sec  
RG 57.42  
DW 69.333 usec  
DE 10.06 usec  
TE 297.9 K  
D1 2.00000000 sec  
TD0 1

==== CHANNEL f1 =====  
SFO1 400.1324008 MHz  
NUC1 1H  
P1 15.00 usec  
PLW1 13.50000000 W

F2 - Processing parameters  
SI 16384  
SF 400.1300077 MHz  
WDW EM  
SSB 0  
LB 0 Hz  
GB 0  
PC 1.00

**<sup>13</sup>C NMR spectrum of compound 3j (CDCl<sub>3</sub>, 100 MHz)**

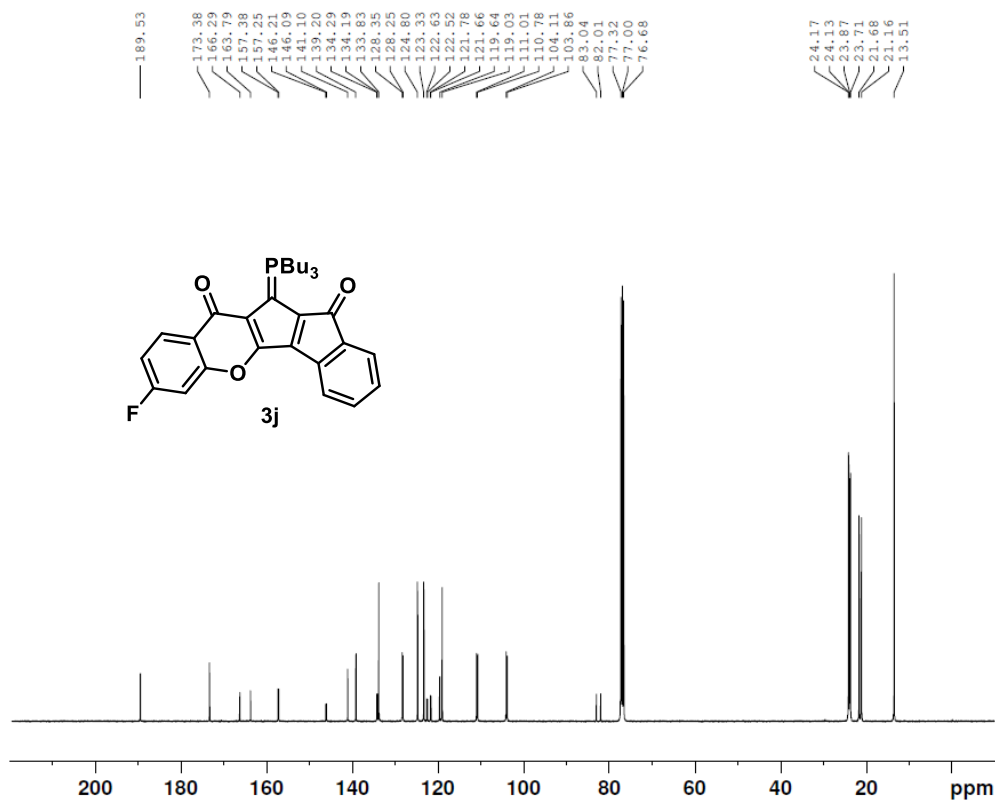

Current Data Parameters  
NAME DP-1170(3f)  
EXPNO 7  
PROCNO 1

F2 - Acquisition Parameters  
Date\_ 20240227  
Time 22.05  
INSTRUM spect  
PROBHD 5 mm PABBO BB/  
PULPROG zgpg30  
TD 32768  
SOLVENT CDCl3  
NS 14850  
DS 0  
SWH 24038.461 Hz  
FIDRES 0.733596 Hz  
AQ 0.6815744 sec  
RG 198.09  
DW 20.800 usec  
DE 6.50 usec  
TE 298.1 K  
D1 2.00000000 sec  
D11 0.03000000 sec  
TD0 1

==== CHANNEL f1 =====  
SFO1 100.6228298 MHz  
NUC1 13C  
P1 10.00 usec  
PLW1 49.50000000 W

==== CHANNEL f2 =====  
SFO2 400.1316005 MHz  
NUC2 1H  
PCPD2 waltz16  
PCPD2 90.00 usec  
PLW2 12.50000000 W  
PLW12 0.34722000 W  
PLW13 0.28125000 W

F2 - Processing parameters  
SI 32768  
SF 100.6127715 MHz  
WDW EM  
SSB 0  
LB 2.00 Hz  
GB 0  
PC 1.00

<sup>31</sup>P NMR spectrum of compound 3j (CDCl<sub>3</sub>, 162 MHz)

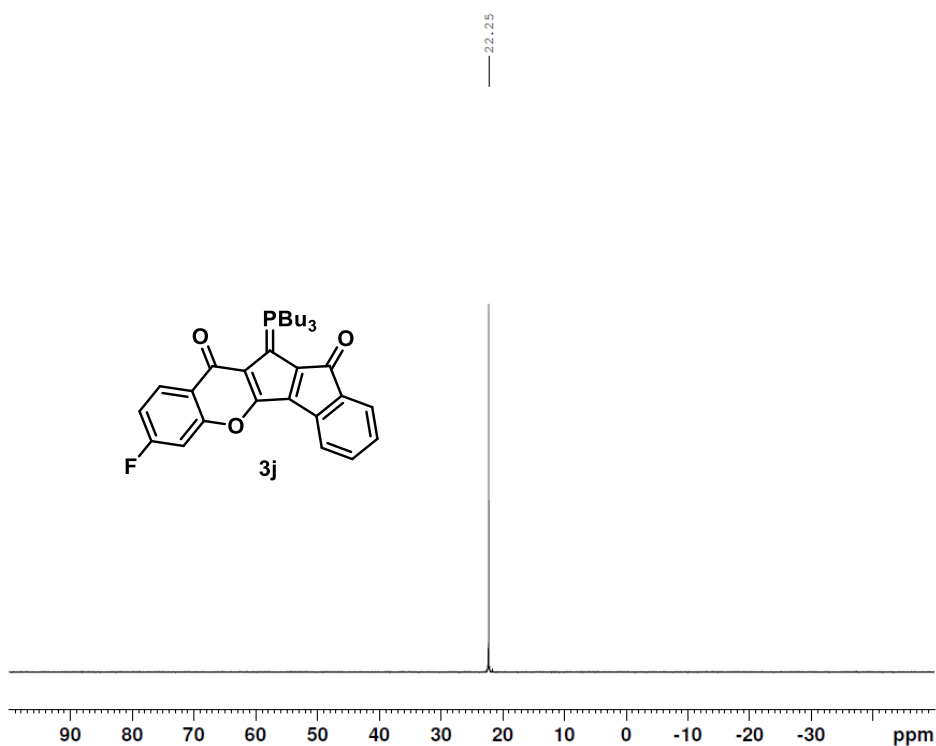

```
Current Data Parameters
NAME      DP-1170(3f)
EXPNO     1
PROCNO    1

F2 - Acquisition Parameters
Date_     20240226
Time      21.17
INSTRUM   spect
PROBHD    5 mm PABBO BB/
PULPROG   zgpg30
TD         65536
SOLVENT   CDCl3
NS         9
DS         4
SWH       49019.609 Hz
FIDRES    0.747980 Hz
AQ         0.6684672 sec
RG         198.09
DW         10.200 usec
DE         6.50 usec
TE         297.6 K
D1         2.00000000 sec
D11        0.03000000 sec
TD0        1

===== CHANNEL f1 =====
SFO1      161.9836917 MHz
NUC1       31P
P1         15.00 usec
PLW1      13.19999981 W

===== CHANNEL f2 =====
SFO2      400.1316005 MHz
NUC2       1H
PCPD2     waltz16
PCPD2     90.00 usec
PLW2      12.50000000 W
PLW12     0.34722000 W
PLW13     0.28125000 W

F2 - Processing parameters
SI         32768
SF         161.9755930 MHz
WDW        EM
SSB         0
LB         2.00 Hz
GB         0
PC         1.40
```

<sup>19</sup>F NMR spectrum of compound 3j (CDCl<sub>3</sub>, 376 MHz)

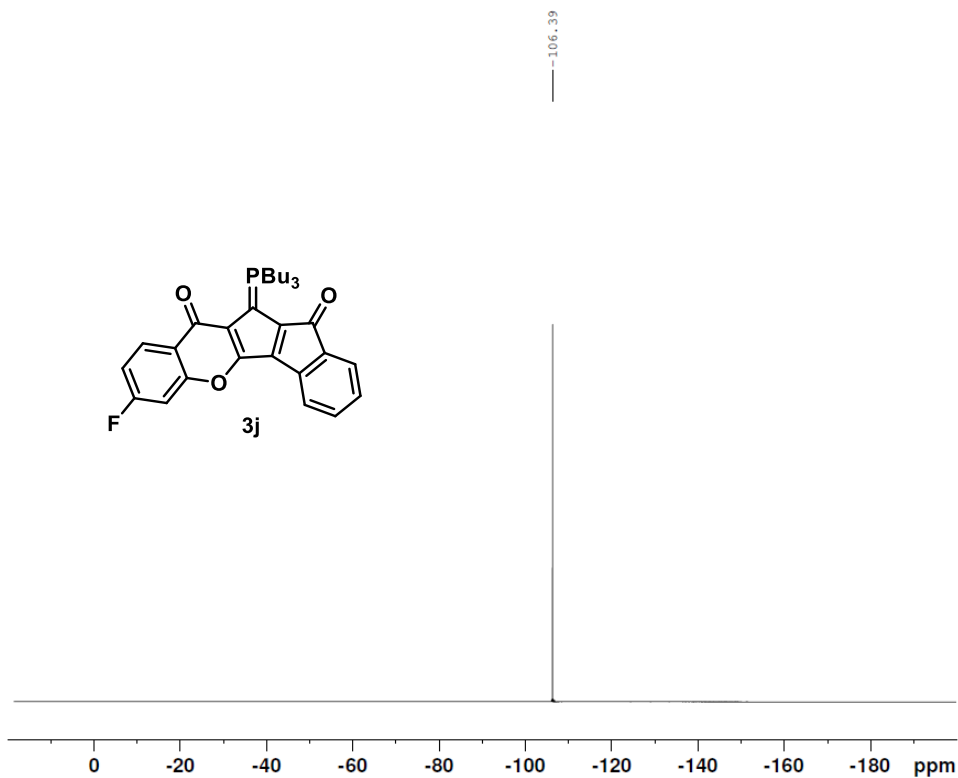

```
Current Data Parameters
NAME      DP-1170(3f)
EXPNO     8
PROCNO    1

F2 - Acquisition Parameters
Date_     20240311
Time      11.31
INSTRUM   spect
PROBHD    5 mm PABBO BB/
PULPROG   zgig
TD         131072
SOLVENT   CDCl3
NS         16
DS         0
SWH       89285.711 Hz
FIDRES    0.681196 Hz
AQ         0.7340032 sec
RG         198.09
DW         5.600 usec
DE         6.50 usec
TE         298.3 K
D1         1.00000000 sec
D11        0.03000000 sec
TD0        1

===== CHANNEL f1 =====
SFO1      376.4607168 MHz
NUC1      19F
P1         15.00 usec
PLW1      16.50000000 W

===== CHANNEL f2 =====
SFO2      400.1316005 MHz
NUC2       1H
PCPD2     waltz16
PCPD2     90.00 usec
PLW2      12.50000000 W
PLW12     0.34722000 W

F2 - Processing parameters
SI         65536
SF         376.4983662 MHz
WDW        EM
SSB         0
LB         1.00 Hz
GB         0
PC         1.00
```

<sup>1</sup>H NMR spectrum of compound 3k (CDCl<sub>3</sub>, 400 MHz)

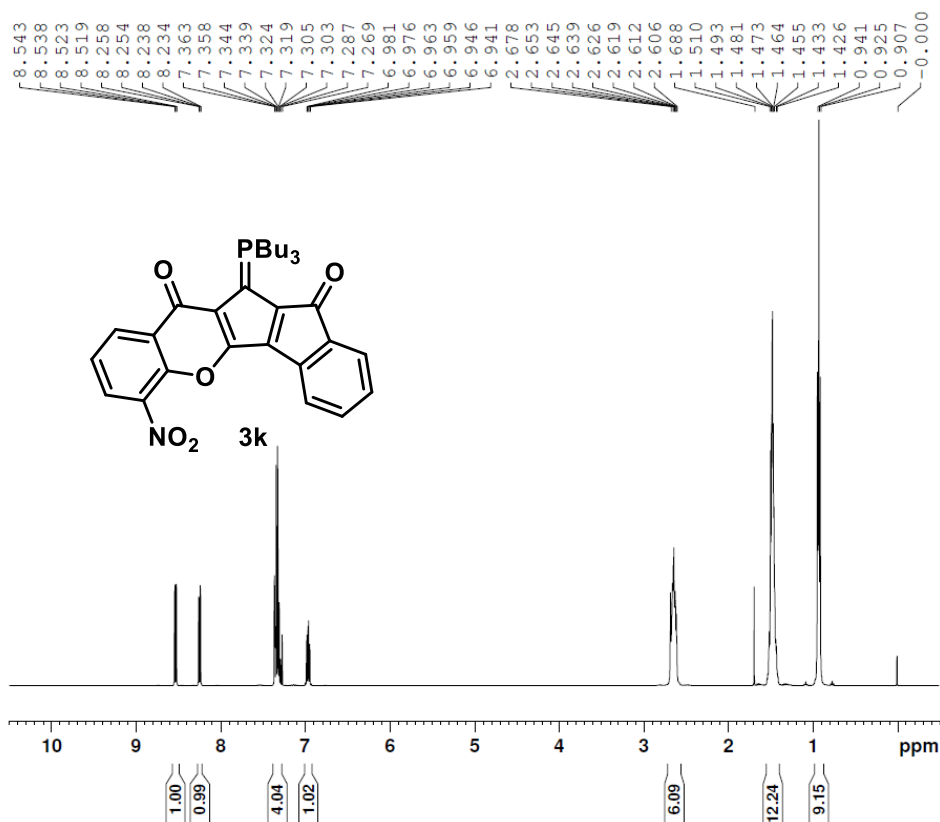

Current Data Parameters  
NAME DP-1182(3f)  
EXPNO 12  
PROCNO 1

F2 - Acquisition Parameters  
Date\_ 20240309  
Time 18.28  
INSTRUM spect  
PROBHD 5 mm PABBO BB/  
PULPROG zg30  
TD 32768  
SOLVENT CDCl3  
NS 16  
DS 0  
SWH 7211.539 Hz  
FIDRES 0.220079 Hz  
AQ 2.2719147 sec  
RG 63.58  
DW 69.333 usec  
DE 10.06 usec  
TE 298.1 K  
D1 2.0000000 sec  
TD0 1

===== CHANNEL f1 =====  
SFO1 400.1324008 MHz  
NUC1 1H  
P1 15.00 usec  
PLW1 13.50000000 W

F2 - Processing parameters  
SI 16384  
SF 400.1300058 MHz  
WDW EM  
SSB 0  
LB 0 Hz  
GB 0  
PC 1.00

<sup>13</sup>C NMR spectrum of compound 3k (CDCl<sub>3</sub>, 100 MHz)

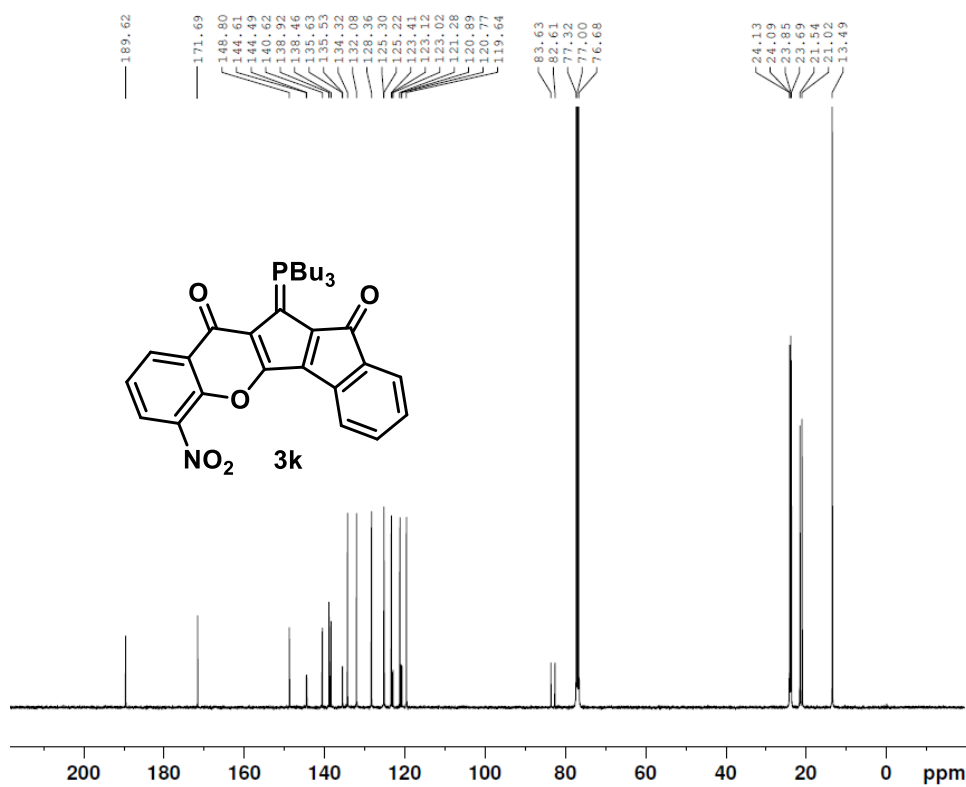

Current Data Parameters  
NAME DP-1182(3f)  
EXPNO 11  
PROCNO 1

F2 - Acquisition Parameters  
Date\_ 20240309  
Time 18.31  
INSTRUM spect  
PROBHD 5 mm PABBO BB/  
PULPROG zgpg30  
TD 32768  
SOLVENT CDCl3  
NS 5535  
DS 0  
SWH 24038.461 Hz  
FIDRES 0.733596 Hz  
AQ 0.6815744 sec  
RG 198.09  
DW 20.800 usec  
DE 6.50 usec  
TE 298.2 K  
D1 2.0000000 sec  
D11 0.03000000 sec  
TD0 1

===== CHANNEL f1 =====  
SFO1 100.6228298 MHz  
NUC1 13C  
P1 10.00 usec  
PLW1 49.50000000 W

===== CHANNEL f2 =====  
SFO2 400.1316005 MHz  
NUC2 1H  
CPDPRG[2] waltz16  
PCPD2 90.00 usec  
PLW2 12.50000000 W  
PLW12 0.34722000 W  
PLW13 0.28125000 W

F2 - Processing parameters  
SI 32768  
SF 100.6127718 MHz  
WDW EM  
SSB 0  
LB 2.00 Hz  
GB 0  
PC 1.00

<sup>31</sup>P NMR spectrum of compound **3k** (CDCl<sub>3</sub>, 162 MHz)

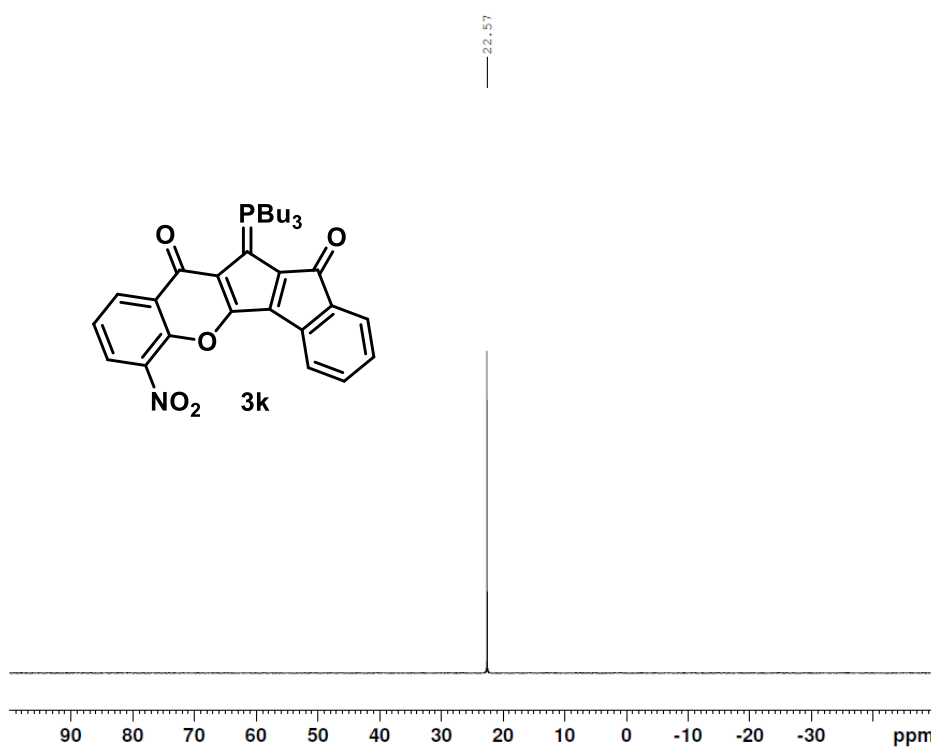

Current Data Parameters  
NAME DP-1182(3F)  
EXPNO 9  
PROCNO 1

F2 - Acquisition Parameters  
Date\_ 20240309  
Time 14.30  
INSTRUM spect  
PROBHD 5 mm PABBO BB/  
PULPROG zgpg30  
TD 65536  
SOLVENT CDCl<sub>3</sub>  
NS 16  
DS 4  
SWH 49019.609 Hz  
FIDRES 0.747980 Hz  
AQ 0.6684672 sec  
RG 198.09  
DW 10.200 usec  
DE 6.50 usec  
TE 298.0 K  
D1 2.0000000 sec  
D11 0.0300000 sec  
TD0 1

===== CHANNEL f1 =====  
SFO1 161.9836917 MHz  
NUC1 31P  
P1 15.00 usec  
PLW1 13.19999981 W

===== CHANNEL f2 =====  
SFO2 400.1316005 MHz  
NUC2 1H  
CPDPRG[2] waltz16  
PCPD2 90.00 usec  
PLW2 12.5000000 W  
PLW12 0.3472200 W  
PLW13 0.28125000 W

F2 - Processing parameters  
SI 32768  
SF 161.9755930 MHz  
WDW EM  
SSB 0  
LB 2.00 Hz  
GB 0  
PC 1.40

<sup>1</sup>H NMR spectrum of compound **3l** (CDCl<sub>3</sub>, 400 MHz)

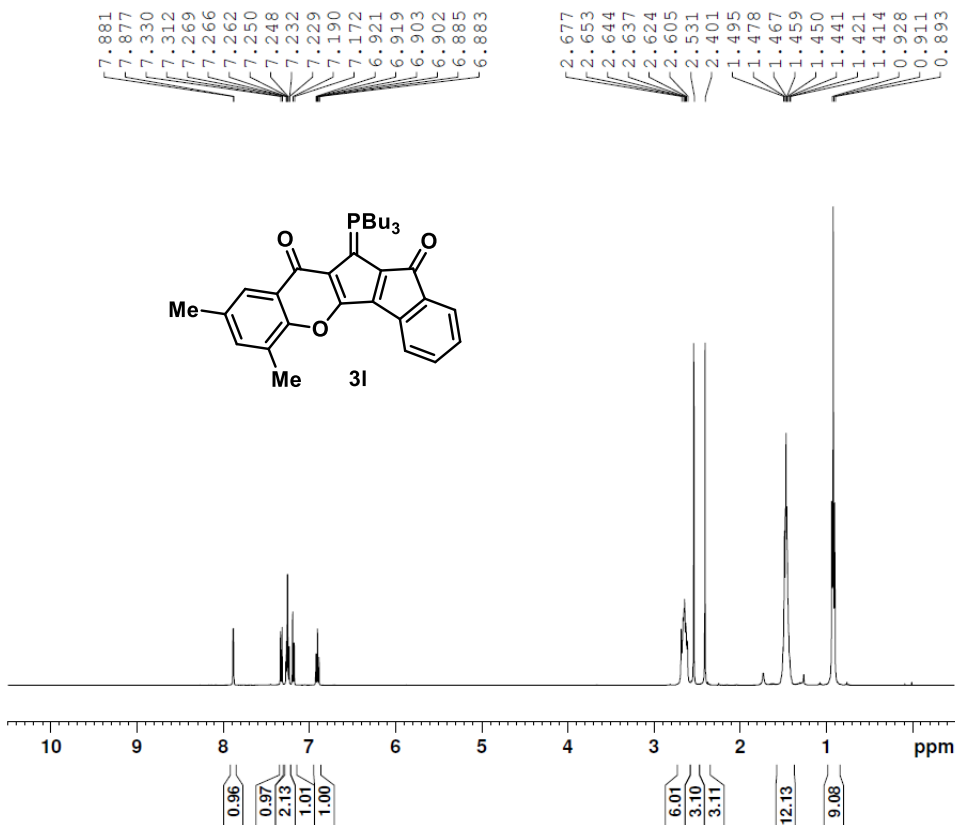

Current Data Parameters  
NAME DP-1211(3F)  
EXPNO 12  
PROCNO 1

F2 - Acquisition Parameters  
Date\_ 20240403  
Time 22.07  
INSTRUM spect  
PROBHD 5 mm PABBO BB/  
PULPROG zg30  
TD 32768  
SOLVENT CDCl<sub>3</sub>  
NS 16  
DS 0  
SWH 7211.539 Hz  
FIDRES 0.220079 Hz  
AQ 2.2719147 sec  
RG 51.8  
DW 69.333 usec  
DE 10.06 usec  
TE 298.2 K  
D1 2.0000000 sec  
TD0 1

===== CHANNEL f1 =====  
SFO1 400.1324008 MHz  
NUC1 1H  
P1 15.00 usec  
PLW1 13.50000000 W

F2 - Processing parameters  
SI 16384  
SF 400.1300088 MHz  
WDW EM  
SSB 0  
LB 0 Hz  
GB 0  
PC 1.00

<sup>13</sup>C NMR spectrum of compound **31** (CDCl<sub>3</sub>, 100 MHz)

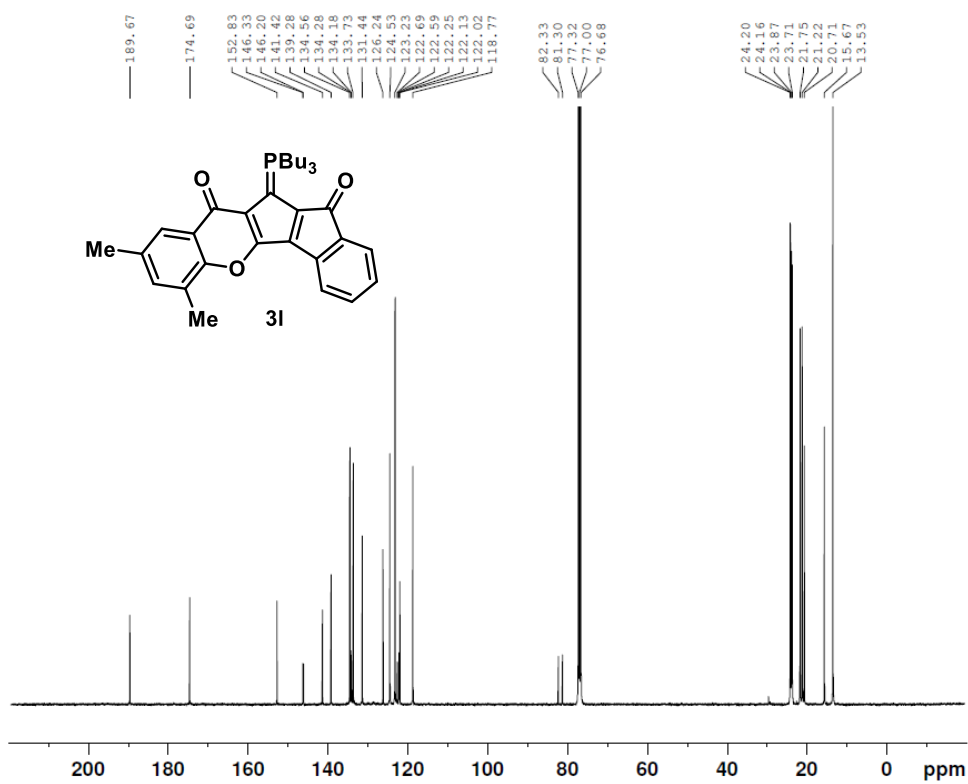

Current Data Parameters  
NAME DP-1211 (3F)  
EXPNO 13  
PROCNO 1

F2 - Acquisition Parameters  
Date\_ 20240403  
Time 22.09  
INSTRUM spect  
PROBHD 5 mm PABBO BB/  
PULPROG zgpg30  
TD 32768  
SOLVENT CDCl3  
NS 13692  
DS 0  
SWH 24038.461 Hz  
FIDRES 0.733596 Hz  
AQ 0.6815744 sec  
RG 198.09  
DW 20.800 usec  
DE 6.50 usec  
TE 298.2 K  
D1 2.00000000 sec  
D11 0.03000000 sec  
TD0 1

==== CHANNEL f1 =====  
SFO1 100.6228298 MHz  
NUC1 13C  
P1 10.00 usec  
PLW1 49.50000000 W

==== CHANNEL f2 =====  
SFO2 400.1316005 MHz  
NUC2 1H  
CPDPRG[2] waltz16  
PCPD2 90.00 usec  
PLW2 12.50000000 W  
PLW12 0.34722000 W  
PLW13 0.28125000 W

F2 - Processing parameters  
SI 32768  
SF 100.6127721 MHz  
WDW EM  
SSB 0  
LB 2.00 Hz  
GB 0  
PC 1.00

<sup>31</sup>P NMR spectrum of compound **31** (CDCl<sub>3</sub>, 162 MHz)

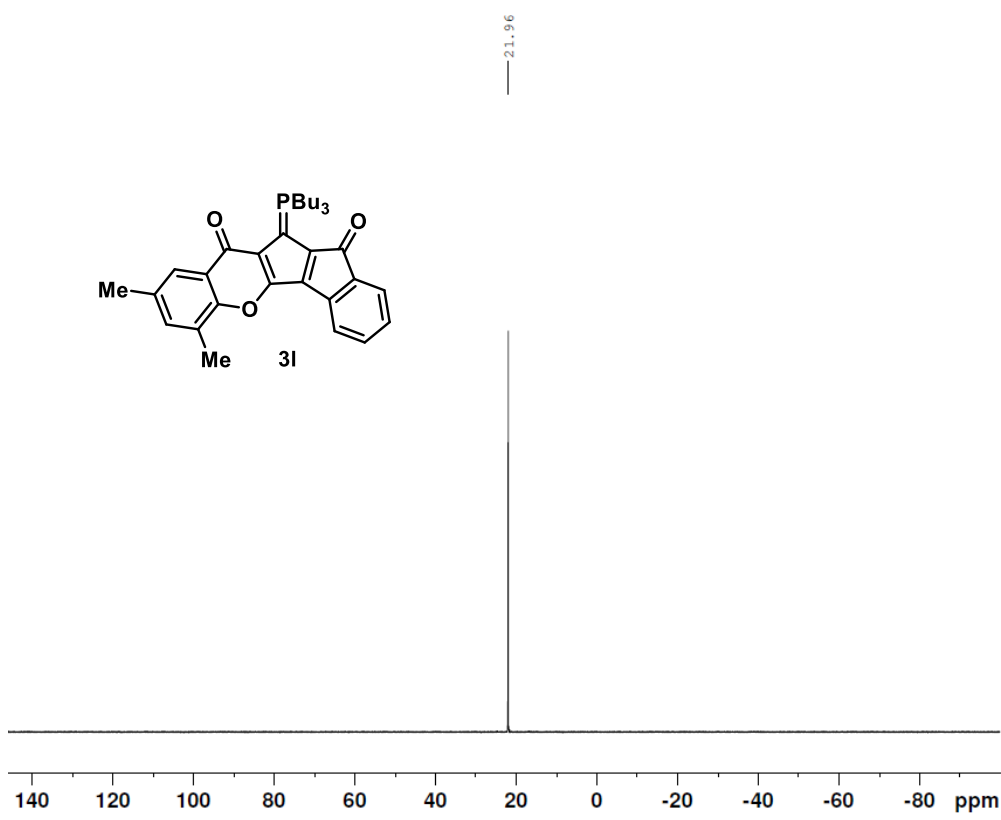

Current Data Parameters  
NAME DP-1211 (3F)  
EXPNO 9  
PROCNO 1

F2 - Acquisition Parameters  
Date\_ 20240401  
Time 20.07  
INSTRUM spect  
PROBHD 5 mm PABBO BB/  
PULPROG zgpg30  
TD 65536  
SOLVENT CDCl3  
NS 5  
DS 4  
SWH 49019.609 Hz  
FIDRES 0.747980 Hz  
AQ 0.6684672 sec  
RG 198.09  
DW 10.200 usec  
DE 6.50 usec  
TE 298.4 K  
D1 2.00000000 sec  
D11 0.03000000 sec  
TD0 1

==== CHANNEL f1 =====  
SFO1 161.9836917 MHz  
NUC1 31P  
P1 15.00 usec  
PLW1 13.19999981 W

==== CHANNEL f2 =====  
SFO2 400.1316005 MHz  
NUC2 1H  
CPDPRG[2] waltz16  
PCPD2 90.00 usec  
PLW2 12.50000000 W  
PLW12 0.34722000 W  
PLW13 0.28125000 W

F2 - Processing parameters  
SI 32768  
SF 161.9755930 MHz  
WDW EM  
SSB 0  
LB 2.00 Hz  
GB 0  
PC 1.40

### <sup>1</sup>H NMR spectrum of compound **3m** (CDCl<sub>3</sub>, 400 MHz)

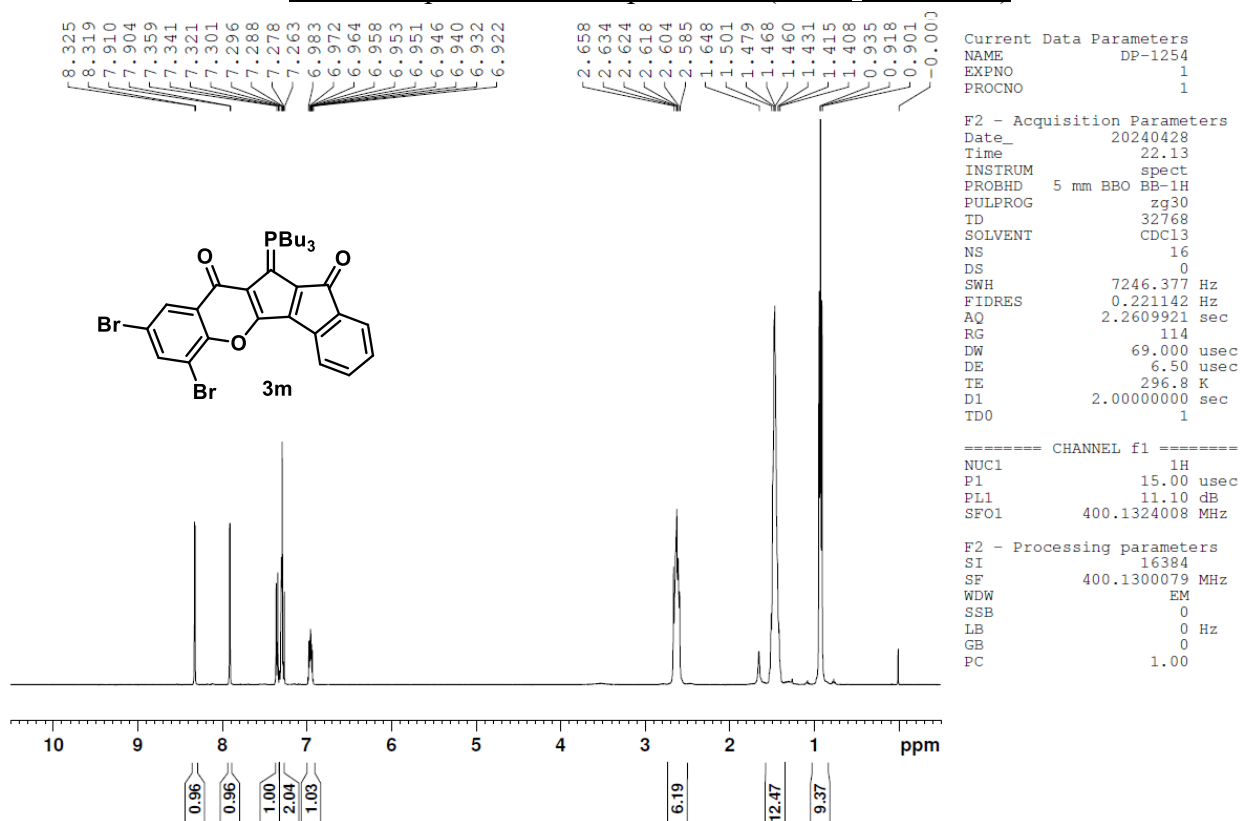

### <sup>13</sup>C NMR spectrum of compound **3m** (CDCl<sub>3</sub>, 100 MHz)

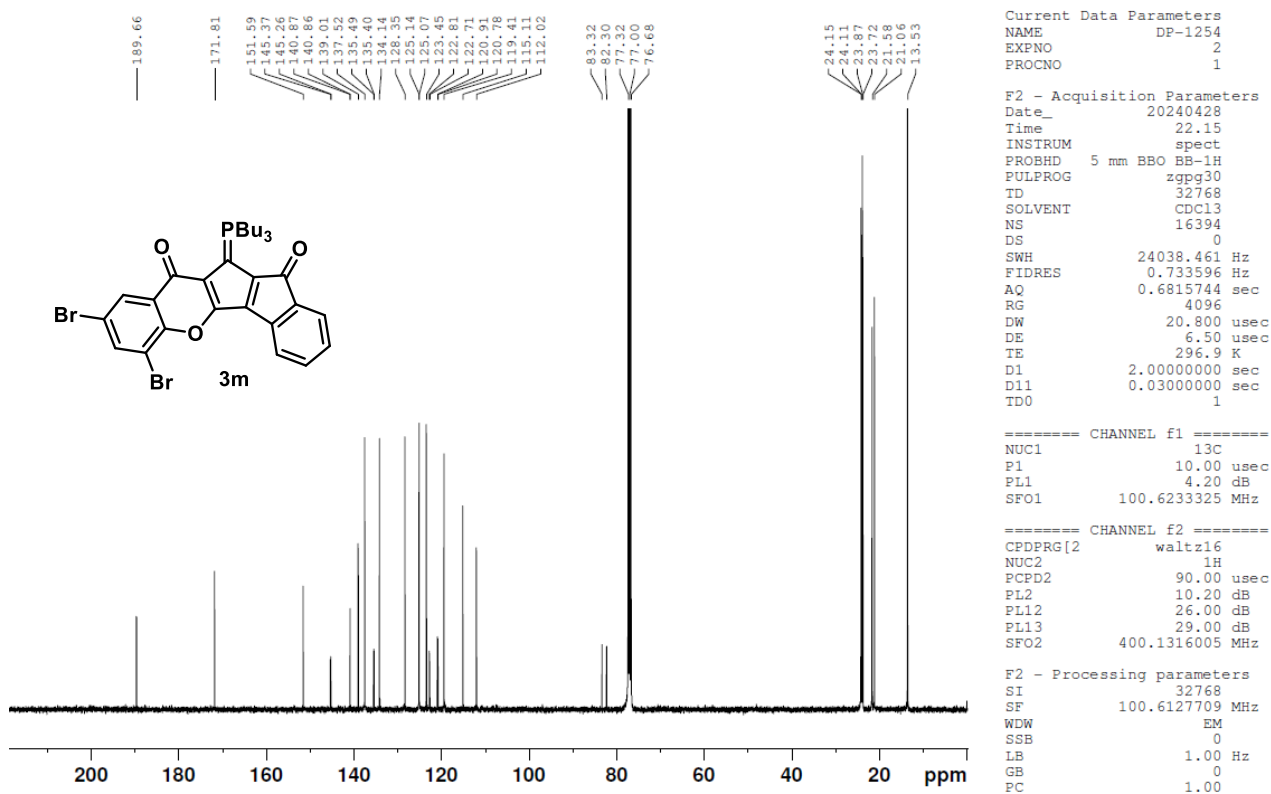

<sup>31</sup>P NMR spectrum of compound **3m** (CDCl<sub>3</sub>, 162 MHz)

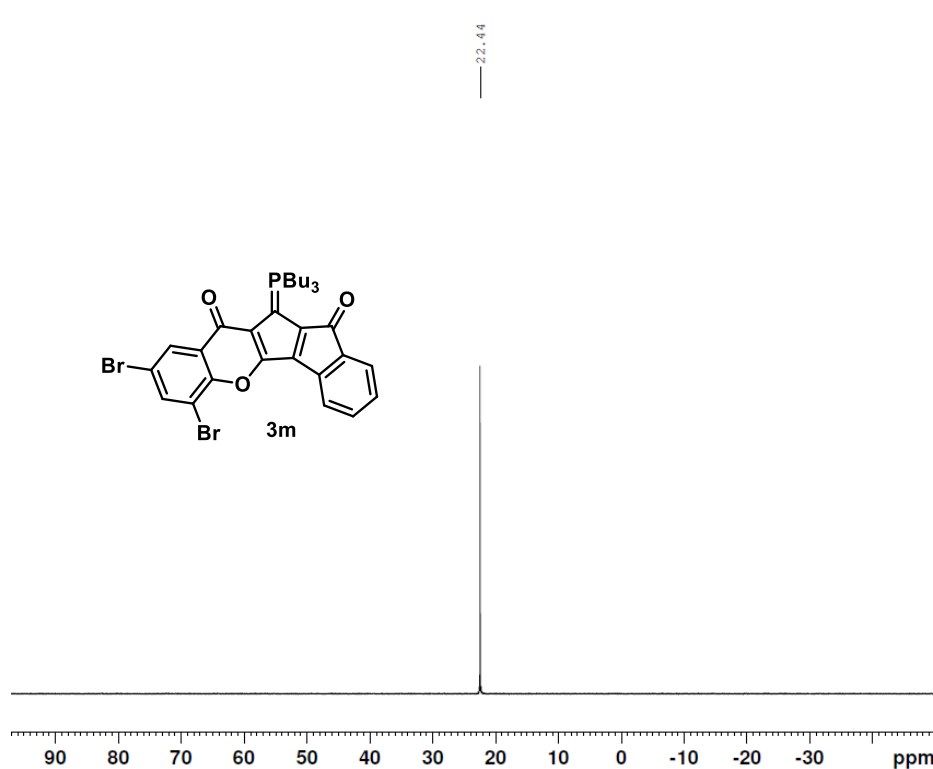

```

Current Data Parameters
NAME      DP-1254 (3F)
EXPNO    1
PROCNO   1

F2 - Acquisition Parameters
Date_    20240424
Time     15.26
INSTRUM  spect
PROBHD   5 mm PABBO BB/
PULPROG  zgpg30
TD       65536
SOLVENT  CDCl3
NS       5
DS       4
SWH      49019.609 Hz
FIDRES   0.747980 Hz
AQ       0.6684672 sec
RG       198.09
DW       10.200 usec
DE       6.50 usec
TE       298.7 K
D1       2.0000000 sec
D11      0.0300000 sec
TD0      1

===== CHANNEL f1 =====
SFO1     161.9836917 MHz
NUC1     31P
P1       15.00 usec
PLW1     13.19999981 W

===== CHANNEL f2 =====
SFO2     400.1316005 MHz
NUC2     1H
CPDPRG[2] waltz16
PCPD2    90.00 usec
PLW2     12.50000000 W
PLW12    0.34722000 W
PLW13    0.28125000 W

F2 - Processing parameters
SI       32768
SF       161.9755930 MHz
WDW      EM
SSB      0
LB       2.00 Hz
GB       0
PC       1.40
    
```

<sup>1</sup>H NMR spectrum of compound **3n** (CDCl<sub>3</sub>, 400 MHz)

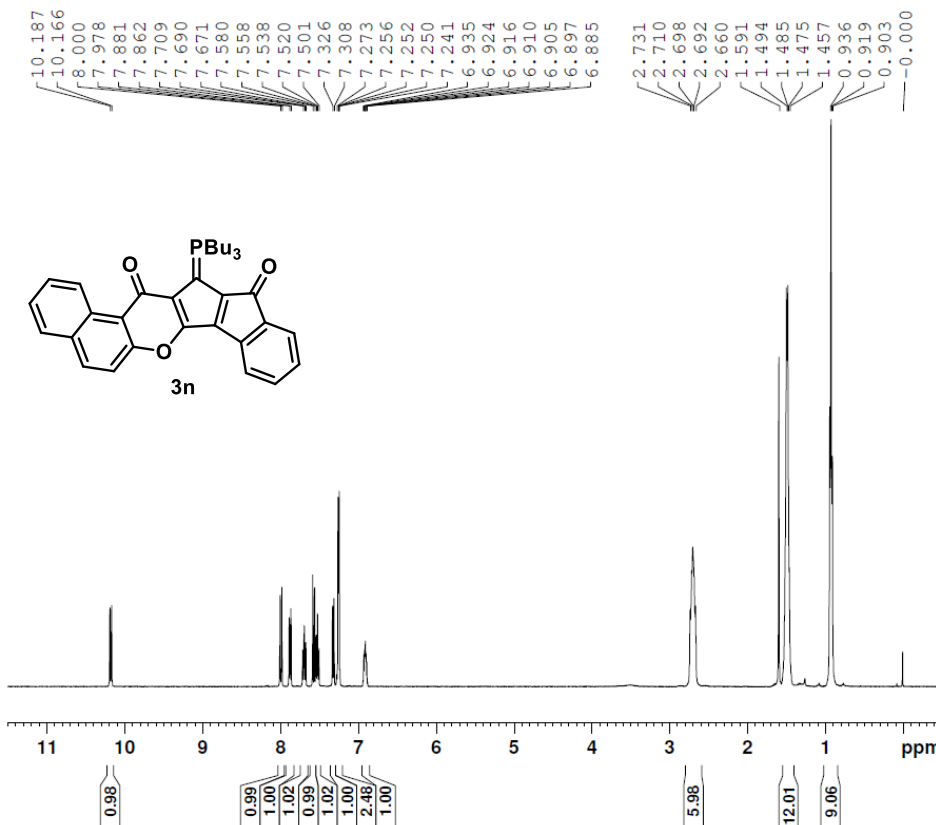

```

Current Data Parameters
NAME      DP-1174 (3F)
EXPNO    1
PROCNO   1

F2 - Acquisition Parameters
Date_    20240305
Time     21.57
INSTRUM  spect
PROBHD   5 mm BBO BB-1H
PULPROG  zg30
TD       32768
SOLVENT  CDCl3
NS       16
DS       0
SWH      7246.377 Hz
FIDRES   0.221142 Hz
AQ       2.2609921 sec
RG       181
DW       69.000 usec
DE       6.50 usec
TE       298.7 K
D1       2.0000000 sec
TD0      1

===== CHANNEL f1 =====
NUC1     1H
P1       15.00 usec
PL1     11.10 dB
SFO1     400.1324008 MHz

F2 - Processing parameters
SI       16384
SF       400.1300106 MHz
WDW      EM
SSB      0
LB       0 Hz
GB       0
PC       1.00
    
```

<sup>13</sup>C NMR spectrum of compound 3n (CDCl<sub>3</sub>, 100 MHz)

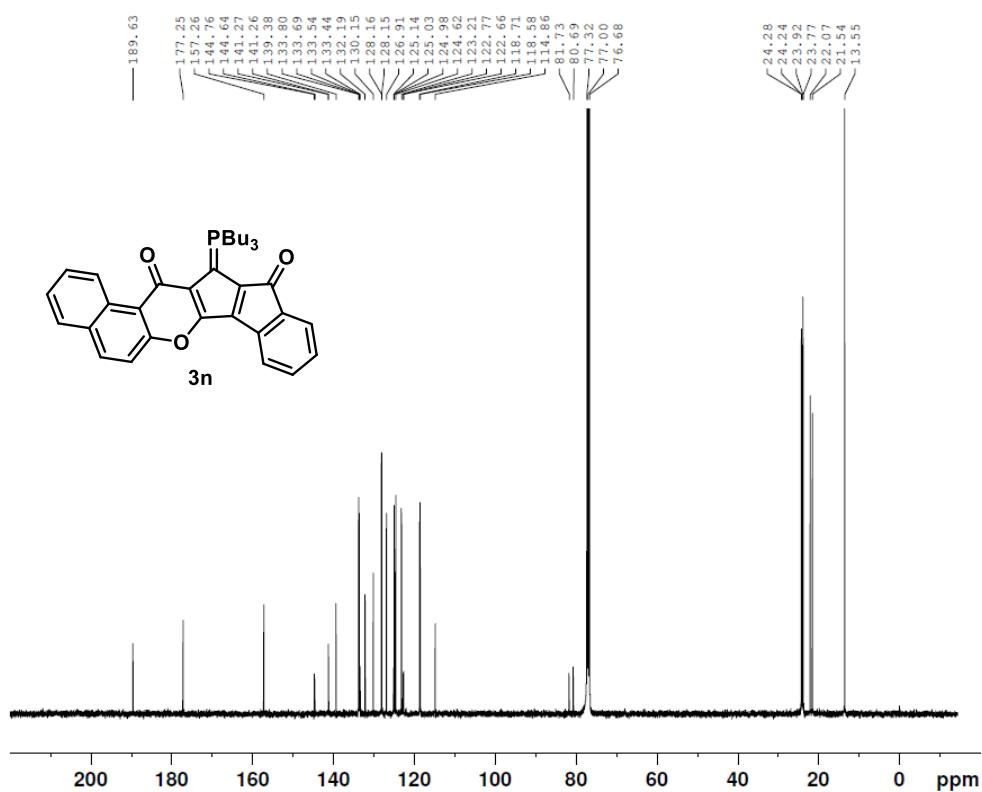

Current Data Parameters  
NAME DP-1174(3f)  
EXPNO 2  
PROCNO 1

F2 - Acquisition Parameters  
Date\_ 20240305  
Time 21.59  
INSTRUM spect  
PROBHD 5 mm BBO BB-1H  
PULPROG zgpg30  
TD 32768  
SOLVENT CDCl3  
NS 17361  
DS 0  
SWH 24038.461 Hz  
FIDRES 0.733596 Hz  
AQ 0.6815744 sec  
RG 4096  
DW 20.800 usec  
DE 6.50 usec  
TE 298.7 K  
D1 2.00000000 sec  
D11 0.03000000 sec  
TD0 1

===== CHANNEL f1 =====  
NUC1 13C  
P1 10.00 usec  
PL1 4.20 dB  
SFO1 100.6233325 MHz

===== CHANNEL f2 =====  
CPDPRG[2] waltz16  
NUC2 1H  
PCPD2 90.00 usec  
PL2 10.20 dB  
PL12 26.00 dB  
PL13 29.00 dB  
SFO2 400.1316005 MHz

F2 - Processing parameters  
SI 32768  
SF 100.6127704 MHz  
WDW EM  
SSB 0  
LB 1.00 Hz  
GB 0  
PC 1.00

<sup>31</sup>P NMR spectrum of compound 3n (CDCl<sub>3</sub>, 162 MHz)

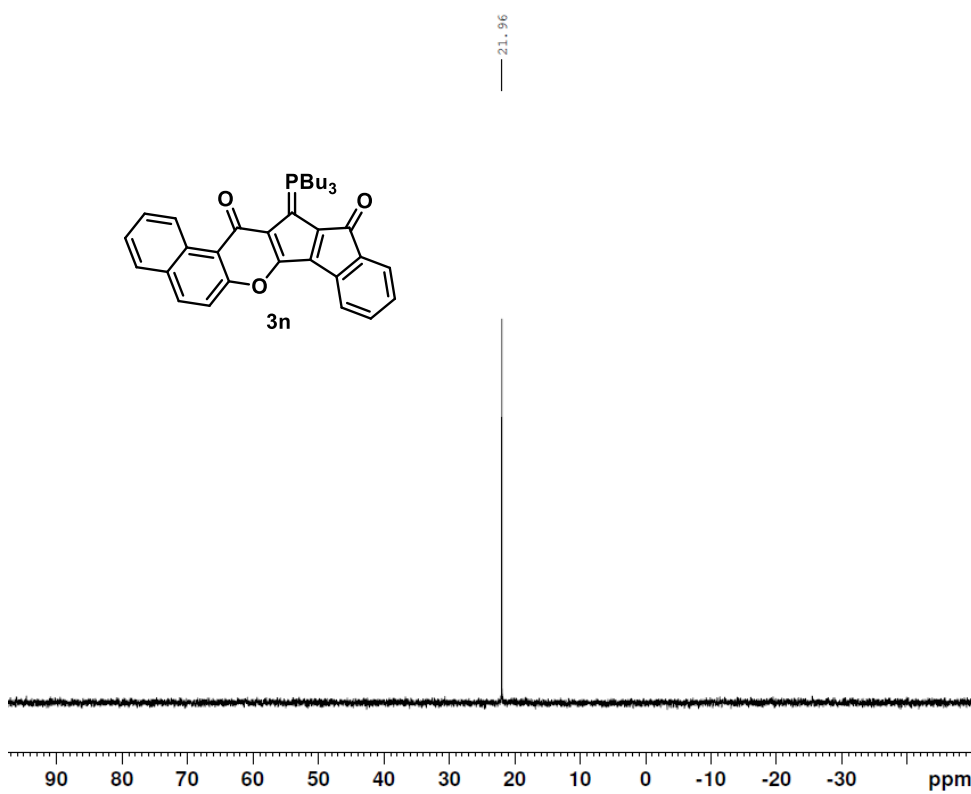

Current Data Parameters  
NAME DP-1174(3f)  
EXPNO 3  
PROCNO 1

F2 - Acquisition Parameters  
Date\_ 20240229  
Time 16.13  
INSTRUM spect  
PROBHD 5 mm PABBO BB/  
PULPROG zgpg30  
TD 65536  
SOLVENT CDCl3  
NS 14  
DS 4  
SWH 49019.609 Hz  
FIDRES 0.747980 Hz  
AQ 0.6684672 sec  
RG 198.09  
DW 10.200 usec  
DE 6.50 usec  
TE 298.4 K  
D1 2.00000000 sec  
D11 0.03000000 sec  
TD0 1

===== CHANNEL f1 =====  
SFO1 161.9836917 MHz  
NUC1 31P  
P1 15.00 usec  
PLW1 13.19999981 W

===== CHANNEL f2 =====  
SFO2 400.1316005 MHz  
NUC2 1H  
CPDPRG[2] waltz16  
PCPD2 90.00 usec  
PLW2 12.50000000 W  
PLW12 0.34722000 W  
PLW13 0.28125000 W

F2 - Processing parameters  
SI 32768  
SF 161.9755930 MHz  
WDW EM  
SSB 0  
LB 2.00 Hz  
GB 0  
PC 1.40



<sup>1</sup>H NMR spectrum of compound **3o** (CDCl<sub>3</sub>, 400 MHz)

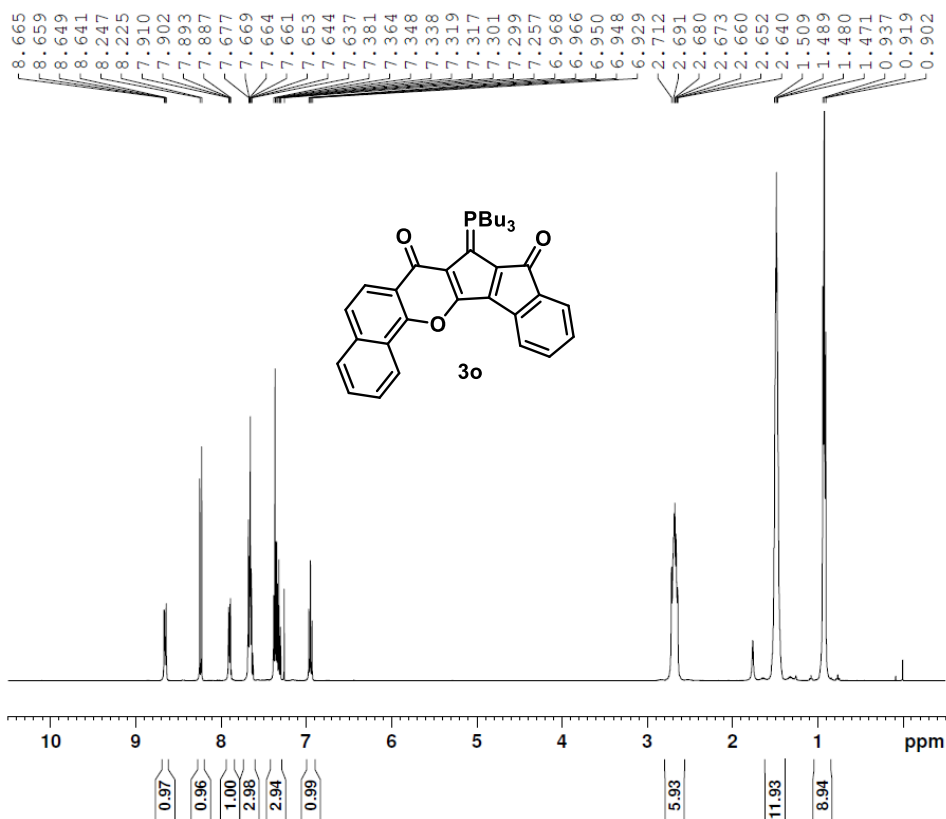

Current Data Parameters  
 NAME DP-1244 (3f)  
 EXPNO 7  
 PROCNO 1

F2 - Acquisition Parameters  
 Date\_ 20240501  
 Time 22.00  
 INSTRUM spect  
 PROBHD 5 mm PABBO BB/  
 PULPROG zg30  
 TD 32768  
 SOLVENT CDCl3  
 NS 16  
 DS 0  
 SWH 7211.539 Hz  
 FIDRES 0.220079 Hz  
 AQ 2.2719147 sec  
 RG 57.42  
 DW 69.333 usec  
 DE 10.06 usec  
 TE 298.3 K  
 D1 2.0000000 sec  
 TD0 1

===== CHANNEL f1 =====  
 SFO1 400.1324008 MHz  
 NUC1 1H  
 P1 15.00 usec  
 PLW1 13.5000000 W

F2 - Processing parameters  
 SI 16384  
 SF 400.1300107 MHz  
 WDW EM  
 SSB 0  
 LB 0 Hz  
 GB 0  
 PC 1.00

<sup>13</sup>C NMR spectrum of compound **3o** (CDCl<sub>3</sub>, 100 MHz)

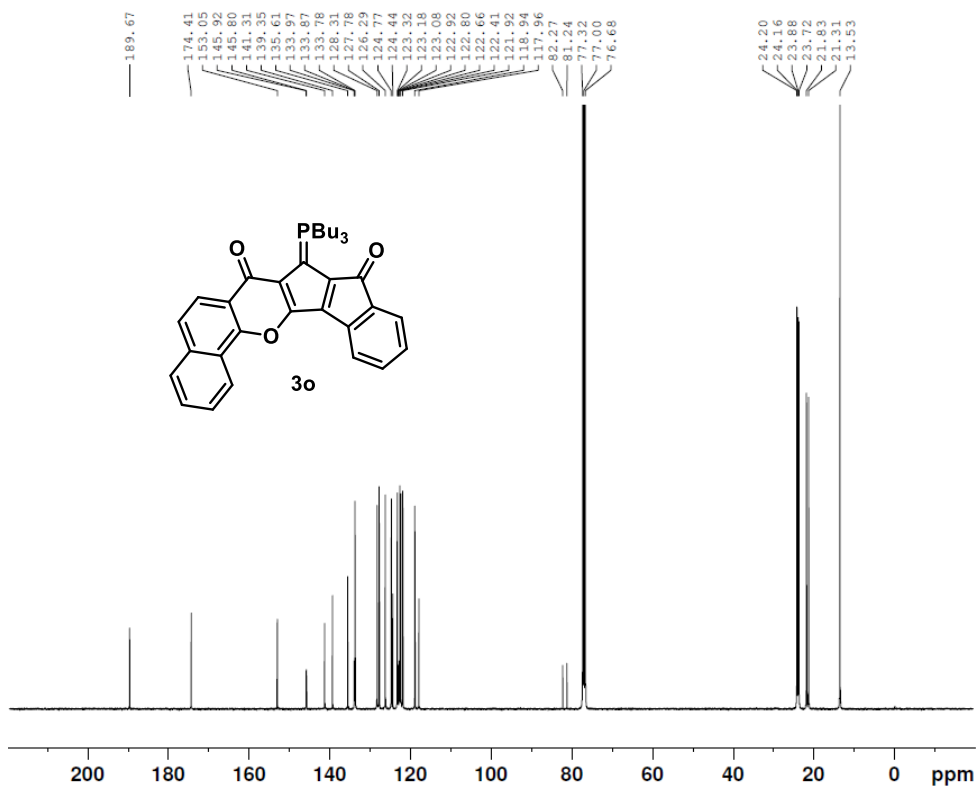

Current Data Parameters  
 NAME DP-1244 (3f)  
 EXPNO 8  
 PROCNO 1

F2 - Acquisition Parameters  
 Date\_ 20240501  
 Time 22.01  
 INSTRUM spect  
 PROBHD 5 mm PABBO BB/  
 PULPROG zgpg30  
 TD 32768  
 SOLVENT CDCl3  
 NS 15259  
 DS 0  
 SWH 24038.461 Hz  
 FIDRES 0.733596 Hz  
 AQ 0.6815744 sec  
 RG 198.09  
 DW 20.800 usec  
 DE 6.50 usec  
 TE 298.3 K  
 D1 2.0000000 sec  
 D11 0.0300000 sec  
 TD0 1

===== CHANNEL f1 =====  
 SFO1 100.6228298 MHz  
 NUC1 13C  
 P1 10.00 usec  
 PLW1 49.5000000 W

===== CHANNEL f2 =====  
 SFO2 400.1316005 MHz  
 NUC2 1H  
 CPDPRG[2] waltz16  
 PCPD2 90.00 usec  
 PLW2 12.5000000 W  
 PLW12 0.34722000 W  
 PLW13 0.28125000 W

F2 - Processing parameters  
 SI 32768  
 SF 100.6127727 MHz  
 WDW EM  
 SSB 0  
 LB 2.00 Hz  
 GB 0  
 PC 1.00

<sup>31</sup>P NMR spectrum of compound 3o (CDCl<sub>3</sub>, 162 MHz)

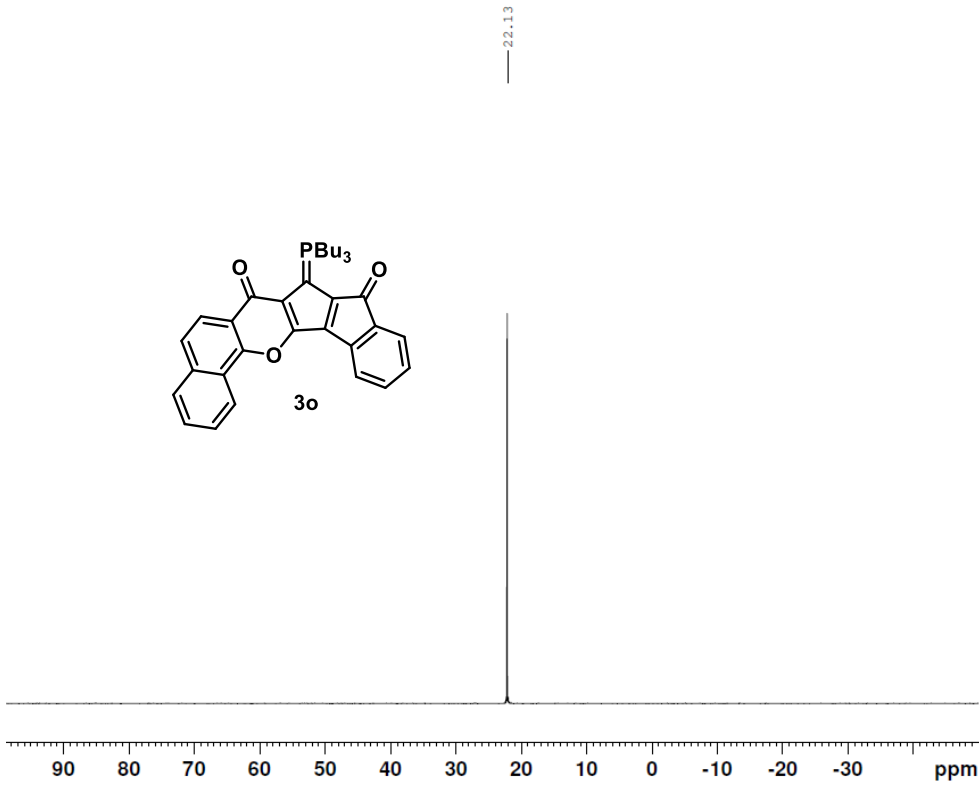

```

Current Data Parameters
NAME      DP-1244 (3F)
EXPNO    1
PROCNO   1

F2 - Acquisition Parameters
Date_    20240416
Time     14.25
INSTRUM spect
PROBHD   5 mm PABBO BB/
PULPROG zgpg30
TD       65536
SOLVENT  CDCl3
NS       10
DS       4
SWH      49019.609 Hz
FIDRES   0.747980 Hz
AQ       0.6684672 sec
RG       198.09
DW       10.200 usec
DE       6.50 usec
TE       298.7 K
D1       2.00000000 sec
D11      0.03000000 sec
TD0      1

===== CHANNEL f1 =====
SFO1     161.9836917 MHz
NUC1     31P
P1       15.00 usec
PLW1     13.19999981 W

===== CHANNEL f2 =====
SFO2     400.1316005 MHz
NUC2     1H
CPDPRG[2] waltz16
PCPD2    90.00 usec
PLW2     12.50000000 W
PLW12    0.34722000 W
PLW13    0.28125000 W

F2 - Processing parameters
SI       32768
SF       161.9755930 MHz
WDW      EM
SSB      0
LB       2.00 Hz
GB       0
PC       1.40
    
```

<sup>1</sup>H NMR spectrum of compound 3p (CDCl<sub>3</sub>, 400 MHz)

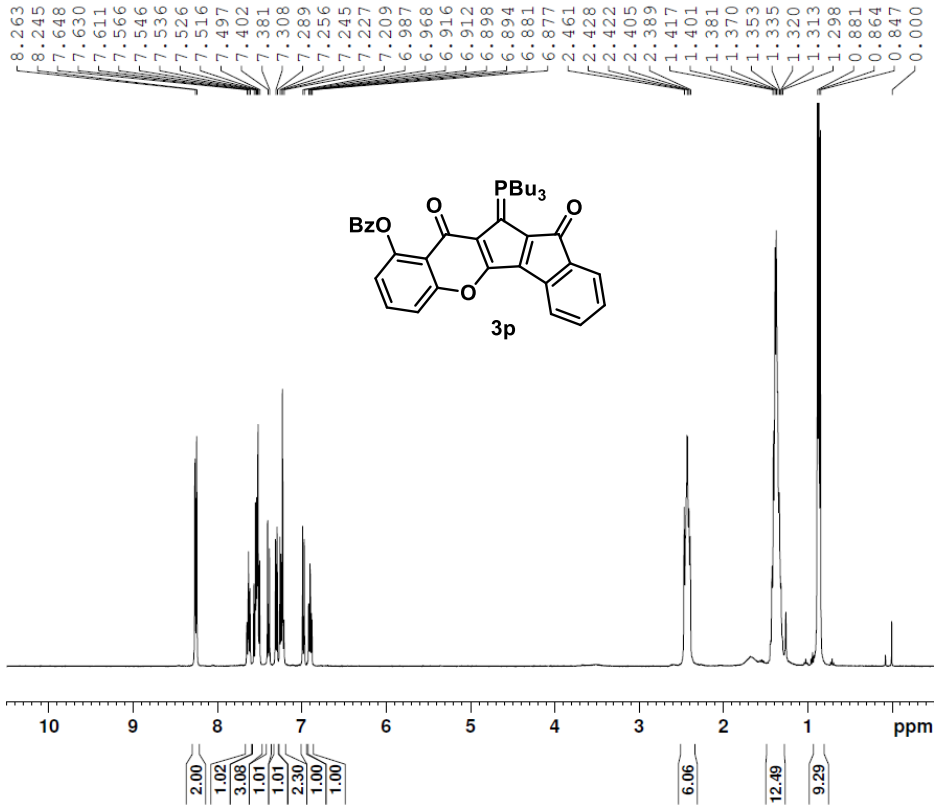

```

Current Data Parameters
NAME      DP-1274
EXPNO    4
PROCNO   1

F2 - Acquisition Parameters
Date_    20240507
Time     23.24
INSTRUM spect
PROBHD   5 mm BBO BB-1H
PULPROG zg30
TD       32768
SOLVENT  CDCl3
NS       16
DS       0
SWH      7246.377 Hz
FIDRES   0.221142 Hz
AQ       2.2609921 sec
RG       114
DW       69.000 usec
DE       6.50 usec
TE       296.0 K
D1       2.00000000 sec
TD0      1

===== CHANNEL f1 =====
NUC1     1H
P1       15.00 usec
PL1     11.10 dB
SFO1     400.1324008 MHz

F2 - Processing parameters
SI       16384
SF       400.1300108 MHz
WDW      EM
SSB      0
LB       0 Hz
GB       0
PC       1.00
    
```

<sup>13</sup>C NMR spectrum of compound 3p (CDCl<sub>3</sub>, 100 MHz)

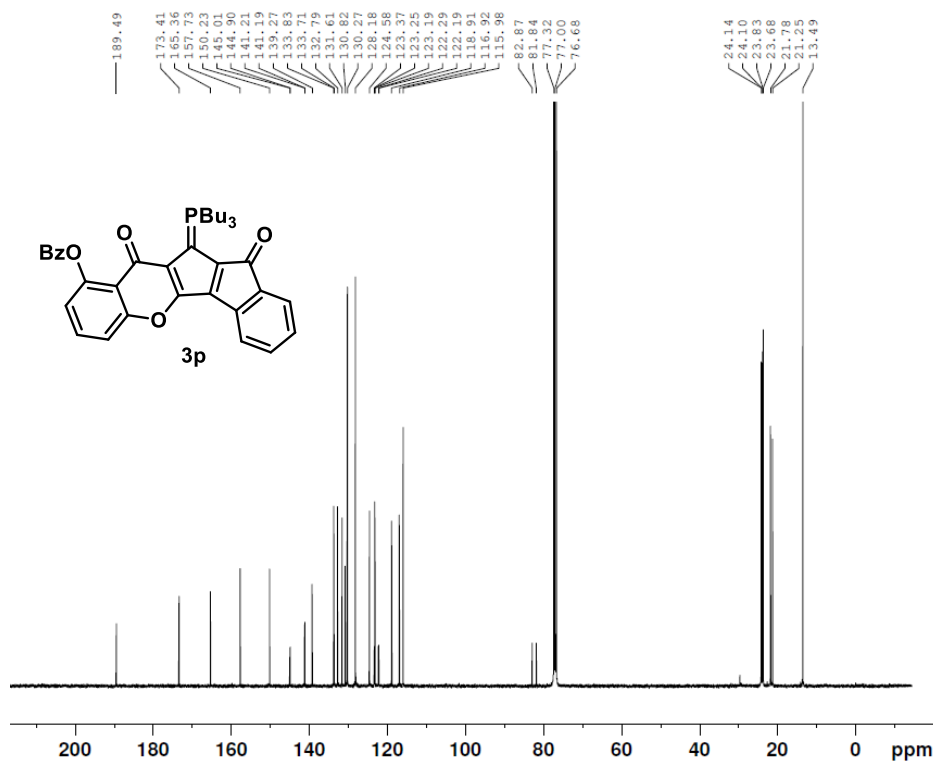

Current Data Parameters  
NAME DP-1274  
EXPNO 5  
PROCNO 1

F2 - Acquisition Parameters  
Date\_ 20240507  
Time 23.26  
INSTRUM spect  
PROBHD 5 mm BBO BB-1H  
PULPROG zgpg30  
TD 32768  
SOLVENT CDCl3  
NS 13966  
DS 0  
SWH 24038.461 Hz  
FIDRES 0.733596 Hz  
AQ 0.6815744 sec  
RG 4096  
DW 20.800 usec  
DE 6.50 usec  
TE 296.1 K  
D1 2.00000000 sec  
D11 0.03000000 sec  
TD0 1

==== CHANNEL f1 =====  
NUC1 13C  
P1 10.00 usec  
PL1 4.20 dB  
SFO1 100.6233325 MHz

==== CHANNEL f2 =====  
CPDPRG[2] waltz16  
NUC2 1H  
PCPD2 90.00 usec  
PL2 10.20 dB  
PL12 26.00 dB  
PL13 29.00 dB  
SFO2 400.1316005 MHz

F2 - Processing parameters  
SI 32768  
SF 100.6127730 MHz  
WDW EM  
SSB 0  
LB 1.00 Hz  
GB 0  
PC 1.00

<sup>31</sup>P NMR spectrum of compound 3p (CDCl<sub>3</sub>, 162 MHz)

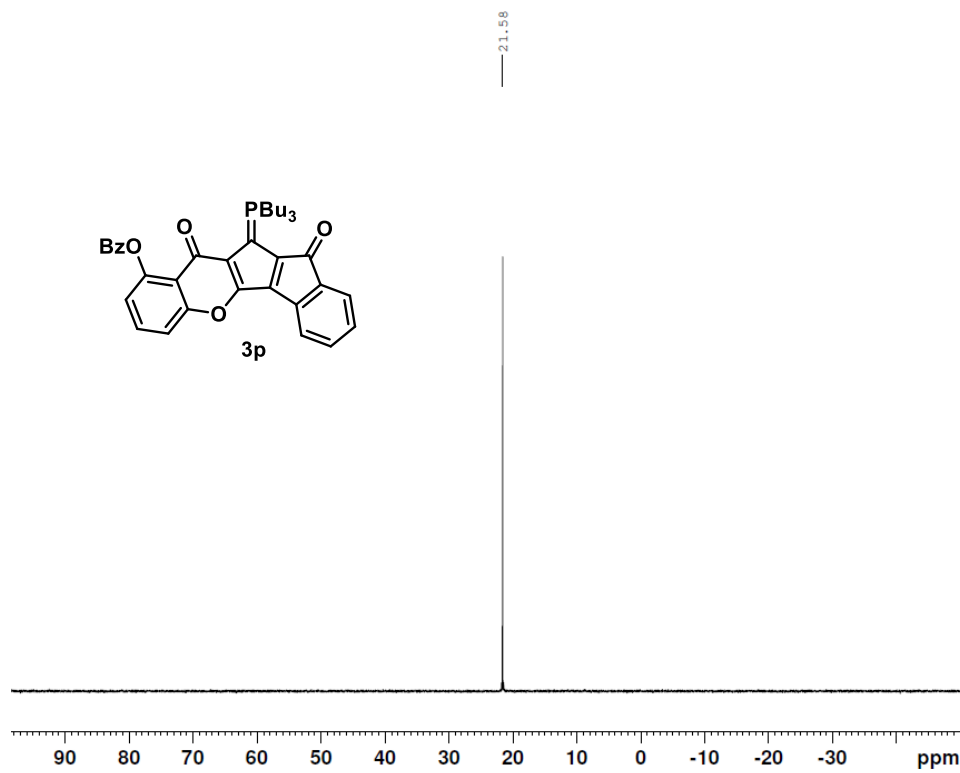

Current Data Parameters  
NAME DP-1274  
EXPNO 1  
PROCNO 1

F2 - Acquisition Parameters  
Date\_ 20240507  
Time 21.49  
INSTRUM spect  
PROBHD 5 mm BBO BB-1H  
PULPROG zgpg30  
TD 65536  
SOLVENT CDCl3  
NS 11  
DS 0  
SWH 64724.918 Hz  
FIDRES 0.987624 Hz  
AQ 0.5062656 sec  
RG 13004  
DW 7.725 usec  
DE 6.50 usec  
TE 296.1 K  
D1 2.00000000 sec  
D11 0.03000000 sec  
TD0 1

==== CHANNEL f1 =====  
NUC1 31P  
P1 15.40 usec  
PL1 12.00 dB  
SFO1 161.9674942 MHz

==== CHANNEL f2 =====  
CPDPRG[2] waltz16  
NUC2 1H  
PCPD2 90.00 usec  
PL2 10.20 dB  
PL12 26.00 dB  
PL13 29.00 dB  
SFO2 400.1316005 MHz

F2 - Processing parameters  
SI 32768  
SF 161.9755930 MHz  
WDW EM  
SSB 0  
LB 1.00 Hz  
GB 0  
PC 1.00

**<sup>1</sup>H NMR spectrum of compound 3q (CDCl<sub>3</sub>, 400 MHz)**

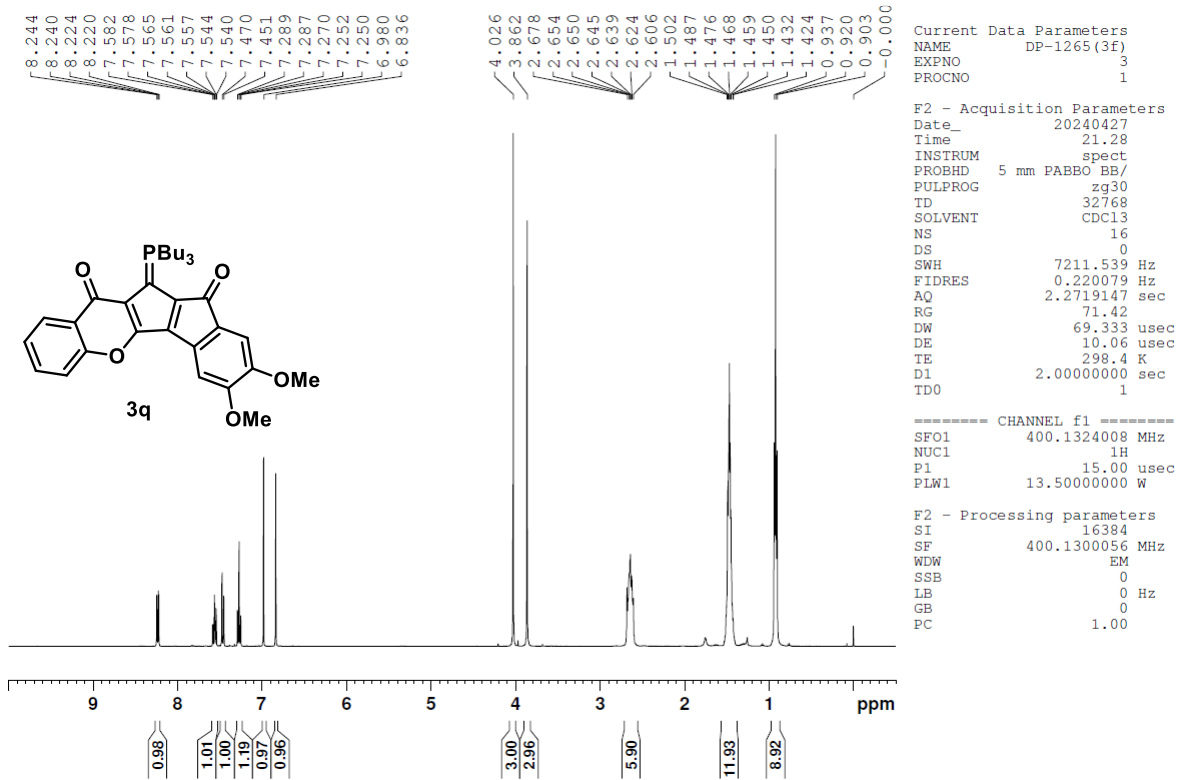

**<sup>13</sup>C NMR spectrum of compound 3q (CDCl<sub>3</sub>, 100 MHz)**

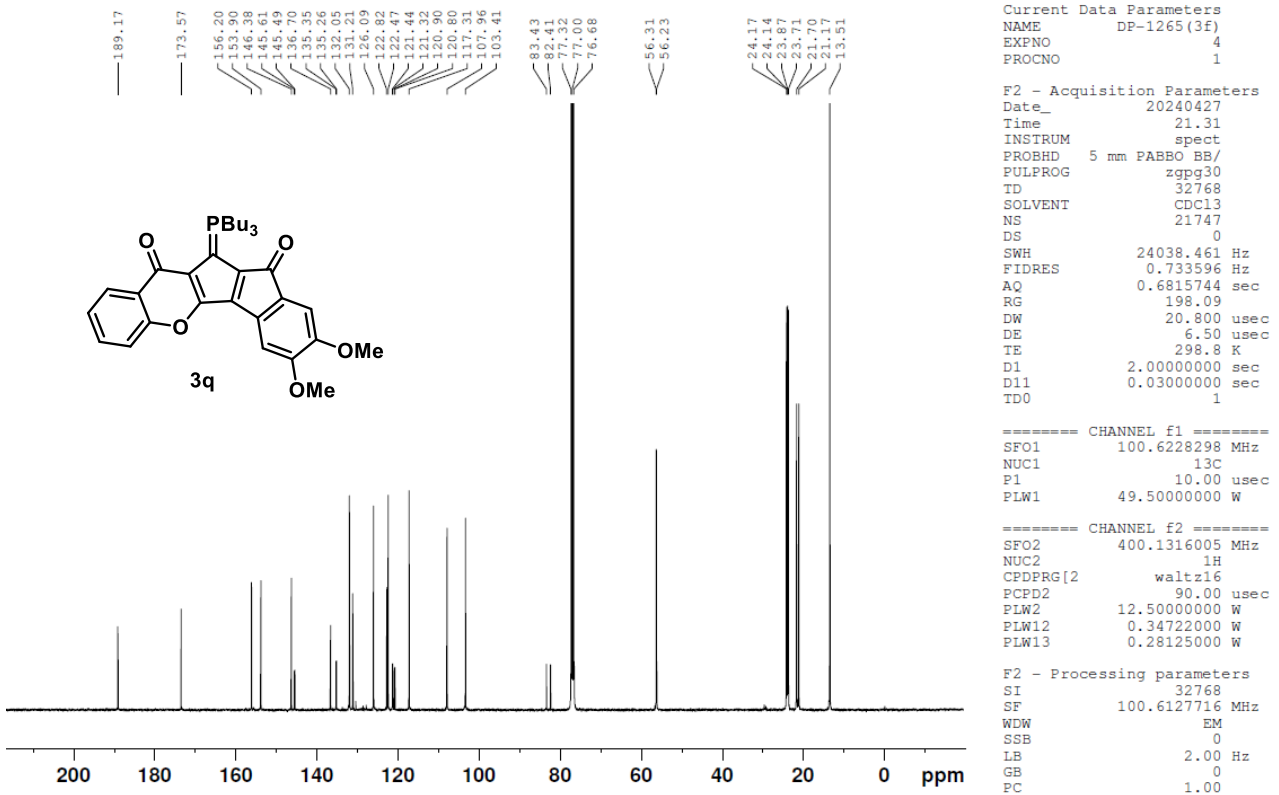

<sup>31</sup>P NMR spectrum of compound **3q** (CDCl<sub>3</sub>, 162 MHz)

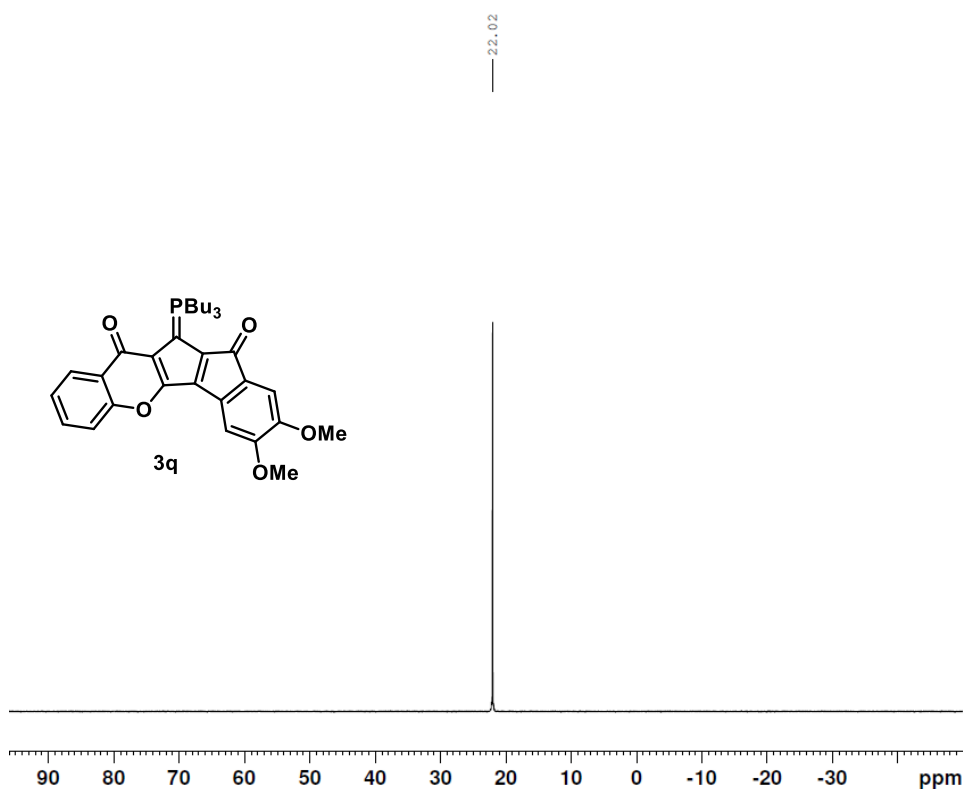

```

Current Data Parameters
NAME          DP-1265(3f)
EXPNO         1
PROCNO        1

F2 - Acquisition Parameters
Date_         20240427
Time          17.52
INSTRUM       spect
PROBHD        5 mm PABBO BB/
PULPROG       zgpg30
TD            65536
SOLVENT       CDC13
NS            11
DS            4
SWH           49019.609 Hz
FIDRES        0.747980 Hz
AQ            0.6684672 sec
RG            198.09
DW            10.200 usec
DE            6.50 usec
TE            298.2 K
D1            2.00000000 sec
D11           0.03000000 sec
TD0           1

===== CHANNEL f1 =====
SF01          161.9836917 MHz
NUC1           31P
P1            15.00 usec
PLW1          13.19999981 W

===== CHANNEL f2 =====
SF02          400.1316005 MHz
NUC2           1H
CPDPRG[2]     waltz16
PCPD2         90.00 usec
PLW2          12.50000000 W
PLW12         0.34722000 W
PLW13         0.28125000 W

F2 - Processing parameters
SI            32768
SF           161.9755930 MHz
WDW           EM
SSB           0
LB            2.00 Hz
GB            0
PC            1.40
    
```

<sup>1</sup>H NMR spectrum of compound **6** (CDCl<sub>3</sub>, 400 MHz)

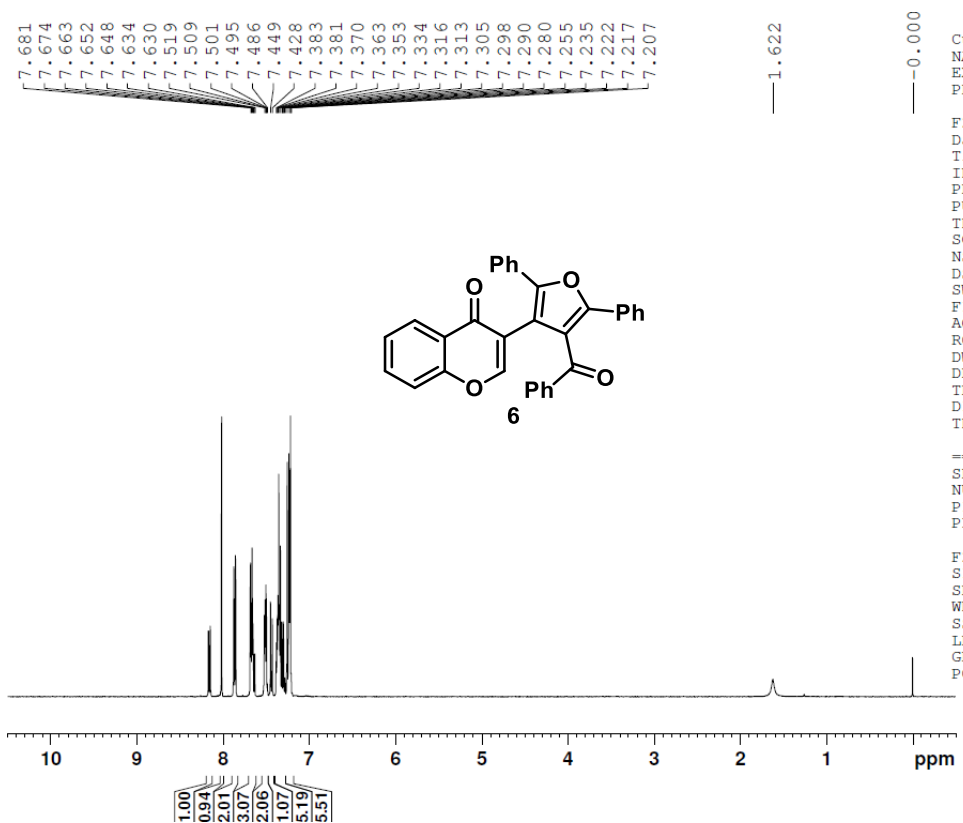

```

Current Data Parameters
NAME          JN-039(3f)
EXPNO         3
PROCNO        1

F2 - Acquisition Parameters
Date_         20240429
Time          19.19
INSTRUM       spect
PROBHD        5 mm PABBO BB/
PULPROG       zg30
TD            32768
SOLVENT       CDC13
NS            9
DS            0
SWH           7211.539 Hz
FIDRES        0.220079 Hz
AQ            2.2719147 sec
RG            128.9
DW            69.333 usec
DE            10.06 usec
TE            298.2 K
D1            2.00000000 sec
TD0           1

===== CHANNEL f1 =====
SF01          400.1324008 MHz
NUC1           1H
P1            15.00 usec
PLW1          13.50000000 W

F2 - Processing parameters
SI            16384
SF           400.1300117 MHz
WDW           EM
SSB           0
LB            0 Hz
GB            0
PC            1.00
    
```

<sup>13</sup>C NMR spectrum of compound 6 (CDCl<sub>3</sub>, 100 MHz)

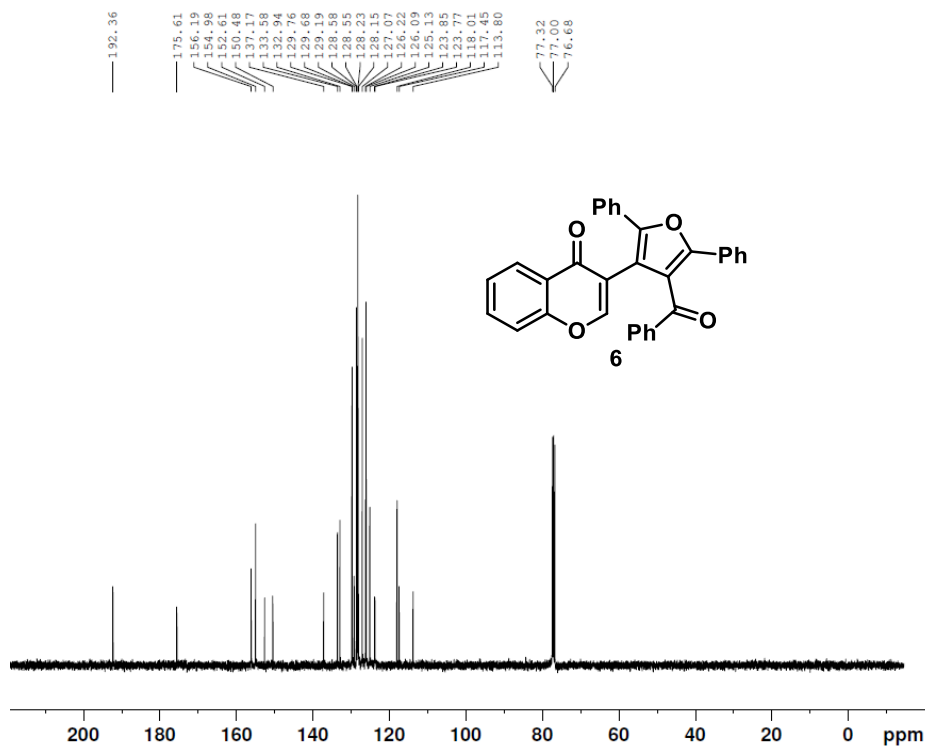

Current Data Parameters  
 NAME JN-039  
 EXPNO 2  
 PROCNO 1

F2 - Acquisition Parameters  
 Date\_ 20240429  
 Time 19.51  
 INSTRUM spect  
 PROBHD 5 mm BBO BB-1H  
 PULPROG zgpg30  
 TD 32768  
 SOLVENT CDCl3  
 NS 101  
 DS 0  
 SWH 24038.461 Hz  
 FIDRES 0.733596 Hz  
 AQ 0.6815744 sec  
 RG 4096  
 DW 20.800 usec  
 DE 6.50 usec  
 TE 297.1 K  
 D1 2.0000000 sec  
 D11 0.0300000 sec  
 TDO 1

==== CHANNEL f1 =====  
 NUC1 13C  
 P1 10.00 usec  
 PL1 4.20 dB  
 SFO1 100.6233325 MHz

==== CHANNEL F2 =====  
 CPDPRG[2] waltz16  
 NUC2 1H  
 PCPD2 90.00 usec  
 PL2 10.20 dB  
 PL12 26.00 dB  
 PL13 29.00 dB  
 SFO2 400.1316005 MHz

F2 - Processing parameters  
 SI 32768  
 SF 100.6127872 MHz  
 WDW EM  
 SSB 0  
 LB 1.00 Hz  
 GB 0  
 PC 1.00

<sup>1</sup>H NMR spectrum of compound 5aa (CDCl<sub>3</sub>, 400 MHz)

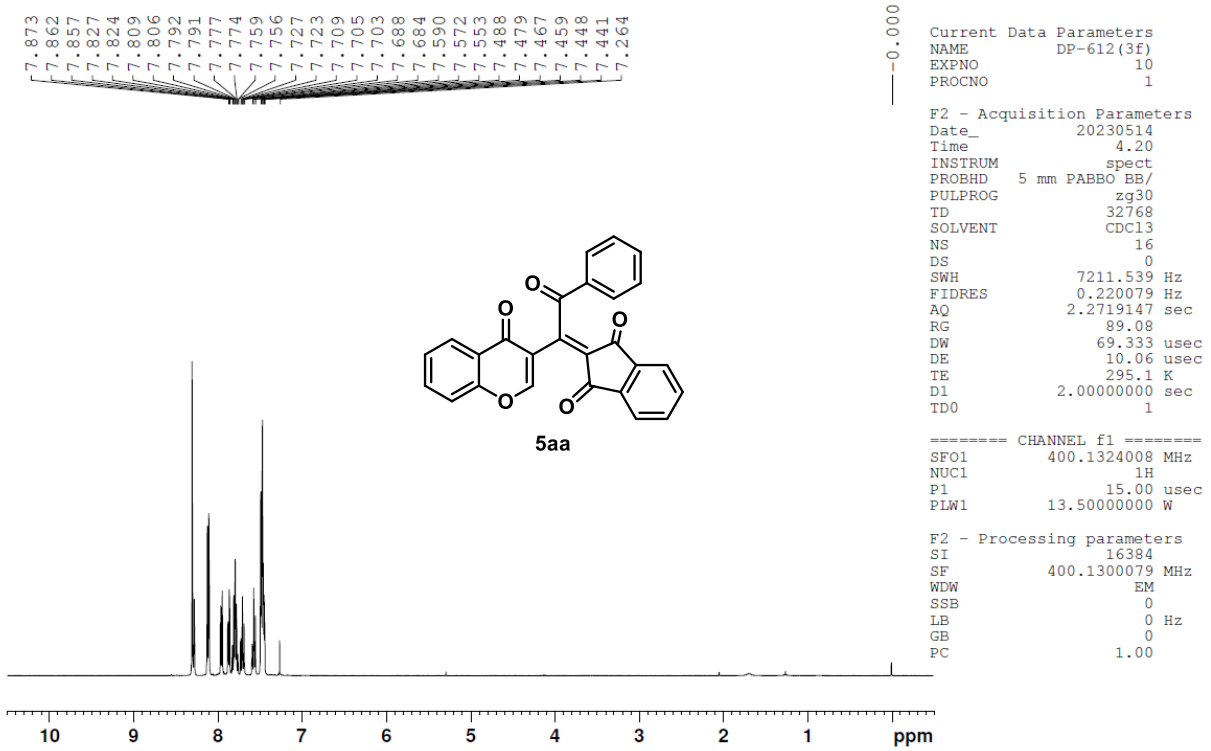

<sup>13</sup>C NMR spectrum of compound 5aa (CDCl<sub>3</sub>, 100 MHz)

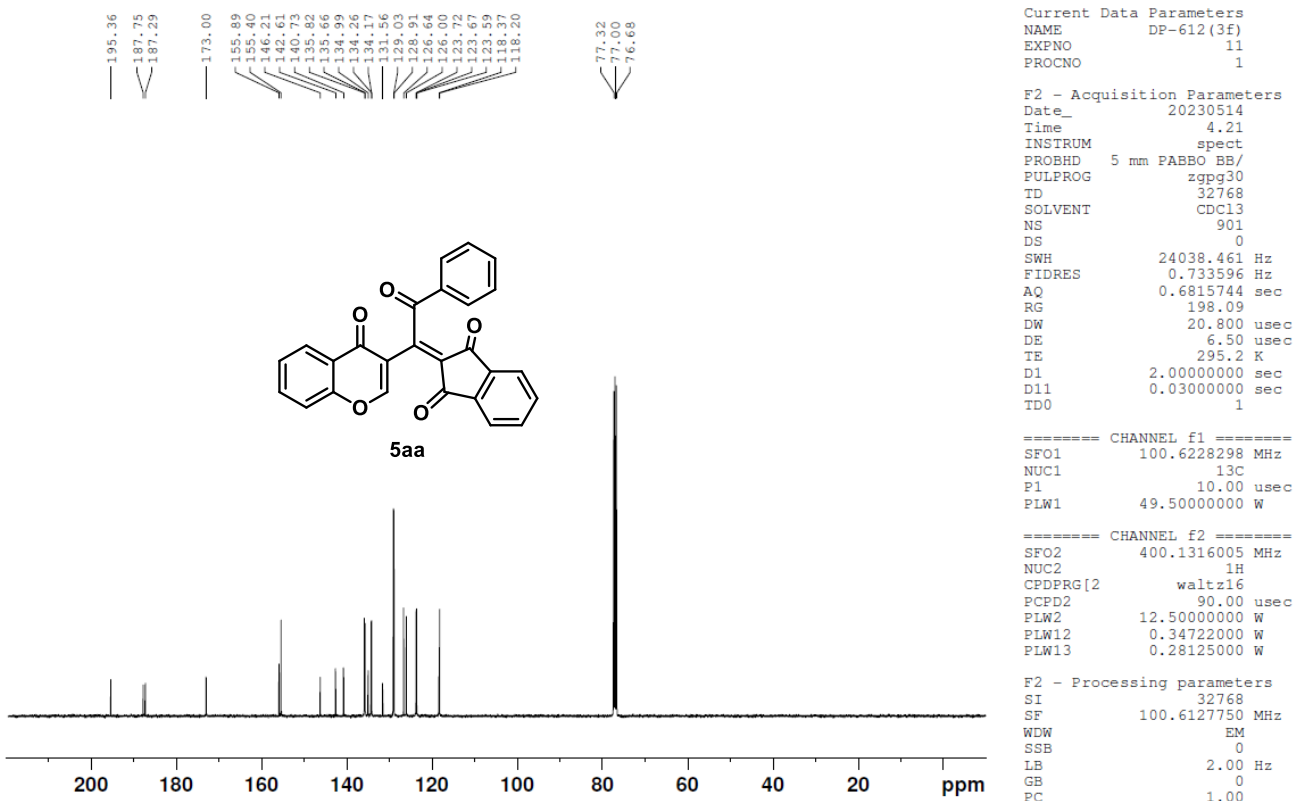

<sup>1</sup>H NMR spectrum of compound **5ba** (CDCl<sub>3</sub>, 400 MHz)

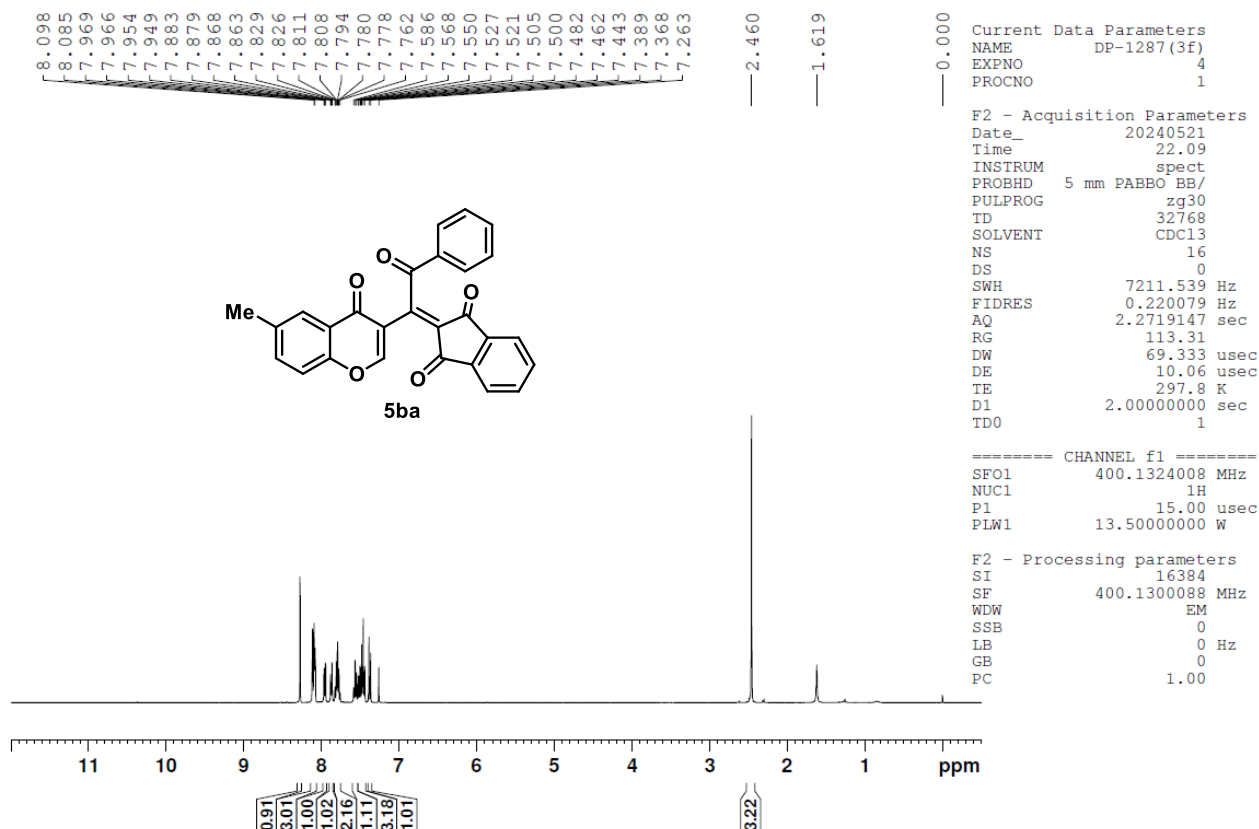

<sup>13</sup>C NMR spectrum of compound **5ba** (CDCl<sub>3</sub>, 100 MHz)

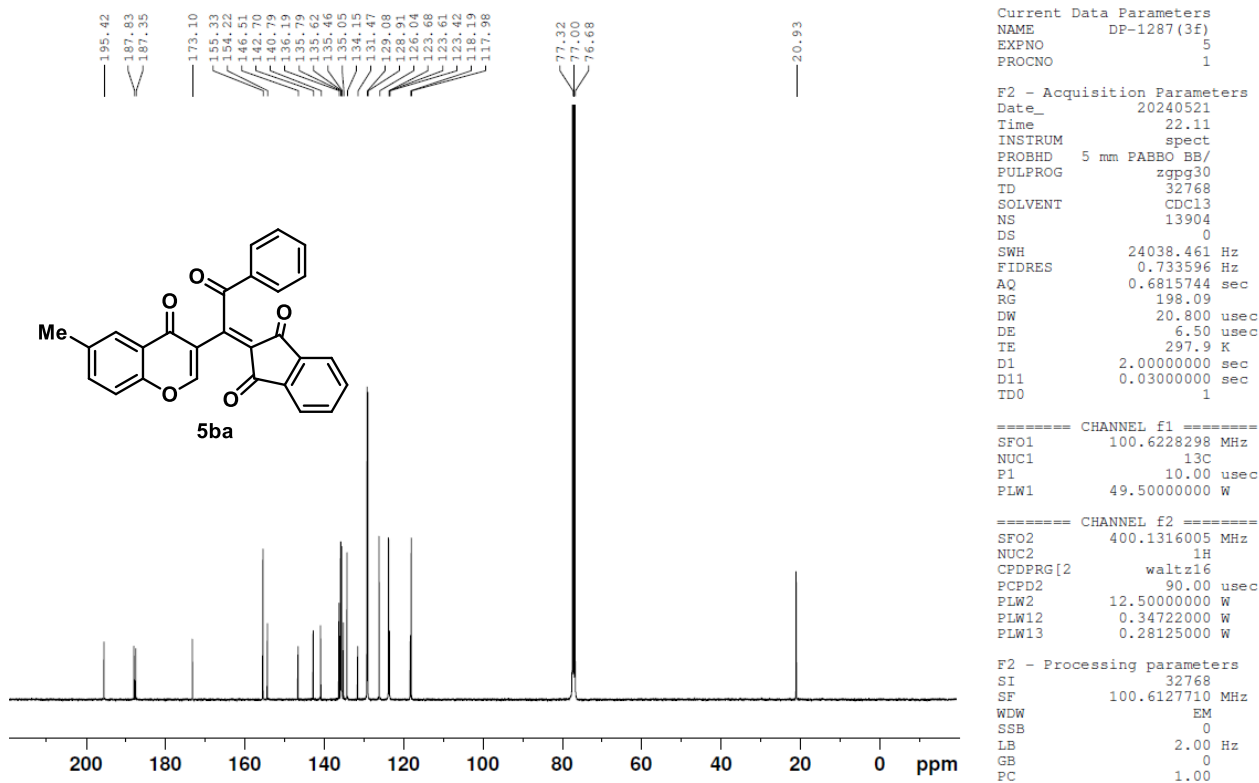



### <sup>1</sup>H NMR spectrum of compound **5ea** (CDCl<sub>3</sub>, 400 MHz)

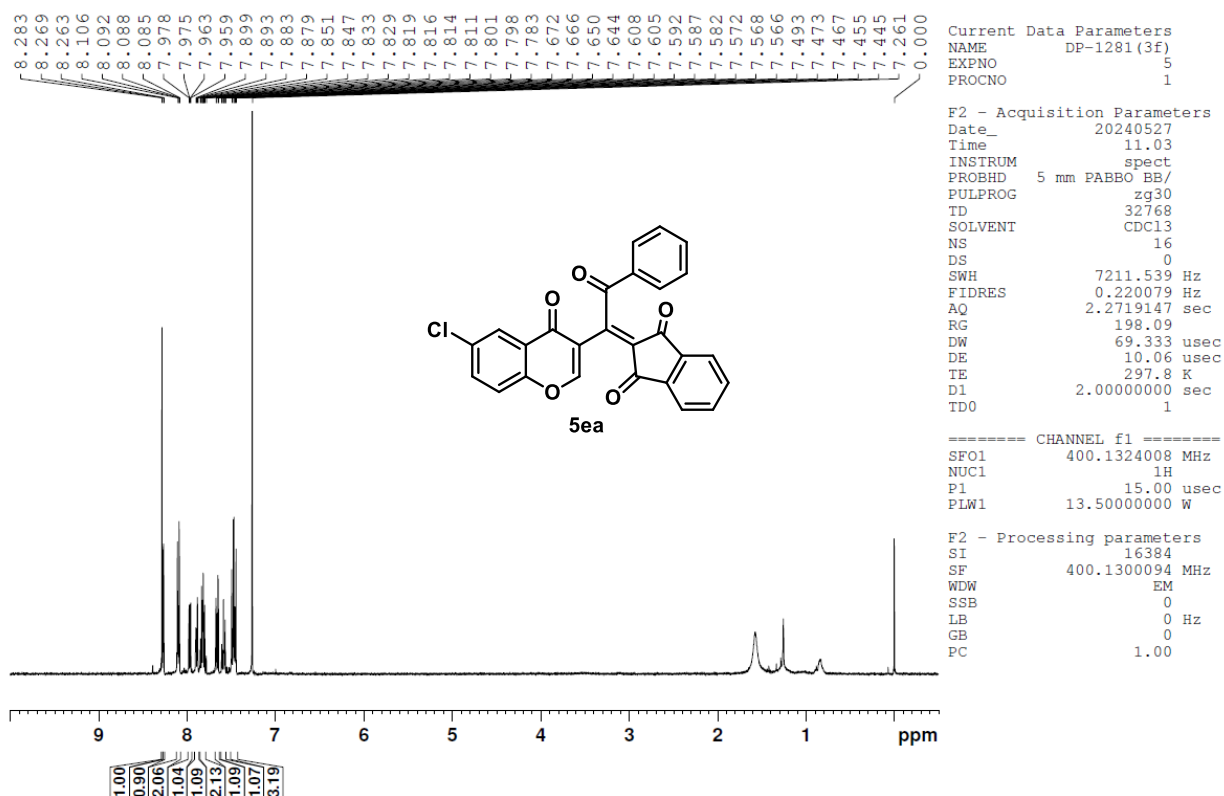

### <sup>13</sup>C NMR spectrum of compound **5ea** (CDCl<sub>3</sub>, 100 MHz)

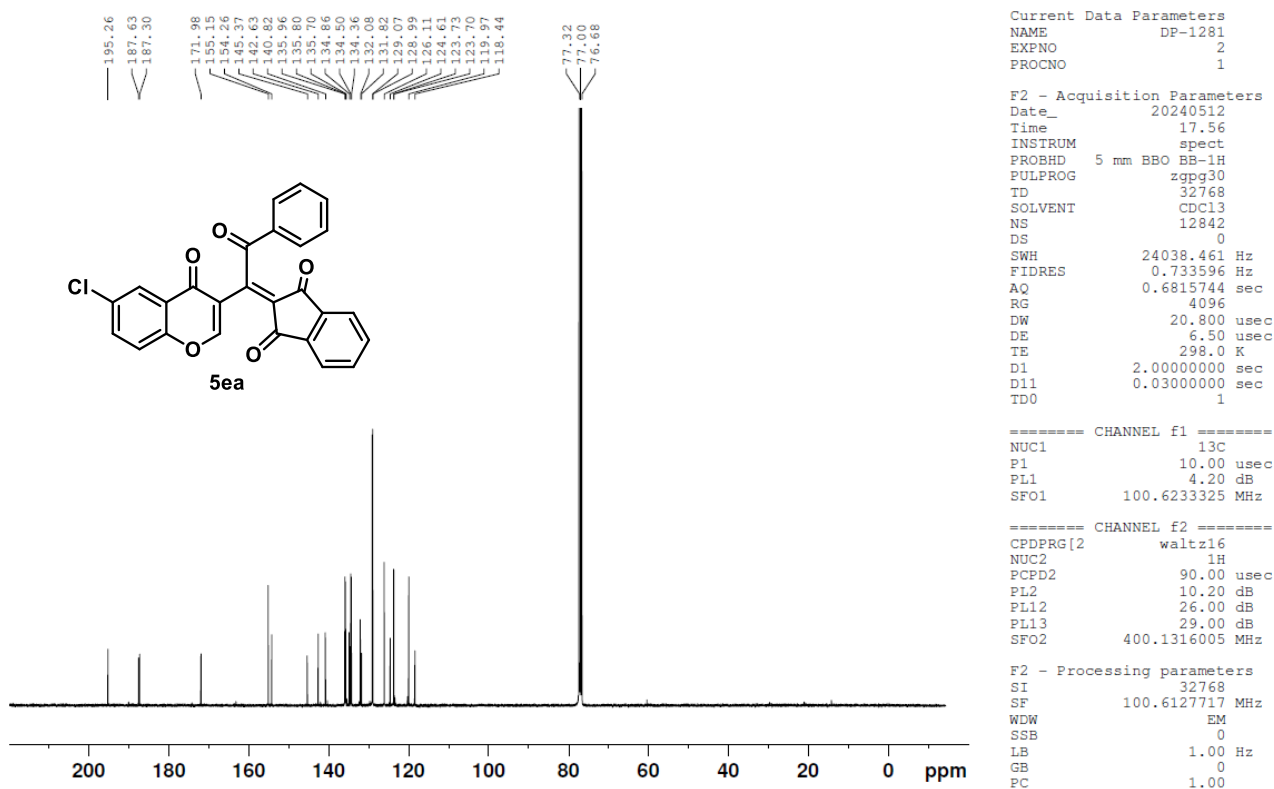

<sup>1</sup>H NMR spectrum of compound **5ia** (CDCl<sub>3</sub>, 400 MHz)

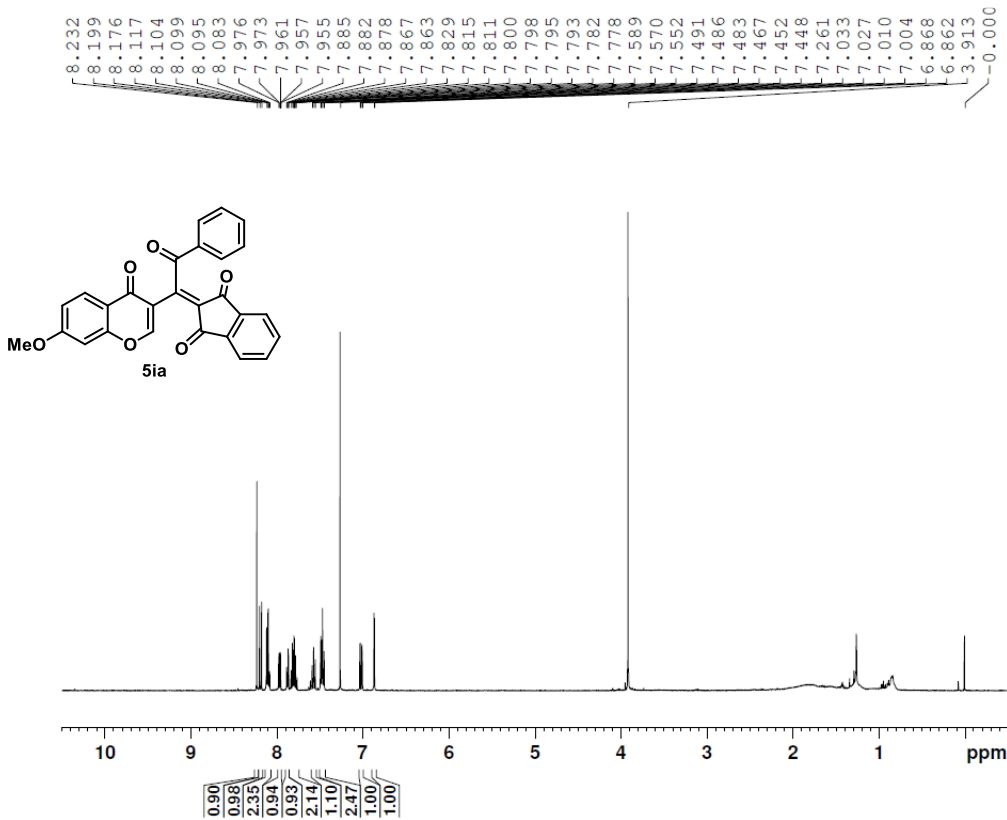

Current Data Parameters  
NAME JN-087(3f)  
EXPNO 5  
PROCNO 1

F2 - Acquisition Parameters  
Date\_ 20240605  
Time 9.48  
INSTRUM spect  
PROBHD 5 mm PABBO BB/  
PULPROG zg30  
TD 32768  
SOLVENT CDCl3  
NS 16  
DS 0  
SWH 7211.539 Hz  
FIDRES 0.220079 Hz  
AQ 2.2719147 sec  
RG 177.16  
DW 69.333 usec  
DE 10.06 usec  
TE 298.4 K  
D1 2.00000000 sec  
TD0 1

===== CHANNEL f1 =====  
SFO1 400.1324008 MHz  
NUC1 1H  
P1 15.00 usec  
PLW1 13.50000000 W

F2 - Processing parameters  
SI 16384  
SF 400.1300092 MHz  
WDW EM  
SSB 0  
LB 0 Hz  
GB 0  
PC 1.00

<sup>13</sup>C NMR spectrum of compound **5ia** (CDCl<sub>3</sub>, 100 MHz)

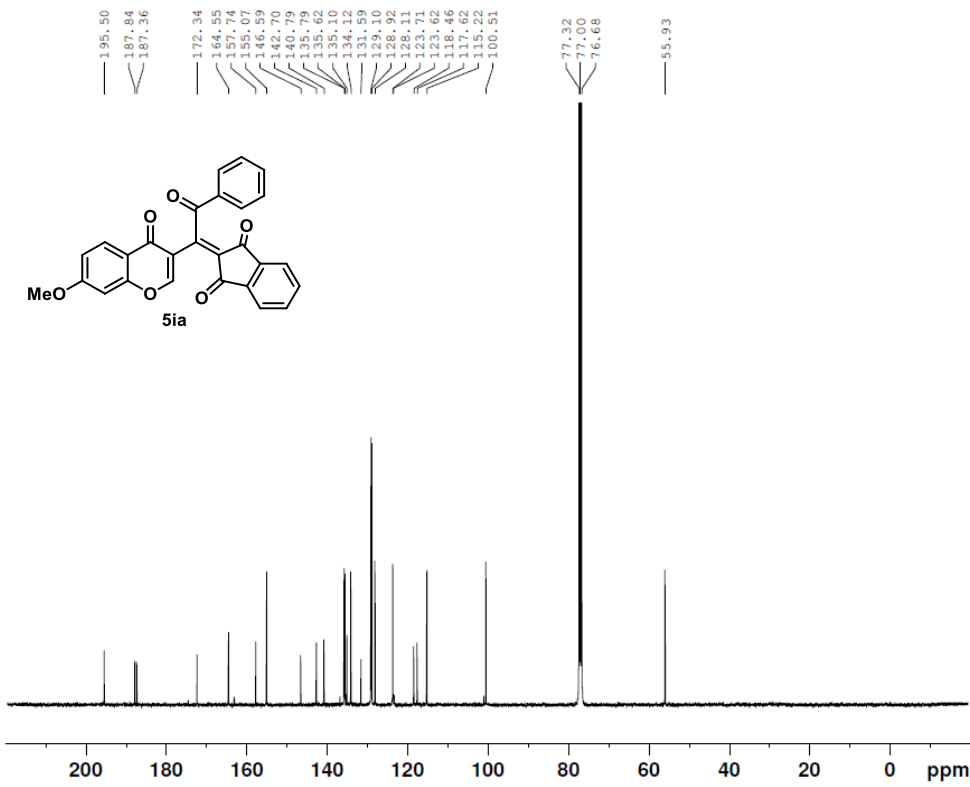

Current Data Parameters  
NAME JN-087(3f)  
EXPNO 4  
PROCNO 1

F2 - Acquisition Parameters  
Date\_ 20240603  
Time 22.16  
INSTRUM spect  
PROBHD 5 mm PABBO BB/  
PULPROG zgpg30  
TD 32768  
SOLVENT CDCl3  
NS 14290  
DS 0  
SWH 24038.461 Hz  
FIDRES 0.733596 Hz  
AQ 0.6815744 sec  
RG 198.09  
DW 20.800 usec  
DE 6.50 usec  
TE 298.4 K  
D1 2.00000000 sec  
D11 0.03000000 sec  
TD0 1

===== CHANNEL f1 =====  
SFO1 100.6228298 MHz  
NUC1 13C  
P1 10.00 usec  
PLW1 49.50000000 W

===== CHANNEL f2 =====  
SFO2 400.1316005 MHz  
NUC2 1H  
CPDPRG[2] waltz16  
PCPD2 90.00 usec  
PLW2 12.50000000 W  
PLW12 0.34722000 W  
PLW13 0.28125000 W

F2 - Processing parameters  
SI 32768  
SF 100.6127695 MHz  
WDW EM  
SSB 0  
LB 2.00 Hz  
GB 0  
PC 1.00

**<sup>1</sup>H NMR spectrum of compound 5ja (CDCl<sub>3</sub>, 400 MHz)**

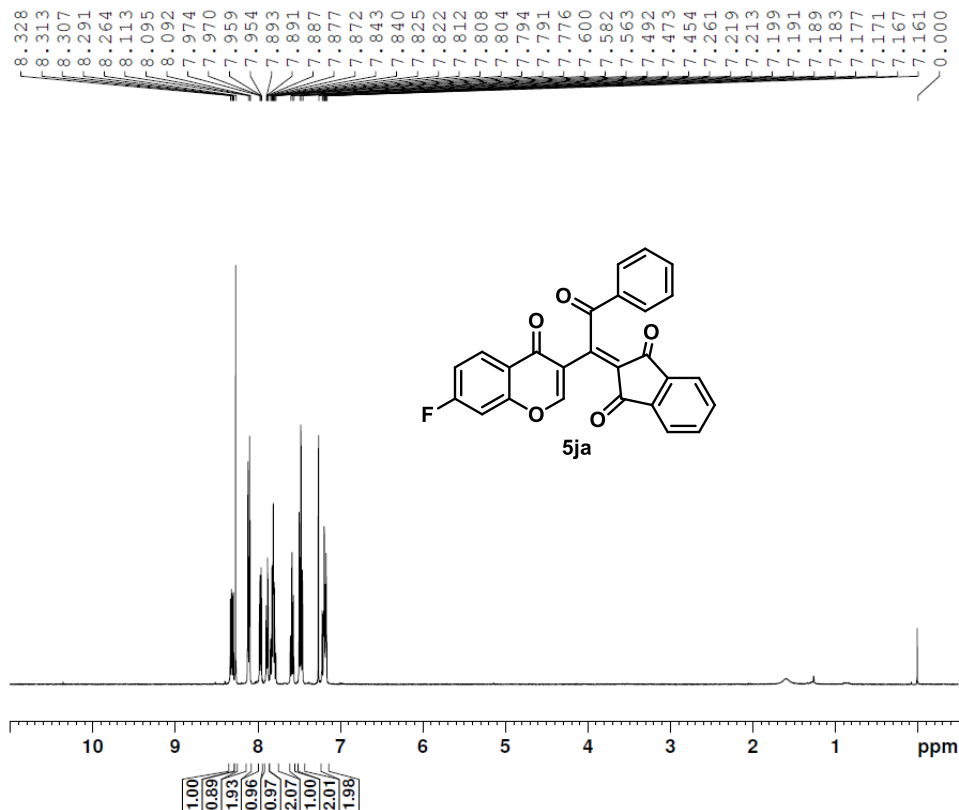

Current Data Parameters  
NAME DP-1282 (3f)  
EXPNO 5  
PROCNO 1

F2 - Acquisition Parameters  
Date\_ 20240514  
Time 18.42  
INSTRUM spect  
PROBHD 5 mm PABBO BB/  
PULPROG zg30  
TD 32768  
SOLVENT CDCl3  
NS 16  
DS 0  
SWH 7211.539 Hz  
FIDRES 0.220079 Hz  
AQ 2.2719147 sec  
RG 158.74  
DW 69.333 usec  
DE 10.06 usec  
TE 298.6 K  
D1 2.00000000 sec  
TD0 1

===== CHANNEL f1 =====  
SFO1 400.1324008 MHz  
NUC1 1H  
P1 15.00 usec  
PLW1 13.50000000 W

F2 - Processing parameters  
SI 16384  
SF 400.1300095 MHz  
WDW EM  
SSB 0  
LB 0 Hz  
GB 0  
PC 1.00

**<sup>13</sup>C NMR spectrum of compound 5ja (CDCl<sub>3</sub>, 100 MHz)**

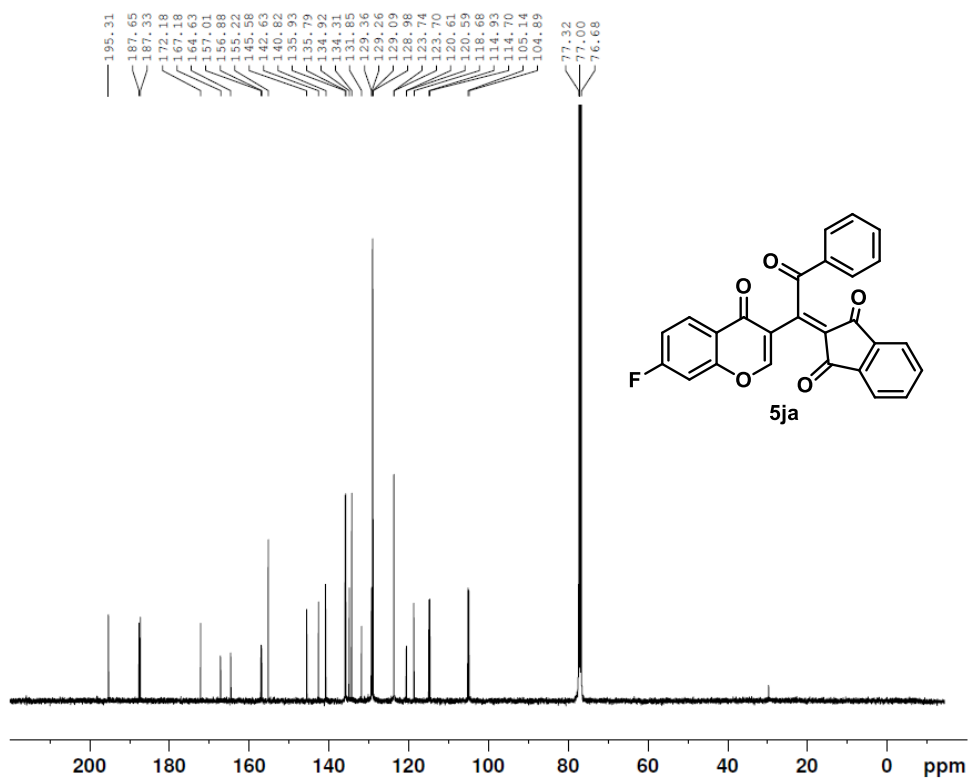

Current Data Parameters  
NAME DP-1282  
EXPNO 5  
PROCNO 1

F2 - Acquisition Parameters  
Date\_ 20240510  
Time 22.08  
INSTRUM spect  
PROBHD 5 mm BBO BB-1H  
PULPROG zgpg30  
TD 32768  
SOLVENT CDCl3  
NS 14389  
DS 0  
SWH 24038.461 Hz  
FIDRES 0.733596 Hz  
AQ 0.6815744 sec  
RG 4096  
DW 20.800 usec  
DE 6.50 usec  
TE 297.1 K  
D1 2.00000000 sec  
D11 0.03000000 sec  
TD0 1

===== CHANNEL f1 =====  
NUC1 13C  
P1 10.00 usec  
PL1 4.20 dB  
SFO1 100.6233325 MHz

===== CHANNEL f2 =====  
CPDPRG2 waltz16  
NUC2 1H  
PCPD2 90.00 usec  
PL2 10.20 dB  
PL12 26.00 dB  
PL13 29.00 dB  
SFO2 400.1316005 MHz

F2 - Processing parameters  
SI 32768  
SF 100.6127711 MHz  
WDW EM  
SSB 0  
LB 1.00 Hz  
GB 0  
PC 1.00

<sup>19</sup>F NMR spectrum of compound **5ja** (CDCl<sub>3</sub>, 376 MHz)

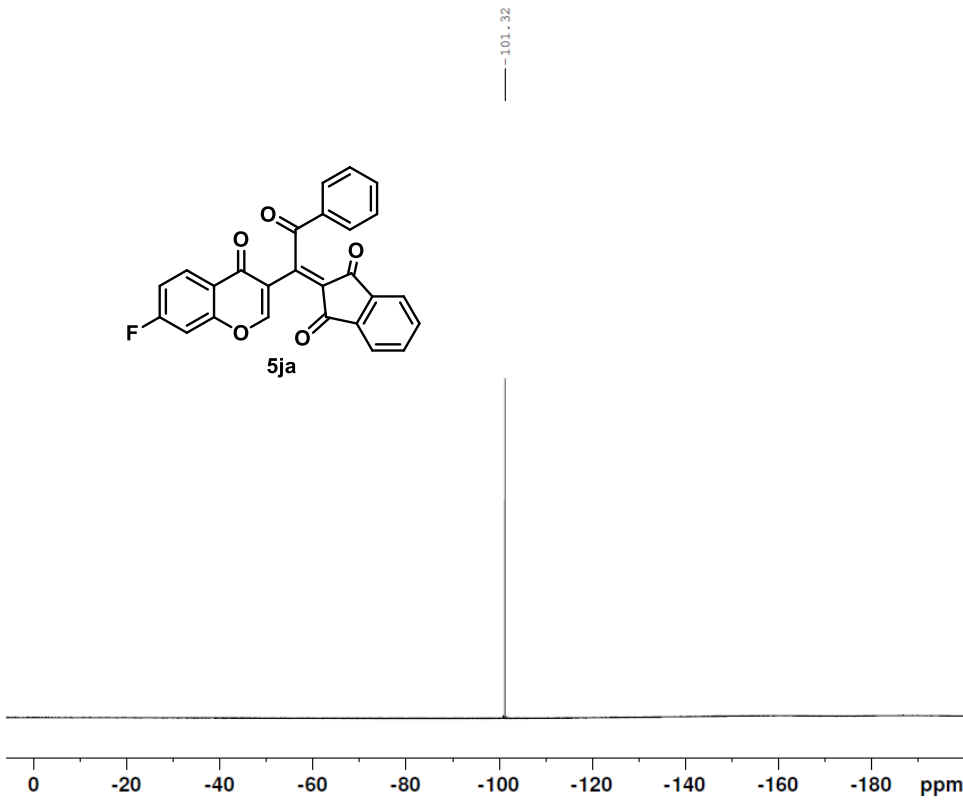

Current Data Parameters  
NAME DP-1282(3f)  
EXPNO 7  
PROCNO 1

F2 - Acquisition Parameters  
Date\_ 20240621  
Time 10.53  
INSTRUM spect  
PROBHD 5 mm PABBO BB/  
PULPROG zgig  
TD 131072  
SOLVENT CDCl3  
NS 16  
DS 0  
SWH 89285.711 Hz  
FIDRES 0.681196 Hz  
AQ 0.7340032 sec  
RG 198.09  
DW 5.600 usec  
DE 6.50 usec  
TE 298.7 K  
D1 1.00000000 sec  
D11 0.03000000 sec  
TD0 1

==== CHANNEL f1 =====  
SFO1 376.4607168 MHz  
NUC1 19F  
P1 15.00 usec  
PLW1 16.50000000 W

==== CHANNEL f2 =====  
SFO2 400.1316005 MHz  
NUC2 1H  
CPDPRG[2] waltz16  
PCPD2 90.00 usec  
PLW2 12.50000000 W  
PLW12 0.34722000 W

F2 - Processing parameters  
SI 65536  
SF 376.4983662 MHz  
WDW EM  
SSB 0  
LB 1.00 Hz  
GB 0  
PC 1.00

<sup>1</sup>H NMR spectrum of compound **5la** (CDCl<sub>3</sub>, 400 MHz)

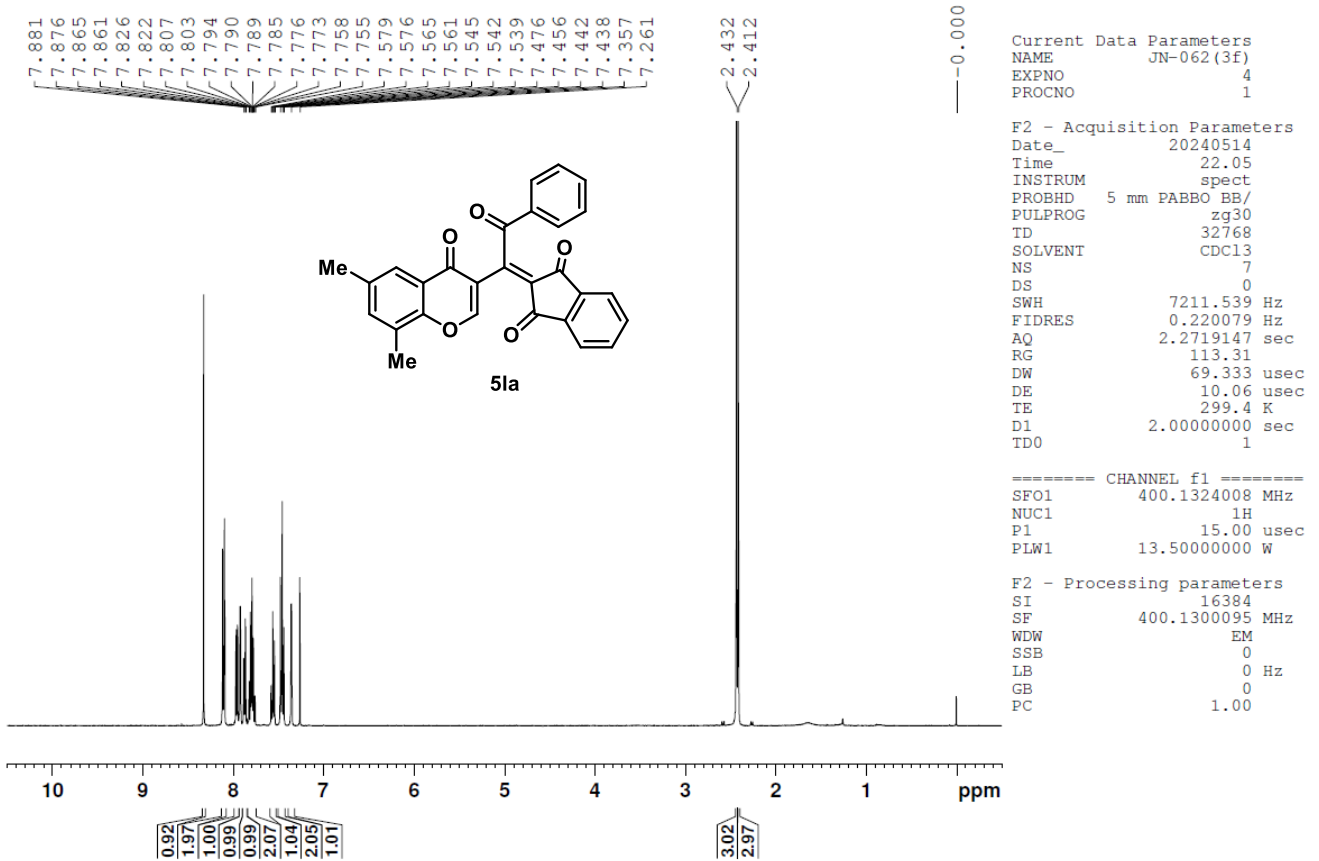

<sup>13</sup>C NMR spectrum of compound **5la** (CDCl<sub>3</sub>, 100 MHz)

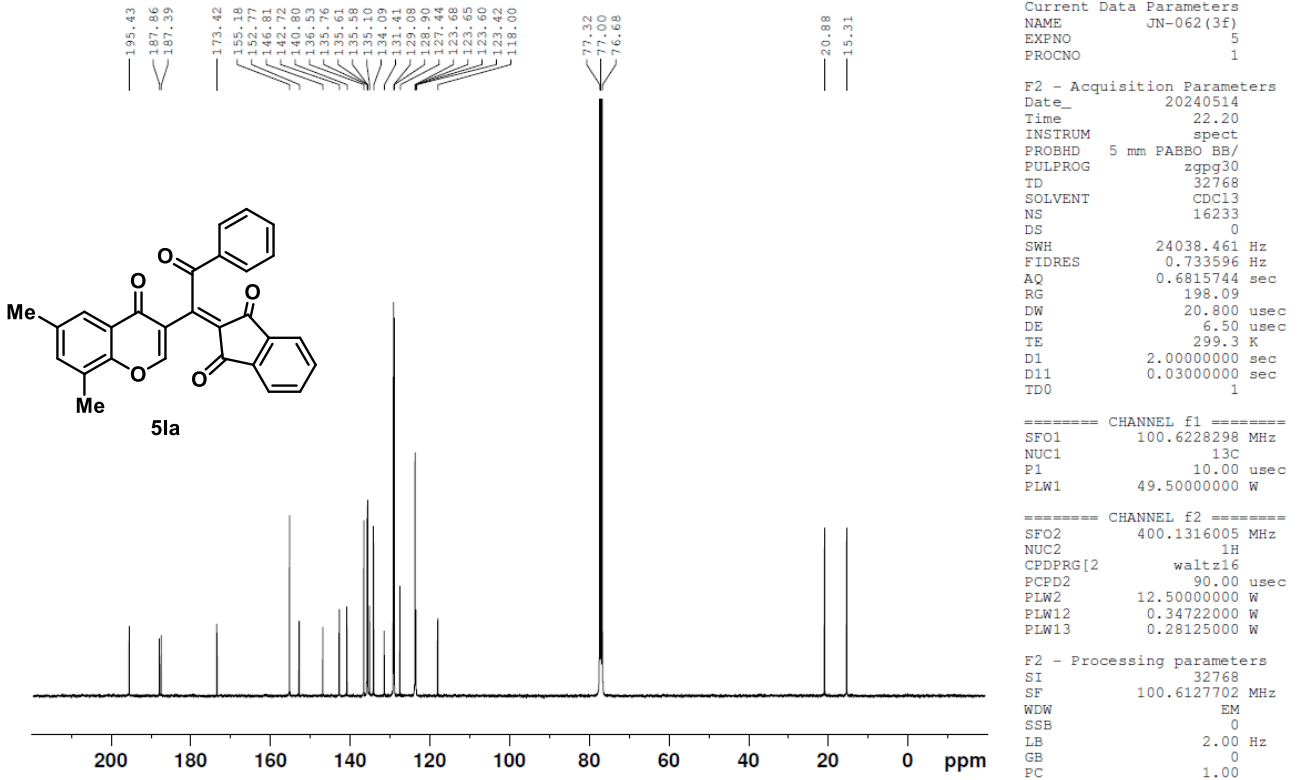

<sup>1</sup>H NMR spectrum of compound 5ma (CDCl<sub>3</sub>, 400 MHz)

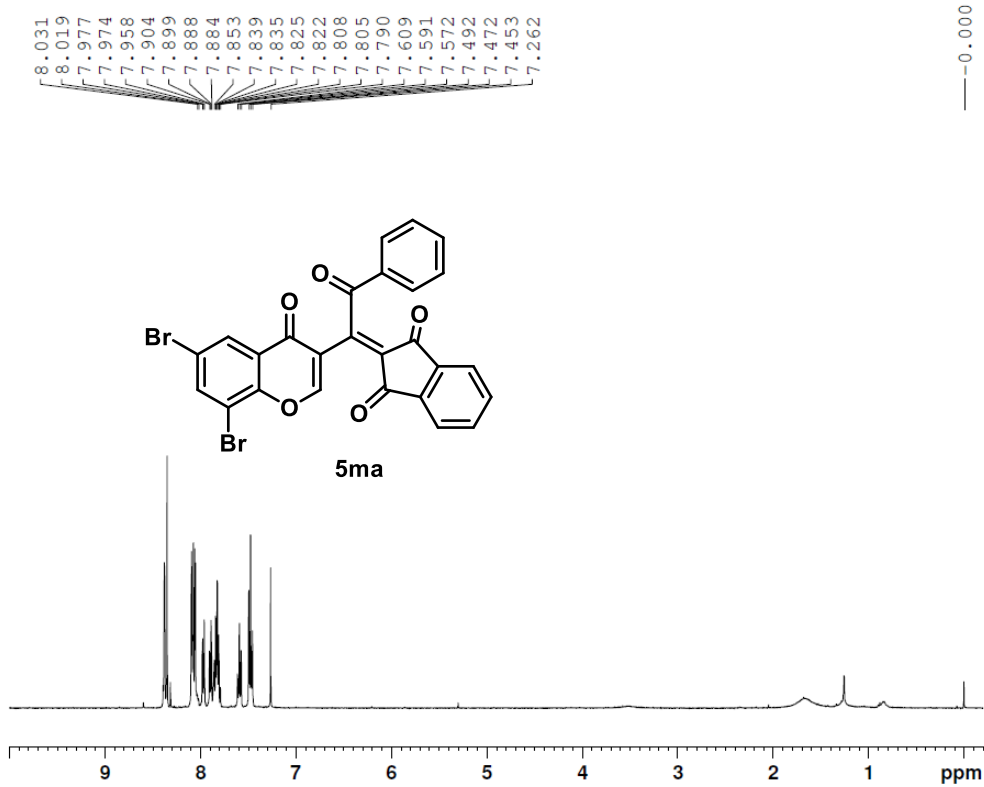

<sup>13</sup>C NMR spectrum of compound 5ma (CDCl<sub>3</sub>, 100 MHz)

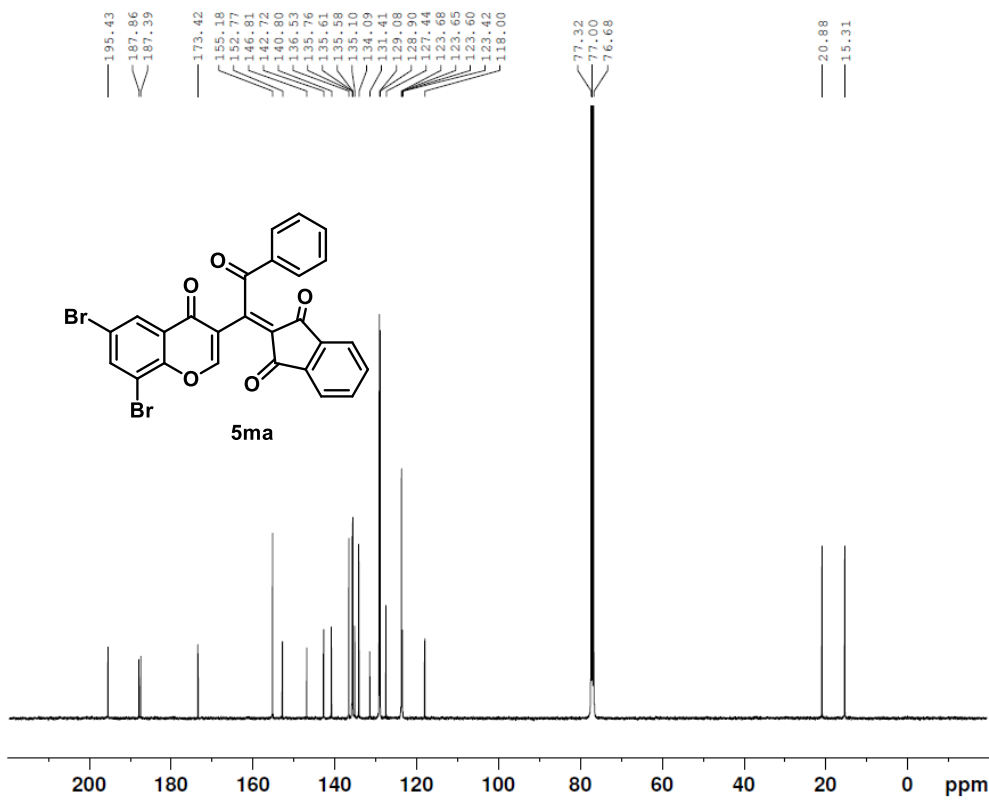



<sup>1</sup>H NMR spectrum of compound **5oa** (CDCl<sub>3</sub>, 400 MHz)

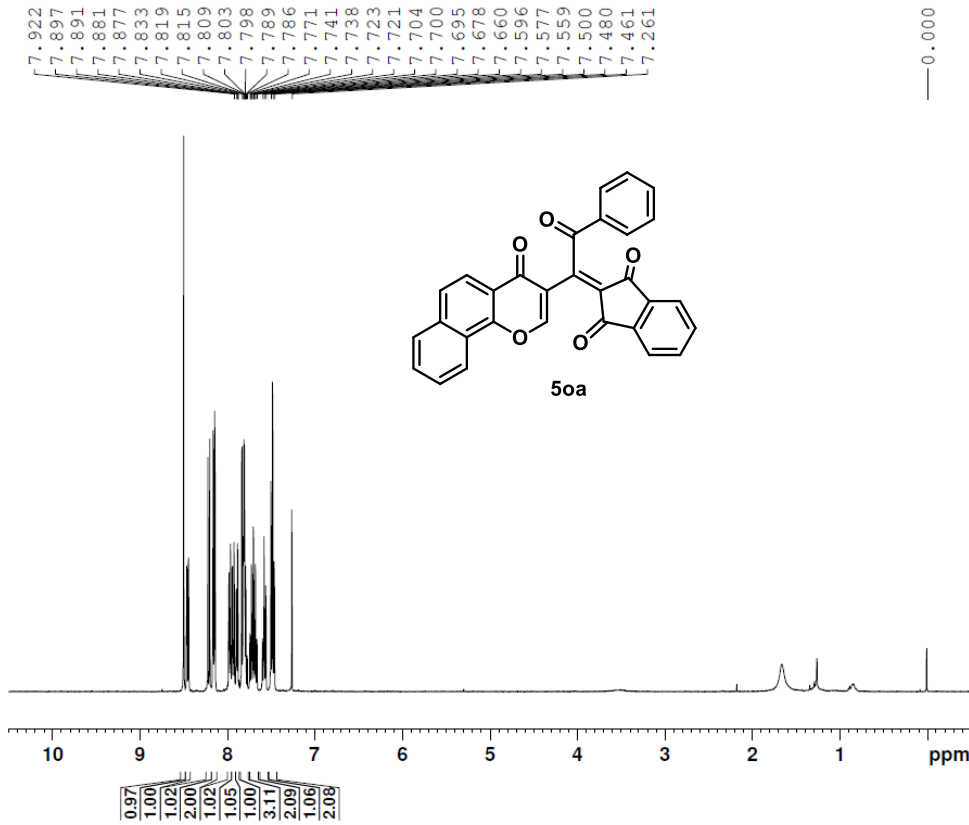

Current Data Parameters  
NAME DP-1283  
EXPNO 1  
PROCNO 1

F2 - Acquisition Parameters  
Date\_ 20240517  
Time 22.12  
INSTRUM spect  
PROBHD 5 mm BBO BB-1H  
PULPROG zg30  
TD 32768  
SOLVENT CDCl3  
NS 16  
DS 0  
SWH 7246.377 Hz  
FIDRES 0.221142 Hz  
AQ 2.2609921 sec  
RG 181  
DW 69.000 usec  
DE 6.50 usec  
TE 295.5 K  
D1 2.0000000 sec  
TD0 1

==== CHANNEL f1 =====  
NUC1 1H  
P1 15.00 usec  
PL1 11.10 dB  
SFO1 400.1324008 MHz

F2 - Processing parameters  
SI 16384  
SF 400.1300092 MHz  
WDW EM  
SSB 0  
LB 0 Hz  
GB 0  
PC 1.00

<sup>13</sup>C NMR spectrum of compound **5oa** (CDCl<sub>3</sub>, 100 MHz)

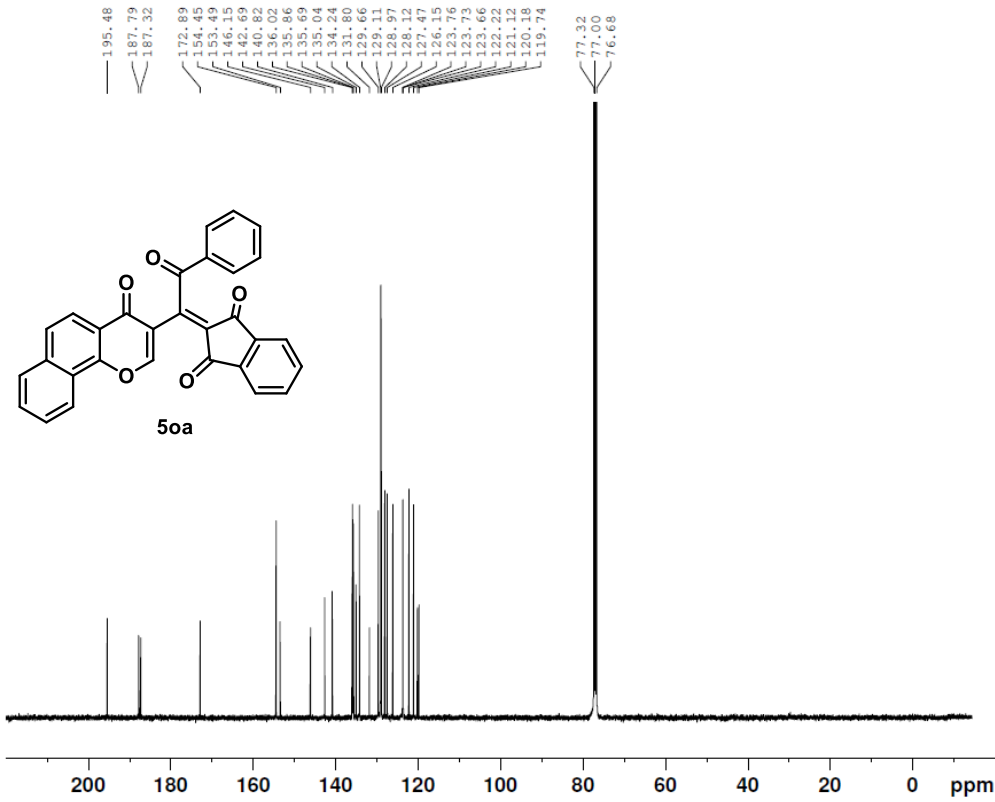

Current Data Parameters  
NAME DP-1283  
EXPNO 2  
PROCNO 1

F2 - Acquisition Parameters  
Date\_ 20240518  
Time 9.16  
INSTRUM spect  
PROBHD 5 mm BBO BB-1H  
PULPROG zgpg30  
TD 32768  
SOLVENT CDCl3  
NS 14483  
DS 0  
SWH 24038.461 Hz  
FIDRES 0.733596 Hz  
AQ 0.6815744 sec  
RG 4096  
DW 20.800 usec  
DE 6.50 usec  
TE 296.8 K  
D1 2.0000000 sec  
D11 0.0300000 sec  
TD0 1

==== CHANNEL f1 =====  
NUC1 13C  
P1 10.00 usec  
PL1 4.20 dB  
SFO1 100.6233325 MHz

==== CHANNEL f2 =====  
CPDPRG[2] waltz16  
NUC2 1H  
PCPD2 90.00 usec  
PL2 10.20 dB  
PL12 26.00 dB  
PL13 29.00 dB  
SFO2 400.1316005 MHz

F2 - Processing parameters  
SI 32768  
SF 100.6127716 MHz  
WDW EM  
SSB 0  
LB 1.00 Hz  
GB 0  
PC 1.00



<sup>1</sup>H NMR spectrum of compound **5ab** (CDCl<sub>3</sub>, 400 MHz)

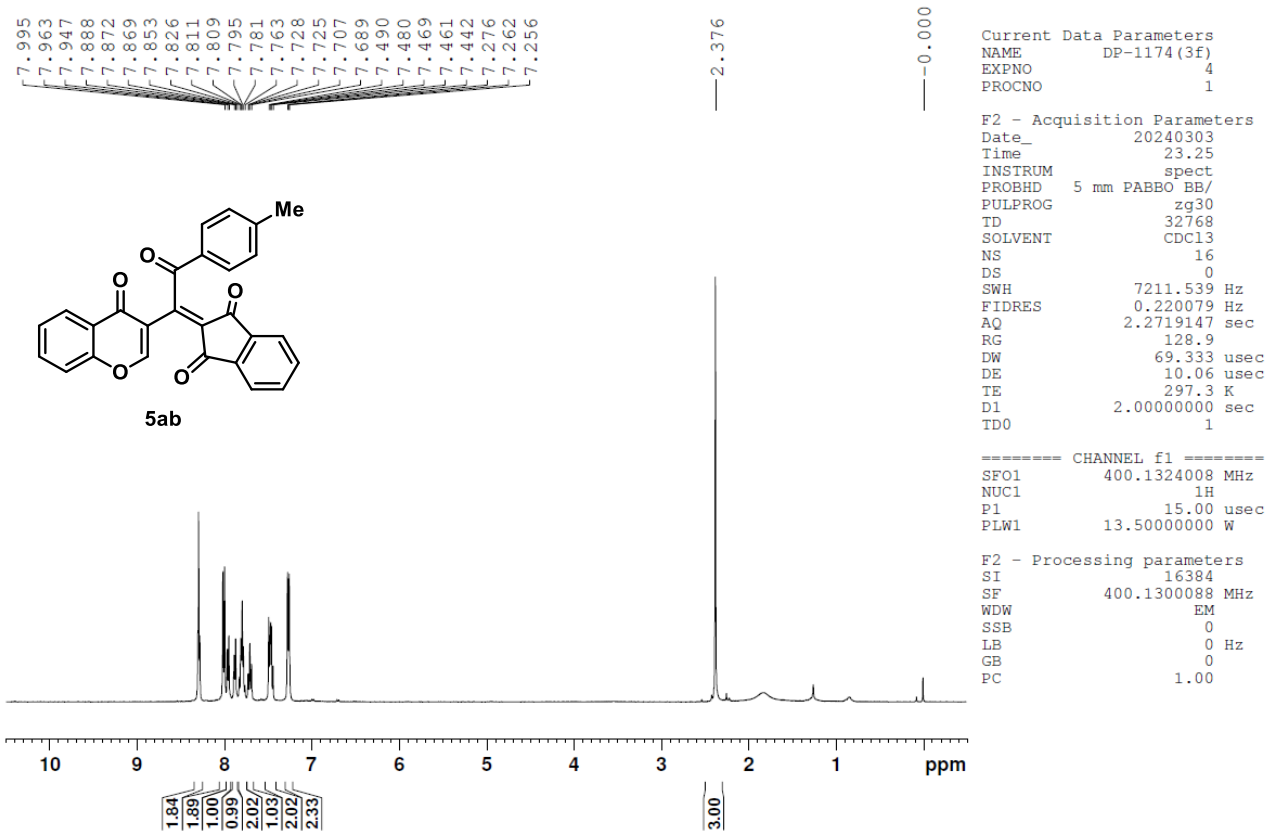

<sup>13</sup>C NMR spectrum of compound **5ab** (CDCl<sub>3</sub>, 100 MHz)

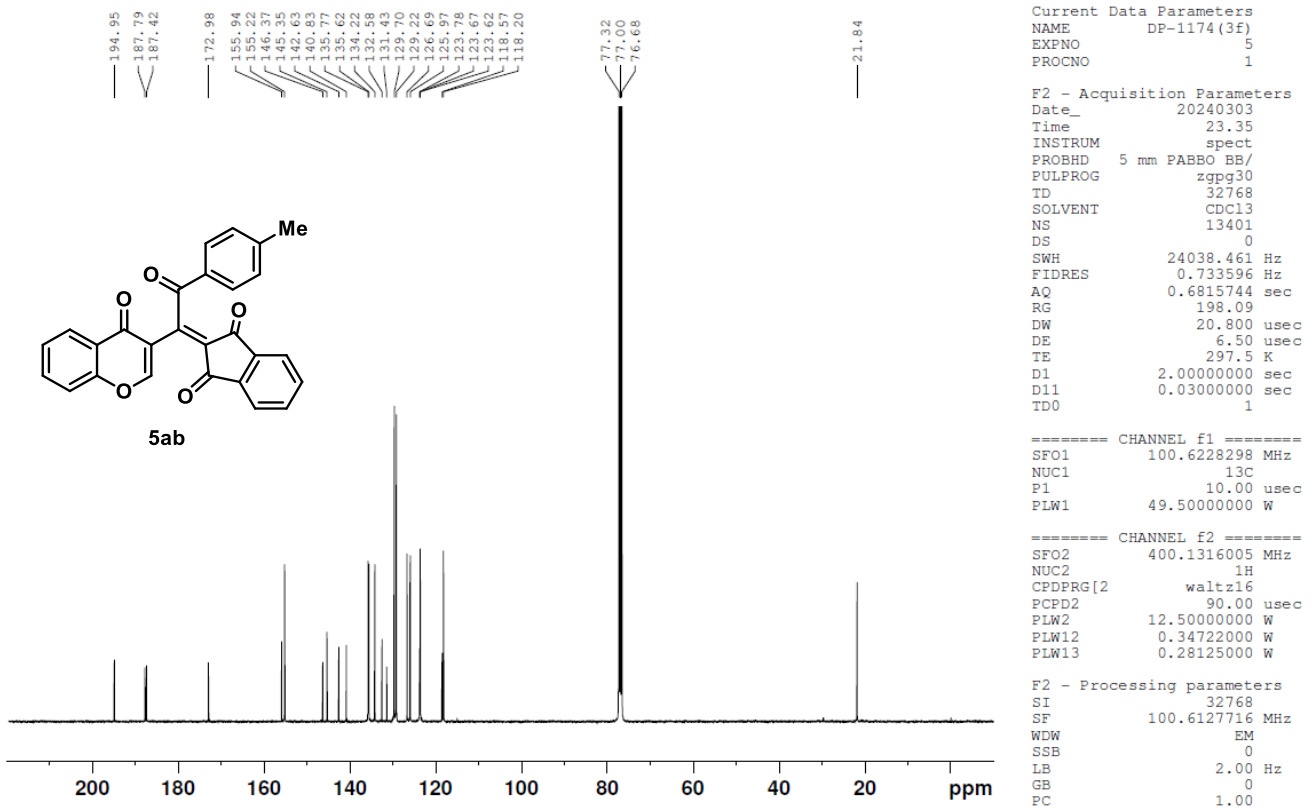

<sup>13</sup>C NMR spectrum of compound **5ac** (CDCl<sub>3</sub>, 400 MHz)

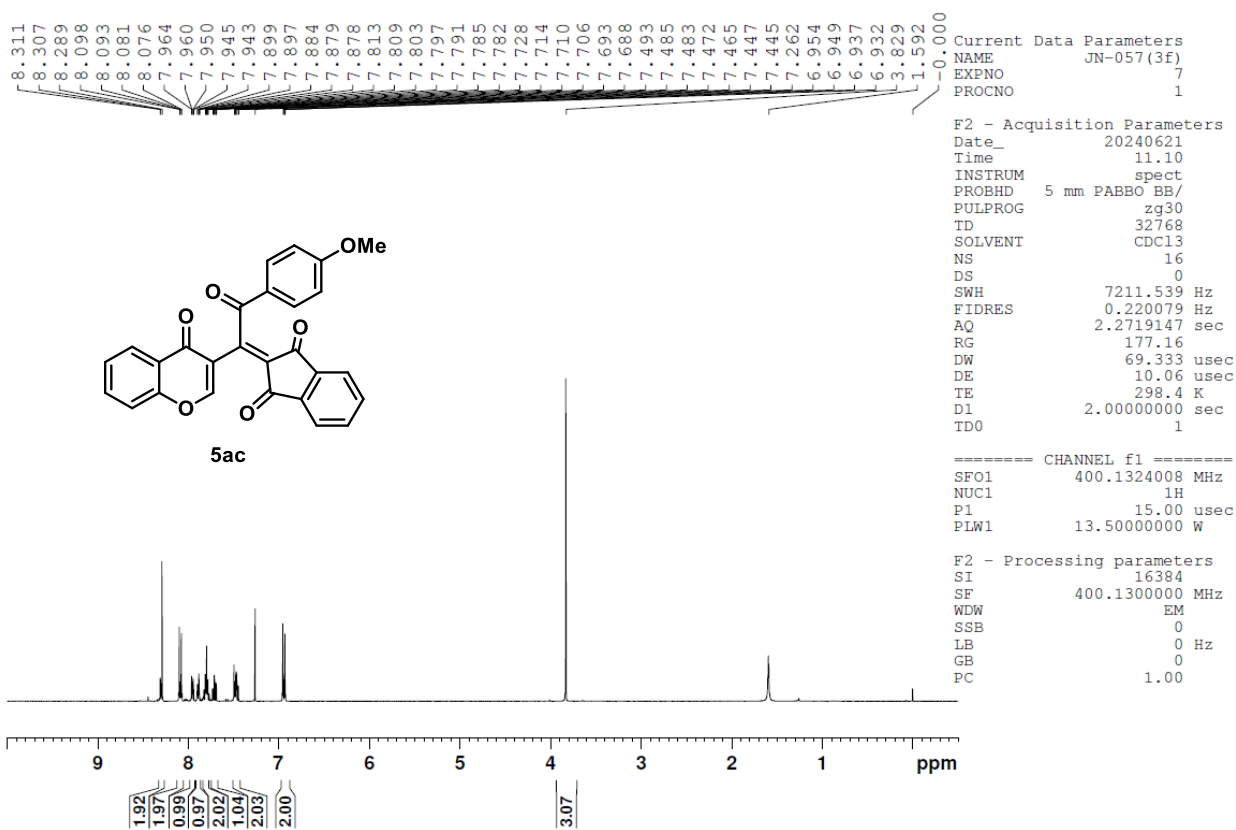

<sup>13</sup>C NMR spectrum of compound **5ac** (CDCl<sub>3</sub>, 100 MHz)

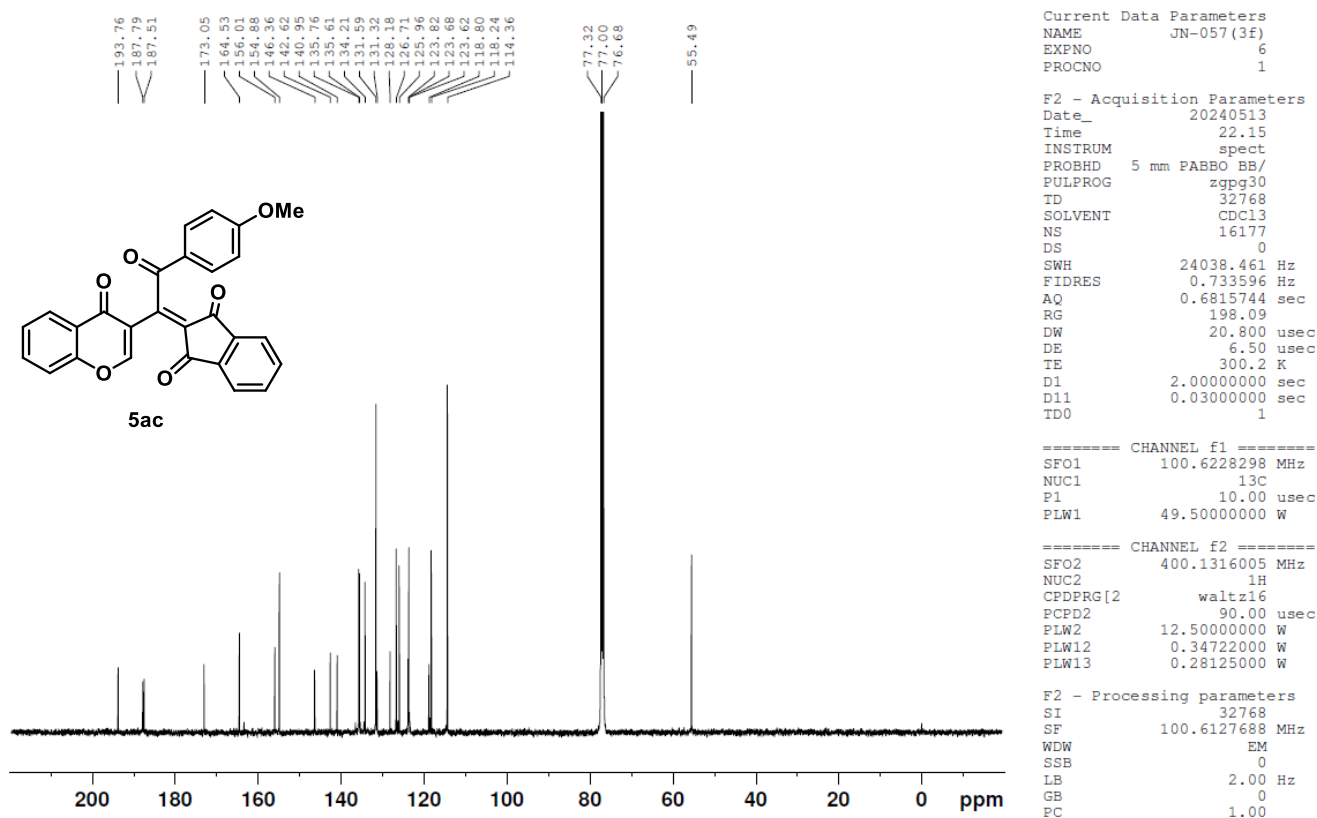

<sup>1</sup>H NMR spectrum of compound 5ad (CDCl<sub>3</sub>, 400 MHz)

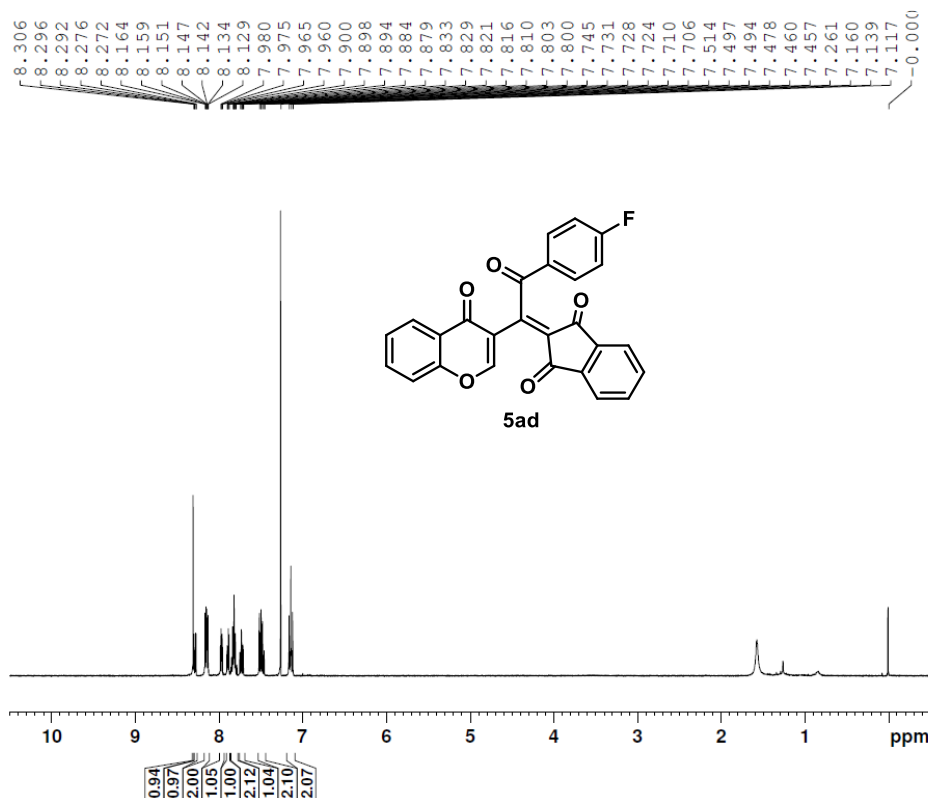

Current Data Parameters  
NAME DP-1161(3f)  
EXPNO 9  
PROCNO 1

F2 - Acquisition Parameters  
Date\_ 20240527  
Time 11.00  
INSTRUM spect  
PROBHD 5 mm PABBO BB/  
PULPROG zg30  
TD 32768  
SOLVENT CDCl3  
NS 16  
DS 0  
SWH 7211.539 Hz  
FIDRES 0.220079 Hz  
AQ 2.2719147 sec  
RG 198.09  
DW 69.333 usec  
DE 10.06 usec  
TE 297.8 K  
D1 2.00000000 sec  
TD0 1

===== CHANNEL f1 =====  
SFO1 400.1324008 MHz  
NUC1 1H  
P1 15.00 usec  
PLW1 13.50000000 W

F2 - Processing parameters  
SI 16384  
SF 400.1300093 MHz  
WDW EM  
SSB 0  
LB 0 Hz  
GB 0  
PC 1.00

<sup>13</sup>C NMR spectrum of compound 5ad (CDCl<sub>3</sub>, 100 MHz)

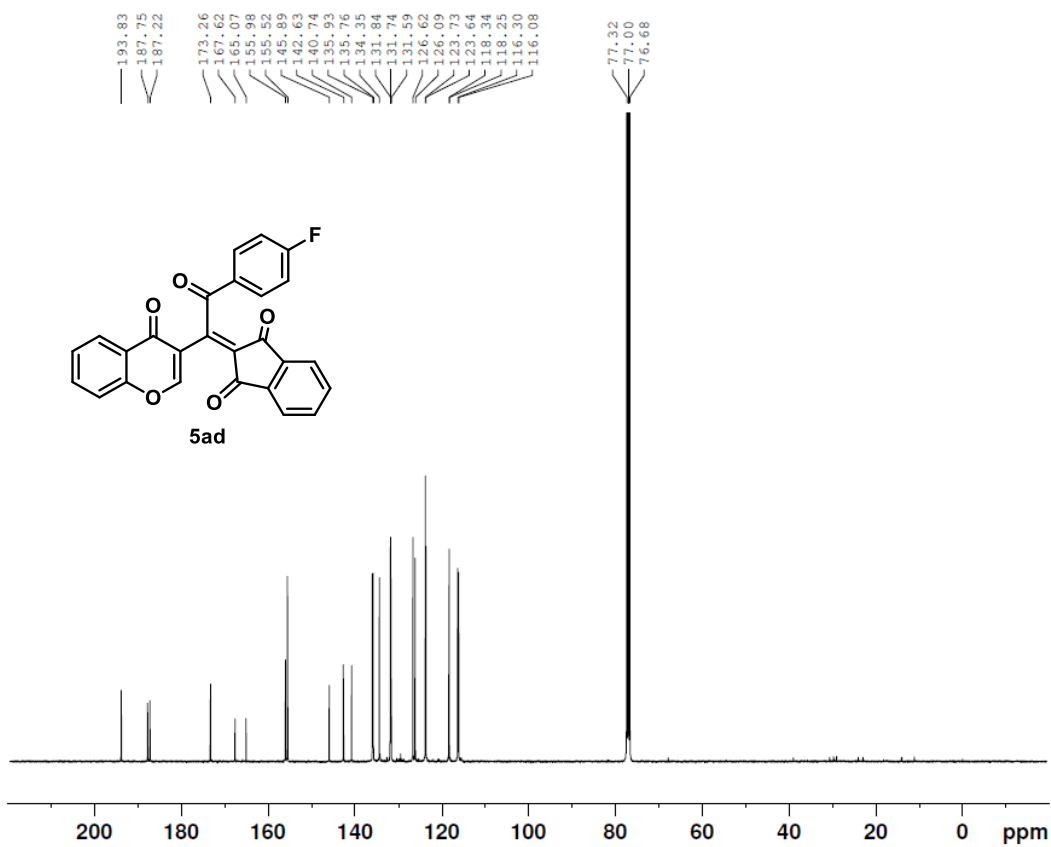

Current Data Parameters  
NAME DP-1161(3f)  
EXPNO 7  
PROCNO 1

F2 - Acquisition Parameters  
Date\_ 20240511  
Time 23.52  
INSTRUM spect  
PROBHD 5 mm PABBO BB/  
PULPROG zgpg30  
TD 32768  
SOLVENT CDCl3  
NS 20000  
DS 0  
SWH 24038.461 Hz  
FIDRES 0.733596 Hz  
AQ 0.6815744 sec  
RG 198.09  
DW 20.800 usec  
DE 6.50 usec  
TE 299.3 K  
D1 2.00000000 sec  
D11 0.03000000 sec  
TD0 1

===== CHANNEL f1 =====  
SFO1 100.6228298 MHz  
NUC1 13C  
P1 10.00 usec  
PLW1 49.50000000 W

===== CHANNEL f2 =====  
SFO2 400.1316005 MHz  
NUC2 1H  
CPDPRG[2] waltz16  
PCPD2 90.00 usec  
PLW2 12.50000000 W  
PLW12 0.34722000 W  
PLW13 0.28125000 W

F2 - Processing parameters  
SI 32768  
SF 100.6127715 MHz  
WDW EM  
SSB 0  
LB 2.00 Hz  
GB 0  
PC 1.00

<sup>19</sup>F NMR spectrum of compound **5ad** (CDCl<sub>3</sub>, 376 MHz)

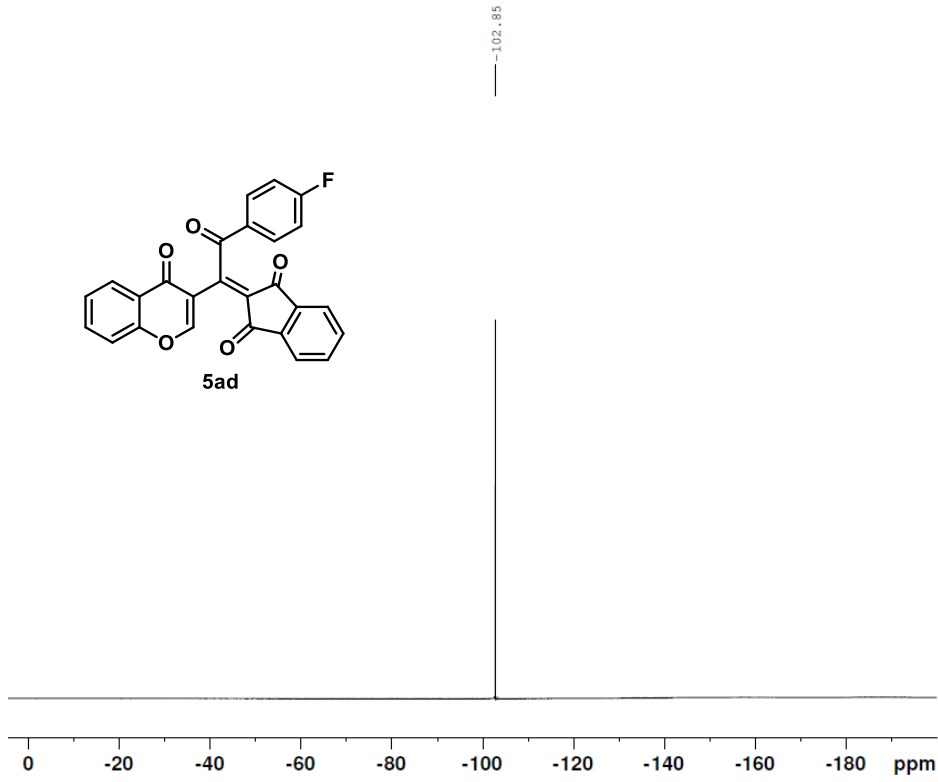

```
Current Data Parameters
NAME      DP-1161(3f)
EXPNO     10
PROCNO    1

F2 - Acquisition Parameters
Date_     20240621
Time      10.50
INSTRUM   spect
PROBHD    5 mm PABBO BB/
PULPROG   zgig
TD         131072
SOLVENT   CDCl3
NS         16
DS         0
SWH       89285.711 Hz
FIDRES    0.681196 Hz
AQ         0.7340032 sec
RG         198.09
DW         5.600 usec
DE         6.50 usec
TE         298.8 K
D1         1.00000000 sec
D11        0.03000000 sec
TD0        1

===== CHANNEL f1 =====
SFO1      376.4607168 MHz
NUC1       19F
P1         15.00 usec
PLW1       16.50000000 W

===== CHANNEL f2 =====
SFO2      400.1316005 MHz
NUC2       1H
CPDPRG[2] waltz16
PCPD2     90.00 usec
PLW2      12.50000000 W
PLW12     0.34722000 W

F2 - Processing parameters
SI         65536
SF         376.4983662 MHz
WDW        EM
SSB         0
LB         1.00 Hz
GB         0
PC         1.00
```

<sup>1</sup>H NMR spectrum of compound 5ae (CDCl<sub>3</sub>, 400 MHz)

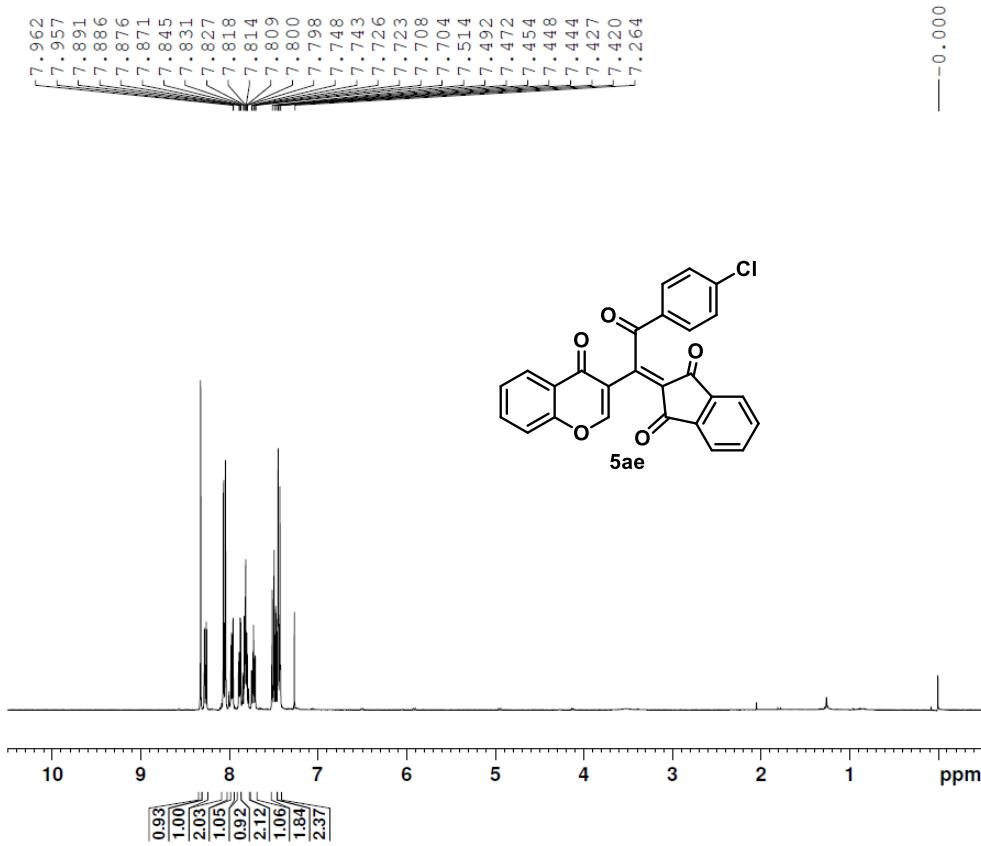

Current Data Parameters  
NAME DP-1167  
EXPNO 1  
PROCNO 1

F2 - Acquisition Parameters  
Date\_ 20240224  
Time 21.08  
INSTRUM spect  
PROBHD 5 mm BBO BB-1H  
PULPROG zg30  
TD 32768  
SOLVENT CDCl3  
NS 16  
DS 0  
SWH 7246.377 Hz  
FIDRES 0.221142 Hz  
AQ 2.2609921 sec  
RG 228.1  
DW 69.000 usec  
DE 6.50 usec  
TE 295.4 K  
D1 2.00000000 sec  
TD0 1

===== CHANNEL f1 =====  
NUC1 1H  
P1 15.00 usec  
PL1 11.10 dB  
SFO1 400.1324008 MHz

F2 - Processing parameters  
SI 16384  
SF 400.1300077 MHz  
WDW EM  
SSB 0  
LB 0 Hz  
GB 0  
PC 1.00

<sup>13</sup>C NMR spectrum of compound 5ae (CDCl<sub>3</sub>, 100 MHz)

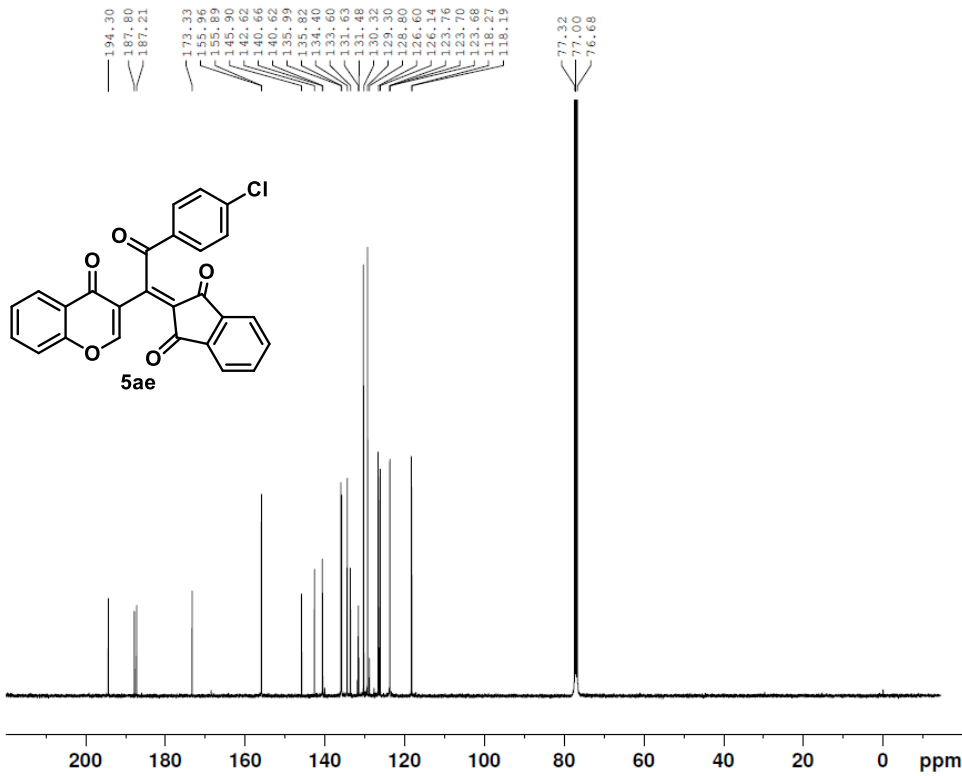

Current Data Parameters  
NAME DP-1167  
EXPNO 2  
PROCNO 1

F2 - Acquisition Parameters  
Date\_ 20240224  
Time 21.11  
INSTRUM spect  
PROBHD 5 mm BBO BB-1H  
PULPROG zgpg30  
TD 32768  
SOLVENT CDCl3  
NS 20000  
DS 0  
SWH 24038.461 Hz  
FIDRES 0.733596 Hz  
AQ 0.6815744 sec  
RG 4096  
DW 20.800 usec  
DE 6.50 usec  
TE 295.8 K  
D1 2.00000000 sec  
D11 0.03000000 sec  
TD0 1

===== CHANNEL f1 =====  
NUC1 13C  
P1 10.00 usec  
PL1 4.20 dB  
SFO1 100.6233325 MHz

===== CHANNEL f2 =====  
CPDPRG[2] waltz16  
NUC2 1H  
PCPD2 90.00 usec  
PL2 10.20 dB  
PL12 26.00 dB  
PL13 29.00 dB  
SFO2 400.1316005 MHz

F2 - Processing parameters  
SI 32768  
SF 100.6127723 MHz  
WDW EM  
SSB 0  
LB 1.00 Hz  
GB 0  
PC 1.00

### <sup>1</sup>H NMR spectrum of compound **5af** (CDCl<sub>3</sub>, 400 MHz)

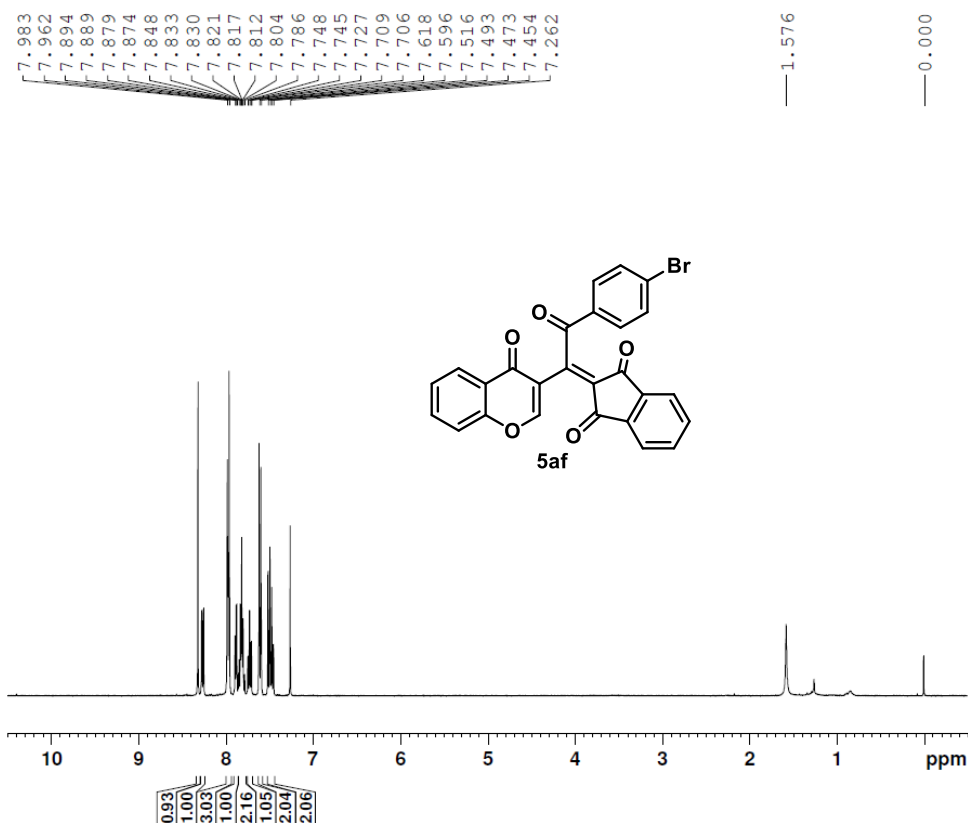

Current Data Parameters  
NAME JN-066(3f)  
EXPNO 2  
PROCNO 1

F2 - Acquisition Parameters  
Date\_ 20240518  
Time 21.13  
INSTRUM spect  
PROBHD 5 mm PABBO BB/  
PULPROG zg30  
TD 32768  
SOLVENT CDCl3  
NS 16  
DS 0  
SWH 7211.539 Hz  
FIDRES 0.220079 Hz  
AQ 2.2719147 sec  
RG 158.74  
DW 69.333 usec  
DE 10.06 usec  
TE 297.7 K  
D1 2.00000000 sec  
TD0 1

===== CHANNEL f1 =====  
SFO1 400.1324008 MHz  
NUC1 1H  
P1 15.00 usec  
PLW1 13.50000000 W

F2 - Processing parameters  
SI 16384  
SF 400.1300093 MHz  
WDW EM  
SSB 0  
LB 0 Hz  
GB 0  
PC 1.00

### <sup>13</sup>C NMR spectrum of compound **5af** (CDCl<sub>3</sub>, 100 MHz)

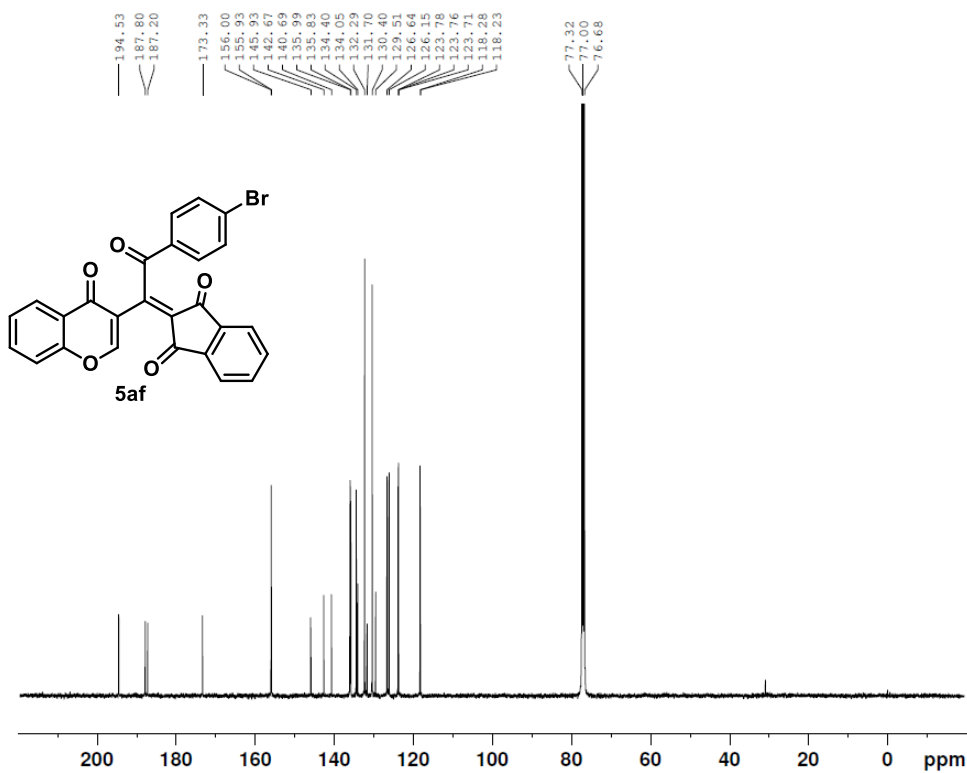

Current Data Parameters  
NAME JN-066(3f)  
EXPNO 3  
PROCNO 1

F2 - Acquisition Parameters  
Date\_ 20240518  
Time 21.15  
INSTRUM spect  
PROBHD 5 mm PABBO BB/  
PULPROG zgpg30  
TD 32768  
SOLVENT CDCl3  
NS 24240  
DS 0  
SWH 24038.461 Hz  
FIDRES 0.733596 Hz  
AQ 0.6815744 sec  
RG 198.09  
DW 20.800 usec  
DE 6.50 usec  
TE 297.8 K  
D1 2.00000000 sec  
D11 0.03000000 sec  
TD0 1

===== CHANNEL f1 =====  
SFO1 100.6228298 MHz  
NUC1 13C  
P1 10.00 usec  
PLW1 49.50000000 W

===== CHANNEL f2 =====  
SFO2 400.1316005 MHz  
NUC2 1H  
CPDPRG[2] waltz16  
PCPD2 90.00 usec  
PLW2 12.50000000 W  
PLW12 0.34722000 W  
PLW13 0.28125000 W

F2 - Processing parameters  
SI 32768  
SF 100.6127695 MHz  
WDW EM  
SSB 0  
LB 2.00 Hz  
GB 0  
PC 1.00

**<sup>1</sup>H NMR spectrum of compound 5ag (CDCl<sub>3</sub>, 400 MHz)**

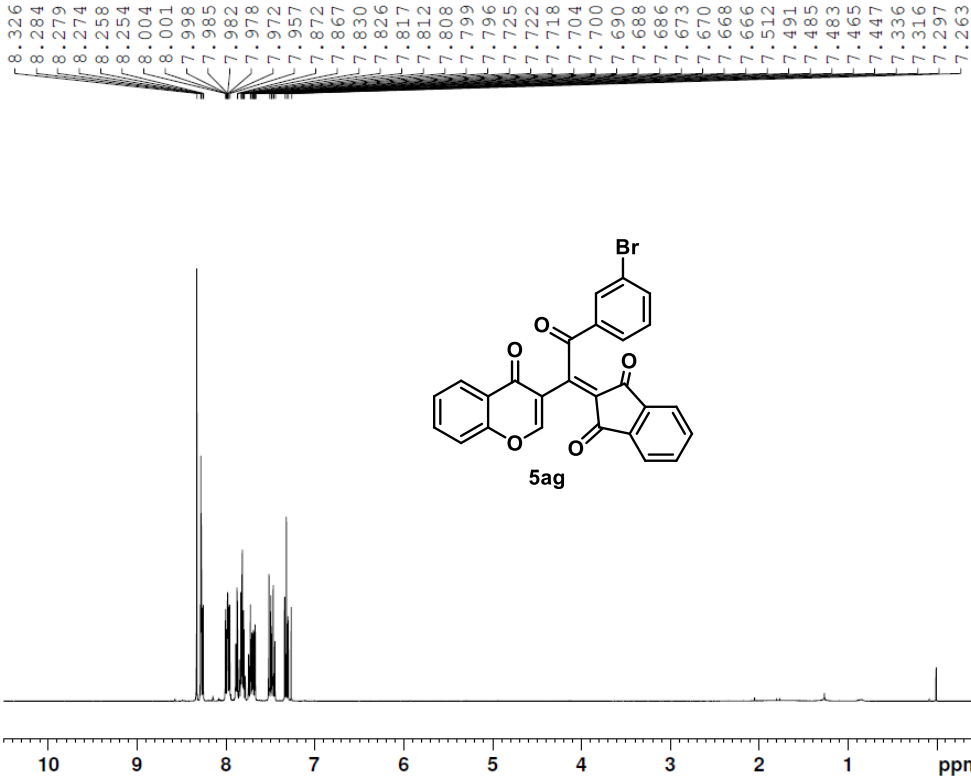

Current Data Parameters  
NAME DP-1164(3f)  
EXPNO 3  
PROCNO 1

F2 - Acquisition Parameters  
Date\_ 20240223  
Time 21.58  
INSTRUM spect  
PROBHD 5 mm PABBO BB/  
PULPROG zg30  
TD 32768  
SOLVENT CDCl3  
NS 16  
DS 0  
SWH 7211.539 Hz  
FIDRES 0.220079 Hz  
AQ 2.2719147 sec  
RG 113.31  
DW 69.333 usec  
DE 10.06 usec  
TE 298.3 K  
D1 2.00000000 sec  
TD0 1

===== CHANNEL f1 =====  
SFO1 400.1324008 MHz  
NUC1 1H  
P1 15.00 usec  
PLW1 13.50000000 W

F2 - Processing parameters  
SI 16384  
SF 400.1300084 MHz  
WDW EM  
SSB 0  
LB 0 Hz  
GB 0  
PC 1.00

**<sup>13</sup>C NMR spectrum of compound 5ag (CDCl<sub>3</sub>, 100 MHz)**

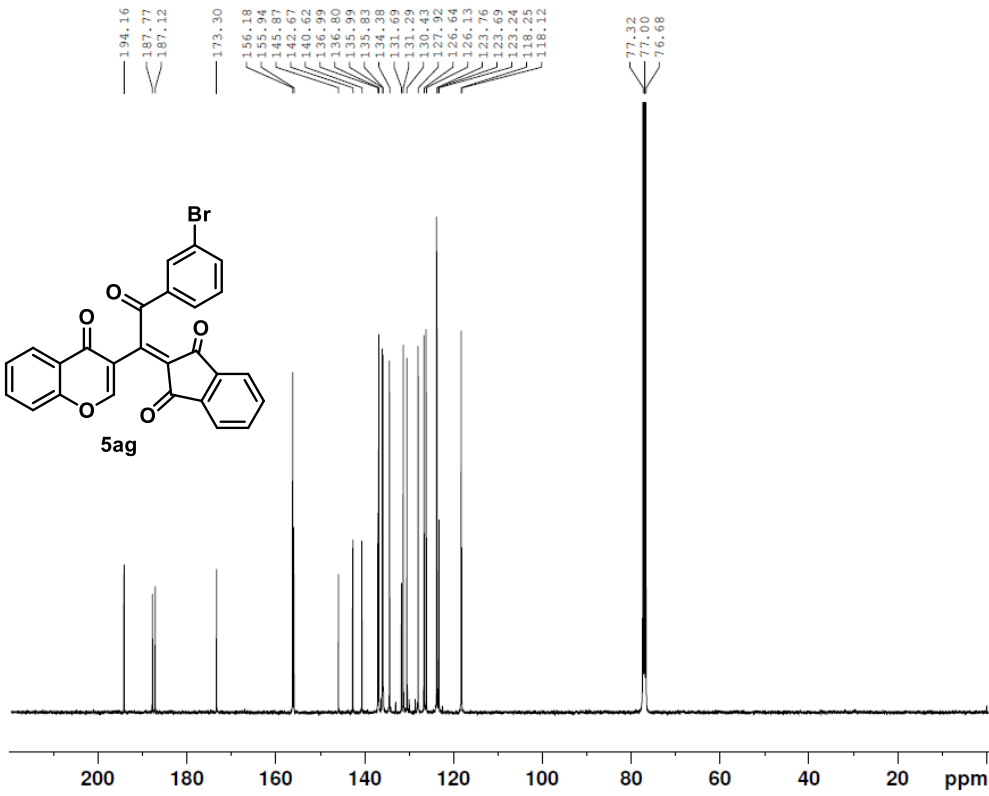

Current Data Parameters  
NAME DP-1164(3f)  
EXPNO 4  
PROCNO 1

F2 - Acquisition Parameters  
Date\_ 20240223  
Time 22.00  
INSTRUM spect  
PROBHD 5 mm PABBO BB/  
PULPROG zgpg30  
TD 32768  
SOLVENT CDCl3  
NS 13499  
DS 0  
SWH 24038.461 Hz  
FIDRES 0.733596 Hz  
AQ 0.6815744 sec  
RG 198.09  
DW 20.800 usec  
DE 6.50 usec  
TE 298.6 K  
D1 2.00000000 sec  
D11 0.03000000 sec  
TD0 1

===== CHANNEL f1 =====  
SFO1 100.6228298 MHz  
NUC1 13C  
P1 10.00 usec  
PLW1 49.50000000 W

===== CHANNEL f2 =====  
SFO2 400.1316005 MHz  
NUC2 1H  
CPDPRG[2] waltz16  
PCPD2 90.00 usec  
PLW2 12.50000000 W  
PLW12 0.34722000 W  
PLW13 0.28125000 W

F2 - Processing parameters  
SI 32768  
SF 100.6127720 MHz  
WDW EM  
SSB 0  
LB 2.00 Hz  
GB 0  
PC 1.00

### <sup>1</sup>H NMR spectrum of compound **5ah** (CDCl<sub>3</sub>, 400 MHz)

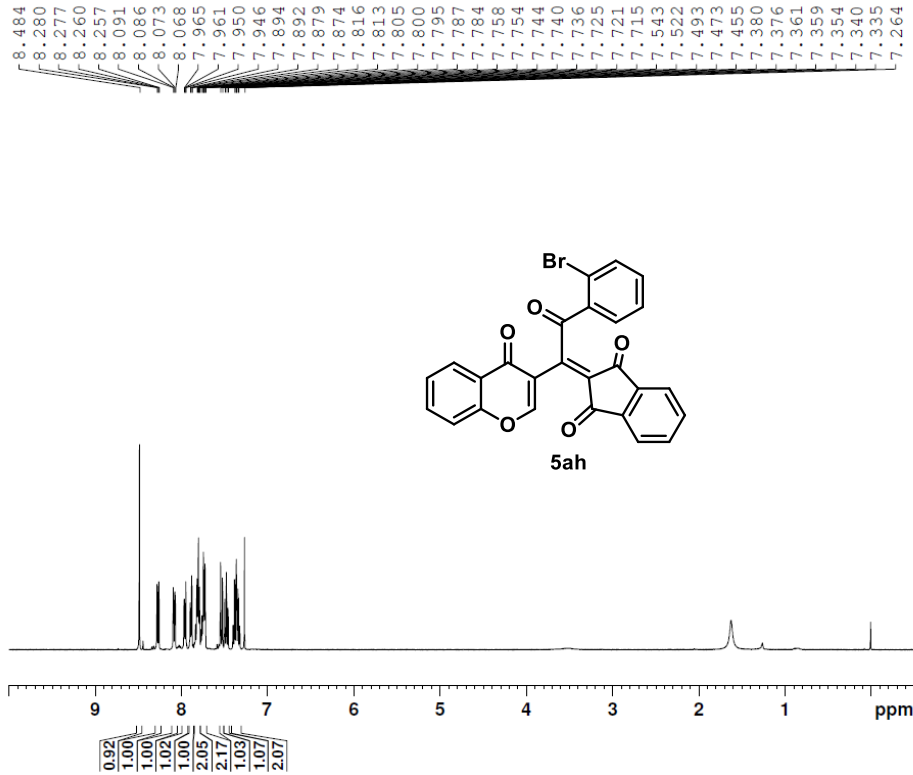

### <sup>13</sup>C NMR spectrum of compound **5ah** (CDCl<sub>3</sub>, 100 MHz)

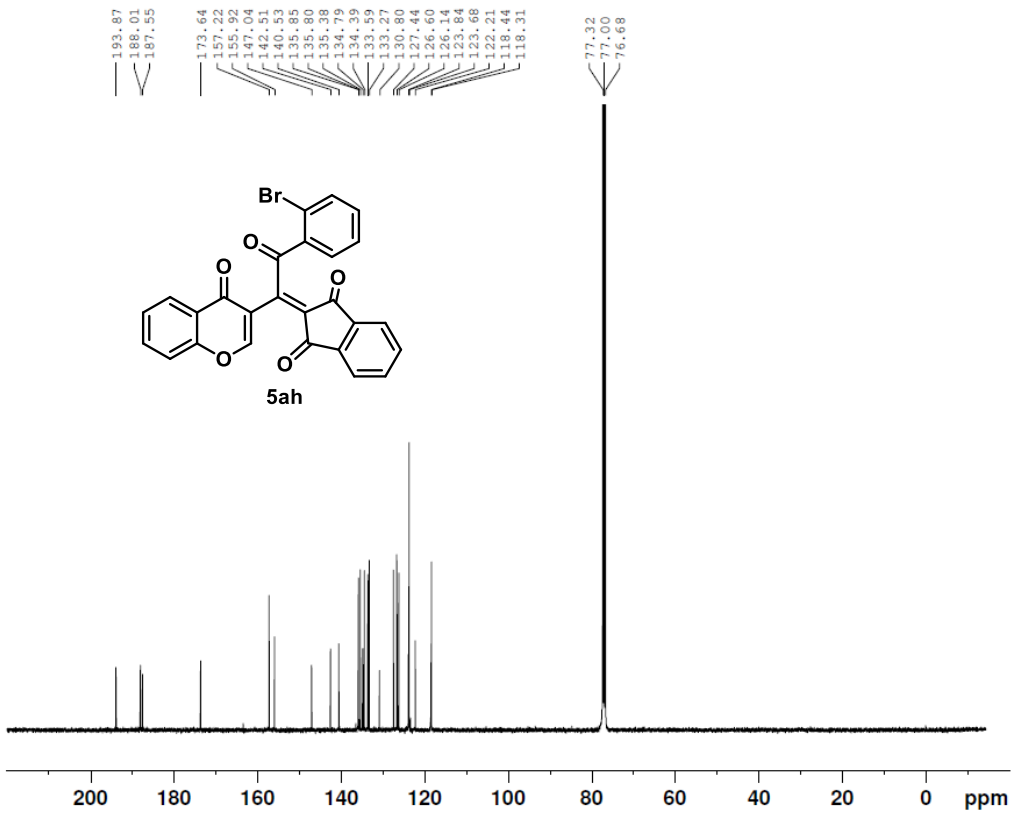



<sup>1</sup>H NMR spectrum of compound 5ai (CDCl<sub>3</sub>, 400 MHz)

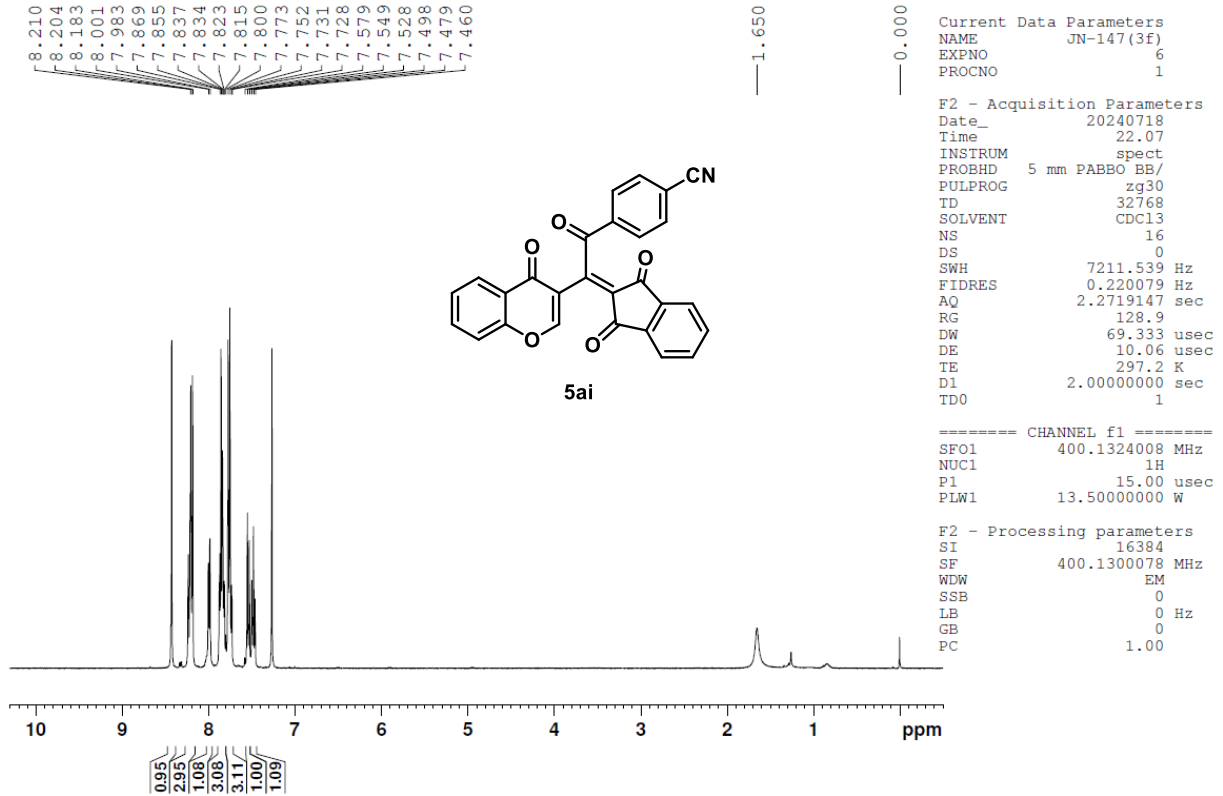

<sup>13</sup>C NMR spectrum of compound 5ai (CDCl<sub>3</sub>, 100 MHz)

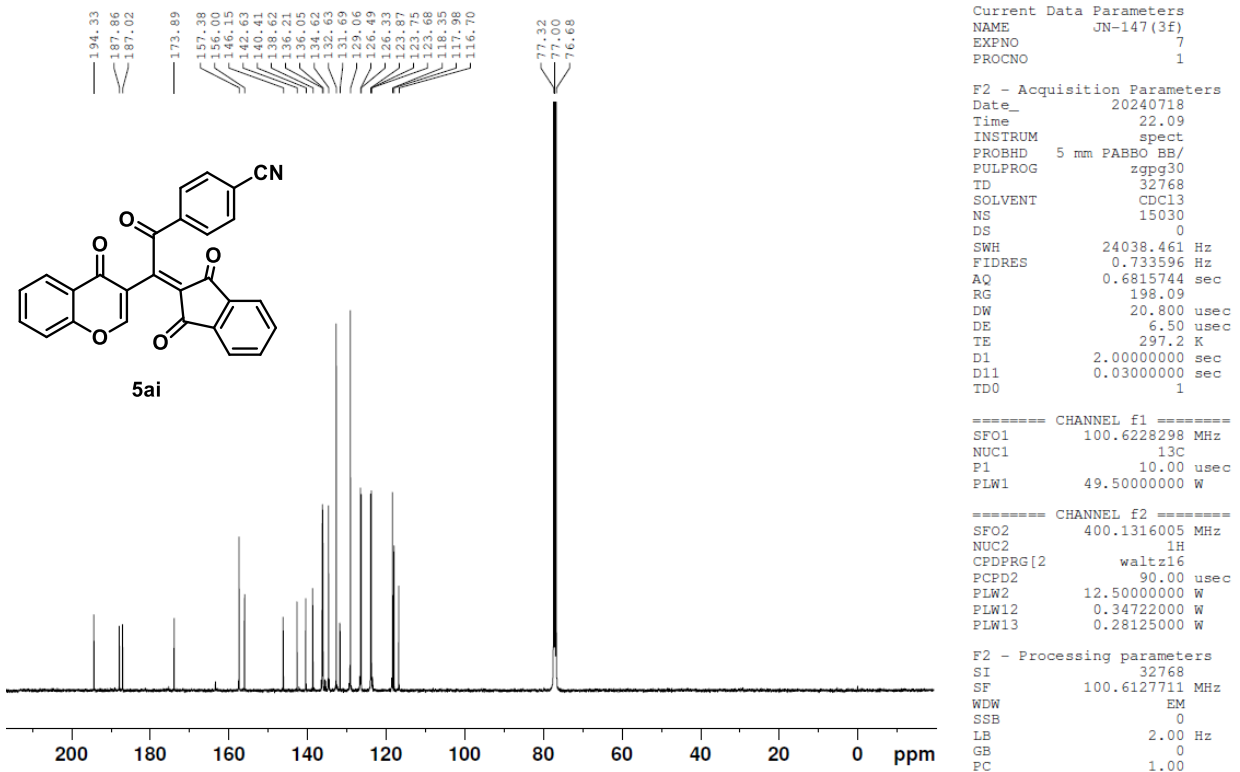

<sup>1</sup>H NMR spectrum of compound 5aj (CDCl<sub>3</sub>, 400 MHz)

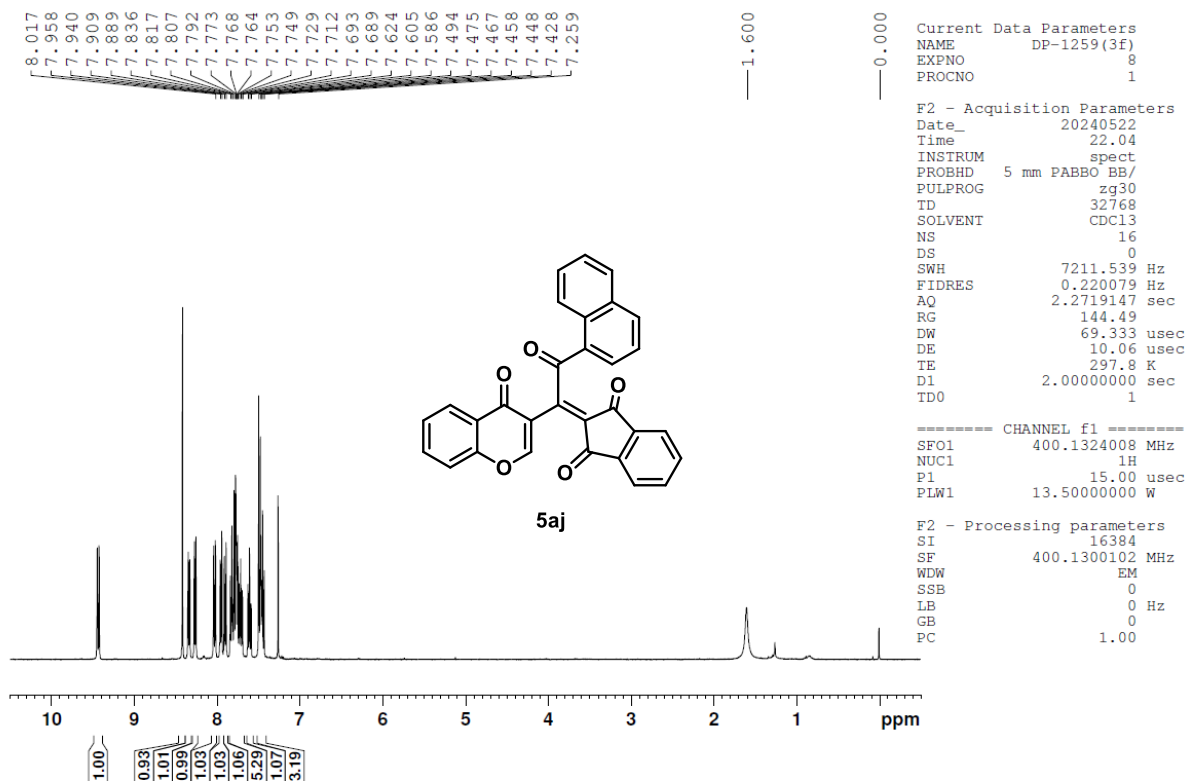

<sup>13</sup>C NMR spectrum of compound 5aj (CDCl<sub>3</sub>, 100 MHz)

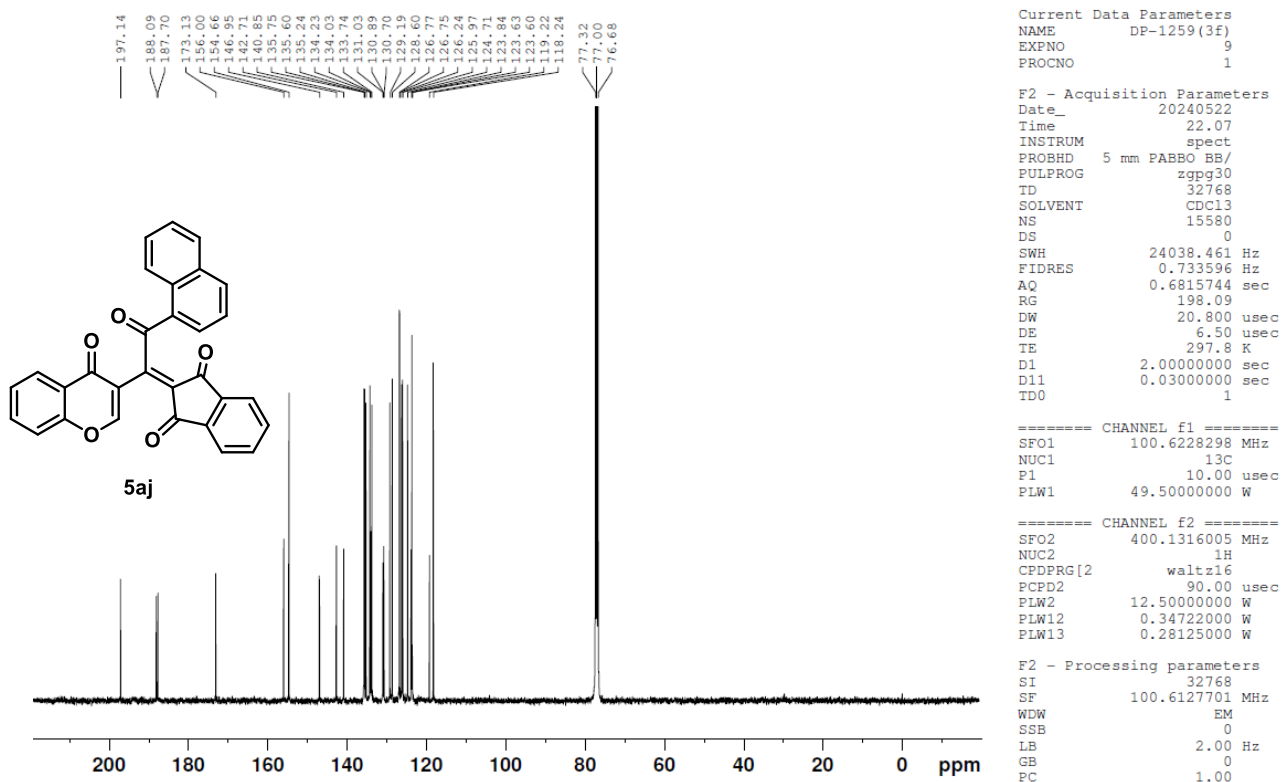

<sup>1</sup>H NMR spectrum of compound 5ak (CDCl<sub>3</sub>, 400 MHz)

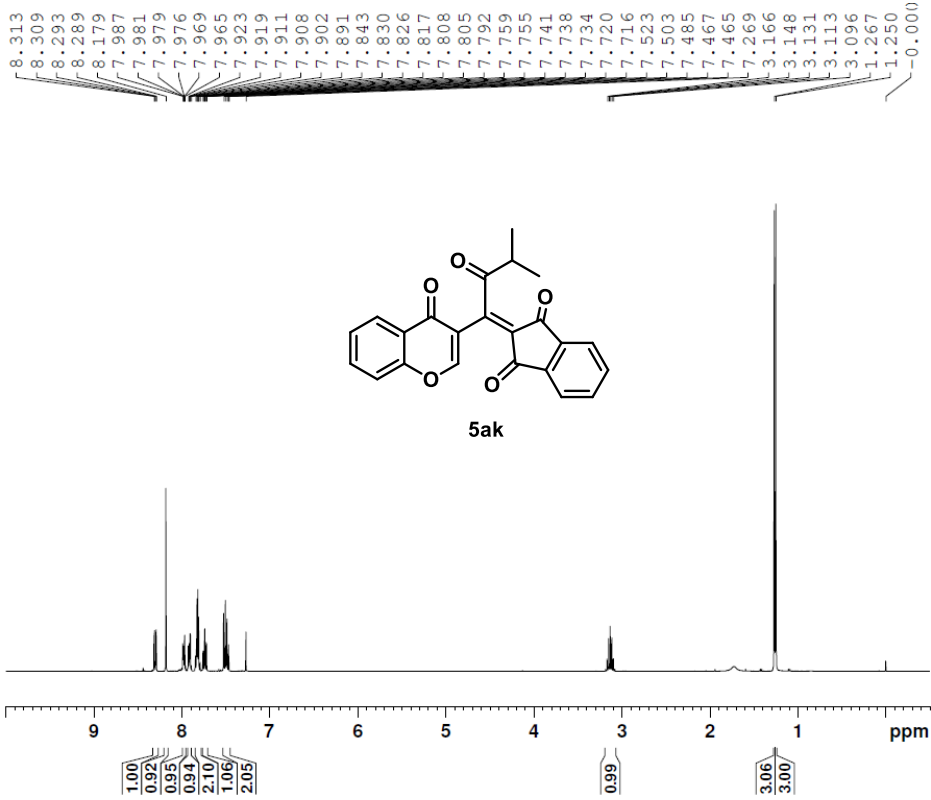

Current Data Parameters  
NAME DP-1166(3f)  
EXPNO 4  
PROCNO 1

F2 - Acquisition Parameters  
Date\_ 20240511  
Time 21.10  
INSTRUM spect  
PROBHD 5 mm PABBO BB/  
PULPROG zg30  
TD 32768  
SOLVENT CDCl3  
NS 16  
DS 0  
SWH 7211.539 Hz  
FIDRES 0.220079 Hz  
AQ 2.2719147 sec  
RG 99.72  
DW 69.333 usec  
DE 10.06 usec  
TE 298.5 K  
D1 2.00000000 sec  
TD0 1

==== CHANNEL f1 =====  
SFO1 400.1324008 MHz  
NUC1 1H  
P1 15.00 usec  
PLW1 13.50000000 W

F2 - Processing parameters  
SI 16384  
SF 400.1300060 MHz  
WDW EM  
SSB 0  
LB 0 Hz  
GB 0  
PC 1.00

<sup>13</sup>C NMR spectrum of compound 5ak (CDCl<sub>3</sub>, 100 MHz)

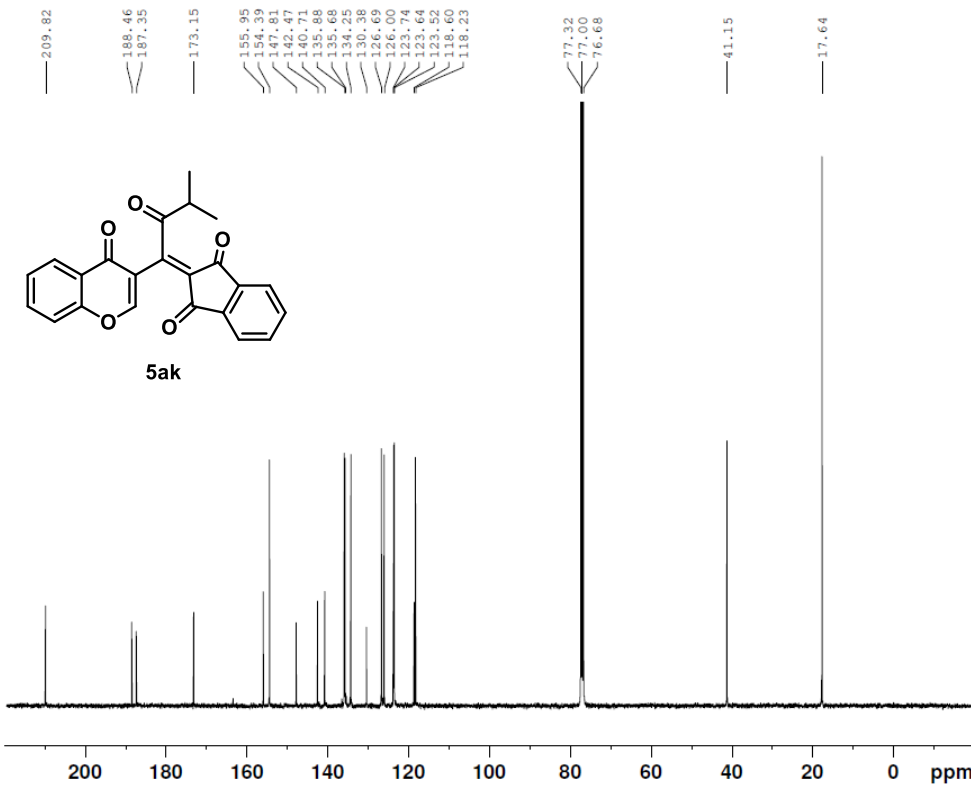

Current Data Parameters  
NAME DP-1166(3f)  
EXPNO 5  
PROCNO 1

F2 - Acquisition Parameters  
Date\_ 20240511  
Time 21.12  
INSTRUM spect  
PROBHD 5 mm PABBO BB/  
PULPROG zgpg30  
TD 32768  
SOLVENT CDCl3  
NS 3408  
DS 0  
SWH 24038.461 Hz  
FIDRES 0.733596 Hz  
AQ 0.6815744 sec  
RG 198.09  
DW 20.800 usec  
DE 6.50 usec  
TE 298.8 K  
D1 2.00000000 sec  
D11 0.03000000 sec  
TD0 1

==== CHANNEL f1 =====  
SFO1 100.6228298 MHz  
NUC1 13C  
P1 10.00 usec  
PLW1 49.50000000 W

==== CHANNEL f2 =====  
SFO2 400.1316005 MHz  
NUC2 1H  
CPDPRG[2] waltz16  
PCPD2 90.00 usec  
PLW2 12.50000000 W  
PLW12 0.34722000 W  
PLW13 0.28125000 W

F2 - Processing parameters  
SI 32768  
SF 100.6127709 MHz  
WDW EM  
SSB 0  
LB 2.00 Hz  
GB 0  
PC 1.00

<sup>1</sup>H NMR spectrum of compound 4 (CDCl<sub>3</sub>, 400 MHz)

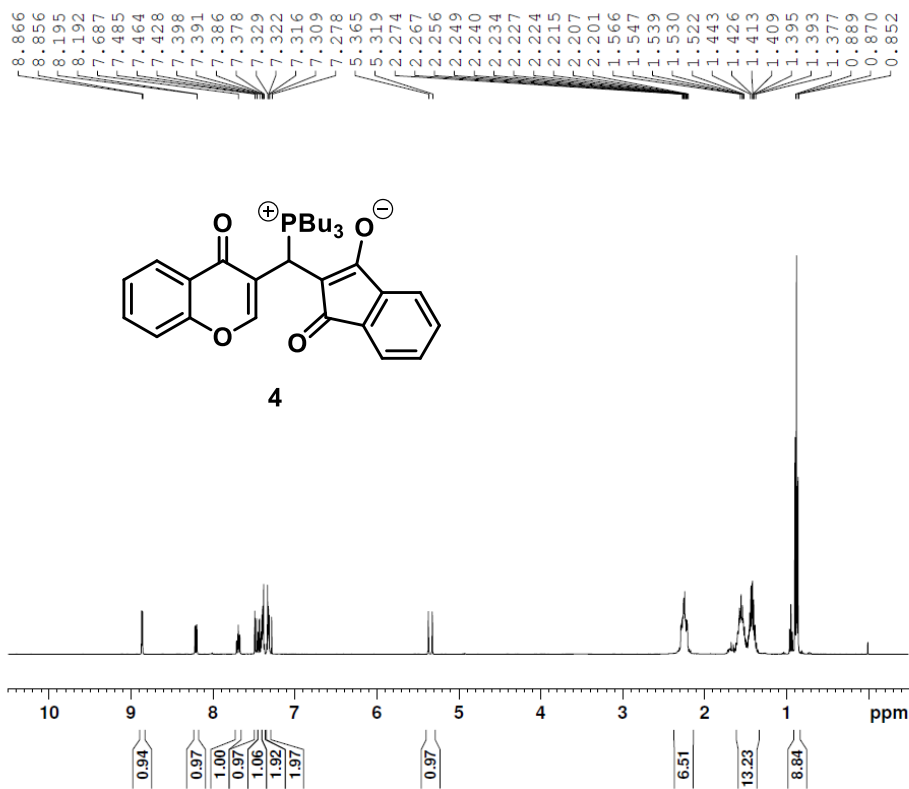

Current Data Parameters  
 NAME DP-1037  
 EXPNO 6  
 PROCNO 1

F2 - Acquisition Parameters  
 Date\_ 20240303  
 Time 23.45  
 INSTRUM spect  
 PROBHD 5 mm BBO BB-1H  
 PULPROG zg30  
 TD 32768  
 SOLVENT CDCl3  
 NS 16  
 DS 0  
 SWH 7246.377 Hz  
 FIDRES 0.221142 Hz  
 AQ 2.2609921 sec  
 RG 114  
 DW 69.000 usec  
 DE 6.50 usec  
 TE 298.2 K  
 D1 2.00000000 sec  
 TD0 1

==== CHANNEL f1 =====  
 NUC1 1H  
 P1 15.00 usec  
 PL1 11.10 dB  
 SFO1 400.1324008 MHz

F2 - Processing parameters  
 SI 16384  
 SF 400.1300022 MHz  
 WDW EM  
 SSB 0  
 LB 0 Hz  
 GB 0  
 PC 1.00

<sup>13</sup>C NMR spectrum of compound 4 (CDCl<sub>3</sub>, 100 MHz)

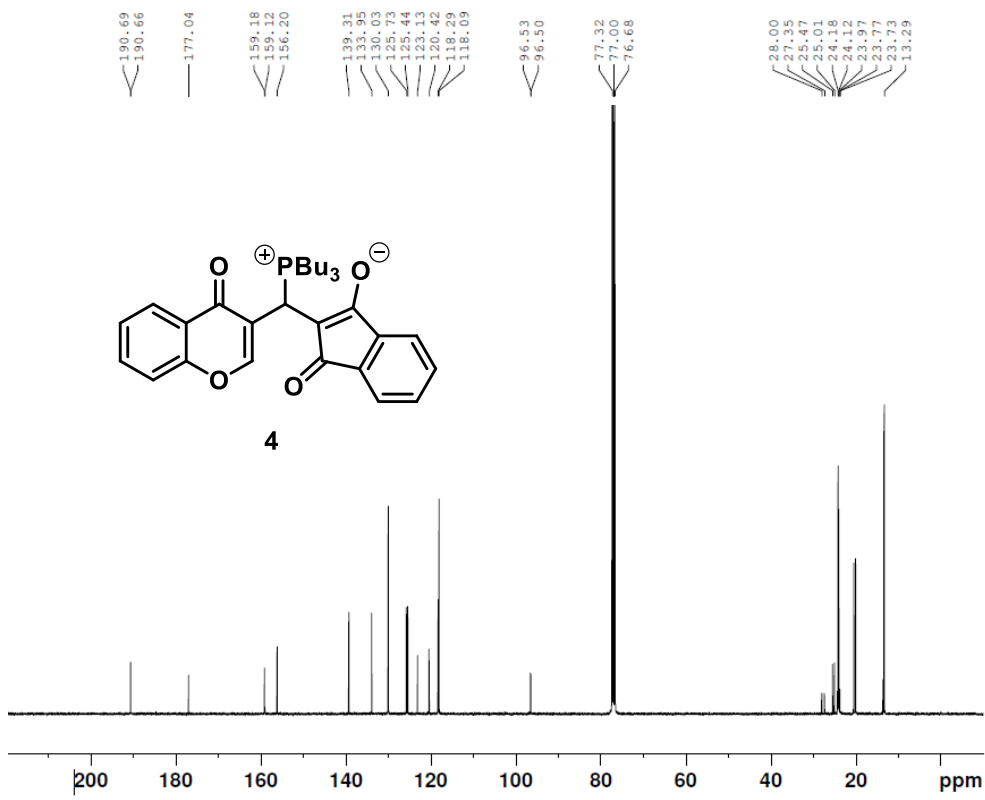

Current Data Parameters  
 NAME DP-1037  
 EXPNO 7  
 PROCNO 1

F2 - Acquisition Parameters  
 Date\_ 20240303  
 Time 23.48  
 INSTRUM spect  
 PROBHD 5 mm BBO BB-1H  
 PULPROG zgpg30  
 TD 32768  
 SOLVENT CDCl3  
 NS 13260  
 DS 0  
 SWH 24038.461 Hz  
 FIDRES 0.733596 Hz  
 AQ 0.6815744 sec  
 RG 4096  
 DW 20.800 usec  
 DE 6.50 usec  
 TE 298.3 K  
 D1 2.00000000 sec  
 D11 0.03000000 sec  
 TD0 1

==== CHANNEL f1 =====  
 NUC1 13C  
 P1 10.00 usec  
 PL1 4.20 dB  
 SFO1 100.6233325 MHz

==== CHANNEL f2 =====  
 CPDPRG[2] waltz16  
 NUC2 1H  
 PCPD2 90.00 usec  
 PL2 10.20 dB  
 PL12 26.00 dB  
 PL13 29.00 dB  
 SFO2 400.1316005 MHz

F2 - Processing parameters  
 SI 32768  
 SF 100.6127719 MHz  
 WDW EM  
 SSB 0  
 LB 1.00 Hz  
 GB 0  
 FC 1.00

<sup>31</sup>P NMR spectrum of compound 4 (CDCl<sub>3</sub>, 162 MHz)

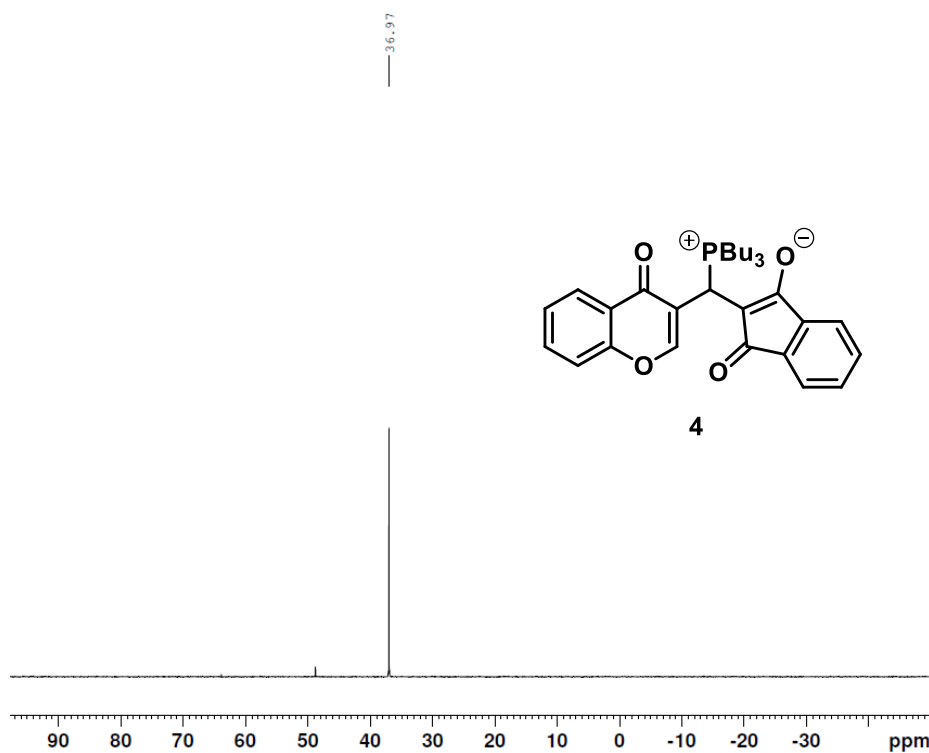

Current Data Parameters  
NAME DP-1150(3f)  
EXPNO 7  
PROCNO 1

F2 - Acquisition Parameters  
Date\_ 20240311  
Time 11.20  
INSTRUM spect  
PROBHD 5 mm PABBO BB/  
PULPROG zgpg30  
TD 65536  
SOLVENT CDCl3  
NS 16  
DS 4  
SWH 49019.609 Hz  
FIDRES 0.747980 Hz  
AQ 0.6684672 sec  
RG 198.09  
DW 10.200 usec  
DE 6.50 usec  
TE 298.4 K  
D1 2.0000000 sec  
D11 0.03000000 sec  
TD0 1

==== CHANNEL f1 =====  
SFO1 161.9836917 MHz  
NUC1 31P  
P1 15.00 usec  
PLW1 13.19999981 W

==== CHANNEL f2 =====  
SFO2 400.1316005 MHz  
NUC2 1H  
CPDPRG[2] waltz16  
PCPD2 90.00 usec  
PLW2 12.50000000 W  
PLW12 0.34722000 W  
PLW13 0.28125000 W

F2 - Processing parameters  
SI 32768  
SF 161.9755930 MHz  
WDW EM  
SSB 0  
LB 2.00 Hz  
GB 0  
PC 1.40

<sup>1</sup>H NMR spectrum of compound 7 (CDCl<sub>3</sub>, 400 MHz)

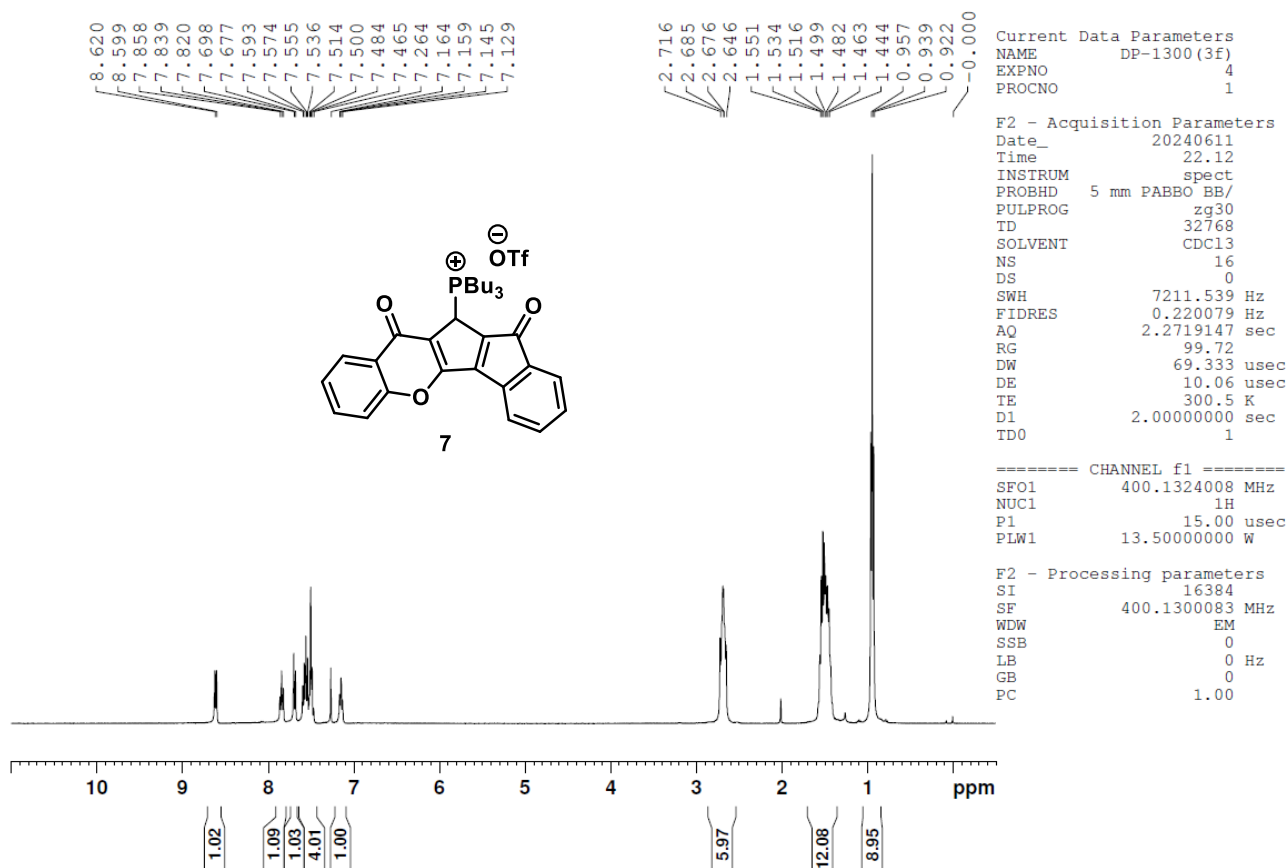

<sup>13</sup>C NMR spectrum of compound 7 (CDCl<sub>3</sub>, 100 MHz)

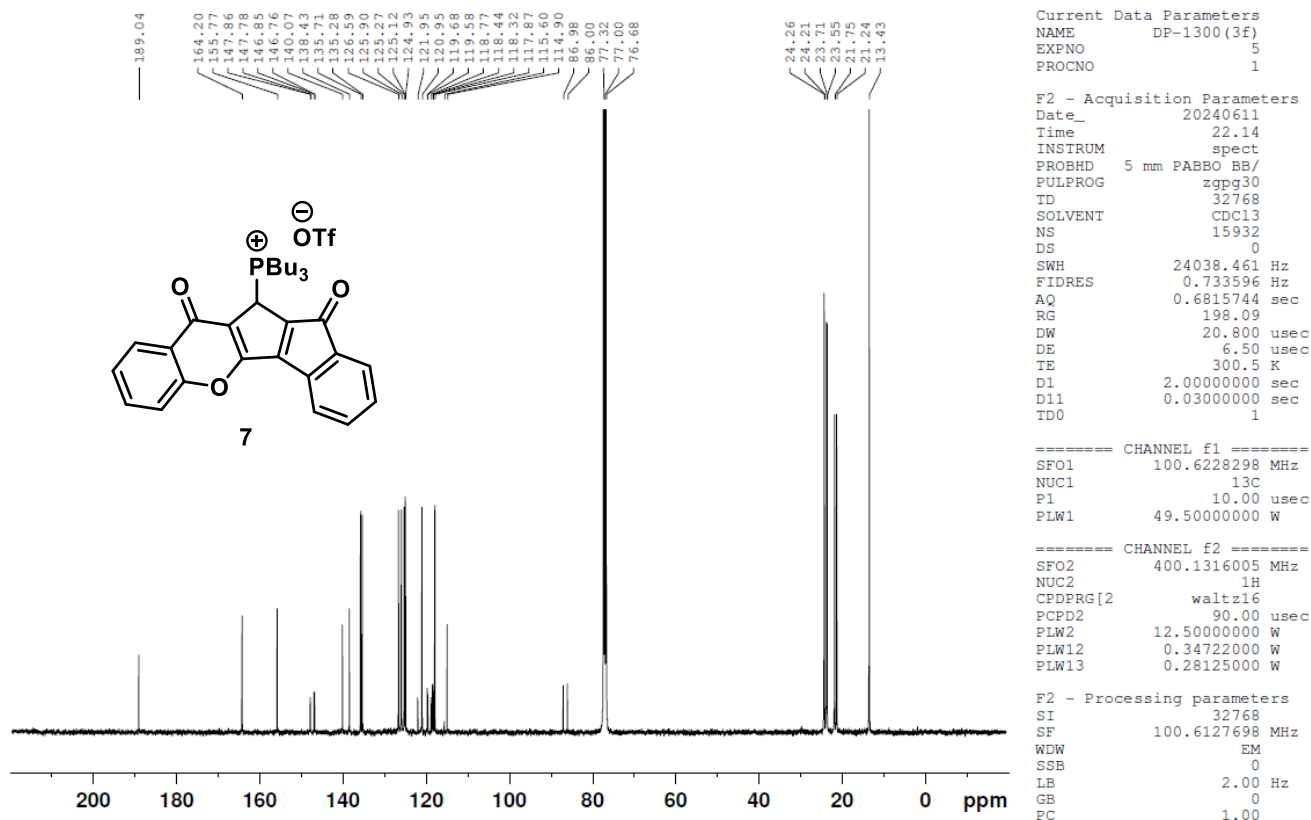

<sup>31</sup>P NMR spectrum of compound 7 (CDCl<sub>3</sub>, 162 MHz)

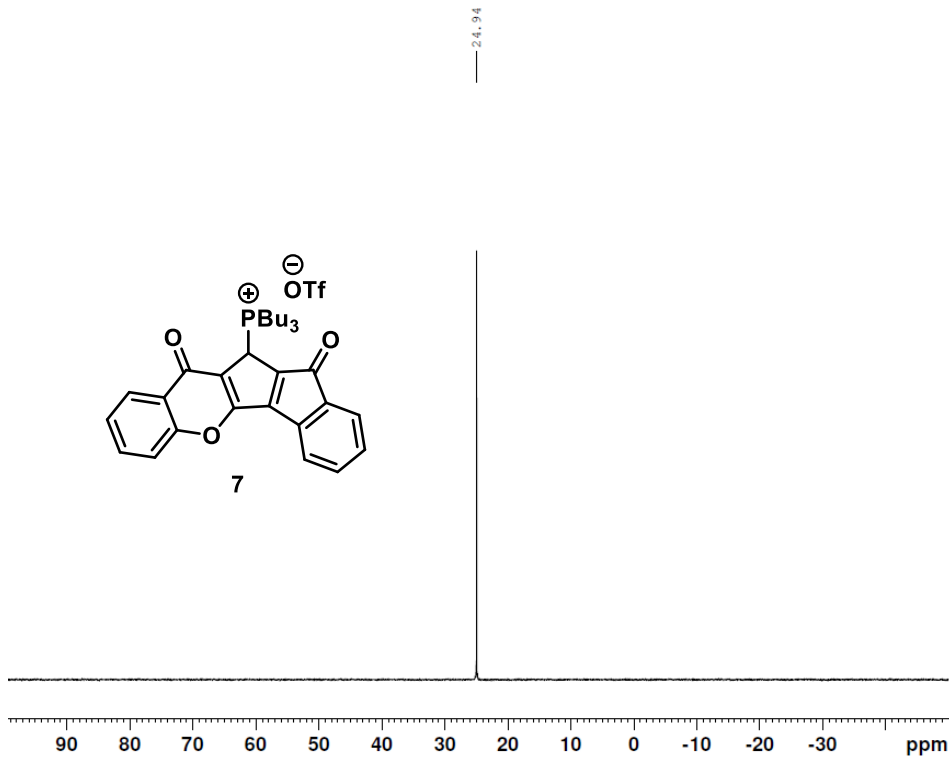

Current Data Parameters  
NAME DP-1300 (3f)  
EXPNO 1  
PROCNO 1

F2 - Acquisition Parameters  
Date\_ 20240611  
Time 21.41  
INSTRUM spect  
PROBHD 5 mm PABBO BB/  
PULPROG zgpg30  
TD 65536  
SOLVENT CDCl3  
NS 7  
DS 4  
SWH 49019.609 Hz  
FIDRES 0.747980 Hz  
AQ 0.6684672 sec  
RG 198.09  
DW 10.200 usec  
DE 6.50 usec  
TE 300.5 K  
D1 2.00000000 sec  
D11 0.03000000 sec  
TD0 1

==== CHANNEL f1 =====  
SFO1 161.9836917 MHz  
NUC1 <sup>31</sup>P  
P1 15.00 usec  
PLW1 13.19999981 W

==== CHANNEL f2 =====  
SFO2 400.1316005 MHz  
NUC2 <sup>1</sup>H  
CPDPRG[2] waltz16  
PCPD2 90.00 usec  
PLW2 12.50000000 W  
PLW12 0.34722000 W  
PLW13 0.28125000 W

F2 - Processing parameters  
SI 32768  
SF 161.9755930 MHz  
WDW EM  
SSB 0  
LB 2.00 Hz  
GB 0  
PC 1.40

<sup>19</sup>F NMR spectrum of compound 7 (CDCl<sub>3</sub>, 376 MHz)

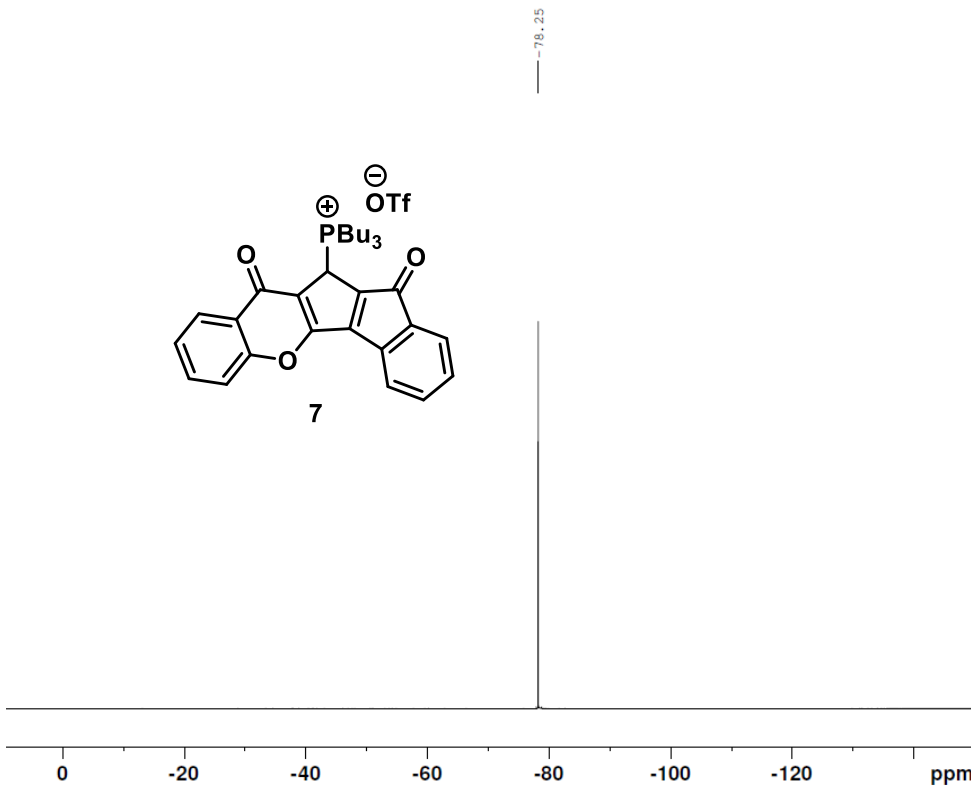

Current Data Parameters  
NAME DP-1300 (3f)  
EXPNO 3  
PROCNO 1

F2 - Acquisition Parameters  
Date\_ 20240611  
Time 21.45  
INSTRUM spect  
PROBHD 5 mm PABBO BB/  
PULPROG zgig  
TD 131072  
SOLVENT CDCl3  
NS 16  
DS 0  
SWH 89285.711 Hz  
FIDRES 0.681196 Hz  
AQ 0.7340032 sec  
RG 198.09  
DW 5.600 usec  
DE 6.50 usec  
TE 300.6 K  
D1 1.00000000 sec  
D11 0.03000000 sec  
TD0 1

==== CHANNEL f1 =====  
SFO1 376.4607168 MHz  
NUC1 <sup>19</sup>F  
P1 15.00 usec  
PLW1 16.50000000 W

==== CHANNEL f2 =====  
SFO2 400.1316005 MHz  
NUC2 <sup>1</sup>H  
CPDPRG[2] waltz16  
PCPD2 90.00 usec  
PLW2 12.50000000 W  
PLW12 0.34722000 W

F2 - Processing parameters  
SI 65536  
SF 376.4983662 MHz  
WDW EM  
SSB 0  
LB 1.00 Hz  
GB 0  
PC 1.00

<sup>1</sup>H NMR spectrum of compound 8 (DMSO, 400 MHz)

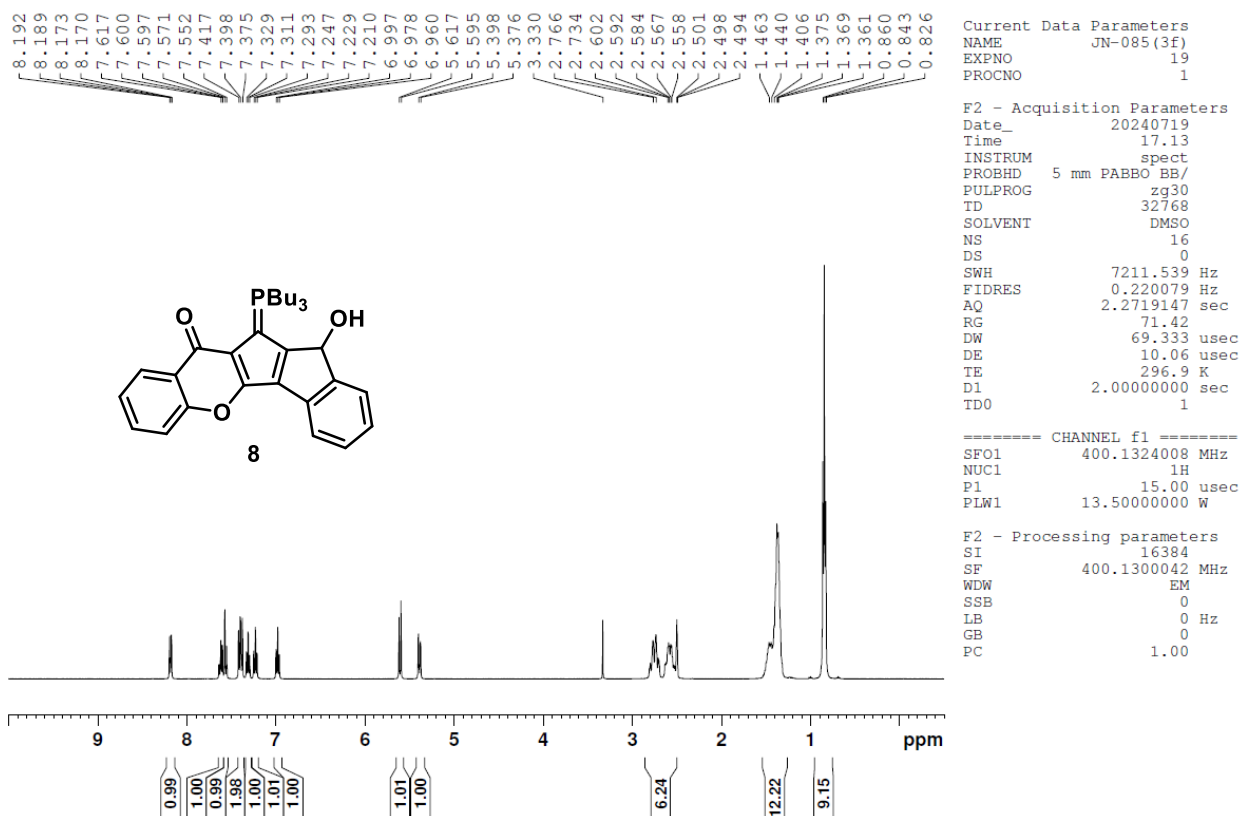

<sup>13</sup>C NMR spectrum of compound 8 (DMSO, 100 MHz)

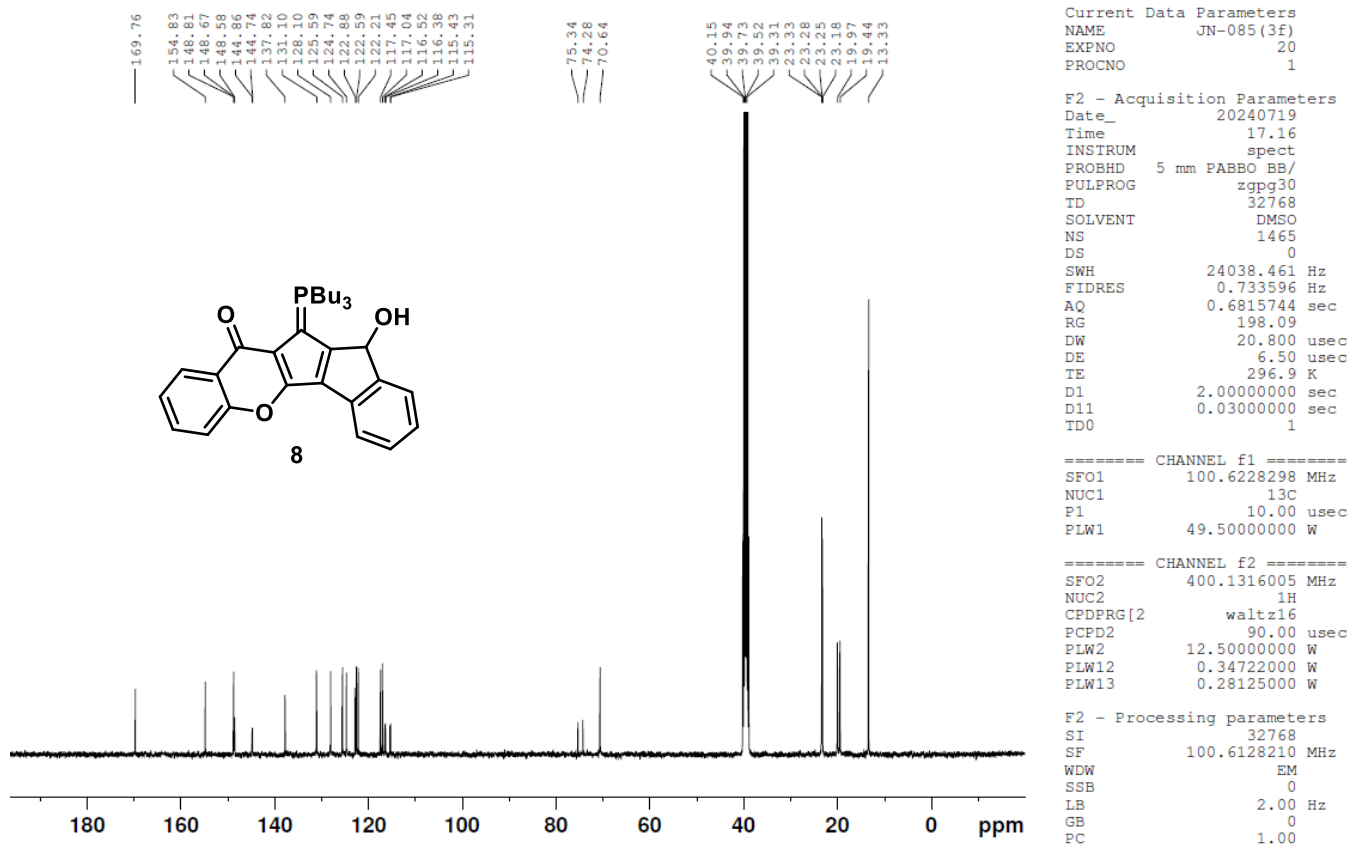



<sup>31</sup>P NMR spectrum of compound 8 (DMSO, 162 MHz)

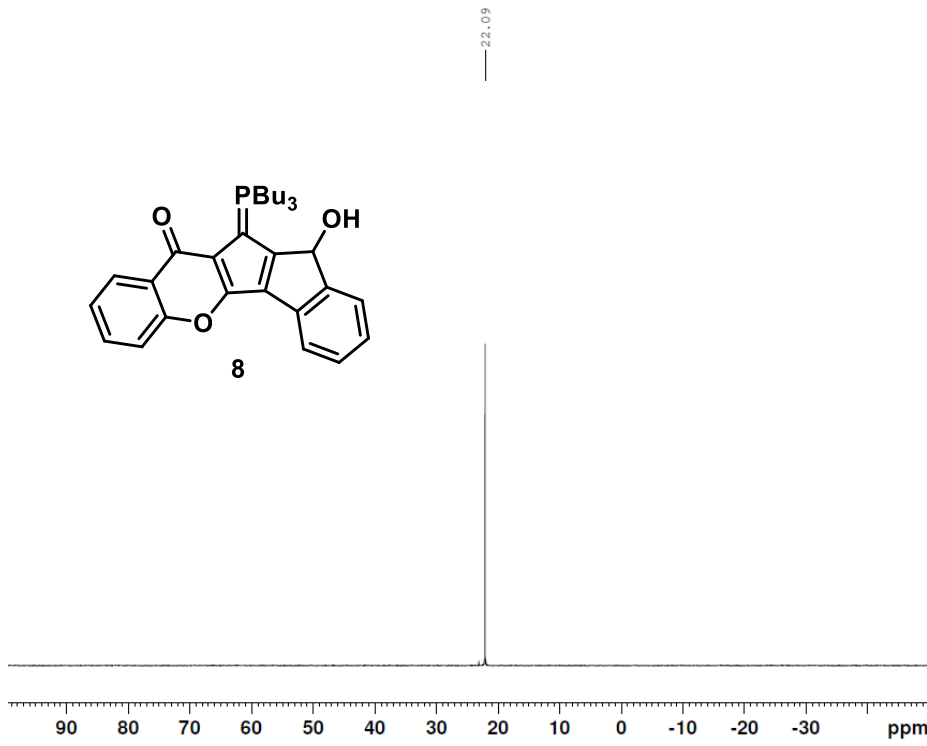

Current Data Parameters  
NAME JN-085(3f)  
EXPNO 21  
PROCNO 1

F2 - Acquisition Parameters  
Date\_ 20240721  
Time 11.31  
INSTRUM spect  
PROBHD 5 mm PABBO BB/  
PULPROG zgpg30  
TD 65536  
SOLVENT DMSO  
NS 16  
DS 4  
SWH 49019.609 Hz  
FIDRES 0.747980 Hz  
AQ 0.6684672 sec  
RG 198.09  
DW 10.200 usec  
DE 6.50 usec  
TE 297.0 K  
D1 2.00000000 sec  
D11 0.03000000 sec  
TD0 1

==== CHANNEL f1 =====  
SFO1 161.9836917 MHz  
NUC1 31P  
P1 15.00 usec  
PLW1 13.19999981 W

==== CHANNEL f2 =====  
SFO2 400.1316005 MHz  
NUC2 1H  
CPDPRG[2] waltz16  
PCPD2 90.00 usec  
PLW2 12.50000000 W  
PLW12 0.34722000 W  
PLW13 0.28125000 W

F2 - Processing parameters  
SI 32768  
SF 161.9755930 MHz  
WDW EM  
SSB 0  
LB 2.00 Hz  
GB 0  
PC 1.40

<sup>1</sup>H NMR spectrum of compound **9** (CDCl<sub>3</sub>, 400 MHz)

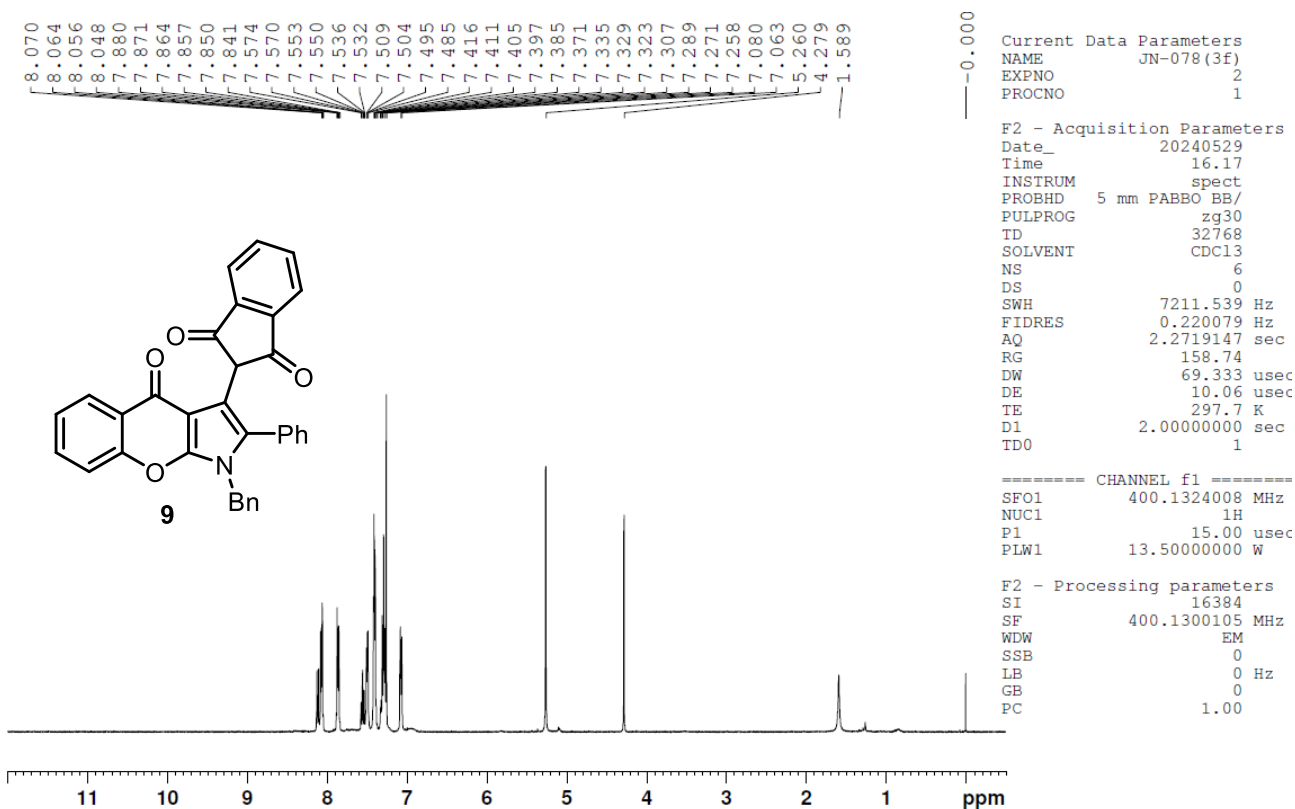

<sup>13</sup>C NMR spectrum of compound **9** (CDCl<sub>3</sub>, 100 MHz)

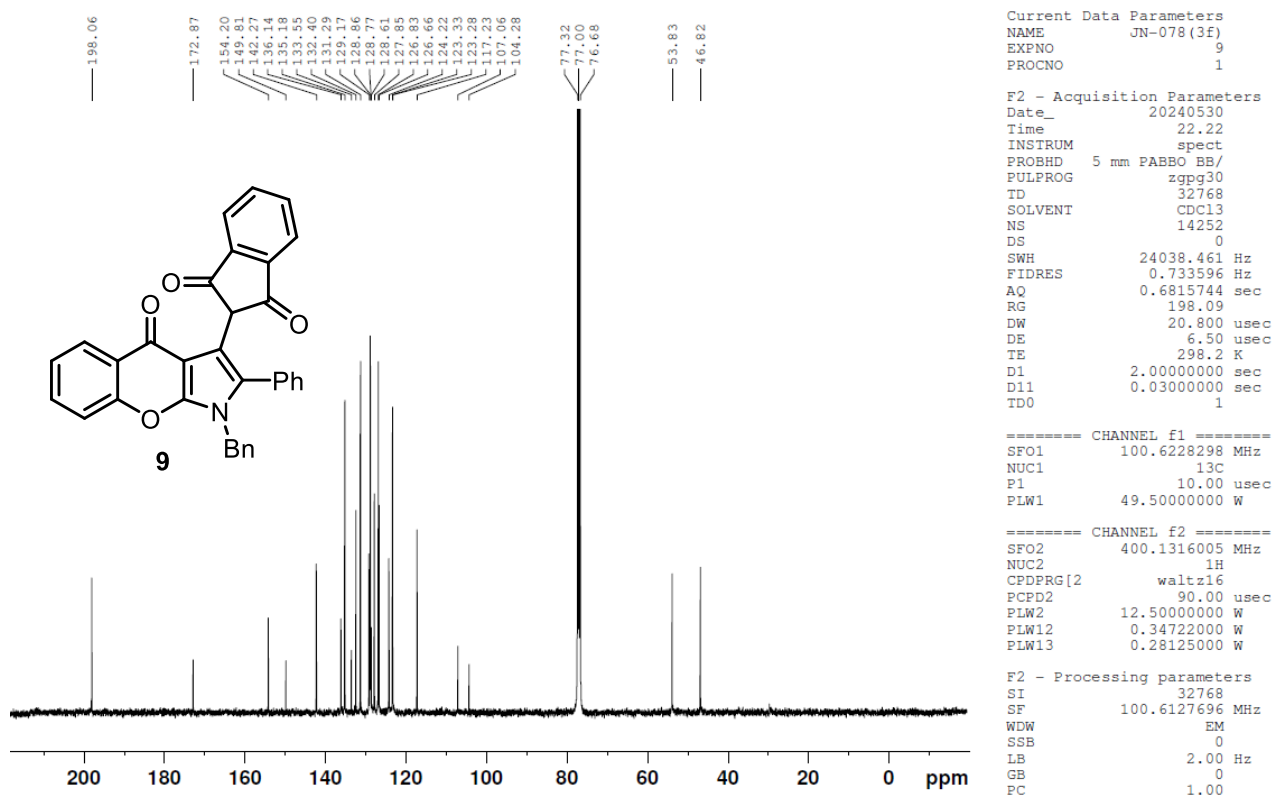

Supplement: d4cc03210a2.pdf [file d4cc03210a2.pdf]
