# Supplementary material for: Diversity-oriented synthesis of chromone inden-1-one-fused cyclopentadienylides and C-acylated chromone adducts via allylic phosphorus ylides
Source: Royal Society of Chemistry journal article supplement (doi:10.1039/d4cc03210a), 2024-01-01
Supplement: d4cc03210a1.pdf [file d4cc03210a1.pdf]

## HRMS data of compounds **1g** and **1k**.

### [ Mass Spectrum ]

Data : 20240523\_HREI.DP-982001 Date : 23-May-2024 15:04

RT : 1.04 min Scan# : 8

Elements : C 20/0, H 10/0, N 1/0, O 6/0

Mass Tolerance : 100ppm, 5mmu if m/z < 50, 50mmu if m/z > 500

Unsaturation (U.S.) : -0.5 - 100.0

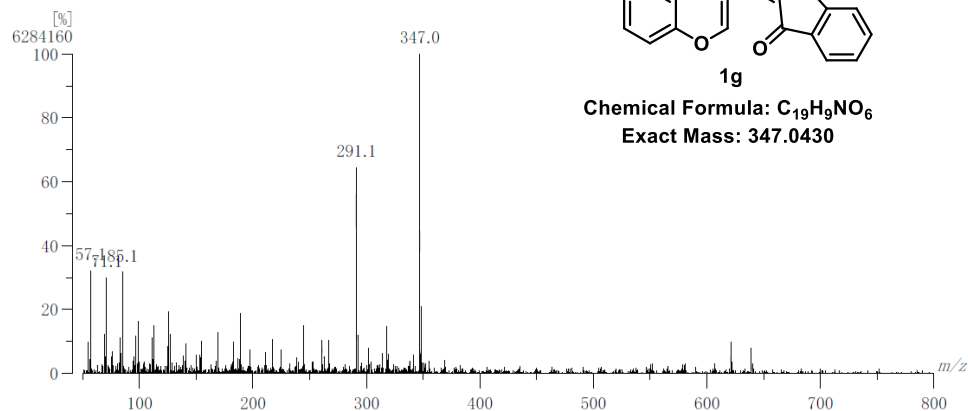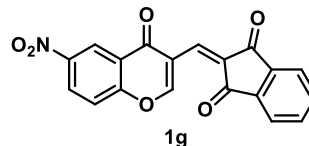

**Chemical Formula:** C<sub>19</sub>H<sub>9</sub>NO<sub>6</sub>  
**Exact Mass:** 347.0430

| Observed m/z  | Int%   | Err [ppm / mmu] | U.S. | C  | H | N | O |
|---------------|--------|-----------------|------|----|---|---|---|
| 347.0425      | 100.00 |                 |      |    |   |   |   |
| Estimated m/z |        |                 |      |    |   |   |   |
| 1 347.0430    |        | -1.4 / -0.5     | 16.0 | 19 | 9 | 1 | 6 |

### [ Mass Spectrum ]

Data : 20240524\_HREI.DP-983001 Date : 24-May-2024 16:10

RT : 1.19 min Scan# : 9

Elements : C 20/0, H 10/0, N 1/0, O 6/0

Mass Tolerance : 100ppm, 5mmu if m/z < 50, 50mmu if m/z > 500

Unsaturation (U.S.) : -0.5 - 100.0

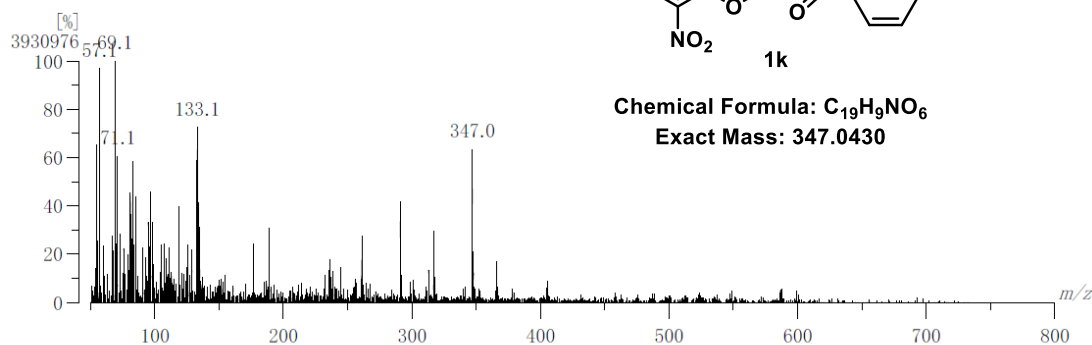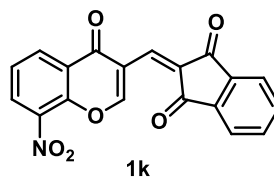

**Chemical Formula:** C<sub>19</sub>H<sub>9</sub>NO<sub>6</sub>  
**Exact Mass:** 347.0430

| Observed m/z  | Int%  | Err [ppm / mmu] | U.S. | C  | H | N | O |
|---------------|-------|-----------------|------|----|---|---|---|
| 347.0423      | 63.37 |                 |      |    |   |   |   |
| Estimated m/z |       |                 |      |    |   |   |   |
| 1 347.0430    |       | -2.0 / -0.7     | 16.0 | 19 | 9 | 1 | 6 |
